# Supplementary material for: Probiotic Properties and Proteomic Analysis of Pediococcus pentosaceus 1101
Source: MDPI journal article supplement (doi:10.3390/foods12010046), 2022-12-22
Supplement: s1 [file s1]

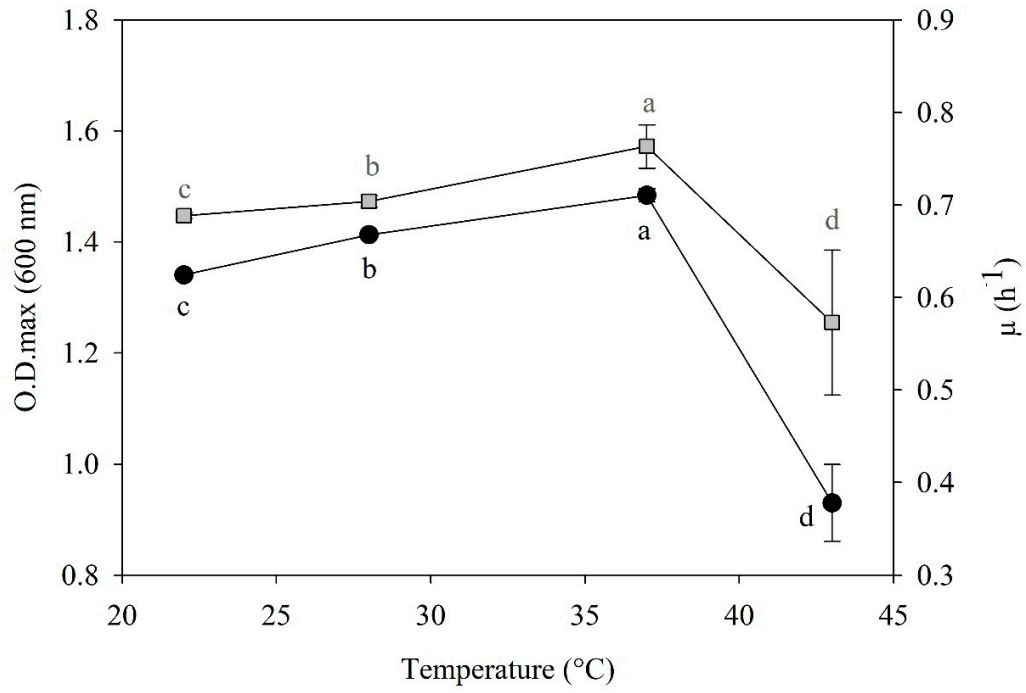

**Figure S1.** Influence of temperature (22, 28, 37 and 43 °C) on the growth of *P. pentosaceus* 1101: O.D. max (●),  $\mu$  (■). The determinations were performed in triplicate, and the values represented are the mean with standard deviation of three independent experiments performed with three different cultures. Different letters indicate significant differences ( $p < 0.05$ ) according to Duncan's multiple comparison of means.

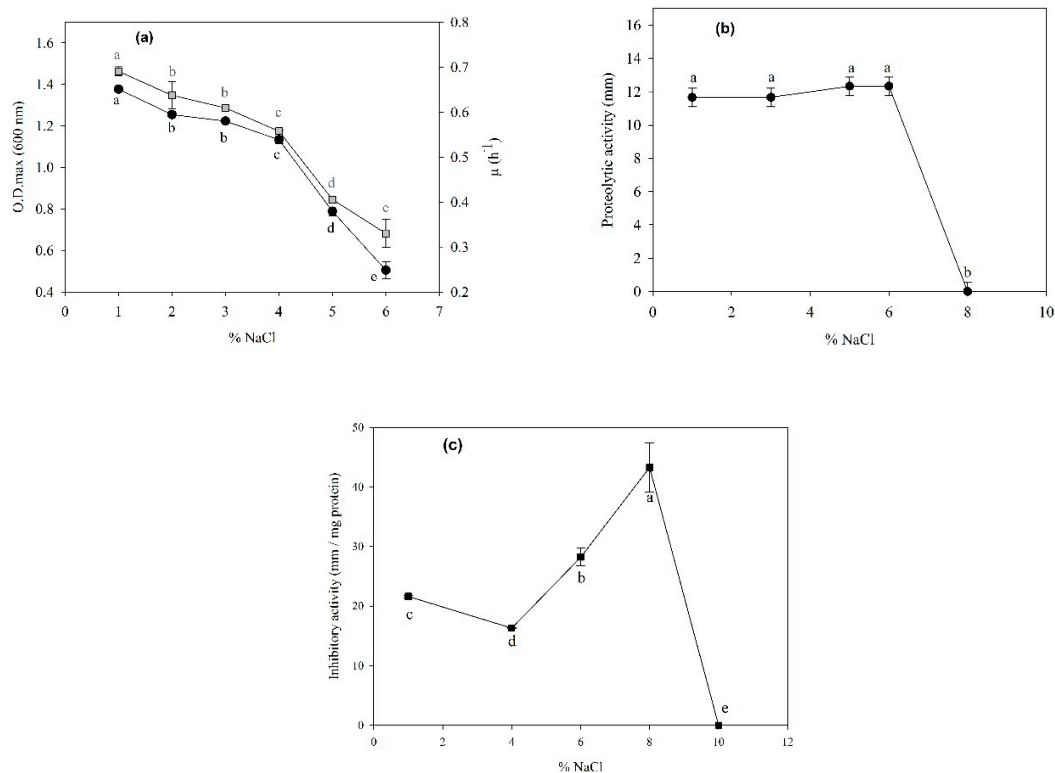

**Figure S2.** (a) Influence of NaCl (%) (1-6) on the growth of *P. pentosaceus* 1101: O.D. max (●),  $\mu$  (■). (b) Proteolytic activity curve (% NaCl 1-8). (c) Inhibitory activity with *Listeria innocua* (% NaCl 1-10). The determinations were performed in triplicate, and the values represented are the mean with standard deviation of three independent experiments performed with three different cultures. Different letters indicate significant differences ( $p < 0.05$ ) according to Duncan's multiple comparison of means.
