# Supplementary material for: Probiotic Properties and Proteomic Analysis of Pediococcus pentosaceus 1101
Source: Foods. 2022 Dec 22;12(1):46. doi: 10.3390/foods12010046 (PMC9818561; doi:10.3390/foods12010046)
Supplement: Supplementary file 1 [file foods-12-00046-s001.zip › Table S1 The mass spectrometry data for protein identification.xlsx]

## Sheet: Peptide Report for Monserrat_20
	Database Name: the Uniprot_Pediococcus_Pentosaceus_strain_ATCC_20220729 database
Search Engine Set: 1 Search Engine
	Search Engine: Mascot
		Version: 2.6.2
		Fragment Tolerance: 0.60 Da (Monoisotopic)
		Parent Tolerance: 10.0 PPM (Monoisotopic)
		Fixed Modifications: +57 on C (Carbamidomethyl)
		Variable Modifications: +16 on M (Oxidation)
		Digestion Enzyme: Trypsin
		Max Missed Cleavages: 1
Scaffold: Version: Scaffold_5.1.2
	Modification Metadata Set: 2594 modifications
	Protein Grouping Strategy: Experiment-wide grouping with protein cluster analysis
	Peptide Thresholds: 90.0% minimum
	Protein Thresholds: 90.0% minimum and 1 peptide minimum
Table 1. The mass spectrometry data for protein identification
Biological sample category	MS/MS sample name	Protein name	Protein accession numbers	Alternate IDs	Database sources	Protein molecular weight (Da)	Protein identification probability	Exclusive unique peptide count	Exclusive unique spectrum count	Total spectrum count	Percentage of total spectra	Percentage sequence coverage	Peptide sequence	Previous amino acid	Next amino acid	Best Peptide identification probability	Best Mascot Ion Score	Best Mascot Identity Score	Best Mascot Delta Ion Score	Calculated +1H Peptide Mass (AMU)	Median Retention Time	Total TIC	Peptide start index	Peptide stop index
sample Treatment	2022 5:30:55 PM;File Size: 1000722054 [Byte] (F057606)	Chaperone protein DnaJ OS=Pediococcus pentosaceus (strain ATCC 25745 / CCUG 21536 / LMG 10740 / 183-1w) OX=278197 GN=dnaJ PE=3 SV=1	DNAJ_PEDPA	dnaJ	Uniprot_Pediococcus_pentosaceus_strain_ATCC.fasta	40343.9	1	8	8	15	0.000326	0.227	AANKDYYDILGVSK	M	D	0.982	37.3	25	37.3	1556.8	2907	158696	2	15
sample Treatment	2022 5:30:55 PM;File Size: 1000722054 [Byte] (F057606)	Chaperone protein DnaJ OS=Pediococcus pentosaceus (strain ATCC 25745 / CCUG 21536 / LMG 10740 / 183-1w) OX=278197 GN=dnaJ PE=3 SV=1	DNAJ_PEDPA	dnaJ	Uniprot_Pediococcus_pentosaceus_strain_ATCC.fasta	40343.9	1	8	8	15	0.000326	0.227	DVNEAYEVLGDSQK	K	R	0.992	43.3	25	43.3	1566.73	2763.5	86166.1	49	62
sample Treatment	2022 5:30:55 PM;File Size: 1000722054 [Byte] (F057606)	Chaperone protein DnaJ OS=Pediococcus pentosaceus (strain ATCC 25745 / CCUG 21536 / LMG 10740 / 183-1w) OX=278197 GN=dnaJ PE=3 SV=1	DNAJ_PEDPA	dnaJ	Uniprot_Pediococcus_pentosaceus_strain_ATCC.fasta	40343.9	1	8	8	15	0.000326	0.227	DYYDILGVSK	K	D	0.96	32.4	25	32.4	1172.58	3148.5	139903	6	15
sample Treatment	2022 5:30:55 PM;File Size: 1000722054 [Byte] (F057606)	Chaperone protein DnaJ OS=Pediococcus pentosaceus (strain ATCC 25745 / CCUG 21536 / LMG 10740 / 183-1w) OX=278197 GN=dnaJ PE=3 SV=1	DNAJ_PEDPA	dnaJ	Uniprot_Pediococcus_pentosaceus_strain_ATCC.fasta	40343.9	1	8	8	15	0.000326	0.227	EKCPTCGGTGHTSQQHEVK	K	V	0.995	34.5	25	34.5	2140.95	1157.5	80249.5	203	221
sample Treatment	2022 5:30:55 PM;File Size: 1000722054 [Byte] (F057606)	Chaperone protein DnaJ OS=Pediococcus pentosaceus (strain ATCC 25745 / CCUG 21536 / LMG 10740 / 183-1w) OX=278197 GN=dnaJ PE=3 SV=1	DNAJ_PEDPA	dnaJ	Uniprot_Pediococcus_pentosaceus_strain_ATCC.fasta	40343.9	1	8	8	15	0.000326	0.227	FEEAIFGK	K	K	0.99	46.4	25	46.4	940.477	2752.5	202037	129	136
sample Treatment	2022 5:30:55 PM;File Size: 1000722054 [Byte] (F057606)	Chaperone protein DnaJ OS=Pediococcus pentosaceus (strain ATCC 25745 / CCUG 21536 / LMG 10740 / 183-1w) OX=278197 GN=dnaJ PE=3 SV=1	DNAJ_PEDPA	dnaJ	Uniprot_Pediococcus_pentosaceus_strain_ATCC.fasta	40343.9	1	8	8	15	0.000326	0.227	FKDVNEAYEVLGDSQK	K	R	0.995	46.9	25	46.9	1841.89	2819	33554.9	47	62
sample Treatment	2022 5:30:55 PM;File Size: 1000722054 [Byte] (F057606)	Chaperone protein DnaJ OS=Pediococcus pentosaceus (strain ATCC 25745 / CCUG 21536 / LMG 10740 / 183-1w) OX=278197 GN=dnaJ PE=3 SV=1	DNAJ_PEDPA	dnaJ	Uniprot_Pediococcus_pentosaceus_strain_ATCC.fasta	40343.9	1	8	8	15	0.000326	0.227	LKVPAGTQTGTNFR	K	L	0.997	58.7	25	55.2	1489.81	2220.5	204707	299	312
sample Treatment	2022 5:30:55 PM;File Size: 1000722054 [Byte] (F057606)	Chaperone protein DnaJ OS=Pediococcus pentosaceus (strain ATCC 25745 / CCUG 21536 / LMG 10740 / 183-1w) OX=278197 GN=dnaJ PE=3 SV=1	DNAJ_PEDPA	dnaJ	Uniprot_Pediococcus_pentosaceus_strain_ATCC.fasta	40343.9	1	8	8	15	0.000326	0.227	VSVPAGVEDGQQMR	K	L	0.995	47.2	25	47.2	1472.72	2312	91630.2	222	235
sample Treatment	2022 5:30:55 PM;File Size: 1000722054 [Byte] (F057606)	DNA gyrase subunit A OS=Pediococcus pentosaceus (strain ATCC 25745 / CCUG 21536 / LMG 10740 / 183-1w) OX=278197 GN=gyrA PE=3 SV=1	Q03I55_PEDPA	gyrA	Uniprot_Pediococcus_pentosaceus_strain_ATCC.fasta	93736.6	1	9	9	16	0.000348	0.123	AYETGHGTIILR	K	A	0.997	64.8	25	64.8	1330.71	2304	205669	233	244
sample Treatment	2022 5:30:55 PM;File Size: 1000722054 [Byte] (F057606)	DNA gyrase subunit A OS=Pediococcus pentosaceus (strain ATCC 25745 / CCUG 21536 / LMG 10740 / 183-1w) OX=278197 GN=gyrA PE=3 SV=1	Q03I55_PEDPA	gyrA	Uniprot_Pediococcus_pentosaceus_strain_ATCC.fasta	93736.6	1	9	9	16	0.000348	0.123	FDVNNVSTTGR	R	A	0.997	72.5	25	70.6	1209.59	2165.5	171839	779	789
sample Treatment	2022 5:30:55 PM;File Size: 1000722054 [Byte] (F057606)	DNA gyrase subunit A OS=Pediococcus pentosaceus (strain ATCC 25745 / CCUG 21536 / LMG 10740 / 183-1w) OX=278197 GN=gyrA PE=3 SV=1	Q03I55_PEDPA	gyrA	Uniprot_Pediococcus_pentosaceus_strain_ATCC.fasta	93736.6	1	9	9	16	0.000348	0.123	IEGITDVNDESDR	R	D	0.988	39.6	25	39.6	1462.67	2208	30746.2	286	298
sample Treatment	2022 5:30:55 PM;File Size: 1000722054 [Byte] (F057606)	DNA gyrase subunit A OS=Pediococcus pentosaceus (strain ATCC 25745 / CCUG 21536 / LMG 10740 / 183-1w) OX=278197 GN=gyrA PE=3 SV=1	Q03I55_PEDPA	gyrA	Uniprot_Pediococcus_pentosaceus_strain_ATCC.fasta	93736.6	1	9	9	16	0.000348	0.123	IEGITDVNDESDRDGLR	R	V	0.994	46.8	25	46.8	1903.9	2435	370732	286	302
sample Treatment	2022 5:30:55 PM;File Size: 1000722054 [Byte] (F057606)	DNA gyrase subunit A OS=Pediococcus pentosaceus (strain ATCC 25745 / CCUG 21536 / LMG 10740 / 183-1w) OX=278197 GN=gyrA PE=3 SV=1	Q03I55_PEDPA	gyrA	Uniprot_Pediococcus_pentosaceus_strain_ATCC.fasta	93736.6	1	9	9	16	0.000348	0.123	ILYGMNELGVTPEKPYK	R	K	0.994	47	25	38.3	1952.02	3066.5	150511	49	65
sample Treatment	2022 5:30:55 PM;File Size: 1000722054 [Byte] (F057606)	DNA gyrase subunit A OS=Pediococcus pentosaceus (strain ATCC 25745 / CCUG 21536 / LMG 10740 / 183-1w) OX=278197 GN=gyrA PE=3 SV=1	Q03I55_PEDPA	gyrA	Uniprot_Pediococcus_pentosaceus_strain_ATCC.fasta	93736.6	1	9	9	16	0.000348	0.123	INEIIYK	R	E	0.9	46.6	25	46.6	892.514	2244.5	273368	464	470
sample Treatment	2022 5:30:55 PM;File Size: 1000722054 [Byte] (F057606)	DNA gyrase subunit A OS=Pediococcus pentosaceus (strain ATCC 25745 / CCUG 21536 / LMG 10740 / 183-1w) OX=278197 GN=gyrA PE=3 SV=1	Q03I55_PEDPA	gyrA	Uniprot_Pediococcus_pentosaceus_strain_ATCC.fasta	93736.6	1	9	9	16	0.000348	0.123	ITDVNLSSQMR	R	T	0.995	47.6	25	45.6	1263.64	2431	168851	9	19
sample Treatment	2022 5:30:55 PM;File Size: 1000722054 [Byte] (F057606)	DNA gyrase subunit A OS=Pediococcus pentosaceus (strain ATCC 25745 / CCUG 21536 / LMG 10740 / 183-1w) OX=278197 GN=gyrA PE=3 SV=1	Q03I55_PEDPA	gyrA	Uniprot_Pediococcus_pentosaceus_strain_ATCC.fasta	93736.6	1	9	9	16	0.000348	0.123	ITLEMLR	K	D	0.9	29.1	25	29.1	875.502	3065	46607.9	131	137
sample Treatment	2022 5:30:55 PM;File Size: 1000722054 [Byte] (F057606)	DNA gyrase subunit A OS=Pediococcus pentosaceus (strain ATCC 25745 / CCUG 21536 / LMG 10740 / 183-1w) OX=278197 GN=gyrA PE=3 SV=1	Q03I55_PEDPA	gyrA	Uniprot_Pediococcus_pentosaceus_strain_ATCC.fasta	93736.6	1	9	9	16	0.000348	0.123	NTVDFQENYDGTEREPSILPAR	K	F	0.983	37.9	25	37.9	2551.21	2913.5	158712	142	163
sample Treatment	2022 5:30:55 PM;File Size: 1000722054 [Byte] (F057606)	Ribonucleoside-diphosphate reductase OS=Pediococcus pentosaceus (strain ATCC 25745 / CCUG 21536 / LMG 10740 / 183-1w) OX=278197 GN=PEPE_1489 PE=3 SV=1	Q03E52_PEDPA	PEPE_1489	Uniprot_Pediococcus_pentosaceus_strain_ATCC.fasta	37021.4	1	7	7	12	0.000261	0.265	ELGENEQQEIK	K	D	0.997	69.2	25	69.2	1316.63	1868.5	107799	208	218
sample Treatment	2022 5:30:55 PM;File Size: 1000722054 [Byte] (F057606)	Ribonucleoside-diphosphate reductase OS=Pediococcus pentosaceus (strain ATCC 25745 / CCUG 21536 / LMG 10740 / 183-1w) OX=278197 GN=PEPE_1489 PE=3 SV=1	Q03E52_PEDPA	PEPE_1489	Uniprot_Pediococcus_pentosaceus_strain_ATCC.fasta	37021.4	1	7	7	12	0.000261	0.265	IPISNDLSDWR	R	E	0.997	72.4	25	70	1315.66	3104.5	262680	34	44
sample Treatment	2022 5:30:55 PM;File Size: 1000722054 [Byte] (F057606)	Ribonucleoside-diphosphate reductase OS=Pediococcus pentosaceus (strain ATCC 25745 / CCUG 21536 / LMG 10740 / 183-1w) OX=278197 GN=PEPE_1489 PE=3 SV=1	Q03E52_PEDPA	PEPE_1489	Uniprot_Pediococcus_pentosaceus_strain_ATCC.fasta	37021.4	1	7	7	12	0.000261	0.265	IYELYHDDEHPLK	R	K	0.967	26.6	25	26.6	1671.8	2398	195693	136	148
sample Treatment	2022 5:30:55 PM;File Size: 1000722054 [Byte] (F057606)	Ribonucleoside-diphosphate reductase OS=Pediococcus pentosaceus (strain ATCC 25745 / CCUG 21536 / LMG 10740 / 183-1w) OX=278197 GN=PEPE_1489 PE=3 SV=1	Q03E52_PEDPA	PEPE_1489	Uniprot_Pediococcus_pentosaceus_strain_ATCC.fasta	37021.4	1	7	7	12	0.000261	0.265	IYELYHDDEHPLKK	R	K	0.985	29.5	25	29.5	1799.9	2185.5	171021	136	149
sample Treatment	2022 5:30:55 PM;File Size: 1000722054 [Byte] (F057606)	Ribonucleoside-diphosphate reductase OS=Pediococcus pentosaceus (strain ATCC 25745 / CCUG 21536 / LMG 10740 / 183-1w) OX=278197 GN=PEPE_1489 PE=3 SV=1	Q03E52_PEDPA	PEPE_1489	Uniprot_Pediococcus_pentosaceus_strain_ATCC.fasta	37021.4	1	7	7	12	0.000261	0.265	LTEQFWLDTR	K	I	0.997	67.3	25	67.3	1308.66	3258	422006	24	33
sample Treatment	2022 5:30:55 PM;File Size: 1000722054 [Byte] (F057606)	Ribonucleoside-diphosphate reductase OS=Pediococcus pentosaceus (strain ATCC 25745 / CCUG 21536 / LMG 10740 / 183-1w) OX=278197 GN=PEPE_1489 PE=3 SV=1	Q03E52_PEDPA	PEPE_1489	Uniprot_Pediococcus_pentosaceus_strain_ATCC.fasta	37021.4	1	7	7	12	0.000261	0.265	MENYEAINWNAISDQIDK	-	A	0.997	81.2	25	81.2	2153.98	3640	21900.3	1	18
sample Treatment	2022 5:30:55 PM;File Size: 1000722054 [Byte] (F057606)	Ribonucleoside-diphosphate reductase OS=Pediococcus pentosaceus (strain ATCC 25745 / CCUG 21536 / LMG 10740 / 183-1w) OX=278197 GN=PEPE_1489 PE=3 SV=1	Q03E52_PEDPA	PEPE_1489	Uniprot_Pediococcus_pentosaceus_strain_ATCC.fasta	37021.4	1	7	7	12	0.000261	0.265	TPHETAVLNNIQFMESVHAK	R	S	0.997	50.3	25	50.3	2266.13	3123.5	326516	82	101
sample Treatment	2022 5:30:55 PM;File Size: 1000722054 [Byte] (F057606)	Pyruvate/2-oxoglutarate dehydrogenase complex, dihydrolipoamide dehydrogenase (E3) component, related enzyme OS=Pediococcus pentosaceus (strain ATCC 25745 / CCUG 21536 / LMG 10740 / 183-1w) OX=278197 GN=PEPE_0244 PE=3 SV=1	Q03HI1_PEDPA	PEPE_0244	Uniprot_Pediococcus_pentosaceus_strain_ATCC.fasta	48945.7	1	2	2	4	8.7e-05	0.0631	IDQTTITSEK	K	F	0.997	63.8	25	63.8	1135.58	1807	103753	122	131
sample Treatment	2022 5:30:55 PM;File Size: 1000722054 [Byte] (F057606)	Pyruvate/2-oxoglutarate dehydrogenase complex, dihydrolipoamide dehydrogenase (E3) component, related enzyme OS=Pediococcus pentosaceus (strain ATCC 25745 / CCUG 21536 / LMG 10740 / 183-1w) OX=278197 GN=PEPE_0244 PE=3 SV=1	Q03HI1_PEDPA	PEPE_0244	Uniprot_Pediococcus_pentosaceus_strain_ATCC.fasta	48945.7	1	2	2	4	8.7e-05	0.0631	VGVELDEAQQHPEQYEIK	K	T	0.989	41.2	25	41.2	2112.02	2618.5	246038	349	366
sample Treatment	2022 5:30:55 PM;File Size: 1000722054 [Byte] (F057606)	Uncharacterized protein OS=Pediococcus pentosaceus (strain ATCC 25745 / CCUG 21536 / LMG 10740 / 183-1w) OX=278197 GN=PEPE_0608 PE=4 SV=1	Q03GH7_PEDPA	PEPE_0608	Uniprot_Pediococcus_pentosaceus_strain_ATCC.fasta	7432	0.95	1	1	2	4.35e-05	0.194	ITAEEFQDFQPR	K	F	0.997	89.2	25	89.2	1480.71	2955.5	199474	21	32
sample Treatment	2022 5:30:55 PM;File Size: 1000722054 [Byte] (F057606)	Thioredoxin OS=Pediococcus pentosaceus (strain ATCC 25745 / CCUG 21536 / LMG 10740 / 183-1w) OX=278197 GN=PEPE_1258 PE=3 SV=1	Q03ES3_PEDPA	PEPE_1258	Uniprot_Pediococcus_pentosaceus_strain_ATCC.fasta	11459.9	1	3	5	10	0.000217	0.398	DGAVVDSIVGYHSK	K	E	0.993	45.5	25	37.1	1446.72	2608	443338	79	92
sample Treatment	2022 5:30:55 PM;File Size: 1000722054 [Byte] (F057606)	Thioredoxin OS=Pediococcus pentosaceus (strain ATCC 25745 / CCUG 21536 / LMG 10740 / 183-1w) OX=278197 GN=PEPE_1258 PE=3 SV=1	Q03ES3_PEDPA	PEPE_1258	Uniprot_Pediococcus_pentosaceus_strain_ATCC.fasta	11459.9	1	3	5	10	0.000217	0.398	MDVDQNPETAR	K	N	0.997	81.3	25	81.3	1275.56	1637.5	154944	54	64
sample Treatment	2022 5:30:55 PM;File Size: 1000722054 [Byte] (F057606)	Thioredoxin OS=Pediococcus pentosaceus (strain ATCC 25745 / CCUG 21536 / LMG 10740 / 183-1w) OX=278197 GN=PEPE_1258 PE=3 SV=1	Q03ES3_PEDPA	PEPE_1258	Uniprot_Pediococcus_pentosaceus_strain_ATCC.fasta	11459.9	1	3	5	10	0.000217	0.398	MQSPVVEQLADEMGDK	R	V	0.997	84.1	25	84.1	1776.81	3449.5	127402	33	48
sample Treatment	2022 5:30:55 PM;File Size: 1000722054 [Byte] (F057606)	D-lactate dehydrogenase, LdhA OS=Pediococcus pentosaceus (strain ATCC 25745 / CCUG 21536 / LMG 10740 / 183-1w) OX=278197 GN=PEPE_0876 PE=3 SV=1	Q03FT7_PEDPA	PEPE_0876	Uniprot_Pediococcus_pentosaceus_strain_ATCC.fasta	37204.5	1	11	12	30	0.000652	0.384	AAINIFK	R	G	0.9	36.9	25	36.9	776.466	2816	388498	158	164
sample Treatment	2022 5:30:55 PM;File Size: 1000722054 [Byte] (F057606)	D-lactate dehydrogenase, LdhA OS=Pediococcus pentosaceus (strain ATCC 25745 / CCUG 21536 / LMG 10740 / 183-1w) OX=278197 GN=PEPE_0876 PE=3 SV=1	Q03FT7_PEDPA	PEPE_0876	Uniprot_Pediococcus_pentosaceus_strain_ATCC.fasta	37204.5	1	11	12	30	0.000652	0.384	AVSELLDSNTIEQAK	K	G	0.997	82.7	25	82.7	1617.83	2840	803540	29	43
sample Treatment	2022 5:30:55 PM;File Size: 1000722054 [Byte] (F057606)	D-lactate dehydrogenase, LdhA OS=Pediococcus pentosaceus (strain ATCC 25745 / CCUG 21536 / LMG 10740 / 183-1w) OX=278197 GN=PEPE_0876 PE=3 SV=1	Q03FT7_PEDPA	PEPE_0876	Uniprot_Pediococcus_pentosaceus_strain_ATCC.fasta	37204.5	1	11	12	30	0.000652	0.384	DDEKPYLEEWVK	R	D	0.981	37.2	25	37.2	1550.74	3099	429593	10	21
sample Treatment	2022 5:30:55 PM;File Size: 1000722054 [Byte] (F057606)	D-lactate dehydrogenase, LdhA OS=Pediococcus pentosaceus (strain ATCC 25745 / CCUG 21536 / LMG 10740 / 183-1w) OX=278197 GN=PEPE_0876 PE=3 SV=1	Q03FT7_PEDPA	PEPE_0876	Uniprot_Pediococcus_pentosaceus_strain_ATCC.fasta	37204.5	1	11	12	30	0.000652	0.384	EGIYVDSLEELYR	K	Q	0.997	67.7	25	67.7	1585.77	3578.5	260389	184	196
sample Treatment	2022 5:30:55 PM;File Size: 1000722054 [Byte] (F057606)	D-lactate dehydrogenase, LdhA OS=Pediococcus pentosaceus (strain ATCC 25745 / CCUG 21536 / LMG 10740 / 183-1w) OX=278197 GN=PEPE_0876 PE=3 SV=1	Q03FT7_PEDPA	PEPE_0876	Uniprot_Pediococcus_pentosaceus_strain_ATCC.fasta	37204.5	1	11	12	30	0.000652	0.384	GYDGVVAYQQKPYTDDLFDK	K	M	0.997	66.4	25	66.4	2322.09	3071	342736	44	63
sample Treatment	2022 5:30:55 PM;File Size: 1000722054 [Byte] (F057606)	D-lactate dehydrogenase, LdhA OS=Pediococcus pentosaceus (strain ATCC 25745 / CCUG 21536 / LMG 10740 / 183-1w) OX=278197 GN=PEPE_0876 PE=3 SV=1	Q03FT7_PEDPA	PEPE_0876	Uniprot_Pediococcus_pentosaceus_strain_ATCC.fasta	37204.5	1	11	12	30	0.000652	0.384	IIAYGIR	K	D	0.9	33.6	25	33.6	805.493	2349	316236	3	9
sample Treatment	2022 5:30:55 PM;File Size: 1000722054 [Byte] (F057606)	D-lactate dehydrogenase, LdhA OS=Pediococcus pentosaceus (strain ATCC 25745 / CCUG 21536 / LMG 10740 / 183-1w) OX=278197 GN=PEPE_0876 PE=3 SV=1	Q03FT7_PEDPA	PEPE_0876	Uniprot_Pediococcus_pentosaceus_strain_ATCC.fasta	37204.5	1	11	12	30	0.000652	0.384	NMVQIALENNK	K	A	0.995	46.7	25	46.7	1273.66	2790	139207	306	316
sample Treatment	2022 5:30:55 PM;File Size: 1000722054 [Byte] (F057606)	D-lactate dehydrogenase, LdhA OS=Pediococcus pentosaceus (strain ATCC 25745 / CCUG 21536 / LMG 10740 / 183-1w) OX=278197 GN=PEPE_0876 PE=3 SV=1	Q03FT7_PEDPA	PEPE_0876	Uniprot_Pediococcus_pentosaceus_strain_ATCC.fasta	37204.5	1	11	12	30	0.000652	0.384	NVGVDNVPVEALK	R	R	0.997	76.8	25	76.8	1353.74	2778.5	725097	76	88
sample Treatment	2022 5:30:55 PM;File Size: 1000722054 [Byte] (F057606)	D-lactate dehydrogenase, LdhA OS=Pediococcus pentosaceus (strain ATCC 25745 / CCUG 21536 / LMG 10740 / 183-1w) OX=278197 GN=PEPE_0876 PE=3 SV=1	Q03FT7_PEDPA	PEPE_0876	Uniprot_Pediococcus_pentosaceus_strain_ATCC.fasta	37204.5	1	11	12	30	0.000652	0.384	QVDVITLHVPALK	R	D	0.996	50.4	25	39.9	1432.85	3321.5	727625	197	209
sample Treatment	2022 5:30:55 PM;File Size: 1000722054 [Byte] (F057606)	D-lactate dehydrogenase, LdhA OS=Pediococcus pentosaceus (strain ATCC 25745 / CCUG 21536 / LMG 10740 / 183-1w) OX=278197 GN=PEPE_0876 PE=3 SV=1	Q03FT7_PEDPA	PEPE_0876	Uniprot_Pediococcus_pentosaceus_strain_ATCC.fasta	37204.5	1	11	12	30	0.000652	0.384	RIPEFDAK	R	M	0.936	30.1	25	30.1	975.526	2129	236053	119	126
sample Treatment	2022 5:30:55 PM;File Size: 1000722054 [Byte] (F057606)	D-lactate dehydrogenase, LdhA OS=Pediococcus pentosaceus (strain ATCC 25745 / CCUG 21536 / LMG 10740 / 183-1w) OX=278197 GN=PEPE_0876 PE=3 SV=1	Q03FT7_PEDPA	PEPE_0876	Uniprot_Pediococcus_pentosaceus_strain_ATCC.fasta	37204.5	1	11	12	30	0.000652	0.384	VIAYDVFR	K	N	0.99	52	25	52	982.536	3014	754007	170	177
sample Treatment	2022 5:30:55 PM;File Size: 1000722054 [Byte] (F057606)	Foldase protein PrsA OS=Pediococcus pentosaceus (strain ATCC 25745 / CCUG 21536 / LMG 10740 / 183-1w) OX=278197 GN=prsA PE=3 SV=1	PRSA_PEDPA	prsA	Uniprot_Pediococcus_pentosaceus_strain_ATCC.fasta	32508.9	1	8	11	27	0.000587	0.278	IAAFDDTNSTLDSSFK	K	K	0.997	128	25	128	1731.81	3025	439864	185	200
sample Treatment	2022 5:30:55 PM;File Size: 1000722054 [Byte] (F057606)	Foldase protein PrsA OS=Pediococcus pentosaceus (strain ATCC 25745 / CCUG 21536 / LMG 10740 / 183-1w) OX=278197 GN=prsA PE=3 SV=1	PRSA_PEDPA	prsA	Uniprot_Pediococcus_pentosaceus_strain_ATCC.fasta	32508.9	1	8	11	27	0.000587	0.278	IAAFDDTNSTLDSSFKK	K	A	0.996	50.5	25	50.5	1859.9	2796	239866	185	201
sample Treatment	2022 5:30:55 PM;File Size: 1000722054 [Byte] (F057606)	Foldase protein PrsA OS=Pediococcus pentosaceus (strain ATCC 25745 / CCUG 21536 / LMG 10740 / 183-1w) OX=278197 GN=prsA PE=3 SV=1	PRSA_PEDPA	prsA	Uniprot_Pediococcus_pentosaceus_strain_ATCC.fasta	32508.9	1	8	11	27	0.000587	0.278	ISNADLK	K	K	0.9	43	25	36.9	760.42	1506	220889	123	129
sample Treatment	2022 5:30:55 PM;File Size: 1000722054 [Byte] (F057606)	Foldase protein PrsA OS=Pediococcus pentosaceus (strain ATCC 25745 / CCUG 21536 / LMG 10740 / 183-1w) OX=278197 GN=prsA PE=3 SV=1	PRSA_PEDPA	prsA	Uniprot_Pediococcus_pentosaceus_strain_ATCC.fasta	32508.9	1	8	11	27	0.000587	0.278	IWNADMSDSTTLR	R	S	0.997	56.5	25	56.5	1509.7	2552.5	344310	247	259
sample Treatment	2022 5:30:55 PM;File Size: 1000722054 [Byte] (F057606)	Foldase protein PrsA OS=Pediococcus pentosaceus (strain ATCC 25745 / CCUG 21536 / LMG 10740 / 183-1w) OX=278197 GN=prsA PE=3 SV=1	PRSA_PEDPA	prsA	Uniprot_Pediococcus_pentosaceus_strain_ATCC.fasta	32508.9	1	8	11	27	0.000587	0.278	NVLDDYLGSSASSSTK	K	-	0.997	106	25	106	1643.78	2931	682785	280	295
sample Treatment	2022 5:30:55 PM;File Size: 1000722054 [Byte] (F057606)	Foldase protein PrsA OS=Pediococcus pentosaceus (strain ATCC 25745 / CCUG 21536 / LMG 10740 / 183-1w) OX=278197 GN=prsA PE=3 SV=1	PRSA_PEDPA	prsA	Uniprot_Pediococcus_pentosaceus_strain_ATCC.fasta	32508.9	1	8	11	27	0.000587	0.278	QVLQEMIVNK	K	V	0.997	58.4	25	58.4	1201.66	2701	537280	50	59
sample Treatment	2022 5:30:55 PM;File Size: 1000722054 [Byte] (F057606)	Foldase protein PrsA OS=Pediococcus pentosaceus (strain ATCC 25745 / CCUG 21536 / LMG 10740 / 183-1w) OX=278197 GN=prsA PE=3 SV=1	PRSA_PEDPA	prsA	Uniprot_Pediococcus_pentosaceus_strain_ATCC.fasta	32508.9	1	8	11	27	0.000587	0.278	TEYGYQVIK	K	M	0.944	30.7	25	30.7	1100.56	2362	460354	218	226
sample Treatment	2022 5:30:55 PM;File Size: 1000722054 [Byte] (F057606)	Foldase protein PrsA OS=Pediococcus pentosaceus (strain ATCC 25745 / CCUG 21536 / LMG 10740 / 183-1w) OX=278197 GN=prsA PE=3 SV=1	PRSA_PEDPA	prsA	Uniprot_Pediococcus_pentosaceus_strain_ATCC.fasta	32508.9	1	8	11	27	0.000587	0.278	VTVAQILVSK	K	K	0.997	66.1	25	66.1	1057.66	3118	1337540	139	148
sample Treatment	2022 5:30:55 PM;File Size: 1000722054 [Byte] (F057606)	ABC-type oligopeptide transport system, periplasmic component OS=Pediococcus pentosaceus (strain ATCC 25745 / CCUG 21536 / LMG 10740 / 183-1w) OX=278197 GN=PEPE_1584 PE=3 SV=1	Q03DW7_PEDPA	PEPE_1584	Uniprot_Pediococcus_pentosaceus_strain_ATCC.fasta	61780	1	29	40	146	0.00317	0.538	AEQIVMK	K	E	0.9	46.7	25	41.3	818.444	1795.5	1009760	499	505
sample Treatment	2022 5:30:55 PM;File Size: 1000722054 [Byte] (F057606)	ABC-type oligopeptide transport system, periplasmic component OS=Pediococcus pentosaceus (strain ATCC 25745 / CCUG 21536 / LMG 10740 / 183-1w) OX=278197 GN=PEPE_1584 PE=3 SV=1	Q03DW7_PEDPA	PEPE_1584	Uniprot_Pediococcus_pentosaceus_strain_ATCC.fasta	61780	1	29	40	146	0.00317	0.538	AFNNVNIR	K	K	0.99	43.9	25	43.9	947.506	2199.5	3235930	304	311
sample Treatment	2022 5:30:55 PM;File Size: 1000722054 [Byte] (F057606)	ABC-type oligopeptide transport system, periplasmic component OS=Pediococcus pentosaceus (strain ATCC 25745 / CCUG 21536 / LMG 10740 / 183-1w) OX=278197 GN=PEPE_1584 PE=3 SV=1	Q03DW7_PEDPA	PEPE_1584	Uniprot_Pediococcus_pentosaceus_strain_ATCC.fasta	61780	1	29	40	146	0.00317	0.538	AIAYSINR	K	K	0.99	41.5	25	35.5	907.5	2104.5	1492700	313	320
sample Treatment	2022 5:30:55 PM;File Size: 1000722054 [Byte] (F057606)	ABC-type oligopeptide transport system, periplasmic component OS=Pediococcus pentosaceus (strain ATCC 25745 / CCUG 21536 / LMG 10740 / 183-1w) OX=278197 GN=PEPE_1584 PE=3 SV=1	Q03DW7_PEDPA	PEPE_1584	Uniprot_Pediococcus_pentosaceus_strain_ATCC.fasta	61780	1	29	40	146	0.00317	0.538	ANGYGQTGNVFESLYR	K	L	0.997	93.8	25	93.8	1775.83	3354	543543	52	67
sample Treatment	2022 5:30:55 PM;File Size: 1000722054 [Byte] (F057606)	ABC-type oligopeptide transport system, periplasmic component OS=Pediococcus pentosaceus (strain ATCC 25745 / CCUG 21536 / LMG 10740 / 183-1w) OX=278197 GN=PEPE_1584 PE=3 SV=1	Q03DW7_PEDPA	PEPE_1584	Uniprot_Pediococcus_pentosaceus_strain_ATCC.fasta	61780	1	29	40	146	0.00317	0.538	AQYTVYSGPFK	K	V	0.997	59.1	25	59.1	1260.63	2741.5	2273690	200	210
sample Treatment	2022 5:30:55 PM;File Size: 1000722054 [Byte] (F057606)	ABC-type oligopeptide transport system, periplasmic component OS=Pediococcus pentosaceus (strain ATCC 25745 / CCUG 21536 / LMG 10740 / 183-1w) OX=278197 GN=PEPE_1584 PE=3 SV=1	Q03DW7_PEDPA	PEPE_1584	Uniprot_Pediococcus_pentosaceus_strain_ATCC.fasta	61780	1	29	40	146	0.00317	0.538	DDQTFVVHLDQPIQYFK	K	V	0.997	103	25	103	2093.03	3630	4936610	157	173
sample Treatment	2022 5:30:55 PM;File Size: 1000722054 [Byte] (F057606)	ABC-type oligopeptide transport system, periplasmic component OS=Pediococcus pentosaceus (strain ATCC 25745 / CCUG 21536 / LMG 10740 / 183-1w) OX=278197 GN=PEPE_1584 PE=3 SV=1	Q03DW7_PEDPA	PEPE_1584	Uniprot_Pediococcus_pentosaceus_strain_ATCC.fasta	61780	1	29	40	146	0.00317	0.538	DFADDAYLDGTIEYNQK	K	Q	0.997	103	25	103	1977.87	3154	476863	352	368
sample Treatment	2022 5:30:55 PM;File Size: 1000722054 [Byte] (F057606)	ABC-type oligopeptide transport system, periplasmic component OS=Pediococcus pentosaceus (strain ATCC 25745 / CCUG 21536 / LMG 10740 / 183-1w) OX=278197 GN=PEPE_1584 PE=3 SV=1	Q03DW7_PEDPA	PEPE_1584	Uniprot_Pediococcus_pentosaceus_strain_ATCC.fasta	61780	1	29	40	146	0.00317	0.538	DGLTWTFK	K	I	0.99	73.3	25	72.9	967.489	3237.5	2235270	87	94
sample Treatment	2022 5:30:55 PM;File Size: 1000722054 [Byte] (F057606)	ABC-type oligopeptide transport system, periplasmic component OS=Pediococcus pentosaceus (strain ATCC 25745 / CCUG 21536 / LMG 10740 / 183-1w) OX=278197 GN=PEPE_1584 PE=3 SV=1	Q03DW7_PEDPA	PEPE_1584	Uniprot_Pediococcus_pentosaceus_strain_ATCC.fasta	61780	1	29	40	146	0.00317	0.538	GGYAAEQTMNLAADAPLDTLDVSK	K	A	0.997	86.2	25	86.2	2451.17	3565	380391	28	51
sample Treatment	2022 5:30:55 PM;File Size: 1000722054 [Byte] (F057606)	ABC-type oligopeptide transport system, periplasmic component OS=Pediococcus pentosaceus (strain ATCC 25745 / CCUG 21536 / LMG 10740 / 183-1w) OX=278197 GN=PEPE_1584 PE=3 SV=1	Q03DW7_PEDPA	PEPE_1584	Uniprot_Pediococcus_pentosaceus_strain_ATCC.fasta	61780	1	29	40	146	0.00317	0.538	GLQEIGVK	K	N	0.99	62.3	25	62.3	843.494	2190.5	3125410	377	384
sample Treatment	2022 5:30:55 PM;File Size: 1000722054 [Byte] (F057606)	ABC-type oligopeptide transport system, periplasmic component OS=Pediococcus pentosaceus (strain ATCC 25745 / CCUG 21536 / LMG 10740 / 183-1w) OX=278197 GN=PEPE_1584 PE=3 SV=1	Q03DW7_PEDPA	PEPE_1584	Uniprot_Pediococcus_pentosaceus_strain_ATCC.fasta	61780	1	29	40	146	0.00317	0.538	GLVPTDLANNPK	K	T	0.997	62.5	25	62.5	1238.67	2592	6549570	337	348
sample Treatment	2022 5:30:55 PM;File Size: 1000722054 [Byte] (F057606)	ABC-type oligopeptide transport system, periplasmic component OS=Pediococcus pentosaceus (strain ATCC 25745 / CCUG 21536 / LMG 10740 / 183-1w) OX=278197 GN=PEPE_1584 PE=3 SV=1	Q03DW7_PEDPA	PEPE_1584	Uniprot_Pediococcus_pentosaceus_strain_ATCC.fasta	61780	1	29	40	146	0.00317	0.538	GVIHNTAGTQWNYK	K	Y	0.997	73.6	25	70.3	1588.79	2276.5	3889670	527	540
sample Treatment	2022 5:30:55 PM;File Size: 1000722054 [Byte] (F057606)	ABC-type oligopeptide transport system, periplasmic component OS=Pediococcus pentosaceus (strain ATCC 25745 / CCUG 21536 / LMG 10740 / 183-1w) OX=278197 GN=PEPE_1584 PE=3 SV=1	Q03DW7_PEDPA	PEPE_1584	Uniprot_Pediococcus_pentosaceus_strain_ATCC.fasta	61780	1	29	40	146	0.00317	0.538	GWTGTNDTWSFVK	K	N	0.997	76.4	25	76.4	1498.7	3304.5	2438320	213	225
sample Treatment	2022 5:30:55 PM;File Size: 1000722054 [Byte] (F057606)	ABC-type oligopeptide transport system, periplasmic component OS=Pediococcus pentosaceus (strain ATCC 25745 / CCUG 21536 / LMG 10740 / 183-1w) OX=278197 GN=PEPE_1584 PE=3 SV=1	Q03DW7_PEDPA	PEPE_1584	Uniprot_Pediococcus_pentosaceus_strain_ATCC.fasta	61780	1	29	40	146	0.00317	0.538	IIGDASTPSK	K	G	0.997	66.3	25	51	988.531	1594	4689580	327	336
sample Treatment	2022 5:30:55 PM;File Size: 1000722054 [Byte] (F057606)	ABC-type oligopeptide transport system, periplasmic component OS=Pediococcus pentosaceus (strain ATCC 25745 / CCUG 21536 / LMG 10740 / 183-1w) OX=278197 GN=PEPE_1584 PE=3 SV=1	Q03DW7_PEDPA	PEPE_1584	Uniprot_Pediococcus_pentosaceus_strain_ATCC.fasta	61780	1	29	40	146	0.00317	0.538	ITAHDFVYSWQR	K	T	0.997	63.2	25	63.2	1522.74	3023.5	8619220	107	118
sample Treatment	2022 5:30:55 PM;File Size: 1000722054 [Byte] (F057606)	ABC-type oligopeptide transport system, periplasmic component OS=Pediococcus pentosaceus (strain ATCC 25745 / CCUG 21536 / LMG 10740 / 183-1w) OX=278197 GN=PEPE_1584 PE=3 SV=1	Q03DW7_PEDPA	PEPE_1584	Uniprot_Pediococcus_pentosaceus_strain_ATCC.fasta	61780	1	29	40	146	0.00317	0.538	KAFNNVNIR	R	K	0.996	47.8	25	47.8	1075.6	1958.5	232222	303	311
sample Treatment	2022 5:30:55 PM;File Size: 1000722054 [Byte] (F057606)	ABC-type oligopeptide transport system, periplasmic component OS=Pediococcus pentosaceus (strain ATCC 25745 / CCUG 21536 / LMG 10740 / 183-1w) OX=278197 GN=PEPE_1584 PE=3 SV=1	Q03DW7_PEDPA	PEPE_1584	Uniprot_Pediococcus_pentosaceus_strain_ATCC.fasta	61780	1	29	40	146	0.00317	0.538	KGGYAAEQTMNLAADAPLDTLDVSK	K	A	0.997	78.3	25	78.3	2595.26	3396.5	722256	27	51
sample Treatment	2022 5:30:55 PM;File Size: 1000722054 [Byte] (F057606)	ABC-type oligopeptide transport system, periplasmic component OS=Pediococcus pentosaceus (strain ATCC 25745 / CCUG 21536 / LMG 10740 / 183-1w) OX=278197 GN=PEPE_1584 PE=3 SV=1	Q03DW7_PEDPA	PEPE_1584	Uniprot_Pediococcus_pentosaceus_strain_ATCC.fasta	61780	1	29	40	146	0.00317	0.538	LDYTQLSSEQVK	K	N	0.997	85.3	25	85.3	1410.71	2505.5	6888570	260	271
sample Treatment	2022 5:30:55 PM;File Size: 1000722054 [Byte] (F057606)	ABC-type oligopeptide transport system, periplasmic component OS=Pediococcus pentosaceus (strain ATCC 25745 / CCUG 21536 / LMG 10740 / 183-1w) OX=278197 GN=PEPE_1584 PE=3 SV=1	Q03DW7_PEDPA	PEPE_1584	Uniprot_Pediococcus_pentosaceus_strain_ATCC.fasta	61780	1	29	40	146	0.00317	0.538	LNLTSDNEGNSK	K	N	0.997	68.6	25	68.6	1291.61	1832	2899980	388	399
sample Treatment	2022 5:30:55 PM;File Size: 1000722054 [Byte] (F057606)	ABC-type oligopeptide transport system, periplasmic component OS=Pediococcus pentosaceus (strain ATCC 25745 / CCUG 21536 / LMG 10740 / 183-1w) OX=278197 GN=PEPE_1584 PE=3 SV=1	Q03DW7_PEDPA	PEPE_1584	Uniprot_Pediococcus_pentosaceus_strain_ATCC.fasta	61780	1	29	40	146	0.00317	0.538	LNLYQSGK	K	L	0.975	35.2	25	35.2	922.499	2056.5	2078650	252	259
sample Treatment	2022 5:30:55 PM;File Size: 1000722054 [Byte] (F057606)	ABC-type oligopeptide transport system, periplasmic component OS=Pediococcus pentosaceus (strain ATCC 25745 / CCUG 21536 / LMG 10740 / 183-1w) OX=278197 GN=PEPE_1584 PE=3 SV=1	Q03DW7_PEDPA	PEPE_1584	Uniprot_Pediococcus_pentosaceus_strain_ATCC.fasta	61780	1	29	40	146	0.00317	0.538	NADQINAGK	K	M	0.99	41.3	25	41.3	930.464	1156	549324	137	145
sample Treatment	2022 5:30:55 PM;File Size: 1000722054 [Byte] (F057606)	ABC-type oligopeptide transport system, periplasmic component OS=Pediococcus pentosaceus (strain ATCC 25745 / CCUG 21536 / LMG 10740 / 183-1w) OX=278197 GN=PEPE_1584 PE=3 SV=1	Q03DW7_PEDPA	PEPE_1584	Uniprot_Pediococcus_pentosaceus_strain_ATCC.fasta	61780	1	29	40	146	0.00317	0.538	NPQYWDK	K	K	0.9	34	25	34	950.437	1934.5	264273	226	232
sample Treatment	2022 5:30:55 PM;File Size: 1000722054 [Byte] (F057606)	ABC-type oligopeptide transport system, periplasmic component OS=Pediococcus pentosaceus (strain ATCC 25745 / CCUG 21536 / LMG 10740 / 183-1w) OX=278197 GN=PEPE_1584 PE=3 SV=1	Q03DW7_PEDPA	PEPE_1584	Uniprot_Pediococcus_pentosaceus_strain_ATCC.fasta	61780	1	29	40	146	0.00317	0.538	NPQYWDKK	K	V	0.99	46.3	25	46.3	1078.53	1703.5	147144	226	233
sample Treatment	2022 5:30:55 PM;File Size: 1000722054 [Byte] (F057606)	ABC-type oligopeptide transport system, periplasmic component OS=Pediococcus pentosaceus (strain ATCC 25745 / CCUG 21536 / LMG 10740 / 183-1w) OX=278197 GN=PEPE_1584 PE=3 SV=1	Q03DW7_PEDPA	PEPE_1584	Uniprot_Pediococcus_pentosaceus_strain_ATCC.fasta	61780	1	29	40	146	0.00317	0.538	NSAYNYGK	K	W	0.929	29.6	25	29.6	916.416	1362	187619	461	468
sample Treatment	2022 5:30:55 PM;File Size: 1000722054 [Byte] (F057606)	ABC-type oligopeptide transport system, periplasmic component OS=Pediococcus pentosaceus (strain ATCC 25745 / CCUG 21536 / LMG 10740 / 183-1w) OX=278197 GN=PEPE_1584 PE=3 SV=1	Q03DW7_PEDPA	PEPE_1584	Uniprot_Pediococcus_pentosaceus_strain_ATCC.fasta	61780	1	29	40	146	0.00317	0.538	NYAEFYAQSLEK	K	T	0.996	48.3	25	48.3	1462.68	2961.5	2466770	400	411
sample Treatment	2022 5:30:55 PM;File Size: 1000722054 [Byte] (F057606)	ABC-type oligopeptide transport system, periplasmic component OS=Pediococcus pentosaceus (strain ATCC 25745 / CCUG 21536 / LMG 10740 / 183-1w) OX=278197 GN=PEPE_1584 PE=3 SV=1	Q03DW7_PEDPA	PEPE_1584	Uniprot_Pediococcus_pentosaceus_strain_ATCC.fasta	61780	1	29	40	146	0.00317	0.538	TGKDFADDAYLDGTIEYNQK	K	Q	0.997	69.9	25	69.9	2264.04	2911	469550	349	368
sample Treatment	2022 5:30:55 PM;File Size: 1000722054 [Byte] (F057606)	ABC-type oligopeptide transport system, periplasmic component OS=Pediococcus pentosaceus (strain ATCC 25745 / CCUG 21536 / LMG 10740 / 183-1w) OX=278197 GN=PEPE_1584 PE=3 SV=1	Q03DW7_PEDPA	PEPE_1584	Uniprot_Pediococcus_pentosaceus_strain_ATCC.fasta	61780	1	29	40	146	0.00317	0.538	TTPGLASEAK	K	V	0.997	53.7	25	48.9	974.515	1666.5	3451660	74	83
sample Treatment	2022 5:30:55 PM;File Size: 1000722054 [Byte] (F057606)	ABC-type oligopeptide transport system, periplasmic component OS=Pediococcus pentosaceus (strain ATCC 25745 / CCUG 21536 / LMG 10740 / 183-1w) OX=278197 GN=PEPE_1584 PE=3 SV=1	Q03DW7_PEDPA	PEPE_1584	Uniprot_Pediococcus_pentosaceus_strain_ATCC.fasta	61780	1	29	40	146	0.00317	0.538	VLMSYPLFSPISQK	K	A	0.997	69.8	25	69.8	1609.87	3717.5	2832480	174	187
sample Treatment	2022 5:30:55 PM;File Size: 1000722054 [Byte] (F057606)	ABC-type oligopeptide transport system, periplasmic component OS=Pediococcus pentosaceus (strain ATCC 25745 / CCUG 21536 / LMG 10740 / 183-1w) OX=278197 GN=PEPE_1584 PE=3 SV=1	Q03DW7_PEDPA	PEPE_1584	Uniprot_Pediococcus_pentosaceus_strain_ATCC.fasta	61780	1	29	40	146	0.00317	0.538	WDNTEYNSLVK	K	K	0.997	59.3	25	54.4	1368.64	2714	3820610	469	479
sample Treatment	2022 5:30:55 PM;File Size: 1000722054 [Byte] (F057606)	Predicted ATP-grasp enzyme OS=Pediococcus pentosaceus (strain ATCC 25745 / CCUG 21536 / LMG 10740 / 183-1w) OX=278197 GN=PEPE_0661 PE=4 SV=1	Q03GE9_PEDPA	PEPE_0661	Uniprot_Pediococcus_pentosaceus_strain_ATCC.fasta	48603.4	1	5	6	12	0.000261	0.167	ETVYANDVPGNWK	R	L	0.969	34	25	34	1492.71	2687.5	253677	336	348
sample Treatment	2022 5:30:55 PM;File Size: 1000722054 [Byte] (F057606)	Predicted ATP-grasp enzyme OS=Pediococcus pentosaceus (strain ATCC 25745 / CCUG 21536 / LMG 10740 / 183-1w) OX=278197 GN=PEPE_0661 PE=4 SV=1	Q03GE9_PEDPA	PEPE_0661	Uniprot_Pediococcus_pentosaceus_strain_ATCC.fasta	48603.4	1	5	6	12	0.000261	0.167	FYSICDEYNLPYPATHFITK	R	A	0.997	62.6	25	62.6	2479.16	3582.5	491096	126	145
sample Treatment	2022 5:30:55 PM;File Size: 1000722054 [Byte] (F057606)	Predicted ATP-grasp enzyme OS=Pediococcus pentosaceus (strain ATCC 25745 / CCUG 21536 / LMG 10740 / 183-1w) OX=278197 GN=PEPE_0661 PE=4 SV=1	Q03GE9_PEDPA	PEPE_0661	Uniprot_Pediococcus_pentosaceus_strain_ATCC.fasta	48603.4	1	5	6	12	0.000261	0.167	TQAELDEVIGK	K	I	0.99	41	25	41	1202.63	2606	197135	188	198
sample Treatment	2022 5:30:55 PM;File Size: 1000722054 [Byte] (F057606)	Predicted ATP-grasp enzyme OS=Pediococcus pentosaceus (strain ATCC 25745 / CCUG 21536 / LMG 10740 / 183-1w) OX=278197 GN=PEPE_0661 PE=4 SV=1	Q03GE9_PEDPA	PEPE_0661	Uniprot_Pediococcus_pentosaceus_strain_ATCC.fasta	48603.4	1	5	6	12	0.000261	0.167	VLNAYVDQNHQVK	R	M	0.994	47.2	25	47.2	1527.79	2053	398365	223	235
sample Treatment	2022 5:30:55 PM;File Size: 1000722054 [Byte] (F057606)	Predicted ATP-grasp enzyme OS=Pediococcus pentosaceus (strain ATCC 25745 / CCUG 21536 / LMG 10740 / 183-1w) OX=278197 GN=PEPE_0661 PE=4 SV=1	Q03GE9_PEDPA	PEPE_0661	Uniprot_Pediococcus_pentosaceus_strain_ATCC.fasta	48603.4	1	5	6	12	0.000261	0.167	VQAYAGTVLAPTR	R	F	0.997	84.3	25	84.3	1346.74	2471.5	320461	34	46
sample Treatment	2022 5:30:55 PM;File Size: 1000722054 [Byte] (F057606)	Probable endonuclease 4 OS=Pediococcus pentosaceus (strain ATCC 25745 / CCUG 21536 / LMG 10740 / 183-1w) OX=278197 GN=nfo PE=3 SV=1	END4_PEDPA	nfo	Uniprot_Pediococcus_pentosaceus_strain_ATCC.fasta	32809.9	1	4	4	5	0.000109	0.132	DRHENLGFGTIGFK	K	A	0.996	49.3	25	49.3	1590.8	3002.5	143002	226	239
sample Treatment	2022 5:30:55 PM;File Size: 1000722054 [Byte] (F057606)	Probable endonuclease 4 OS=Pediococcus pentosaceus (strain ATCC 25745 / CCUG 21536 / LMG 10740 / 183-1w) OX=278197 GN=nfo PE=3 SV=1	END4_PEDPA	nfo	Uniprot_Pediococcus_pentosaceus_strain_ATCC.fasta	32809.9	1	4	4	5	0.000109	0.132	FAVEFLK	K	E	0.9	42.6	25	42.6	853.482	3224	46413.9	86	92
sample Treatment	2022 5:30:55 PM;File Size: 1000722054 [Byte] (F057606)	Probable endonuclease 4 OS=Pediococcus pentosaceus (strain ATCC 25745 / CCUG 21536 / LMG 10740 / 183-1w) OX=278197 GN=nfo PE=3 SV=1	END4_PEDPA	nfo	Uniprot_Pediococcus_pentosaceus_strain_ATCC.fasta	32809.9	1	4	4	5	0.000109	0.132	FDDTLIEK	R	I	0.981	36.7	25	34.4	980.494	2488	53764.4	285	292
sample Treatment	2022 5:30:55 PM;File Size: 1000722054 [Byte] (F057606)	Probable endonuclease 4 OS=Pediococcus pentosaceus (strain ATCC 25745 / CCUG 21536 / LMG 10740 / 183-1w) OX=278197 GN=nfo PE=3 SV=1	END4_PEDPA	nfo	Uniprot_Pediococcus_pentosaceus_strain_ATCC.fasta	32809.9	1	4	4	5	0.000109	0.132	IGVIHLNDSK	K	N	0.962	33	25	33	1095.62	2260	69228.5	209	218
sample Treatment	2022 5:30:55 PM;File Size: 1000722054 [Byte] (F057606)	DNA helicase OS=Pediococcus pentosaceus (strain ATCC 25745 / CCUG 21536 / LMG 10740 / 183-1w) OX=278197 GN=PEPE_0404 PE=4 SV=1	Q03H22_PEDPA	PEPE_0404	Uniprot_Pediococcus_pentosaceus_strain_ATCC.fasta	88422.9	1	10	10	18	0.000391	0.176	AGELPTVSINSSHQGMVEAVIEQLHR	R	D	0.997	38.6	25	38.6	2802.42	3768	54736.8	624	649
sample Treatment	2022 5:30:55 PM;File Size: 1000722054 [Byte] (F057606)	DNA helicase OS=Pediococcus pentosaceus (strain ATCC 25745 / CCUG 21536 / LMG 10740 / 183-1w) OX=278197 GN=PEPE_0404 PE=4 SV=1	Q03H22_PEDPA	PEPE_0404	Uniprot_Pediococcus_pentosaceus_strain_ATCC.fasta	88422.9	1	10	10	18	0.000391	0.176	APISSVYYDGK	R	M	0.996	49.9	25	49.9	1199.59	2307.5	168134	136	146
sample Treatment	2022 5:30:55 PM;File Size: 1000722054 [Byte] (F057606)	DNA helicase OS=Pediococcus pentosaceus (strain ATCC 25745 / CCUG 21536 / LMG 10740 / 183-1w) OX=278197 GN=PEPE_0404 PE=4 SV=1	Q03H22_PEDPA	PEPE_0404	Uniprot_Pediococcus_pentosaceus_strain_ATCC.fasta	88422.9	1	10	10	18	0.000391	0.176	GSLQFFK	K	A	0.9	31.3	25	31.3	826.446	2913.5	91315.2	326	332
sample Treatment	2022 5:30:55 PM;File Size: 1000722054 [Byte] (F057606)	DNA helicase OS=Pediococcus pentosaceus (strain ATCC 25745 / CCUG 21536 / LMG 10740 / 183-1w) OX=278197 GN=PEPE_0404 PE=4 SV=1	Q03H22_PEDPA	PEPE_0404	Uniprot_Pediococcus_pentosaceus_strain_ATCC.fasta	88422.9	1	10	10	18	0.000391	0.176	HLDEVLDKVDTAIAK	R	A	0.995	49	25	49	1666.9	2957	149285	12	26
sample Treatment	2022 5:30:55 PM;File Size: 1000722054 [Byte] (F057606)	DNA helicase OS=Pediococcus pentosaceus (strain ATCC 25745 / CCUG 21536 / LMG 10740 / 183-1w) OX=278197 GN=PEPE_0404 PE=4 SV=1	Q03H22_PEDPA	PEPE_0404	Uniprot_Pediococcus_pentosaceus_strain_ATCC.fasta	88422.9	1	10	10	18	0.000391	0.176	IPENLYIK	K	K	0.943	30.7	25	7.14	989.567	2611	69877.5	756	763
sample Treatment	2022 5:30:55 PM;File Size: 1000722054 [Byte] (F057606)	DNA helicase OS=Pediococcus pentosaceus (strain ATCC 25745 / CCUG 21536 / LMG 10740 / 183-1w) OX=278197 GN=PEPE_0404 PE=4 SV=1	Q03H22_PEDPA	PEPE_0404	Uniprot_Pediococcus_pentosaceus_strain_ATCC.fasta	88422.9	1	10	10	18	0.000391	0.176	IPNIDVENLQQR	R	F	0.997	60.4	25	60.4	1438.77	2854	153324	298	309
sample Treatment	2022 5:30:55 PM;File Size: 1000722054 [Byte] (F057606)	DNA helicase OS=Pediococcus pentosaceus (strain ATCC 25745 / CCUG 21536 / LMG 10740 / 183-1w) OX=278197 GN=PEPE_0404 PE=4 SV=1	Q03H22_PEDPA	PEPE_0404	Uniprot_Pediococcus_pentosaceus_strain_ATCC.fasta	88422.9	1	10	10	18	0.000391	0.176	MGDVEYATPDGTQTVDLK	K	L	0.997	62.8	25	62.8	1939.9	2738.5	43049.6	147	164
sample Treatment	2022 5:30:55 PM;File Size: 1000722054 [Byte] (F057606)	DNA helicase OS=Pediococcus pentosaceus (strain ATCC 25745 / CCUG 21536 / LMG 10740 / 183-1w) OX=278197 GN=PEPE_0404 PE=4 SV=1	Q03H22_PEDPA	PEPE_0404	Uniprot_Pediococcus_pentosaceus_strain_ATCC.fasta	88422.9	1	10	10	18	0.000391	0.176	NTAADLLFVQGAAGSGK	R	T	0.997	77.3	25	77.3	1619.84	3169.5	97044.4	220	236
sample Treatment	2022 5:30:55 PM;File Size: 1000722054 [Byte] (F057606)	DNA helicase OS=Pediococcus pentosaceus (strain ATCC 25745 / CCUG 21536 / LMG 10740 / 183-1w) OX=278197 GN=PEPE_0404 PE=4 SV=1	Q03H22_PEDPA	PEPE_0404	Uniprot_Pediococcus_pentosaceus_strain_ATCC.fasta	88422.9	1	10	10	18	0.000391	0.176	VAFLLYR	R	Y	0.9	31.2	25	31.2	881.524	3228.5	106876	244	250
sample Treatment	2022 5:30:55 PM;File Size: 1000722054 [Byte] (F057606)	DNA helicase OS=Pediococcus pentosaceus (strain ATCC 25745 / CCUG 21536 / LMG 10740 / 183-1w) OX=278197 GN=PEPE_0404 PE=4 SV=1	Q03H22_PEDPA	PEPE_0404	Uniprot_Pediococcus_pentosaceus_strain_ATCC.fasta	88422.9	1	10	10	18	0.000391	0.176	VGVTEAEWDNHVDK	K	V	0.996	51.5	25	51.5	1598.74	2357.5	228072	482	495
sample Treatment	2022 5:30:55 PM;File Size: 1000722054 [Byte] (F057606)	Predicted hydrolase of the HAD superfamily OS=Pediococcus pentosaceus (strain ATCC 25745 / CCUG 21536 / LMG 10740 / 183-1w) OX=278197 GN=PEPE_0311 PE=4 SV=1	Q03HB4_PEDPA	PEPE_0311	Uniprot_Pediococcus_pentosaceus_strain_ATCC.fasta	30547.5	0.996	1	1	2	4.35e-05	0.044	IDTHWTNLEDVR	K	E	0.996	50.8	25	50.8	1498.73	2831.5	92153	152	163
sample Treatment	2022 5:30:55 PM;File Size: 1000722054 [Byte] (F057606)	Rqc2 homolog RqcH OS=Pediococcus pentosaceus (strain ATCC 25745 / CCUG 21536 / LMG 10740 / 183-1w) OX=278197 GN=rqcH PE=3 SV=1	Q03FM0_PEDPA	rqcH	Uniprot_Pediococcus_pentosaceus_strain_ATCC.fasta	65155	1	5	5	6	0.00013	0.113	DIPGSHVIIESNQPSEK	K	T	0.987	39.7	25	39.7	1849.93	2400	87931.5	488	504
sample Treatment	2022 5:30:55 PM;File Size: 1000722054 [Byte] (F057606)	Rqc2 homolog RqcH OS=Pediococcus pentosaceus (strain ATCC 25745 / CCUG 21536 / LMG 10740 / 183-1w) OX=278197 GN=rqcH PE=3 SV=1	Q03FM0_PEDPA	rqcH	Uniprot_Pediococcus_pentosaceus_strain_ATCC.fasta	65155	1	5	5	6	0.00013	0.113	IINLHFAHR	R	N	0.986	39.1	25	39.1	1120.64	2448	53294.4	99	107
sample Treatment	2022 5:30:55 PM;File Size: 1000722054 [Byte] (F057606)	Rqc2 homolog RqcH OS=Pediococcus pentosaceus (strain ATCC 25745 / CCUG 21536 / LMG 10740 / 183-1w) OX=278197 GN=rqcH PE=3 SV=1	Q03FM0_PEDPA	rqcH	Uniprot_Pediococcus_pentosaceus_strain_ATCC.fasta	65155	1	5	5	6	0.00013	0.113	ISLSNQLSPSK	K	N	0.927	29.5	25	29.5	1173.65	2391	46959.1	361	371
sample Treatment	2022 5:30:55 PM;File Size: 1000722054 [Byte] (F057606)	Rqc2 homolog RqcH OS=Pediococcus pentosaceus (strain ATCC 25745 / CCUG 21536 / LMG 10740 / 183-1w) OX=278197 GN=rqcH PE=3 SV=1	Q03FM0_PEDPA	rqcH	Uniprot_Pediococcus_pentosaceus_strain_ATCC.fasta	65155	1	5	5	6	0.00013	0.113	IYQPYQGELVLTIR	K	V	0.937	30.2	25	30.2	1692.93	3469	61984.7	27	40
sample Treatment	2022 5:30:55 PM;File Size: 1000722054 [Byte] (F057606)	Rqc2 homolog RqcH OS=Pediococcus pentosaceus (strain ATCC 25745 / CCUG 21536 / LMG 10740 / 183-1w) OX=278197 GN=rqcH PE=3 SV=1	Q03FM0_PEDPA	rqcH	Uniprot_Pediococcus_pentosaceus_strain_ATCC.fasta	65155	1	5	5	6	0.00013	0.113	NSANVAVDYVQVR	R	N	0.997	65	25	62	1434.73	2586.5	106184	521	533
sample Treatment	2022 5:30:55 PM;File Size: 1000722054 [Byte] (F057606)	Cold-shock DNA-binding protein family OS=Pediococcus pentosaceus (strain ATCC 25745 / CCUG 21536 / LMG 10740 / 183-1w) OX=278197 GN=PEPE_1445 PE=4 SV=1	Q03E96_PEDPA	PEPE_1445	Uniprot_Pediococcus_pentosaceus_strain_ATCC.fasta	7284.7	1	5	7	56	0.00122	0.803	EDGSDVFVHFSAIQGDGFK	R	T	0.997	108	25	108	2054.95	3472	13895800	21	39
sample Treatment	2022 5:30:55 PM;File Size: 1000722054 [Byte] (F057606)	Cold-shock DNA-binding protein family OS=Pediococcus pentosaceus (strain ATCC 25745 / CCUG 21536 / LMG 10740 / 183-1w) OX=278197 GN=PEPE_1445 PE=4 SV=1	Q03E96_PEDPA	PEPE_1445	Uniprot_Pediococcus_pentosaceus_strain_ATCC.fasta	7284.7	1	5	7	56	0.00122	0.803	GFGFITR	K	E	0.9	40.9	25	40.9	797.431	2845	11656500	14	20
sample Treatment	2022 5:30:55 PM;File Size: 1000722054 [Byte] (F057606)	Cold-shock DNA-binding protein family OS=Pediococcus pentosaceus (strain ATCC 25745 / CCUG 21536 / LMG 10740 / 183-1w) OX=278197 GN=PEPE_1445 PE=4 SV=1	Q03E96_PEDPA	PEPE_1445	Uniprot_Pediococcus_pentosaceus_strain_ATCC.fasta	7284.7	1	5	7	56	0.00122	0.803	GPQAVNVNKN	R	-	0.996	49.3	25	49.3	1040.55	1356.5	372415	57	66
sample Treatment	2022 5:30:55 PM;File Size: 1000722054 [Byte] (F057606)	Cold-shock DNA-binding protein family OS=Pediococcus pentosaceus (strain ATCC 25745 / CCUG 21536 / LMG 10740 / 183-1w) OX=278197 GN=PEPE_1445 PE=4 SV=1	Q03E96_PEDPA	PEPE_1445	Uniprot_Pediococcus_pentosaceus_strain_ATCC.fasta	7284.7	1	5	7	56	0.00122	0.803	TLEEGQAVSFDVEESDR	K	G	0.997	113	25	113	1910.86	2822.5	292167	40	56
sample Treatment	2022 5:30:55 PM;File Size: 1000722054 [Byte] (F057606)	Cold-shock DNA-binding protein family OS=Pediococcus pentosaceus (strain ATCC 25745 / CCUG 21536 / LMG 10740 / 183-1w) OX=278197 GN=PEPE_1445 PE=4 SV=1	Q03E96_PEDPA	PEPE_1445	Uniprot_Pediococcus_pentosaceus_strain_ATCC.fasta	7284.7	1	5	7	56	0.00122	0.803	TLEEGQAVSFDVEESDRGPQAVNVNK	K	-	0.997	92.8	25	92.8	2818.35	2895.5	2499740	40	65
sample Treatment	2022 5:30:55 PM;File Size: 1000722054 [Byte] (F057606)	L-lactate dehydrogenase OS=Pediococcus pentosaceus (strain ATCC 25745 / CCUG 21536 / LMG 10740 / 183-1w) OX=278197 GN=ldh PE=3 SV=1	LDH_PEDPA	ldh	Uniprot_Pediococcus_pentosaceus_strain_ATCC.fasta	34285	1	11	13	34	0.000739	0.375	DADLVVITAGAPQKPGETR	K	L	0.997	85.3	25	85.3	1938.03	2667.5	590596	74	92
sample Treatment	2022 5:30:55 PM;File Size: 1000722054 [Byte] (F057606)	L-lactate dehydrogenase OS=Pediococcus pentosaceus (strain ATCC 25745 / CCUG 21536 / LMG 10740 / 183-1w) OX=278197 GN=ldh PE=3 SV=1	LDH_PEDPA	ldh	Uniprot_Pediococcus_pentosaceus_strain_ATCC.fasta	34285	1	11	13	34	0.000739	0.375	EEGVSTDELAEIEDSVR	K	N	0.997	116	25	116	1877.86	3412.5	330242	203	219
sample Treatment	2022 5:30:55 PM;File Size: 1000722054 [Byte] (F057606)	L-lactate dehydrogenase OS=Pediococcus pentosaceus (strain ATCC 25745 / CCUG 21536 / LMG 10740 / 183-1w) OX=278197 GN=ldh PE=3 SV=1	LDH_PEDPA	ldh	Uniprot_Pediococcus_pentosaceus_strain_ATCC.fasta	34285	1	11	13	34	0.000739	0.375	GATFYGVGTALMR	K	I	0.981	36.9	25	36.9	1343.68	3344	397968	230	242
sample Treatment	2022 5:30:55 PM;File Size: 1000722054 [Byte] (F057606)	L-lactate dehydrogenase OS=Pediococcus pentosaceus (strain ATCC 25745 / CCUG 21536 / LMG 10740 / 183-1w) OX=278197 GN=ldh PE=3 SV=1	LDH_PEDPA	ldh	Uniprot_Pediococcus_pentosaceus_strain_ATCC.fasta	34285	1	11	13	34	0.000739	0.375	KVLTDGLK	K	A	0.977	35.7	25	35.7	873.541	1804	43887.2	308	315
sample Treatment	2022 5:30:55 PM;File Size: 1000722054 [Byte] (F057606)	L-lactate dehydrogenase OS=Pediococcus pentosaceus (strain ATCC 25745 / CCUG 21536 / LMG 10740 / 183-1w) OX=278197 GN=ldh PE=3 SV=1	LDH_PEDPA	ldh	Uniprot_Pediococcus_pentosaceus_strain_ATCC.fasta	34285	1	11	13	34	0.000739	0.375	MTDSATTLK	K	K	0.984	38.1	25	38.1	967.477	1656.5	211855	299	307
sample Treatment	2022 5:30:55 PM;File Size: 1000722054 [Byte] (F057606)	L-lactate dehydrogenase OS=Pediococcus pentosaceus (strain ATCC 25745 / CCUG 21536 / LMG 10740 / 183-1w) OX=278197 GN=ldh PE=3 SV=1	LDH_PEDPA	ldh	Uniprot_Pediococcus_pentosaceus_strain_ATCC.fasta	34285	1	11	13	34	0.000739	0.375	NIYSGEYSDCKDADLVVITAGAPQKPGETR	K	L	0.979	36.5	25	36.5	3254.56	2952	613169	63	92
sample Treatment	2022 5:30:55 PM;File Size: 1000722054 [Byte] (F057606)	L-lactate dehydrogenase OS=Pediococcus pentosaceus (strain ATCC 25745 / CCUG 21536 / LMG 10740 / 183-1w) OX=278197 GN=ldh PE=3 SV=1	LDH_PEDPA	ldh	Uniprot_Pediococcus_pentosaceus_strain_ATCC.fasta	34285	1	11	13	34	0.000739	0.375	TVGDALDLEDATPFTAPK	R	N	0.997	107	25	107	1860.92	3437	794270	45	62
sample Treatment	2022 5:30:55 PM;File Size: 1000722054 [Byte] (F057606)	L-lactate dehydrogenase OS=Pediococcus pentosaceus (strain ATCC 25745 / CCUG 21536 / LMG 10740 / 183-1w) OX=278197 GN=ldh PE=3 SV=1	LDH_PEDPA	ldh	Uniprot_Pediococcus_pentosaceus_strain_ATCC.fasta	34285	1	11	13	34	0.000739	0.375	VIESPLSDDEMK	R	K	0.997	66.4	25	66.4	1362.65	2646.5	400197	286	297
sample Treatment	2022 5:30:55 PM;File Size: 1000722054 [Byte] (F057606)	L-lactate dehydrogenase OS=Pediococcus pentosaceus (strain ATCC 25745 / CCUG 21536 / LMG 10740 / 183-1w) OX=278197 GN=ldh PE=3 SV=1	LDH_PEDPA	ldh	Uniprot_Pediococcus_pentosaceus_strain_ATCC.fasta	34285	1	11	13	34	0.000739	0.375	VIESPLSDDEMKK	R	M	0.997	68.5	25	68.5	1490.74	2398	252163	286	298
sample Treatment	2022 5:30:55 PM;File Size: 1000722054 [Byte] (F057606)	L-lactate dehydrogenase OS=Pediococcus pentosaceus (strain ATCC 25745 / CCUG 21536 / LMG 10740 / 183-1w) OX=278197 GN=ldh PE=3 SV=1	LDH_PEDPA	ldh	Uniprot_Pediococcus_pentosaceus_strain_ATCC.fasta	34285	1	11	13	34	0.000739	0.375	VIGSGISLDSAR	K	L	0.997	92.7	25	92.7	1174.64	2565	1258390	144	155
sample Treatment	2022 5:30:55 PM;File Size: 1000722054 [Byte] (F057606)	L-lactate dehydrogenase OS=Pediococcus pentosaceus (strain ATCC 25745 / CCUG 21536 / LMG 10740 / 183-1w) OX=278197 GN=ldh PE=3 SV=1	LDH_PEDPA	ldh	Uniprot_Pediococcus_pentosaceus_strain_ATCC.fasta	34285	1	11	13	34	0.000739	0.375	VLTDGLK	K	A	0.9	39.8	25	35.7	745.446	1978.5	314215	309	315
sample Treatment	2022 5:30:55 PM;File Size: 1000722054 [Byte] (F057606)	Transcriptional regulator OS=Pediococcus pentosaceus (strain ATCC 25745 / CCUG 21536 / LMG 10740 / 183-1w) OX=278197 GN=PEPE_1648 PE=4 SV=1	Q03DQ3_PEDPA	PEPE_1648	Uniprot_Pediococcus_pentosaceus_strain_ATCC.fasta	16751.5	0.434	1	1	1	2.17e-05	0.0612	LIGTLLESK	K	M	0.936	30.1	25	30.1	973.593	2847	47072.9	19	27
sample Treatment	2022 5:30:55 PM;File Size: 1000722054 [Byte] (F057606)	Protein translocase subunit yajC OS=Pediococcus pentosaceus (strain ATCC 25745 / CCUG 21536 / LMG 10740 / 183-1w) OX=278197 GN=PEPE_1268 PE=3 SV=1	Q03ER3_PEDPA	PEPE_1268	Uniprot_Pediococcus_pentosaceus_strain_ATCC.fasta	14091.4	1	4	5	10	0.000217	0.395	ALTTTETTETK	K	E	0.997	61.2	25	61.2	1195.61	1533	88133.4	96	106
sample Treatment	2022 5:30:55 PM;File Size: 1000722054 [Byte] (F057606)	Protein translocase subunit yajC OS=Pediococcus pentosaceus (strain ATCC 25745 / CCUG 21536 / LMG 10740 / 183-1w) OX=278197 GN=PEPE_1268 PE=3 SV=1	Q03ER3_PEDPA	PEPE_1268	Uniprot_Pediococcus_pentosaceus_strain_ATCC.fasta	14091.4	1	4	5	10	0.000217	0.395	ALTTTETTETKEEAPVK	K	E	0.997	52.8	25	52.8	1848.94	1910.5	195215	96	112
sample Treatment	2022 5:30:55 PM;File Size: 1000722054 [Byte] (F057606)	Protein translocase subunit yajC OS=Pediococcus pentosaceus (strain ATCC 25745 / CCUG 21536 / LMG 10740 / 183-1w) OX=278197 GN=PEPE_1268 PE=3 SV=1	Q03ER3_PEDPA	PEPE_1268	Uniprot_Pediococcus_pentosaceus_strain_ATCC.fasta	14091.4	1	4	5	10	0.000217	0.395	LHGVVDSINEEEK	R	T	0.997	58.6	25	58.6	1468.73	2153.5	375013	59	71
sample Treatment	2022 5:30:55 PM;File Size: 1000722054 [Byte] (F057606)	Protein translocase subunit yajC OS=Pediococcus pentosaceus (strain ATCC 25745 / CCUG 21536 / LMG 10740 / 183-1w) OX=278197 GN=PEPE_1268 PE=3 SV=1	Q03ER3_PEDPA	PEPE_1268	Uniprot_Pediococcus_pentosaceus_strain_ATCC.fasta	14091.4	1	4	5	10	0.000217	0.395	RQEMMNQLNVGDNVVTIGR	K	L	0.997	55.5	25	55.5	2174.08	3039.5	120636	40	58
sample Treatment	2022 5:30:55 PM;File Size: 1000722054 [Byte] (F057606)	DNA topoisomerase 1 OS=Pediococcus pentosaceus (strain ATCC 25745 / CCUG 21536 / LMG 10740 / 183-1w) OX=278197 GN=topA PE=3 SV=1	Q03FK1_PEDPA	topA	Uniprot_Pediococcus_pentosaceus_strain_ATCC.fasta	78935	1	3	3	5	0.000109	0.0928	DKDNVLPNLEEGDQVQLVTNNPNQHFTQPPAR	K	Y	0.997	44.4	25	44.4	3627.78	3160.5	136661	427	458
sample Treatment	2022 5:30:55 PM;File Size: 1000722054 [Byte] (F057606)	DNA topoisomerase 1 OS=Pediococcus pentosaceus (strain ATCC 25745 / CCUG 21536 / LMG 10740 / 183-1w) OX=278197 GN=topA PE=3 SV=1	Q03FK1_PEDPA	topA	Uniprot_Pediococcus_pentosaceus_strain_ATCC.fasta	78935	1	3	3	5	0.000109	0.0928	MGVDLENDYEPHYISIR	K	G	0.994	45.9	25	45.9	2050.95	3195	85112.6	45	61
sample Treatment	2022 5:30:55 PM;File Size: 1000722054 [Byte] (F057606)	DNA topoisomerase 1 OS=Pediococcus pentosaceus (strain ATCC 25745 / CCUG 21536 / LMG 10740 / 183-1w) OX=278197 GN=topA PE=3 SV=1	Q03FK1_PEDPA	topA	Uniprot_Pediococcus_pentosaceus_strain_ATCC.fasta	78935	1	3	3	5	0.000109	0.0928	YPDCDFVSWDKPIAR	R	E	0.986	39	25	39	1868.86	3115.5	140035	643	657
sample Treatment	2022 5:30:55 PM;File Size: 1000722054 [Byte] (F057606)	Methionine aminopeptidase OS=Pediococcus pentosaceus (strain ATCC 25745 / CCUG 21536 / LMG 10740 / 183-1w) OX=278197 GN=map PE=3 SV=1	Q03H51_PEDPA	map	Uniprot_Pediococcus_pentosaceus_strain_ATCC.fasta	28406.1	0.999	1	1	2	4.35e-05	0.0462	ILTSQDPVEDAK	K	Y	0.997	59	25	59	1315.67	2141.5	194675	247	258
sample Treatment	2022 5:30:55 PM;File Size: 1000722054 [Byte] (F057606)	50S ribosomal protein L2 OS=Pediococcus pentosaceus (strain ATCC 25745 / CCUG 21536 / LMG 10740 / 183-1w) OX=278197 GN=rplB PE=3 SV=1	RL2_PEDPA	rplB	Uniprot_Pediococcus_pentosaceus_strain_ATCC.fasta	30689.2	1	15	26	81	0.00176	0.564	AIEYDPNR	K	T	0.977	35.6	25	35.6	977.469	1781	1192060	80	87
sample Treatment	2022 5:30:55 PM;File Size: 1000722054 [Byte] (F057606)	50S ribosomal protein L2 OS=Pediococcus pentosaceus (strain ATCC 25745 / CCUG 21536 / LMG 10740 / 183-1w) OX=278197 GN=rplB PE=3 SV=1	RL2_PEDPA	rplB	Uniprot_Pediococcus_pentosaceus_strain_ATCC.fasta	30689.2	1	15	26	81	0.00176	0.564	ATIGAVGNEEHELVNVGK	R	A	0.997	118	25	118	1836.95	2748	4150770	190	207
sample Treatment	2022 5:30:55 PM;File Size: 1000722054 [Byte] (F057606)	50S ribosomal protein L2 OS=Pediococcus pentosaceus (strain ATCC 25745 / CCUG 21536 / LMG 10740 / 183-1w) OX=278197 GN=rplB PE=3 SV=1	RL2_PEDPA	rplB	Uniprot_Pediococcus_pentosaceus_strain_ATCC.fasta	30689.2	1	15	26	81	0.00176	0.564	DIPVGTVIHNIELKPGK	K	G	0.997	46	25	46	1830.05	3241.5	5110270	134	150
sample Treatment	2022 5:30:55 PM;File Size: 1000722054 [Byte] (F057606)	50S ribosomal protein L2 OS=Pediococcus pentosaceus (strain ATCC 25745 / CCUG 21536 / LMG 10740 / 183-1w) OX=278197 GN=rplB PE=3 SV=1	RL2_PEDPA	rplB	Uniprot_Pediococcus_pentosaceus_strain_ATCC.fasta	30689.2	1	15	26	81	0.00176	0.564	GMTQLDYSEITK	R	K	0.997	57.8	25	57.8	1385.66	2729	840097	15	26
sample Treatment	2022 5:30:55 PM;File Size: 1000722054 [Byte] (F057606)	50S ribosomal protein L2 OS=Pediococcus pentosaceus (strain ATCC 25745 / CCUG 21536 / LMG 10740 / 183-1w) OX=278197 GN=rplB PE=3 SV=1	RL2_PEDPA	rplB	Uniprot_Pediococcus_pentosaceus_strain_ATCC.fasta	30689.2	1	15	26	81	0.00176	0.564	GSVMNPNDHPHGGGEGK	R	A	0.997	48.6	25	48.6	1689.74	1370	2193430	222	238
sample Treatment	2022 5:30:55 PM;File Size: 1000722054 [Byte] (F057606)	50S ribosomal protein L2 OS=Pediococcus pentosaceus (strain ATCC 25745 / CCUG 21536 / LMG 10740 / 183-1w) OX=278197 GN=rplB PE=3 SV=1	RL2_PEDPA	rplB	Uniprot_Pediococcus_pentosaceus_strain_ATCC.fasta	30689.2	1	15	26	81	0.00176	0.564	IKDDVPATVK	R	A	0.997	50.8	25	37.6	1085.62	1778	3439370	70	79
sample Treatment	2022 5:30:55 PM;File Size: 1000722054 [Byte] (F057606)	50S ribosomal protein L2 OS=Pediococcus pentosaceus (strain ATCC 25745 / CCUG 21536 / LMG 10740 / 183-1w) OX=278197 GN=rplB PE=3 SV=1	RL2_PEDPA	rplB	Uniprot_Pediococcus_pentosaceus_strain_ATCC.fasta	30689.2	1	15	26	81	0.00176	0.564	LASSEVR	R	M	0.9	50.9	25	40	761.415	1264	714769	176	182
sample Treatment	2022 5:30:55 PM;File Size: 1000722054 [Byte] (F057606)	50S ribosomal protein L2 OS=Pediococcus pentosaceus (strain ATCC 25745 / CCUG 21536 / LMG 10740 / 183-1w) OX=278197 GN=rplB PE=3 SV=1	RL2_PEDPA	rplB	Uniprot_Pediococcus_pentosaceus_strain_ATCC.fasta	30689.2	1	15	26	81	0.00176	0.564	MVLATNR	R	A	0.9	29.8	25	29.2	804.44	1781	438199	183	189
sample Treatment	2022 5:30:55 PM;File Size: 1000722054 [Byte] (F057606)	50S ribosomal protein L2 OS=Pediococcus pentosaceus (strain ATCC 25745 / CCUG 21536 / LMG 10740 / 183-1w) OX=278197 GN=rplB PE=3 SV=1	RL2_PEDPA	rplB	Uniprot_Pediococcus_pentosaceus_strain_ATCC.fasta	30689.2	1	15	26	81	0.00176	0.564	RGMTQLDYSEITK	R	K	0.98	36.9	25	36.9	1557.76	2437	976596	14	26
sample Treatment	2022 5:30:55 PM;File Size: 1000722054 [Byte] (F057606)	50S ribosomal protein L2 OS=Pediococcus pentosaceus (strain ATCC 25745 / CCUG 21536 / LMG 10740 / 183-1w) OX=278197 GN=rplB PE=3 SV=1	RL2_PEDPA	rplB	Uniprot_Pediococcus_pentosaceus_strain_ATCC.fasta	30689.2	1	15	26	81	0.00176	0.564	SAGASAQLLGK	R	E	0.997	80.5	25	73	1002.56	2054.5	3499860	157	167
sample Treatment	2022 5:30:55 PM;File Size: 1000722054 [Byte] (F057606)	50S ribosomal protein L2 OS=Pediococcus pentosaceus (strain ATCC 25745 / CCUG 21536 / LMG 10740 / 183-1w) OX=278197 GN=rplB PE=3 SV=1	RL2_PEDPA	rplB	Uniprot_Pediococcus_pentosaceus_strain_ATCC.fasta	30689.2	1	15	26	81	0.00176	0.564	SLLESQSHTAGR	K	N	0.997	82.2	25	82.2	1285.65	1736	3211040	32	43
sample Treatment	2022 5:30:55 PM;File Size: 1000722054 [Byte] (F057606)	50S ribosomal protein L2 OS=Pediococcus pentosaceus (strain ATCC 25745 / CCUG 21536 / LMG 10740 / 183-1w) OX=278197 GN=rplB PE=3 SV=1	RL2_PEDPA	rplB	Uniprot_Pediococcus_pentosaceus_strain_ATCC.fasta	30689.2	1	15	26	81	0.00176	0.564	SYIIAPK	K	G	0.9	41.5	25	41.5	791.466	2160.5	1315560	102	108
sample Treatment	2022 5:30:55 PM;File Size: 1000722054 [Byte] (F057606)	50S ribosomal protein L2 OS=Pediococcus pentosaceus (strain ATCC 25745 / CCUG 21536 / LMG 10740 / 183-1w) OX=278197 GN=rplB PE=3 SV=1	RL2_PEDPA	rplB	Uniprot_Pediococcus_pentosaceus_strain_ATCC.fasta	30689.2	1	15	26	81	0.00176	0.564	TANIALLVYADGVK	R	S	0.997	74.8	25	74.8	1447.82	3577	1480810	88	101
sample Treatment	2022 5:30:55 PM;File Size: 1000722054 [Byte] (F057606)	50S ribosomal protein L2 OS=Pediococcus pentosaceus (strain ATCC 25745 / CCUG 21536 / LMG 10740 / 183-1w) OX=278197 GN=rplB PE=3 SV=1	RL2_PEDPA	rplB	Uniprot_Pediococcus_pentosaceus_strain_ATCC.fasta	30689.2	1	15	26	81	0.00176	0.564	VGNALPLK	K	D	0.99	67.4	25	67.4	811.504	2155	401329	126	133
sample Treatment	2022 5:30:55 PM;File Size: 1000722054 [Byte] (F057606)	50S ribosomal protein L2 OS=Pediococcus pentosaceus (strain ATCC 25745 / CCUG 21536 / LMG 10740 / 183-1w) OX=278197 GN=rplB PE=3 SV=1	RL2_PEDPA	rplB	Uniprot_Pediococcus_pentosaceus_strain_ATCC.fasta	30689.2	1	15	26	81	0.00176	0.564	VQSGSEADIK	K	V	0.997	71.5	25	71.5	1033.52	1382	943933	116	125
sample Treatment	2022 5:30:55 PM;File Size: 1000722054 [Byte] (F057606)	Membrane carboxypeptidase (Penicillin-binding protein) OS=Pediococcus pentosaceus (strain ATCC 25745 / CCUG 21536 / LMG 10740 / 183-1w) OX=278197 GN=PEPE_0672 PE=4 SV=1	Q03GD9_PEDPA	PEPE_0672	Uniprot_Pediococcus_pentosaceus_strain_ATCC.fasta	78242.3	1	3	3	7	0.000152	0.06	DYISGGGSTLTQQLVK	R	N	0.997	57.6	25	57.6	1666.86	2968	67293.3	149	164
sample Treatment	2022 5:30:55 PM;File Size: 1000722054 [Byte] (F057606)	Membrane carboxypeptidase (Penicillin-binding protein) OS=Pediococcus pentosaceus (strain ATCC 25745 / CCUG 21536 / LMG 10740 / 183-1w) OX=278197 GN=PEPE_0672 PE=4 SV=1	Q03GD9_PEDPA	PEPE_0672	Uniprot_Pediococcus_pentosaceus_strain_ATCC.fasta	78242.3	1	3	3	7	0.000152	0.06	IVDASGNTIVNNTTESK	K	R	0.997	69.4	25	69.4	1762.88	2138	62340.4	530	546
sample Treatment	2022 5:30:55 PM;File Size: 1000722054 [Byte] (F057606)	Membrane carboxypeptidase (Penicillin-binding protein) OS=Pediococcus pentosaceus (strain ATCC 25745 / CCUG 21536 / LMG 10740 / 183-1w) OX=278197 GN=PEPE_0672 PE=4 SV=1	Q03GD9_PEDPA	PEPE_0672	Uniprot_Pediococcus_pentosaceus_strain_ATCC.fasta	78242.3	1	3	3	7	0.000152	0.06	NAPAVWLLNK	K	I	0.982	37.1	25	37.1	1125.64	3220	115170	459	468
sample Treatment	2022 5:30:55 PM;File Size: 1000722054 [Byte] (F057606)	Cell wall-associated hydrolase with LysM domain OS=Pediococcus pentosaceus (strain ATCC 25745 / CCUG 21536 / LMG 10740 / 183-1w) OX=278197 GN=PEPE_1163 PE=3 SV=1	Q03F05_PEDPA	PEPE_1163	Uniprot_Pediococcus_pentosaceus_strain_ATCC.fasta	48377	1	4	4	7	0.000152	0.137	SGDSLSVLAEK	K	Y	0.997	88.9	25	88.9	1105.57	2522.5	207242	95	105
sample Treatment	2022 5:30:55 PM;File Size: 1000722054 [Byte] (F057606)	Cell wall-associated hydrolase with LysM domain OS=Pediococcus pentosaceus (strain ATCC 25745 / CCUG 21536 / LMG 10740 / 183-1w) OX=278197 GN=PEPE_1163 PE=3 SV=1	Q03F05_PEDPA	PEPE_1163	Uniprot_Pediococcus_pentosaceus_strain_ATCC.fasta	48377	1	4	4	7	0.000152	0.137	SIESLNNINQNSHLIFVGQDINIPGK	K	T	0.997	74	25	74	2864.49	3582	131113	58	83
sample Treatment	2022 5:30:55 PM;File Size: 1000722054 [Byte] (F057606)	Cell wall-associated hydrolase with LysM domain OS=Pediococcus pentosaceus (strain ATCC 25745 / CCUG 21536 / LMG 10740 / 183-1w) OX=278197 GN=PEPE_1163 PE=3 SV=1	Q03F05_PEDPA	PEPE_1163	Uniprot_Pediococcus_pentosaceus_strain_ATCC.fasta	48377	1	4	4	7	0.000152	0.137	SLANNTIPYVWGGK	R	T	0.963	32.9	25	32.9	1519.79	3258	84767.2	387	400
sample Treatment	2022 5:30:55 PM;File Size: 1000722054 [Byte] (F057606)	Cell wall-associated hydrolase with LysM domain OS=Pediococcus pentosaceus (strain ATCC 25745 / CCUG 21536 / LMG 10740 / 183-1w) OX=278197 GN=PEPE_1163 PE=3 SV=1	Q03F05_PEDPA	PEPE_1163	Uniprot_Pediococcus_pentosaceus_strain_ATCC.fasta	48377	1	4	4	7	0.000152	0.137	VSTISSYFYPSFAGSVR	K	-	0.997	56.1	25	56.1	1867.92	3645.5	93822.1	480	496
sample Treatment	2022 5:30:55 PM;File Size: 1000722054 [Byte] (F057606)	GTPase Era OS=Pediococcus pentosaceus (strain ATCC 25745 / CCUG 21536 / LMG 10740 / 183-1w) OX=278197 GN=era PE=3 SV=1	ERA_PEDPA	era	Uniprot_Pediococcus_pentosaceus_strain_ATCC.fasta	34341.4	1	8	8	13	0.000283	0.276	EQIVFIDTPGIHK	R	S	0.996	50.7	25	50.7	1496.81	2976	86521.4	58	70
sample Treatment	2022 5:30:55 PM;File Size: 1000722054 [Byte] (F057606)	GTPase Era OS=Pediococcus pentosaceus (strain ATCC 25745 / CCUG 21536 / LMG 10740 / 183-1w) OX=278197 GN=era PE=3 SV=1	ERA_PEDPA	era	Uniprot_Pediococcus_pentosaceus_strain_ATCC.fasta	34341.4	1	8	8	13	0.000283	0.276	FVVSELIR	R	E	0.99	43.7	25	43.7	962.567	3245	71266.7	194	201
sample Treatment	2022 5:30:55 PM;File Size: 1000722054 [Byte] (F057606)	GTPase Era OS=Pediococcus pentosaceus (strain ATCC 25745 / CCUG 21536 / LMG 10740 / 183-1w) OX=278197 GN=era PE=3 SV=1	ERA_PEDPA	era	Uniprot_Pediococcus_pentosaceus_strain_ATCC.fasta	34341.4	1	8	8	13	0.000283	0.276	GAGDNYIIER	R	L	0.997	63.5	25	58.4	1107.54	2218	143520	104	113
sample Treatment	2022 5:30:55 PM;File Size: 1000722054 [Byte] (F057606)	GTPase Era OS=Pediococcus pentosaceus (strain ATCC 25745 / CCUG 21536 / LMG 10740 / 183-1w) OX=278197 GN=era PE=3 SV=1	ERA_PEDPA	era	Uniprot_Pediococcus_pentosaceus_strain_ATCC.fasta	34341.4	1	8	8	13	0.000283	0.276	IQGIYTTDR	K	E	0.932	29.9	25	29.9	1066.55	2035	127174	49	57
sample Treatment	2022 5:30:55 PM;File Size: 1000722054 [Byte] (F057606)	GTPase Era OS=Pediococcus pentosaceus (strain ATCC 25745 / CCUG 21536 / LMG 10740 / 183-1w) OX=278197 GN=era PE=3 SV=1	ERA_PEDPA	era	Uniprot_Pediococcus_pentosaceus_strain_ATCC.fasta	34341.4	1	8	8	13	0.000283	0.276	STFLNYVIGQK	K	V	0.987	39.1	25	33.3	1269.68	3496.5	188802	24	34
sample Treatment	2022 5:30:55 PM;File Size: 1000722054 [Byte] (F057606)	GTPase Era OS=Pediococcus pentosaceus (strain ATCC 25745 / CCUG 21536 / LMG 10740 / 183-1w) OX=278197 GN=era PE=3 SV=1	ERA_PEDPA	era	Uniprot_Pediococcus_pentosaceus_strain_ATCC.fasta	34341.4	1	8	8	13	0.000283	0.276	VAIMSNVPQTTR	K	N	0.989	40.6	25	40.6	1316.7	2363.5	161109	35	46
sample Treatment	2022 5:30:55 PM;File Size: 1000722054 [Byte] (F057606)	GTPase Era OS=Pediococcus pentosaceus (strain ATCC 25745 / CCUG 21536 / LMG 10740 / 183-1w) OX=278197 GN=era PE=3 SV=1	ERA_PEDPA	era	Uniprot_Pediococcus_pentosaceus_strain_ATCC.fasta	34341.4	1	8	8	13	0.000283	0.276	VYLELWVK	R	V	0.942	30.6	25	30.6	1049.6	3581.5	104244	275	282
sample Treatment	2022 5:30:55 PM;File Size: 1000722054 [Byte] (F057606)	GTPase Era OS=Pediococcus pentosaceus (strain ATCC 25745 / CCUG 21536 / LMG 10740 / 183-1w) OX=278197 GN=era PE=3 SV=1	ERA_PEDPA	era	Uniprot_Pediococcus_pentosaceus_strain_ATCC.fasta	34341.4	1	8	8	13	0.000283	0.276	YYPDDQVTDHPER	K	F	0.996	51	25	51	1634.71	1918	268526	181	193
sample Treatment	2022 5:30:55 PM;File Size: 1000722054 [Byte] (F057606)	Inorganic diphosphatase OS=Pediococcus pentosaceus (strain ATCC 25745 / CCUG 21536 / LMG 10740 / 183-1w) OX=278197 GN=PEPE_0956 PE=4 SV=1	Q03FL0_PEDPA	PEPE_0956	Uniprot_Pediococcus_pentosaceus_strain_ATCC.fasta	33660.1	1	3	3	4	8.7e-05	0.158	AFNTELSDHNTADLPGVVSR	K	K	0.997	67.1	25	67.1	2143.04	2878	111091	278	297
sample Treatment	2022 5:30:55 PM;File Size: 1000722054 [Byte] (F057606)	Inorganic diphosphatase OS=Pediococcus pentosaceus (strain ATCC 25745 / CCUG 21536 / LMG 10740 / 183-1w) OX=278197 GN=PEPE_0956 PE=4 SV=1	Q03FL0_PEDPA	PEPE_0956	Uniprot_Pediococcus_pentosaceus_strain_ATCC.fasta	33660.1	1	3	3	4	8.7e-05	0.158	QLVFGHSNPDTDAIVAAK	K	A	0.993	44.4	25	44.4	1882.97	2752.5	370047	4	21
sample Treatment	2022 5:30:55 PM;File Size: 1000722054 [Byte] (F057606)	Inorganic diphosphatase OS=Pediococcus pentosaceus (strain ATCC 25745 / CCUG 21536 / LMG 10740 / 183-1w) OX=278197 GN=PEPE_0956 PE=4 SV=1	Q03FL0_PEDPA	PEPE_0956	Uniprot_Pediococcus_pentosaceus_strain_ATCC.fasta	33660.1	1	3	3	4	8.7e-05	0.158	SELELVDGDAK	K	S	0.981	36.8	25	36.8	1175.58	2496	151243	196	206
sample Treatment	2022 5:30:55 PM;File Size: 1000722054 [Byte] (F057606)	Lipid II isoglutaminyl synthase (glutamine-hydrolyzing) subunit MurT OS=Pediococcus pentosaceus (strain ATCC 25745 / CCUG 21536 / LMG 10740 / 183-1w) OX=278197 GN=murT PE=3 SV=1	Q03EJ9_PEDPA	murT	Uniprot_Pediococcus_pentosaceus_strain_ATCC.fasta	50349.4	0.997	2	2	3	6.52e-05	0.0469	ADPNTDGVVCPR	K	C	0.975	35.2	25	35.2	1300.6	1849.5	60159	197	208
sample Treatment	2022 5:30:55 PM;File Size: 1000722054 [Byte] (F057606)	Lipid II isoglutaminyl synthase (glutamine-hydrolyzing) subunit MurT OS=Pediococcus pentosaceus (strain ATCC 25745 / CCUG 21536 / LMG 10740 / 183-1w) OX=278197 GN=murT PE=3 SV=1	Q03EJ9_PEDPA	murT	Uniprot_Pediococcus_pentosaceus_strain_ATCC.fasta	50349.4	0.997	2	2	3	6.52e-05	0.0469	QEQINVDGK	R	E	0.958	32.3	25	32.3	1030.52	1714	30651.2	307	315
sample Treatment	2022 5:30:55 PM;File Size: 1000722054 [Byte] (F057606)	Proline--tRNA ligase OS=Pediococcus pentosaceus (strain ATCC 25745 / CCUG 21536 / LMG 10740 / 183-1w) OX=278197 GN=proS PE=3 SV=1	SYP_PEDPA	proS	Uniprot_Pediococcus_pentosaceus_strain_ATCC.fasta	64008.2	1	15	17	32	0.000696	0.313	AGYDVLVDDR	K	K	0.997	51.8	25	51.8	1122.54	2579	301559	501	510
sample Treatment	2022 5:30:55 PM;File Size: 1000722054 [Byte] (F057606)	Proline--tRNA ligase OS=Pediococcus pentosaceus (strain ATCC 25745 / CCUG 21536 / LMG 10740 / 183-1w) OX=278197 GN=proS PE=3 SV=1	SYP_PEDPA	proS	Uniprot_Pediococcus_pentosaceus_strain_ATCC.fasta	64008.2	1	15	17	32	0.000696	0.313	AYQNIFR	K	R	0.9	34.8	25	34.8	911.473	2536.5	237162	180	186
sample Treatment	2022 5:30:55 PM;File Size: 1000722054 [Byte] (F057606)	Proline--tRNA ligase OS=Pediococcus pentosaceus (strain ATCC 25745 / CCUG 21536 / LMG 10740 / 183-1w) OX=278197 GN=proS PE=3 SV=1	SYP_PEDPA	proS	Uniprot_Pediococcus_pentosaceus_strain_ATCC.fasta	64008.2	1	15	17	32	0.000696	0.313	DAYSFHADEETLDQSFR	K	D	0.997	69.3	25	69.3	2030.87	3106	395355	159	175
sample Treatment	2022 5:30:55 PM;File Size: 1000722054 [Byte] (F057606)	Proline--tRNA ligase OS=Pediococcus pentosaceus (strain ATCC 25745 / CCUG 21536 / LMG 10740 / 183-1w) OX=278197 GN=proS PE=3 SV=1	SYP_PEDPA	proS	Uniprot_Pediococcus_pentosaceus_strain_ATCC.fasta	64008.2	1	15	17	32	0.000696	0.313	EIVGDAGAMGGR	R	D	0.901	28.1	25	28.1	1132.54	2024	92026.1	194	205
sample Treatment	2022 5:30:55 PM;File Size: 1000722054 [Byte] (F057606)	Proline--tRNA ligase OS=Pediococcus pentosaceus (strain ATCC 25745 / CCUG 21536 / LMG 10740 / 183-1w) OX=278197 GN=proS PE=3 SV=1	SYP_PEDPA	proS	Uniprot_Pediococcus_pentosaceus_strain_ATCC.fasta	64008.2	1	15	17	32	0.000696	0.313	FADSDLIGIPLR	K	V	0.997	81.1	25	81.1	1316.72	3542	381255	518	529
sample Treatment	2022 5:30:55 PM;File Size: 1000722054 [Byte] (F057606)	Proline--tRNA ligase OS=Pediococcus pentosaceus (strain ATCC 25745 / CCUG 21536 / LMG 10740 / 183-1w) OX=278197 GN=proS PE=3 SV=1	SYP_PEDPA	proS	Uniprot_Pediococcus_pentosaceus_strain_ATCC.fasta	64008.2	1	15	17	32	0.000696	0.313	GNDQLNEVK	R	L	0.994	45.4	25	45.4	1016.5	1628	118543	296	304
sample Treatment	2022 5:30:55 PM;File Size: 1000722054 [Byte] (F057606)	Proline--tRNA ligase OS=Pediococcus pentosaceus (strain ATCC 25745 / CCUG 21536 / LMG 10740 / 183-1w) OX=278197 GN=proS PE=3 SV=1	SYP_PEDPA	proS	Uniprot_Pediococcus_pentosaceus_strain_ATCC.fasta	64008.2	1	15	17	32	0.000696	0.313	LLSAVSEQQSDENGLVWPK	R	N	0.997	60.5	25	60.5	2100.06	3199.5	31503.5	450	468
sample Treatment	2022 5:30:55 PM;File Size: 1000722054 [Byte] (F057606)	Proline--tRNA ligase OS=Pediococcus pentosaceus (strain ATCC 25745 / CCUG 21536 / LMG 10740 / 183-1w) OX=278197 GN=proS PE=3 SV=1	SYP_PEDPA	proS	Uniprot_Pediococcus_pentosaceus_strain_ATCC.fasta	64008.2	1	15	17	32	0.000696	0.313	LPLSLYQIQMK	K	Y	0.986	38.7	25	38.7	1333.76	3462	47993.1	128	138
sample Treatment	2022 5:30:55 PM;File Size: 1000722054 [Byte] (F057606)	Proline--tRNA ligase OS=Pediococcus pentosaceus (strain ATCC 25745 / CCUG 21536 / LMG 10740 / 183-1w) OX=278197 GN=proS PE=3 SV=1	SYP_PEDPA	proS	Uniprot_Pediococcus_pentosaceus_strain_ATCC.fasta	64008.2	1	15	17	32	0.000696	0.313	LTNLLHADEVR	K	E	0.996	50.2	25	45.7	1280.7	2520	377822	305	315
sample Treatment	2022 5:30:55 PM;File Size: 1000722054 [Byte] (F057606)	Proline--tRNA ligase OS=Pediococcus pentosaceus (strain ATCC 25745 / CCUG 21536 / LMG 10740 / 183-1w) OX=278197 GN=proS PE=3 SV=1	SYP_PEDPA	proS	Uniprot_Pediococcus_pentosaceus_strain_ATCC.fasta	64008.2	1	15	17	32	0.000696	0.313	NIAPYDVHVIPVNAK	K	N	0.995	48.4	25	48.4	1649.9	2884	513707	469	483
sample Treatment	2022 5:30:55 PM;File Size: 1000722054 [Byte] (F057606)	Proline--tRNA ligase OS=Pediococcus pentosaceus (strain ATCC 25745 / CCUG 21536 / LMG 10740 / 183-1w) OX=278197 GN=proS PE=3 SV=1	SYP_PEDPA	proS	Uniprot_Pediococcus_pentosaceus_strain_ATCC.fasta	64008.2	1	15	17	32	0.000696	0.313	QISAGMYAYLPLAYK	R	V	0.997	58.3	25	58.3	1688.87	3732	116271	34	48
sample Treatment	2022 5:30:55 PM;File Size: 1000722054 [Byte] (F057606)	Proline--tRNA ligase OS=Pediococcus pentosaceus (strain ATCC 25745 / CCUG 21536 / LMG 10740 / 183-1w) OX=278197 GN=proS PE=3 SV=1	SYP_PEDPA	proS	Uniprot_Pediococcus_pentosaceus_strain_ATCC.fasta	64008.2	1	15	17	32	0.000696	0.313	TGEAVEVK	K	V	0.988	39.8	25	39.8	832.441	1436	45557.9	548	555
sample Treatment	2022 5:30:55 PM;File Size: 1000722054 [Byte] (F057606)	Proline--tRNA ligase OS=Pediococcus pentosaceus (strain ATCC 25745 / CCUG 21536 / LMG 10740 / 183-1w) OX=278197 GN=proS PE=3 SV=1	SYP_PEDPA	proS	Uniprot_Pediococcus_pentosaceus_strain_ATCC.fasta	64008.2	1	15	17	32	0.000696	0.313	VATDDAHSIDEVAAK	K	L	0.997	65.2	25	65.2	1541.74	1997	194936	255	269
sample Treatment	2022 5:30:55 PM;File Size: 1000722054 [Byte] (F057606)	Proline--tRNA ligase OS=Pediococcus pentosaceus (strain ATCC 25745 / CCUG 21536 / LMG 10740 / 183-1w) OX=278197 GN=proS PE=3 SV=1	SYP_PEDPA	proS	Uniprot_Pediococcus_pentosaceus_strain_ATCC.fasta	64008.2	1	15	17	32	0.000696	0.313	YETYGQELYK	R	F	0.997	54.5	25	54.5	1293.6	2403.5	251811	86	95
sample Treatment	2022 5:30:55 PM;File Size: 1000722054 [Byte] (F057606)	Proline--tRNA ligase OS=Pediococcus pentosaceus (strain ATCC 25745 / CCUG 21536 / LMG 10740 / 183-1w) OX=278197 GN=proS PE=3 SV=1	SYP_PEDPA	proS	Uniprot_Pediococcus_pentosaceus_strain_ATCC.fasta	64008.2	1	15	17	32	0.000696	0.313	YSEALDAK	K	V	0.99	53.9	25	53.9	896.436	1664	243367	420	427
sample Treatment	2022 5:30:55 PM;File Size: 1000722054 [Byte] (F057606)	6-phosphogluconolactonase OS=Pediococcus pentosaceus (strain ATCC 25745 / CCUG 21536 / LMG 10740 / 183-1w) OX=278197 GN=PEPE_1198 PE=3 SV=1	Q03EX0_PEDPA	PEPE_1198	Uniprot_Pediococcus_pentosaceus_strain_ATCC.fasta	37376.2	1	3	3	5	0.000109	0.119	DVAAPEVVCVHFK	K	-	0.979	36.4	25	36.4	1470.74	2862.5	170253	324	336
sample Treatment	2022 5:30:55 PM;File Size: 1000722054 [Byte] (F057606)	6-phosphogluconolactonase OS=Pediococcus pentosaceus (strain ATCC 25745 / CCUG 21536 / LMG 10740 / 183-1w) OX=278197 GN=PEPE_1198 PE=3 SV=1	Q03EX0_PEDPA	PEPE_1198	Uniprot_Pediococcus_pentosaceus_strain_ATCC.fasta	37376.2	1	3	3	5	0.000109	0.119	IISTFETTPGFGPR	K	H	0.997	63.5	25	63.5	1522.79	3041.5	220562	175	188
sample Treatment	2022 5:30:55 PM;File Size: 1000722054 [Byte] (F057606)	6-phosphogluconolactonase OS=Pediococcus pentosaceus (strain ATCC 25745 / CCUG 21536 / LMG 10740 / 183-1w) OX=278197 GN=PEPE_1198 PE=3 SV=1	Q03EX0_PEDPA	PEPE_1198	Uniprot_Pediococcus_pentosaceus_strain_ATCC.fasta	37376.2	1	3	3	5	0.000109	0.119	LIQNISVEGSFPR	K	D	0.986	39	25	39	1459.79	3023	70405.1	273	285
sample Treatment	2022 5:30:55 PM;File Size: 1000722054 [Byte] (F057606)	Probable succinyl-diaminopimelate desuccinylase OS=Pediococcus pentosaceus (strain ATCC 25745 / CCUG 21536 / LMG 10740 / 183-1w) OX=278197 GN=PEPE_0111 PE=4 SV=1	Q03HV4_PEDPA	PEPE_0111	Uniprot_Pediococcus_pentosaceus_strain_ATCC.fasta	41668.6	1	4	4	6	0.00013	0.133	DIVVAASPGITDASNLAK	R	D	0.989	40.2	25	40.2	1741.93	2953.5	94536.8	319	336
sample Treatment	2022 5:30:55 PM;File Size: 1000722054 [Byte] (F057606)	Probable succinyl-diaminopimelate desuccinylase OS=Pediococcus pentosaceus (strain ATCC 25745 / CCUG 21536 / LMG 10740 / 183-1w) OX=278197 GN=PEPE_0111 PE=4 SV=1	Q03HV4_PEDPA	PEPE_0111	Uniprot_Pediococcus_pentosaceus_strain_ATCC.fasta	41668.6	1	4	4	6	0.00013	0.133	IIQSLGK	K	E	0.9	30.1	25	22	758.477	1819	54198.8	307	313
sample Treatment	2022 5:30:55 PM;File Size: 1000722054 [Byte] (F057606)	Probable succinyl-diaminopimelate desuccinylase OS=Pediococcus pentosaceus (strain ATCC 25745 / CCUG 21536 / LMG 10740 / 183-1w) OX=278197 GN=PEPE_0111 PE=4 SV=1	Q03HV4_PEDPA	PEPE_0111	Uniprot_Pediococcus_pentosaceus_strain_ATCC.fasta	41668.6	1	4	4	6	0.00013	0.133	ILADLIK	K	I	0.9	45.9	25	24.3	785.513	2904.5	68882.6	14	20
sample Treatment	2022 5:30:55 PM;File Size: 1000722054 [Byte] (F057606)	Probable succinyl-diaminopimelate desuccinylase OS=Pediococcus pentosaceus (strain ATCC 25745 / CCUG 21536 / LMG 10740 / 183-1w) OX=278197 GN=PEPE_0111 PE=4 SV=1	Q03HV4_PEDPA	PEPE_0111	Uniprot_Pediococcus_pentosaceus_strain_ATCC.fasta	41668.6	1	4	4	6	0.00013	0.133	LLATAGEEVGEEGSAAFYR	R	D	0.975	35.2	25	35.2	1969.95	3033	18081.4	135	153
sample Treatment	2022 5:30:55 PM;File Size: 1000722054 [Byte] (F057606)	DNA-directed RNA polymerase subunit beta' OS=Pediococcus pentosaceus (strain ATCC 25745 / CCUG 21536 / LMG 10740 / 183-1w) OX=278197 GN=rpoC PE=3 SV=1	RPOC_PEDPA	rpoC	Uniprot_Pediococcus_pentosaceus_strain_ATCC.fasta	135039	1	39	41	77	0.00167	0.416	AALETNSFLSAASFQETTR	K	V	0.997	115	25	115	2044	3410.5	70006.4	1128	1146
sample Treatment	2022 5:30:55 PM;File Size: 1000722054 [Byte] (F057606)	DNA-directed RNA polymerase subunit beta' OS=Pediococcus pentosaceus (strain ATCC 25745 / CCUG 21536 / LMG 10740 / 183-1w) OX=278197 GN=rpoC PE=3 SV=1	RPOC_PEDPA	rpoC	Uniprot_Pediococcus_pentosaceus_strain_ATCC.fasta	135039	1	39	41	77	0.00167	0.416	AESVGEGMIFNDLDEVR	R	L	0.997	69	25	69	1880.87	3615.5	112676	507	523
sample Treatment	2022 5:30:55 PM;File Size: 1000722054 [Byte] (F057606)	DNA-directed RNA polymerase subunit beta' OS=Pediococcus pentosaceus (strain ATCC 25745 / CCUG 21536 / LMG 10740 / 183-1w) OX=278197 GN=rpoC PE=3 SV=1	RPOC_PEDPA	rpoC	Uniprot_Pediococcus_pentosaceus_strain_ATCC.fasta	135039	1	39	41	77	0.00167	0.416	DGKPVVTPSQDMVIGNYWLTMER	K	A	0.941	30.7	25	30.7	2636.28	3807.5	88875.8	484	506
sample Treatment	2022 5:30:55 PM;File Size: 1000722054 [Byte] (F057606)	DNA-directed RNA polymerase subunit beta' OS=Pediococcus pentosaceus (strain ATCC 25745 / CCUG 21536 / LMG 10740 / 183-1w) OX=278197 GN=rpoC PE=3 SV=1	RPOC_PEDPA	rpoC	Uniprot_Pediococcus_pentosaceus_strain_ATCC.fasta	135039	1	39	41	77	0.00167	0.416	EANQLKEELK	K	E	0.995	46.5	25	46.5	1201.64	1909	49506.2	187	196
sample Treatment	2022 5:30:55 PM;File Size: 1000722054 [Byte] (F057606)	DNA-directed RNA polymerase subunit beta' OS=Pediococcus pentosaceus (strain ATCC 25745 / CCUG 21536 / LMG 10740 / 183-1w) OX=278197 GN=rpoC PE=3 SV=1	RPOC_PEDPA	rpoC	Uniprot_Pediococcus_pentosaceus_strain_ATCC.fasta	135039	1	39	41	77	0.00167	0.416	EGLSVLEMFISTHGAR	R	K	0.984	38.4	25	38.4	1762.88	3849	36780.3	769	784
sample Treatment	2022 5:30:55 PM;File Size: 1000722054 [Byte] (F057606)	DNA-directed RNA polymerase subunit beta' OS=Pediococcus pentosaceus (strain ATCC 25745 / CCUG 21536 / LMG 10740 / 183-1w) OX=278197 GN=rpoC PE=3 SV=1	RPOC_PEDPA	rpoC	Uniprot_Pediococcus_pentosaceus_strain_ATCC.fasta	135039	1	39	41	77	0.00167	0.416	EQLNQRPLIAPFK	R	S	0.961	32.9	25	32.9	1553.88	2860	274355	604	616
sample Treatment	2022 5:30:55 PM;File Size: 1000722054 [Byte] (F057606)	DNA-directed RNA polymerase subunit beta' OS=Pediococcus pentosaceus (strain ATCC 25745 / CCUG 21536 / LMG 10740 / 183-1w) OX=278197 GN=rpoC PE=3 SV=1	RPOC_PEDPA	rpoC	Uniprot_Pediococcus_pentosaceus_strain_ATCC.fasta	135039	1	39	41	77	0.00167	0.416	FATSDLNDLYR	R	R	0.997	84.7	25	84.7	1314.63	2952	341043	249	259
sample Treatment	2022 5:30:55 PM;File Size: 1000722054 [Byte] (F057606)	DNA-directed RNA polymerase subunit beta' OS=Pediococcus pentosaceus (strain ATCC 25745 / CCUG 21536 / LMG 10740 / 183-1w) OX=278197 GN=rpoC PE=3 SV=1	RPOC_PEDPA	rpoC	Uniprot_Pediococcus_pentosaceus_strain_ATCC.fasta	135039	1	39	41	77	0.00167	0.416	FESMQIGLASPDK	K	I	0.997	82.2	25	82.2	1422.69	2895	116689	7	19
sample Treatment	2022 5:30:55 PM;File Size: 1000722054 [Byte] (F057606)	DNA-directed RNA polymerase subunit beta' OS=Pediococcus pentosaceus (strain ATCC 25745 / CCUG 21536 / LMG 10740 / 183-1w) OX=278197 GN=rpoC PE=3 SV=1	RPOC_PEDPA	rpoC	Uniprot_Pediococcus_pentosaceus_strain_ATCC.fasta	135039	1	39	41	77	0.00167	0.416	GLITDDER	R	Y	0.99	42.3	25	42.3	918.453	1912	247804	690	697
sample Treatment	2022 5:30:55 PM;File Size: 1000722054 [Byte] (F057606)	DNA-directed RNA polymerase subunit beta' OS=Pediococcus pentosaceus (strain ATCC 25745 / CCUG 21536 / LMG 10740 / 183-1w) OX=278197 GN=rpoC PE=3 SV=1	RPOC_PEDPA	rpoC	Uniprot_Pediococcus_pentosaceus_strain_ATCC.fasta	135039	1	39	41	77	0.00167	0.416	GNISNFTQLAGMR	R	G	0.997	87.4	25	87.4	1408.7	3175	209079	736	748
sample Treatment	2022 5:30:55 PM;File Size: 1000722054 [Byte] (F057606)	DNA-directed RNA polymerase subunit beta' OS=Pediococcus pentosaceus (strain ATCC 25745 / CCUG 21536 / LMG 10740 / 183-1w) OX=278197 GN=rpoC PE=3 SV=1	RPOC_PEDPA	rpoC	Uniprot_Pediococcus_pentosaceus_strain_ATCC.fasta	135039	1	39	41	77	0.00167	0.416	GPAEISEVTGTVEAIEEDPAEGTK	K	D	0.997	82.5	25	82.5	2429.16	3508.5	184017	968	991
sample Treatment	2022 5:30:55 PM;File Size: 1000722054 [Byte] (F057606)	DNA-directed RNA polymerase subunit beta' OS=Pediococcus pentosaceus (strain ATCC 25745 / CCUG 21536 / LMG 10740 / 183-1w) OX=278197 GN=rpoC PE=3 SV=1	RPOC_PEDPA	rpoC	Uniprot_Pediococcus_pentosaceus_strain_ATCC.fasta	135039	1	39	41	77	0.00167	0.416	GSALNEGSIDPK	R	E	0.997	54.1	25	54.1	1187.59	2057	96593.2	1023	1034
sample Treatment	2022 5:30:55 PM;File Size: 1000722054 [Byte] (F057606)	DNA-directed RNA polymerase subunit beta' OS=Pediococcus pentosaceus (strain ATCC 25745 / CCUG 21536 / LMG 10740 / 183-1w) OX=278197 GN=rpoC PE=3 SV=1	RPOC_PEDPA	rpoC	Uniprot_Pediococcus_pentosaceus_strain_ATCC.fasta	135039	1	39	41	77	0.00167	0.416	HVEIMIR	K	Q	0.9	28.4	25	28.4	897.497	2233	132096	1068	1074
sample Treatment	2022 5:30:55 PM;File Size: 1000722054 [Byte] (F057606)	DNA-directed RNA polymerase subunit beta' OS=Pediococcus pentosaceus (strain ATCC 25745 / CCUG 21536 / LMG 10740 / 183-1w) OX=278197 GN=rpoC PE=3 SV=1	RPOC_PEDPA	rpoC	Uniprot_Pediococcus_pentosaceus_strain_ATCC.fasta	135039	1	39	41	77	0.00167	0.416	IIPAGTGMTDYR	K	Q	0.986	38.6	25	38.6	1294.65	2413.5	338842	1172	1183
sample Treatment	2022 5:30:55 PM;File Size: 1000722054 [Byte] (F057606)	DNA-directed RNA polymerase subunit beta' OS=Pediococcus pentosaceus (strain ATCC 25745 / CCUG 21536 / LMG 10740 / 183-1w) OX=278197 GN=rpoC PE=3 SV=1	RPOC_PEDPA	rpoC	Uniprot_Pediococcus_pentosaceus_strain_ATCC.fasta	135039	1	39	41	77	0.00167	0.416	IQEIVESR	R	N	0.99	43.8	25	43.8	973.531	1883.5	645885	957	964
sample Treatment	2022 5:30:55 PM;File Size: 1000722054 [Byte] (F057606)	DNA-directed RNA polymerase subunit beta' OS=Pediococcus pentosaceus (strain ATCC 25745 / CCUG 21536 / LMG 10740 / 183-1w) OX=278197 GN=rpoC PE=3 SV=1	RPOC_PEDPA	rpoC	Uniprot_Pediococcus_pentosaceus_strain_ATCC.fasta	135039	1	39	41	77	0.00167	0.416	KGMTDTALK	R	T	0.997	63.7	25	53.6	964.513	1578	123761	785	793
sample Treatment	2022 5:30:55 PM;File Size: 1000722054 [Byte] (F057606)	DNA-directed RNA polymerase subunit beta' OS=Pediococcus pentosaceus (strain ATCC 25745 / CCUG 21536 / LMG 10740 / 183-1w) OX=278197 GN=rpoC PE=3 SV=1	RPOC_PEDPA	rpoC	Uniprot_Pediococcus_pentosaceus_strain_ATCC.fasta	135039	1	39	41	77	0.00167	0.416	KQILITTVGK	R	M	0.984	38.1	25	38.1	1100.7	2228.5	172876	555	564
sample Treatment	2022 5:30:55 PM;File Size: 1000722054 [Byte] (F057606)	DNA-directed RNA polymerase subunit beta' OS=Pediococcus pentosaceus (strain ATCC 25745 / CCUG 21536 / LMG 10740 / 183-1w) OX=278197 GN=rpoC PE=3 SV=1	RPOC_PEDPA	rpoC	Uniprot_Pediococcus_pentosaceus_strain_ATCC.fasta	135039	1	39	41	77	0.00167	0.416	LALQNGYVSIHTR	R	I	0.995	47.7	25	38.3	1471.8	2635	141599	524	536
sample Treatment	2022 5:30:55 PM;File Size: 1000722054 [Byte] (F057606)	DNA-directed RNA polymerase subunit beta' OS=Pediococcus pentosaceus (strain ATCC 25745 / CCUG 21536 / LMG 10740 / 183-1w) OX=278197 GN=rpoC PE=3 SV=1	RPOC_PEDPA	rpoC	Uniprot_Pediococcus_pentosaceus_strain_ATCC.fasta	135039	1	39	41	77	0.00167	0.416	LGIQAFEPVLVSGK	R	A	0.997	79.7	25	79.7	1457.84	3618.5	548361	421	434
sample Treatment	2022 5:30:55 PM;File Size: 1000722054 [Byte] (F057606)	DNA-directed RNA polymerase subunit beta' OS=Pediococcus pentosaceus (strain ATCC 25745 / CCUG 21536 / LMG 10740 / 183-1w) OX=278197 GN=rpoC PE=3 SV=1	RPOC_PEDPA	rpoC	Uniprot_Pediococcus_pentosaceus_strain_ATCC.fasta	135039	1	39	41	77	0.00167	0.416	LHPLACEAYNADFDGDQMAIHLPLSNEAQAEAR	R	L	0.997	91.7	25	91.7	3667.69	3517.5	229290	438	470
sample Treatment	2022 5:30:55 PM;File Size: 1000722054 [Byte] (F057606)	DNA-directed RNA polymerase subunit beta' OS=Pediococcus pentosaceus (strain ATCC 25745 / CCUG 21536 / LMG 10740 / 183-1w) OX=278197 GN=rpoC PE=3 SV=1	RPOC_PEDPA	rpoC	Uniprot_Pediococcus_pentosaceus_strain_ATCC.fasta	135039	1	39	41	77	0.00167	0.416	LLDLNAPGIIVQNEK	R	R	0.997	79.3	25	79.3	1636.93	3392	393312	271	285
sample Treatment	2022 5:30:55 PM;File Size: 1000722054 [Byte] (F057606)	DNA-directed RNA polymerase subunit beta' OS=Pediococcus pentosaceus (strain ATCC 25745 / CCUG 21536 / LMG 10740 / 183-1w) OX=278197 GN=rpoC PE=3 SV=1	RPOC_PEDPA	rpoC	Uniprot_Pediococcus_pentosaceus_strain_ATCC.fasta	135039	1	39	41	77	0.00167	0.416	LLMLAAHHILAPK	R	D	0.997	69.2	25	69.2	1427.86	2888	281341	471	483
sample Treatment	2022 5:30:55 PM;File Size: 1000722054 [Byte] (F057606)	DNA-directed RNA polymerase subunit beta' OS=Pediococcus pentosaceus (strain ATCC 25745 / CCUG 21536 / LMG 10740 / 183-1w) OX=278197 GN=rpoC PE=3 SV=1	RPOC_PEDPA	rpoC	Uniprot_Pediococcus_pentosaceus_strain_ATCC.fasta	135039	1	39	41	77	0.00167	0.416	LVDVAQDVIVR	R	E	0.997	70.8	25	69.3	1226.71	2948.5	512350	804	814
sample Treatment	2022 5:30:55 PM;File Size: 1000722054 [Byte] (F057606)	DNA-directed RNA polymerase subunit beta' OS=Pediococcus pentosaceus (strain ATCC 25745 / CCUG 21536 / LMG 10740 / 183-1w) OX=278197 GN=rpoC PE=3 SV=1	RPOC_PEDPA	rpoC	Uniprot_Pediococcus_pentosaceus_strain_ATCC.fasta	135039	1	39	41	77	0.00167	0.416	MGHIELAAPVTHIWYFK	R	G	0.997	77.9	25	77.9	2013.04	3647	540585	92	108
sample Treatment	2022 5:30:55 PM;File Size: 1000722054 [Byte] (F057606)	DNA-directed RNA polymerase subunit beta' OS=Pediococcus pentosaceus (strain ATCC 25745 / CCUG 21536 / LMG 10740 / 183-1w) OX=278197 GN=rpoC PE=3 SV=1	RPOC_PEDPA	rpoC	Uniprot_Pediococcus_pentosaceus_strain_ATCC.fasta	135039	1	39	41	77	0.00167	0.416	MIDVNKFESMQIGLASPDK	-	I	0.983	37.7	25	37.7	2123.05	3404	43321.4	1	19
sample Treatment	2022 5:30:55 PM;File Size: 1000722054 [Byte] (F057606)	DNA-directed RNA polymerase subunit beta' OS=Pediococcus pentosaceus (strain ATCC 25745 / CCUG 21536 / LMG 10740 / 183-1w) OX=278197 GN=rpoC PE=3 SV=1	RPOC_PEDPA	rpoC	Uniprot_Pediococcus_pentosaceus_strain_ATCC.fasta	135039	1	39	41	77	0.00167	0.416	MLFNDILPK	K	G	0.951	31.5	25	31.5	1090.6	3587.5	205684	565	573
sample Treatment	2022 5:30:55 PM;File Size: 1000722054 [Byte] (F057606)	DNA-directed RNA polymerase subunit beta' OS=Pediococcus pentosaceus (strain ATCC 25745 / CCUG 21536 / LMG 10740 / 183-1w) OX=278197 GN=rpoC PE=3 SV=1	RPOC_PEDPA	rpoC	Uniprot_Pediococcus_pentosaceus_strain_ATCC.fasta	135039	1	39	41	77	0.00167	0.416	MQGIEISDK	R	H	0.993	44.1	25	44.1	1020.5	2251.5	156787	1059	1067
sample Treatment	2022 5:30:55 PM;File Size: 1000722054 [Byte] (F057606)	DNA-directed RNA polymerase subunit beta' OS=Pediococcus pentosaceus (strain ATCC 25745 / CCUG 21536 / LMG 10740 / 183-1w) OX=278197 GN=rpoC PE=3 SV=1	RPOC_PEDPA	rpoC	Uniprot_Pediococcus_pentosaceus_strain_ATCC.fasta	135039	1	39	41	77	0.00167	0.416	NFHTGGVAGNADITQGLPR	R	I	0.997	74.4	25	64.3	1924.96	2690	474889	938	956
sample Treatment	2022 5:30:55 PM;File Size: 1000722054 [Byte] (F057606)	DNA-directed RNA polymerase subunit beta' OS=Pediococcus pentosaceus (strain ATCC 25745 / CCUG 21536 / LMG 10740 / 183-1w) OX=278197 GN=rpoC PE=3 SV=1	RPOC_PEDPA	rpoC	Uniprot_Pediococcus_pentosaceus_strain_ATCC.fasta	135039	1	39	41	77	0.00167	0.416	QIKPEVVGGNVEQPQSLSDVEK	R	E	0.997	67.6	25	66.6	2380.24	2629	550165	1184	1205
sample Treatment	2022 5:30:55 PM;File Size: 1000722054 [Byte] (F057606)	DNA-directed RNA polymerase subunit beta' OS=Pediococcus pentosaceus (strain ATCC 25745 / CCUG 21536 / LMG 10740 / 183-1w) OX=278197 GN=rpoC PE=3 SV=1	RPOC_PEDPA	rpoC	Uniprot_Pediococcus_pentosaceus_strain_ATCC.fasta	135039	1	39	41	77	0.00167	0.416	QILITTVGK	K	M	0.996	49.2	25	49.2	972.609	2527	291126	556	564
sample Treatment	2022 5:30:55 PM;File Size: 1000722054 [Byte] (F057606)	DNA-directed RNA polymerase subunit beta' OS=Pediococcus pentosaceus (strain ATCC 25745 / CCUG 21536 / LMG 10740 / 183-1w) OX=278197 GN=rpoC PE=3 SV=1	RPOC_PEDPA	rpoC	Uniprot_Pediococcus_pentosaceus_strain_ATCC.fasta	135039	1	39	41	77	0.00167	0.416	RLVDVAQDVIVR	R	E	0.995	49.2	25	49.2	1382.81	2883	175055	803	814
sample Treatment	2022 5:30:55 PM;File Size: 1000722054 [Byte] (F057606)	DNA-directed RNA polymerase subunit beta' OS=Pediococcus pentosaceus (strain ATCC 25745 / CCUG 21536 / LMG 10740 / 183-1w) OX=278197 GN=rpoC PE=3 SV=1	RPOC_PEDPA	rpoC	Uniprot_Pediococcus_pentosaceus_strain_ATCC.fasta	135039	1	39	41	77	0.00167	0.416	SAFTCNTAHGVCEK	R	C	0.996	48	25	48	1581.68	1795	309825	888	901
sample Treatment	2022 5:30:55 PM;File Size: 1000722054 [Byte] (F057606)	DNA-directed RNA polymerase subunit beta' OS=Pediococcus pentosaceus (strain ATCC 25745 / CCUG 21536 / LMG 10740 / 183-1w) OX=278197 GN=rpoC PE=3 SV=1	RPOC_PEDPA	rpoC	Uniprot_Pediococcus_pentosaceus_strain_ATCC.fasta	135039	1	39	41	77	0.00167	0.416	SVIDVGPSLK	R	M	0.93	29.7	25	29.7	1014.58	2609	358987	342	351
sample Treatment	2022 5:30:55 PM;File Size: 1000722054 [Byte] (F057606)	DNA-directed RNA polymerase subunit beta' OS=Pediococcus pentosaceus (strain ATCC 25745 / CCUG 21536 / LMG 10740 / 183-1w) OX=278197 GN=rpoC PE=3 SV=1	RPOC_PEDPA	rpoC	Uniprot_Pediococcus_pentosaceus_strain_ATCC.fasta	135039	1	39	41	77	0.00167	0.416	TANSGYLTR	K	R	0.997	50.6	25	50.6	982.495	1730	141782	794	802
sample Treatment	2022 5:30:55 PM;File Size: 1000722054 [Byte] (F057606)	DNA-directed RNA polymerase subunit beta' OS=Pediococcus pentosaceus (strain ATCC 25745 / CCUG 21536 / LMG 10740 / 183-1w) OX=278197 GN=rpoC PE=3 SV=1	RPOC_PEDPA	rpoC	Uniprot_Pediococcus_pentosaceus_strain_ATCC.fasta	135039	1	39	41	77	0.00167	0.416	TLIAGGIPATSRPVILGITK	K	A	0.948	31.4	25	31.4	1978.21	3368.5	392849	1108	1127
sample Treatment	2022 5:30:55 PM;File Size: 1000722054 [Byte] (F057606)	DNA-directed RNA polymerase subunit beta' OS=Pediococcus pentosaceus (strain ATCC 25745 / CCUG 21536 / LMG 10740 / 183-1w) OX=278197 GN=rpoC PE=3 SV=1	RPOC_PEDPA	rpoC	Uniprot_Pediococcus_pentosaceus_strain_ATCC.fasta	135039	1	39	41	77	0.00167	0.416	VIGIWNDAK	R	D	0.996	47.8	25	47.8	1015.56	2816	436926	701	709
sample Treatment	2022 5:30:55 PM;File Size: 1000722054 [Byte] (F057606)	DNA-directed RNA polymerase subunit beta' OS=Pediococcus pentosaceus (strain ATCC 25745 / CCUG 21536 / LMG 10740 / 183-1w) OX=278197 GN=rpoC PE=3 SV=1	RPOC_PEDPA	rpoC	Uniprot_Pediococcus_pentosaceus_strain_ATCC.fasta	135039	1	39	41	77	0.00167	0.416	VLTDAAIR	R	G	0.99	47.4	25	45	858.504	2056.5	310237	1147	1154
sample Treatment	2022 5:30:55 PM;File Size: 1000722054 [Byte] (F057606)	DNA-directed RNA polymerase subunit beta' OS=Pediococcus pentosaceus (strain ATCC 25745 / CCUG 21536 / LMG 10740 / 183-1w) OX=278197 GN=rpoC PE=3 SV=1	RPOC_PEDPA	rpoC	Uniprot_Pediococcus_pentosaceus_strain_ATCC.fasta	135039	1	39	41	77	0.00167	0.416	VRDVLSTENYLLSEIQK	K	V	0.938	30.5	25	30.5	2007.08	3609	82652.8	1039	1055
sample Treatment	2022 5:30:55 PM;File Size: 1000722054 [Byte] (F057606)	DNA-directed RNA polymerase subunit beta' OS=Pediococcus pentosaceus (strain ATCC 25745 / CCUG 21536 / LMG 10740 / 183-1w) OX=278197 GN=rpoC PE=3 SV=1	RPOC_PEDPA	rpoC	Uniprot_Pediococcus_pentosaceus_strain_ATCC.fasta	135039	1	39	41	77	0.00167	0.416	VTETSLLLDR	K	M	0.997	54	25	54	1146.64	2802	212285	633	642
sample Treatment	2022 5:30:55 PM;File Size: 1000722054 [Byte] (F057606)	50S ribosomal protein L27 OS=Pediococcus pentosaceus (strain ATCC 25745 / CCUG 21536 / LMG 10740 / 183-1w) OX=278197 GN=rpmA PE=3 SV=1	RL27_PEDPA	rpmA	Uniprot_Pediococcus_pentosaceus_strain_ATCC.fasta	10380.7	1	4	7	22	0.000478	0.474	AGMIIYR	K	Q	0.9	68.3	25	64.2	823.449	2334	1403850	40	46
sample Treatment	2022 5:30:55 PM;File Size: 1000722054 [Byte] (F057606)	50S ribosomal protein L27 OS=Pediococcus pentosaceus (strain ATCC 25745 / CCUG 21536 / LMG 10740 / 183-1w) OX=278197 GN=rpmA PE=3 SV=1	RL27_PEDPA	rpmA	Uniprot_Pediococcus_pentosaceus_strain_ATCC.fasta	10380.7	1	4	7	22	0.000478	0.474	GNDDTLFALADGVVR	R	F	0.997	92.6	25	92.6	1562.78	3838	2734940	61	75
sample Treatment	2022 5:30:55 PM;File Size: 1000722054 [Byte] (F057606)	50S ribosomal protein L27 OS=Pediococcus pentosaceus (strain ATCC 25745 / CCUG 21536 / LMG 10740 / 183-1w) OX=278197 GN=rpmA PE=3 SV=1	RL27_PEDPA	rpmA	Uniprot_Pediococcus_pentosaceus_strain_ATCC.fasta	10380.7	1	4	7	22	0.000478	0.474	GTHIYPGVNVGR	R	G	0.997	57.2	25	57.2	1269.67	2223	3943480	49	60
sample Treatment	2022 5:30:55 PM;File Size: 1000722054 [Byte] (F057606)	50S ribosomal protein L27 OS=Pediococcus pentosaceus (strain ATCC 25745 / CCUG 21536 / LMG 10740 / 183-1w) OX=278197 GN=rpmA PE=3 SV=1	RL27_PEDPA	rpmA	Uniprot_Pediococcus_pentosaceus_strain_ATCC.fasta	10380.7	1	4	7	22	0.000478	0.474	QVSVYPVADAE	R	-	0.997	51.5	25	51.5	1177.57	2579	363016	85	95
sample Treatment	2022 5:30:55 PM;File Size: 1000722054 [Byte] (F057606)	YkuD domain-containing protein OS=Pediococcus pentosaceus (strain ATCC 25745 / CCUG 21536 / LMG 10740 / 183-1w) OX=278197 GN=PEPE_0358 PE=4 SV=1	Q03H68_PEDPA	PEPE_0358	Uniprot_Pediococcus_pentosaceus_strain_ATCC.fasta	24923.2	1	4	4	9	0.000196	0.208	AYPDLDKYPK	K	A	0.987	40	25	40	1209.62	2226.5	146807	87	96
sample Treatment	2022 5:30:55 PM;File Size: 1000722054 [Byte] (F057606)	YkuD domain-containing protein OS=Pediococcus pentosaceus (strain ATCC 25745 / CCUG 21536 / LMG 10740 / 183-1w) OX=278197 GN=PEPE_0358 PE=4 SV=1	Q03H68_PEDPA	PEPE_0358	Uniprot_Pediococcus_pentosaceus_strain_ATCC.fasta	24923.2	1	4	4	9	0.000196	0.208	DSGLAGDEIQAATTK	K	S	0.997	67.4	25	67.4	1476.72	2427.5	104088	54	68
sample Treatment	2022 5:30:55 PM;File Size: 1000722054 [Byte] (F057606)	YkuD domain-containing protein OS=Pediococcus pentosaceus (strain ATCC 25745 / CCUG 21536 / LMG 10740 / 183-1w) OX=278197 GN=PEPE_0358 PE=4 SV=1	Q03H68_PEDPA	PEPE_0358	Uniprot_Pediococcus_pentosaceus_strain_ATCC.fasta	24923.2	1	4	4	9	0.000196	0.208	FLEDEAEQLGK	K	E	0.997	81.5	25	81.5	1278.62	2585.5	221666	180	190
sample Treatment	2022 5:30:55 PM;File Size: 1000722054 [Byte] (F057606)	YkuD domain-containing protein OS=Pediococcus pentosaceus (strain ATCC 25745 / CCUG 21536 / LMG 10740 / 183-1w) OX=278197 GN=PEPE_0358 PE=4 SV=1	Q03H68_PEDPA	PEPE_0358	Uniprot_Pediococcus_pentosaceus_strain_ATCC.fasta	24923.2	1	4	4	9	0.000196	0.208	GDFFYNPTSK	R	E	0.977	35.7	25	35.7	1175.54	2777	288134	143	152
sample Treatment	2022 5:30:55 PM;File Size: 1000722054 [Byte] (F057606)	50S ribosomal protein L36 OS=Pediococcus pentosaceus (strain ATCC 25745 / CCUG 21536 / LMG 10740 / 183-1w) OX=278197 GN=rpmJ PE=3 SV=1	RL36_PEDPA	rpmJ	Uniprot_Pediococcus_pentosaceus_strain_ATCC.fasta	4563.5	0.95	1	2	8	0.000174	0.256	VMVICSANPK	R	H	0.997	67.1	25	67.1	1134.56	1997	12987700	23	32
sample Treatment	2022 5:30:55 PM;File Size: 1000722054 [Byte] (F057606)	Chaperone protein ClpB OS=Pediococcus pentosaceus (strain ATCC 25745 / CCUG 21536 / LMG 10740 / 183-1w) OX=278197 GN=clpB PE=3 SV=1	Q03F71_PEDPA	clpB	Uniprot_Pediococcus_pentosaceus_strain_ATCC.fasta	97127.4	1	21	26	53	0.00115	0.345	AGLQDPNRPIGSFLFLGPTGVGK	R	T	0.995	49.1	25	49.1	2341.27	3815	778760	593	615
sample Treatment	2022 5:30:55 PM;File Size: 1000722054 [Byte] (F057606)	Chaperone protein ClpB OS=Pediococcus pentosaceus (strain ATCC 25745 / CCUG 21536 / LMG 10740 / 183-1w) OX=278197 GN=clpB PE=3 SV=1	Q03F71_PEDPA	clpB	Uniprot_Pediococcus_pentosaceus_strain_ATCC.fasta	97127.4	1	21	26	53	0.00115	0.345	AHSENPDPVIGR	R	D	0.956	32.2	25	32.2	1291.64	1785	262833	174	185
sample Treatment	2022 5:30:55 PM;File Size: 1000722054 [Byte] (F057606)	Chaperone protein ClpB OS=Pediococcus pentosaceus (strain ATCC 25745 / CCUG 21536 / LMG 10740 / 183-1w) OX=278197 GN=clpB PE=3 SV=1	Q03F71_PEDPA	clpB	Uniprot_Pediococcus_pentosaceus_strain_ATCC.fasta	97127.4	1	21	26	53	0.00115	0.345	AHSENPDPVIGRDEEILEVIR	R	I	0.96	25.9	25	25.9	2388.22	3394	172643	174	194
sample Treatment	2022 5:30:55 PM;File Size: 1000722054 [Byte] (F057606)	Chaperone protein ClpB OS=Pediococcus pentosaceus (strain ATCC 25745 / CCUG 21536 / LMG 10740 / 183-1w) OX=278197 GN=clpB PE=3 SV=1	Q03F71_PEDPA	clpB	Uniprot_Pediococcus_pentosaceus_strain_ATCC.fasta	97127.4	1	21	26	53	0.00115	0.345	AIDLIDEASAK	K	I	0.997	56.8	25	56.8	1145.61	2746.5	407036	392	402
sample Treatment	2022 5:30:55 PM;File Size: 1000722054 [Byte] (F057606)	Chaperone protein ClpB OS=Pediococcus pentosaceus (strain ATCC 25745 / CCUG 21536 / LMG 10740 / 183-1w) OX=278197 GN=clpB PE=3 SV=1	Q03F71_PEDPA	clpB	Uniprot_Pediococcus_pentosaceus_strain_ATCC.fasta	97127.4	1	21	26	53	0.00115	0.345	AKHDLQEAESSYDLDQAAILQHGTIPALEK	K	E	0.963	26.2	25	26.2	3291.65	3315	91265.2	484	513
sample Treatment	2022 5:30:55 PM;File Size: 1000722054 [Byte] (F057606)	Chaperone protein ClpB OS=Pediococcus pentosaceus (strain ATCC 25745 / CCUG 21536 / LMG 10740 / 183-1w) OX=278197 GN=clpB PE=3 SV=1	Q03F71_PEDPA	clpB	Uniprot_Pediococcus_pentosaceus_strain_ATCC.fasta	97127.4	1	21	26	53	0.00115	0.345	DEEILEVIR	R	I	0.997	56	25	39.4	1115.59	3230.5	228002	186	194
sample Treatment	2022 5:30:55 PM;File Size: 1000722054 [Byte] (F057606)	Chaperone protein ClpB OS=Pediococcus pentosaceus (strain ATCC 25745 / CCUG 21536 / LMG 10740 / 183-1w) OX=278197 GN=clpB PE=3 SV=1	Q03F71_PEDPA	clpB	Uniprot_Pediococcus_pentosaceus_strain_ATCC.fasta	97127.4	1	21	26	53	0.00115	0.345	ELEQLENQSESDHGDWLVEESVTDK	K	E	0.997	52.4	25	52.4	2916.3	3165	54687.4	514	538
sample Treatment	2022 5:30:55 PM;File Size: 1000722054 [Byte] (F057606)	Chaperone protein ClpB OS=Pediococcus pentosaceus (strain ATCC 25745 / CCUG 21536 / LMG 10740 / 183-1w) OX=278197 GN=clpB PE=3 SV=1	Q03F71_PEDPA	clpB	Uniprot_Pediococcus_pentosaceus_strain_ATCC.fasta	97127.4	1	21	26	53	0.00115	0.345	EPSIEDTISILR	K	G	0.994	45.1	25	45.1	1372.73	3555	582872	342	353
sample Treatment	2022 5:30:55 PM;File Size: 1000722054 [Byte] (F057606)	Chaperone protein ClpB OS=Pediococcus pentosaceus (strain ATCC 25745 / CCUG 21536 / LMG 10740 / 183-1w) OX=278197 GN=clpB PE=3 SV=1	Q03F71_PEDPA	clpB	Uniprot_Pediococcus_pentosaceus_strain_ATCC.fasta	97127.4	1	21	26	53	0.00115	0.345	FLNQQGLTQK	K	Q	0.997	54.7	25	49.7	1176.64	2177.5	110639	127	136
sample Treatment	2022 5:30:55 PM;File Size: 1000722054 [Byte] (F057606)	Chaperone protein ClpB OS=Pediococcus pentosaceus (strain ATCC 25745 / CCUG 21536 / LMG 10740 / 183-1w) OX=278197 GN=clpB PE=3 SV=1	Q03F71_PEDPA	clpB	Uniprot_Pediococcus_pentosaceus_strain_ATCC.fasta	97127.4	1	21	26	53	0.00115	0.345	GDVPSNLVDK	K	T	0.947	31.1	25	31.1	1043.54	2132	253080	228	237
sample Treatment	2022 5:30:55 PM;File Size: 1000722054 [Byte] (F057606)	Chaperone protein ClpB OS=Pediococcus pentosaceus (strain ATCC 25745 / CCUG 21536 / LMG 10740 / 183-1w) OX=278197 GN=clpB PE=3 SV=1	Q03F71_PEDPA	clpB	Uniprot_Pediococcus_pentosaceus_strain_ATCC.fasta	97127.4	1	21	26	53	0.00115	0.345	GELHLIGATTLDEYRENIEK	R	D	0.997	49.8	25	49.8	2301.17	3232	548619	308	327
sample Treatment	2022 5:30:55 PM;File Size: 1000722054 [Byte] (F057606)	Chaperone protein ClpB OS=Pediococcus pentosaceus (strain ATCC 25745 / CCUG 21536 / LMG 10740 / 183-1w) OX=278197 GN=clpB PE=3 SV=1	Q03F71_PEDPA	clpB	Uniprot_Pediococcus_pentosaceus_strain_ATCC.fasta	97127.4	1	21	26	53	0.00115	0.345	HDLQEAESSYDLDQAAILQHGTIPALEK	K	E	0.997	72.9	25	72.9	3092.52	3402	433025	486	513
sample Treatment	2022 5:30:55 PM;File Size: 1000722054 [Byte] (F057606)	Chaperone protein ClpB OS=Pediococcus pentosaceus (strain ATCC 25745 / CCUG 21536 / LMG 10740 / 183-1w) OX=278197 GN=clpB PE=3 SV=1	Q03F71_PEDPA	clpB	Uniprot_Pediococcus_pentosaceus_strain_ATCC.fasta	97127.4	1	21	26	53	0.00115	0.345	IDDIIMFTPLSK	R	Q	0.997	73.7	25	73.7	1392.74	3771	157726	762	773
sample Treatment	2022 5:30:55 PM;File Size: 1000722054 [Byte] (F057606)	Chaperone protein ClpB OS=Pediococcus pentosaceus (strain ATCC 25745 / CCUG 21536 / LMG 10740 / 183-1w) OX=278197 GN=clpB PE=3 SV=1	Q03F71_PEDPA	clpB	Uniprot_Pediococcus_pentosaceus_strain_ATCC.fasta	97127.4	1	21	26	53	0.00115	0.345	IDMSEYMEK	R	E	0.985	38.5	25	38.5	1145.49	2643	70133.1	636	644
sample Treatment	2022 5:30:55 PM;File Size: 1000722054 [Byte] (F057606)	Chaperone protein ClpB OS=Pediococcus pentosaceus (strain ATCC 25745 / CCUG 21536 / LMG 10740 / 183-1w) OX=278197 GN=clpB PE=3 SV=1	Q03F71_PEDPA	clpB	Uniprot_Pediococcus_pentosaceus_strain_ATCC.fasta	97127.4	1	21	26	53	0.00115	0.345	IHDNALVAAAK	R	L	0.997	69.1	25	69.1	1122.63	1926	518394	367	377
sample Treatment	2022 5:30:55 PM;File Size: 1000722054 [Byte] (F057606)	Chaperone protein ClpB OS=Pediococcus pentosaceus (strain ATCC 25745 / CCUG 21536 / LMG 10740 / 183-1w) OX=278197 GN=clpB PE=3 SV=1	Q03F71_PEDPA	clpB	Uniprot_Pediococcus_pentosaceus_strain_ATCC.fasta	97127.4	1	21	26	53	0.00115	0.345	LLHLADK	K	L	0.9	35	25	35	809.488	1973	103793	563	569
sample Treatment	2022 5:30:55 PM;File Size: 1000722054 [Byte] (F057606)	Chaperone protein ClpB OS=Pediococcus pentosaceus (strain ATCC 25745 / CCUG 21536 / LMG 10740 / 183-1w) OX=278197 GN=clpB PE=3 SV=1	Q03F71_PEDPA	clpB	Uniprot_Pediococcus_pentosaceus_strain_ATCC.fasta	97127.4	1	21	26	53	0.00115	0.345	LVGAAPGYIGYEEGGQLTEAVR	R	R	0.997	65.4	25	65.4	2250.14	3189	196814	650	671
sample Treatment	2022 5:30:55 PM;File Size: 1000722054 [Byte] (F057606)	Chaperone protein ClpB OS=Pediococcus pentosaceus (strain ATCC 25745 / CCUG 21536 / LMG 10740 / 183-1w) OX=278197 GN=clpB PE=3 SV=1	Q03F71_PEDPA	clpB	Uniprot_Pediococcus_pentosaceus_strain_ATCC.fasta	97127.4	1	21	26	53	0.00115	0.345	NNPVLIGEPGVGK	K	T	0.991	42.2	25	42.2	1293.72	2533.5	193450	202	214
sample Treatment	2022 5:30:55 PM;File Size: 1000722054 [Byte] (F057606)	Chaperone protein ClpB OS=Pediococcus pentosaceus (strain ATCC 25745 / CCUG 21536 / LMG 10740 / 183-1w) OX=278197 GN=clpB PE=3 SV=1	Q03F71_PEDPA	clpB	Uniprot_Pediococcus_pentosaceus_strain_ATCC.fasta	97127.4	1	21	26	53	0.00115	0.345	TAIVEGLAQR	K	I	0.997	51.4	25	44.1	1057.6	2371	306525	215	224
sample Treatment	2022 5:30:55 PM;File Size: 1000722054 [Byte] (F057606)	Chaperone protein ClpB OS=Pediococcus pentosaceus (strain ATCC 25745 / CCUG 21536 / LMG 10740 / 183-1w) OX=278197 GN=clpB PE=3 SV=1	Q03F71_PEDPA	clpB	Uniprot_Pediococcus_pentosaceus_strain_ATCC.fasta	97127.4	1	21	26	53	0.00115	0.345	VEMNSNPTELDQVK	K	R	0.997	77.8	25	77.8	1603.76	2457	68513	405	418
sample Treatment	2022 5:30:55 PM;File Size: 1000722054 [Byte] (F057606)	Chaperone protein ClpB OS=Pediococcus pentosaceus (strain ATCC 25745 / CCUG 21536 / LMG 10740 / 183-1w) OX=278197 GN=clpB PE=3 SV=1	Q03F71_PEDPA	clpB	Uniprot_Pediococcus_pentosaceus_strain_ATCC.fasta	97127.4	1	21	26	53	0.00115	0.345	VIGQDEAVQSVSDAVLR	R	S	0.997	110	25	110	1785.93	3184	620657	574	590
sample Treatment	2022 5:30:55 PM;File Size: 1000722054 [Byte] (F057606)	Chaperone protein ClpB OS=Pediococcus pentosaceus (strain ATCC 25745 / CCUG 21536 / LMG 10740 / 183-1w) OX=278197 GN=clpB PE=3 SV=1	Q03F71_PEDPA	clpB	Uniprot_Pediococcus_pentosaceus_strain_ATCC.fasta	97127.4	1	21	26	53	0.00115	0.345	VRPNSTVNIDVLNDQLVFQNK	R	-	0.997	71.7	25	71.7	2413.28	3443.5	329304	843	863
sample Treatment	2022 5:30:55 PM;File Size: 1000722054 [Byte] (F057606)	N-acetylmuramoyl-L-alanine amidase OS=Pediococcus pentosaceus (strain ATCC 25745 / CCUG 21536 / LMG 10740 / 183-1w) OX=278197 GN=PEPE_1117 PE=4 SV=1	Q03F50_PEDPA	PEPE_1117	Uniprot_Pediococcus_pentosaceus_strain_ATCC.fasta	32295.2	0.935	1	1	2	4.35e-05	0.0519	IGTLNQYQTVSVLSK	K	S	0.996	49.6	25	49.6	1650.91	2972.5	68685.5	60	74
sample Treatment	2022 5:30:55 PM;File Size: 1000722054 [Byte] (F057606)	Acetyl-coenzyme A carboxylase carboxyl transferase subunit beta OS=Pediococcus pentosaceus (strain ATCC 25745 / CCUG 21536 / LMG 10740 / 183-1w) OX=278197 GN=accD PE=3 SV=1	ACCD_PEDPA	accD	Uniprot_Pediococcus_pentosaceus_strain_ATCC.fasta	31007.6	1	6	6	12	0.000261	0.268	DFQQAETLLK	K	N	0.996	48.9	25	48.9	1192.62	2971	275231	240	249
sample Treatment	2022 5:30:55 PM;File Size: 1000722054 [Byte] (F057606)	Acetyl-coenzyme A carboxylase carboxyl transferase subunit beta OS=Pediococcus pentosaceus (strain ATCC 25745 / CCUG 21536 / LMG 10740 / 183-1w) OX=278197 GN=accD PE=3 SV=1	ACCD_PEDPA	accD	Uniprot_Pediococcus_pentosaceus_strain_ATCC.fasta	31007.6	1	6	6	12	0.000261	0.268	EYLNNLLNLHSDK	K	-	0.997	58.8	25	58.8	1572.8	3177.5	157210	264	276
sample Treatment	2022 5:30:55 PM;File Size: 1000722054 [Byte] (F057606)	Acetyl-coenzyme A carboxylase carboxyl transferase subunit beta OS=Pediococcus pentosaceus (strain ATCC 25745 / CCUG 21536 / LMG 10740 / 183-1w) OX=278197 GN=accD PE=3 SV=1	ACCD_PEDPA	accD	Uniprot_Pediococcus_pentosaceus_strain_ATCC.fasta	31007.6	1	6	6	12	0.000261	0.268	FIMGSLGQVTGSK	R	I	0.997	74.3	25	74.3	1324.69	3046	207095	125	137
sample Treatment	2022 5:30:55 PM;File Size: 1000722054 [Byte] (F057606)	Acetyl-coenzyme A carboxylase carboxyl transferase subunit beta OS=Pediococcus pentosaceus (strain ATCC 25745 / CCUG 21536 / LMG 10740 / 183-1w) OX=278197 GN=accD PE=3 SV=1	ACCD_PEDPA	accD	Uniprot_Pediococcus_pentosaceus_strain_ATCC.fasta	31007.6	1	6	6	12	0.000261	0.268	FSLPTQDEIVKR	K	L	0.98	36.6	25	36.6	1432.78	2810.5	94175	5	16
sample Treatment	2022 5:30:55 PM;File Size: 1000722054 [Byte] (F057606)	Acetyl-coenzyme A carboxylase carboxyl transferase subunit beta OS=Pediococcus pentosaceus (strain ATCC 25745 / CCUG 21536 / LMG 10740 / 183-1w) OX=278197 GN=accD PE=3 SV=1	ACCD_PEDPA	accD	Uniprot_Pediococcus_pentosaceus_strain_ATCC.fasta	31007.6	1	6	6	12	0.000261	0.268	IGNNEFAIGVMDSR	K	F	0.997	66.8	25	66.8	1522.73	3122	77762.8	111	124
sample Treatment	2022 5:30:55 PM;File Size: 1000722054 [Byte] (F057606)	Acetyl-coenzyme A carboxylase carboxyl transferase subunit beta OS=Pediococcus pentosaceus (strain ATCC 25745 / CCUG 21536 / LMG 10740 / 183-1w) OX=278197 GN=accD PE=3 SV=1	ACCD_PEDPA	accD	Uniprot_Pediococcus_pentosaceus_strain_ATCC.fasta	31007.6	1	6	6	12	0.000261	0.268	VIEQTINQKPPK	R	D	0.997	53.2	25	53.2	1394.8	1810.5	279422	228	239
sample Treatment	2022 5:30:55 PM;File Size: 1000722054 [Byte] (F057606)	50S ribosomal protein L4 OS=Pediococcus pentosaceus (strain ATCC 25745 / CCUG 21536 / LMG 10740 / 183-1w) OX=278197 GN=rplD PE=3 SV=1	RL4_PEDPA	rplD	Uniprot_Pediococcus_pentosaceus_strain_ATCC.fasta	22763.2	1	11	15	45	0.000978	0.502	ALLVLEEDNESAVLAAR	K	N	0.997	117	25	117	1812.97	3430.5	939668	152	168
sample Treatment	2022 5:30:55 PM;File Size: 1000722054 [Byte] (F057606)	50S ribosomal protein L4 OS=Pediococcus pentosaceus (strain ATCC 25745 / CCUG 21536 / LMG 10740 / 183-1w) OX=278197 GN=rplD PE=3 SV=1	RL4_PEDPA	rplD	Uniprot_Pediococcus_pentosaceus_strain_ATCC.fasta	22763.2	1	11	15	45	0.000978	0.502	ALSQVEEALA	K	-	0.997	51.5	25	45.7	1030.54	2971	1449010	198	207
sample Treatment	2022 5:30:55 PM;File Size: 1000722054 [Byte] (F057606)	50S ribosomal protein L4 OS=Pediococcus pentosaceus (strain ATCC 25745 / CCUG 21536 / LMG 10740 / 183-1w) OX=278197 GN=rplD PE=3 SV=1	RL4_PEDPA	rplD	Uniprot_Pediococcus_pentosaceus_strain_ATCC.fasta	22763.2	1	11	15	45	0.000978	0.502	ANVSLFK	M	Q	0.9	36.2	25	35.9	778.446	2475	1059980	2	8
sample Treatment	2022 5:30:55 PM;File Size: 1000722054 [Byte] (F057606)	50S ribosomal protein L4 OS=Pediococcus pentosaceus (strain ATCC 25745 / CCUG 21536 / LMG 10740 / 183-1w) OX=278197 GN=rplD PE=3 SV=1	RL4_PEDPA	rplD	Uniprot_Pediococcus_pentosaceus_strain_ATCC.fasta	22763.2	1	11	15	45	0.000978	0.502	DFAQSLGNLNVDK	K	K	0.997	87.9	25	87.9	1420.71	3109.5	578622	138	150
sample Treatment	2022 5:30:55 PM;File Size: 1000722054 [Byte] (F057606)	50S ribosomal protein L4 OS=Pediococcus pentosaceus (strain ATCC 25745 / CCUG 21536 / LMG 10740 / 183-1w) OX=278197 GN=rplD PE=3 SV=1	RL4_PEDPA	rplD	Uniprot_Pediococcus_pentosaceus_strain_ATCC.fasta	22763.2	1	11	15	45	0.000978	0.502	DFAQSLGNLNVDKK	K	A	0.997	79.8	25	79.8	1548.8	2904	1465100	138	151
sample Treatment	2022 5:30:55 PM;File Size: 1000722054 [Byte] (F057606)	50S ribosomal protein L4 OS=Pediococcus pentosaceus (strain ATCC 25745 / CCUG 21536 / LMG 10740 / 183-1w) OX=278197 GN=rplD PE=3 SV=1	RL4_PEDPA	rplD	Uniprot_Pediococcus_pentosaceus_strain_ATCC.fasta	22763.2	1	11	15	45	0.000978	0.502	GGGIVFGPTPR	R	S	0.997	52.9	25	52.9	1057.58	2592	3781980	85	95
sample Treatment	2022 5:30:55 PM;File Size: 1000722054 [Byte] (F057606)	50S ribosomal protein L4 OS=Pediococcus pentosaceus (strain ATCC 25745 / CCUG 21536 / LMG 10740 / 183-1w) OX=278197 GN=rplD PE=3 SV=1	RL4_PEDPA	rplD	Uniprot_Pediococcus_pentosaceus_strain_ATCC.fasta	22763.2	1	11	15	45	0.000978	0.502	IVEPEGINVLDIMNSDK	K	L	0.997	93.8	25	93.8	1885.96	3852	336219	175	191
sample Treatment	2022 5:30:55 PM;File Size: 1000722054 [Byte] (F057606)	50S ribosomal protein L4 OS=Pediococcus pentosaceus (strain ATCC 25745 / CCUG 21536 / LMG 10740 / 183-1w) OX=278197 GN=rplD PE=3 SV=1	RL4_PEDPA	rplD	Uniprot_Pediococcus_pentosaceus_strain_ATCC.fasta	22763.2	1	11	15	45	0.000978	0.502	SYAYSIPK	R	K	0.99	41.2	25	41.2	928.477	2305	1585590	96	103
sample Treatment	2022 5:30:55 PM;File Size: 1000722054 [Byte] (F057606)	50S ribosomal protein L4 OS=Pediococcus pentosaceus (strain ATCC 25745 / CCUG 21536 / LMG 10740 / 183-1w) OX=278197 GN=rplD PE=3 SV=1	RL4_PEDPA	rplD	Uniprot_Pediococcus_pentosaceus_strain_ATCC.fasta	22763.2	1	11	15	45	0.000978	0.502	TKDFAQSLGNLNVDK	K	K	0.99	41.6	25	41.6	1649.85	2865.5	475200	136	150
sample Treatment	2022 5:30:55 PM;File Size: 1000722054 [Byte] (F057606)	50S ribosomal protein L4 OS=Pediococcus pentosaceus (strain ATCC 25745 / CCUG 21536 / LMG 10740 / 183-1w) OX=278197 GN=rplD PE=3 SV=1	RL4_PEDPA	rplD	Uniprot_Pediococcus_pentosaceus_strain_ATCC.fasta	22763.2	1	11	15	45	0.000978	0.502	VLDESLVVVDEFK	K	F	0.997	80	25	80	1491.79	3546	248142	118	130
sample Treatment	2022 5:30:55 PM;File Size: 1000722054 [Byte] (F057606)	50S ribosomal protein L4 OS=Pediococcus pentosaceus (strain ATCC 25745 / CCUG 21536 / LMG 10740 / 183-1w) OX=278197 GN=rplD PE=3 SV=1	RL4_PEDPA	rplD	Uniprot_Pediococcus_pentosaceus_strain_ATCC.fasta	22763.2	1	11	15	45	0.000978	0.502	VLDESLVVVDEFKFETPK	K	T	0.961	32.8	25	32.8	2094.1	3752	323818	118	135
sample Treatment	2022 5:30:55 PM;File Size: 1000722054 [Byte] (F057606)	Predicted nucleoside-diphosphate-sugar epimerase OS=Pediococcus pentosaceus (strain ATCC 25745 / CCUG 21536 / LMG 10740 / 183-1w) OX=278197 GN=PEPE_1708 PE=4 SV=1	Q03DJ3_PEDPA	PEPE_1708	Uniprot_Pediococcus_pentosaceus_strain_ATCC.fasta	23188.7	1	6	8	14	0.000304	0.362	DLLQTDAFGAVK	K	V	0.98	36.4	25	36.4	1277.67	3164	91674.6	77	88
sample Treatment	2022 5:30:55 PM;File Size: 1000722054 [Byte] (F057606)	Predicted nucleoside-diphosphate-sugar epimerase OS=Pediococcus pentosaceus (strain ATCC 25745 / CCUG 21536 / LMG 10740 / 183-1w) OX=278197 GN=PEPE_1708 PE=4 SV=1	Q03DJ3_PEDPA	PEPE_1708	Uniprot_Pediococcus_pentosaceus_strain_ATCC.fasta	23188.7	1	6	8	14	0.000304	0.362	DLVSDGHEVVAGAR	K	K	0.997	63.5	25	63.5	1424.71	2475.5	649709	19	32
sample Treatment	2022 5:30:55 PM;File Size: 1000722054 [Byte] (F057606)	Predicted nucleoside-diphosphate-sugar epimerase OS=Pediococcus pentosaceus (strain ATCC 25745 / CCUG 21536 / LMG 10740 / 183-1w) OX=278197 GN=PEPE_1708 PE=4 SV=1	Q03DJ3_PEDPA	PEPE_1708	Uniprot_Pediococcus_pentosaceus_strain_ATCC.fasta	23188.7	1	6	8	14	0.000304	0.362	EGLADLTDYNIAK	R	F	0.997	56.5	25	43.5	1422.71	3157	277946	118	130
sample Treatment	2022 5:30:55 PM;File Size: 1000722054 [Byte] (F057606)	Predicted nucleoside-diphosphate-sugar epimerase OS=Pediococcus pentosaceus (strain ATCC 25745 / CCUG 21536 / LMG 10740 / 183-1w) OX=278197 GN=PEPE_1708 PE=4 SV=1	Q03DJ3_PEDPA	PEPE_1708	Uniprot_Pediococcus_pentosaceus_strain_ATCC.fasta	23188.7	1	6	8	14	0.000304	0.362	GKDLLQTDAFGAVK	R	V	0.99	42	25	42	1462.79	2904	241945	75	88
sample Treatment	2022 5:30:55 PM;File Size: 1000722054 [Byte] (F057606)	Predicted nucleoside-diphosphate-sugar epimerase OS=Pediococcus pentosaceus (strain ATCC 25745 / CCUG 21536 / LMG 10740 / 183-1w) OX=278197 GN=PEPE_1708 PE=4 SV=1	Q03DJ3_PEDPA	PEPE_1708	Uniprot_Pediococcus_pentosaceus_strain_ATCC.fasta	23188.7	1	6	8	14	0.000304	0.362	IFVVGSTGR	K	V	0.92	29.1	25	27.7	935.531	2287	241504	3	11
sample Treatment	2022 5:30:55 PM;File Size: 1000722054 [Byte] (F057606)	Predicted nucleoside-diphosphate-sugar epimerase OS=Pediococcus pentosaceus (strain ATCC 25745 / CCUG 21536 / LMG 10740 / 183-1w) OX=278197 GN=PEPE_1708 PE=4 SV=1	Q03DJ3_PEDPA	PEPE_1708	Uniprot_Pediococcus_pentosaceus_strain_ATCC.fasta	23188.7	1	6	8	14	0.000304	0.362	VIELEHVTPVHFDLHDDVDEMTQSIK	R	D	0.996	30.9	25	30.9	3046.48	3656	40686.2	37	62
sample Treatment	2022 5:30:55 PM;File Size: 1000722054 [Byte] (F057606)	ATP-dependent Clp protease ATP-binding subunit ClpX OS=Pediococcus pentosaceus (strain ATCC 25745 / CCUG 21536 / LMG 10740 / 183-1w) OX=278197 GN=clpX PE=3 SV=1	CLPX_PEDPA	clpX	Uniprot_Pediococcus_pentosaceus_strain_ATCC.fasta	45898.4	1	7	7	11	0.000239	0.215	ADEDEPELQK	K	S	0.997	50.4	25	50.4	1173.53	1709.5	87344.2	105	114
sample Treatment	2022 5:30:55 PM;File Size: 1000722054 [Byte] (F057606)	ATP-dependent Clp protease ATP-binding subunit ClpX OS=Pediococcus pentosaceus (strain ATCC 25745 / CCUG 21536 / LMG 10740 / 183-1w) OX=278197 GN=clpX PE=3 SV=1	CLPX_PEDPA	clpX	Uniprot_Pediococcus_pentosaceus_strain_ATCC.fasta	45898.4	1	7	7	11	0.000239	0.215	DVSGEGVQQALLK	R	I	0.997	91.1	25	91.1	1343.72	2712.5	170210	203	215
sample Treatment	2022 5:30:55 PM;File Size: 1000722054 [Byte] (F057606)	ATP-dependent Clp protease ATP-binding subunit ClpX OS=Pediococcus pentosaceus (strain ATCC 25745 / CCUG 21536 / LMG 10740 / 183-1w) OX=278197 GN=clpX PE=3 SV=1	CLPX_PEDPA	clpX	Uniprot_Pediococcus_pentosaceus_strain_ATCC.fasta	45898.4	1	7	7	11	0.000239	0.215	IIAGPDVYICNECVDLCK	K	E	0.997	56.2	25	56.2	2138.99	3256	13739.6	26	43
sample Treatment	2022 5:30:55 PM;File Size: 1000722054 [Byte] (F057606)	ATP-dependent Clp protease ATP-binding subunit ClpX OS=Pediococcus pentosaceus (strain ATCC 25745 / CCUG 21536 / LMG 10740 / 183-1w) OX=278197 GN=clpX PE=3 SV=1	CLPX_PEDPA	clpX	Uniprot_Pediococcus_pentosaceus_strain_ATCC.fasta	45898.4	1	7	7	11	0.000239	0.215	LLQNADYNVEAAER	K	G	0.997	55.1	25	55.1	1605.79	2441.5	91213.6	167	180
sample Treatment	2022 5:30:55 PM;File Size: 1000722054 [Byte] (F057606)	ATP-dependent Clp protease ATP-binding subunit ClpX OS=Pediococcus pentosaceus (strain ATCC 25745 / CCUG 21536 / LMG 10740 / 183-1w) OX=278197 GN=clpX PE=3 SV=1	CLPX_PEDPA	clpX	Uniprot_Pediococcus_pentosaceus_strain_ATCC.fasta	45898.4	1	7	7	11	0.000239	0.215	LTEEDLVHILTEPK	K	N	0.997	54.3	25	54.3	1636.88	3736	152769	316	329
sample Treatment	2022 5:30:55 PM;File Size: 1000722054 [Byte] (F057606)	ATP-dependent Clp protease ATP-binding subunit ClpX OS=Pediococcus pentosaceus (strain ATCC 25745 / CCUG 21536 / LMG 10740 / 183-1w) OX=278197 GN=clpX PE=3 SV=1	CLPX_PEDPA	clpX	Uniprot_Pediococcus_pentosaceus_strain_ATCC.fasta	45898.4	1	7	7	11	0.000239	0.215	SIIENVMR	R	D	0.937	30.2	25	30.2	961.514	2789	53153	373	380
sample Treatment	2022 5:30:55 PM;File Size: 1000722054 [Byte] (F057606)	ATP-dependent Clp protease ATP-binding subunit ClpX OS=Pediococcus pentosaceus (strain ATCC 25745 / CCUG 21536 / LMG 10740 / 183-1w) OX=278197 GN=clpX PE=3 SV=1	CLPX_PEDPA	clpX	Uniprot_Pediococcus_pentosaceus_strain_ATCC.fasta	45898.4	1	7	7	11	0.000239	0.215	SNISLIGPTGSGK	K	T	0.939	30.4	25	30.4	1230.67	2477	59012.5	115	127
sample Treatment	2022 5:30:55 PM;File Size: 1000722054 [Byte] (F057606)	Metal-dependent hydrolase of the beta-lactamase superfamily III OS=Pediococcus pentosaceus (strain ATCC 25745 / CCUG 21536 / LMG 10740 / 183-1w) OX=278197 GN=PEPE_1208 PE=4 SV=1	Q03EW0_PEDPA	PEPE_1208	Uniprot_Pediococcus_pentosaceus_strain_ATCC.fasta	27591.1	1	2	2	4	8.7e-05	0.135	FATNSDLLVTDTNFLSNHTGIK	K	W	0.972	34.6	25	34.6	2408.21	3641	120676	165	186
sample Treatment	2022 5:30:55 PM;File Size: 1000722054 [Byte] (F057606)	Metal-dependent hydrolase of the beta-lactamase superfamily III OS=Pediococcus pentosaceus (strain ATCC 25745 / CCUG 21536 / LMG 10740 / 183-1w) OX=278197 GN=PEPE_1208 PE=4 SV=1	Q03EW0_PEDPA	PEPE_1208	Uniprot_Pediococcus_pentosaceus_strain_ATCC.fasta	27591.1	1	2	2	4	8.7e-05	0.135	TIHPVPAFATR	K	I	0.997	63.9	25	63.9	1209.67	2420.5	144186	130	140
sample Treatment	2022 5:30:55 PM;File Size: 1000722054 [Byte] (F057606)	PTS system D-fructose-specific IIC component (F1P-forming), Frc family / PTS system D-fructose-specific IIB component (F1P-forming), Frc family / PTS system D-fructose-specific IIA component (F1P-f... OS=Pediococcus pentosaceus (strain ATCC 25745 / CCUG 21536 / LMG 10740 / 183-1w) OX=278197 GN=PEPE_1164 PE=4 SV=1	Q03F04_PEDPA	PEPE_1164	Uniprot_Pediococcus_pentosaceus_strain_ATCC.fasta	67239.7	1	4	4	6	0.00013	0.0722	FDGKPLLNRPVIDGINK	R	A	0.973	27.3	25	27.3	1896.07	2823	139969	244	260
sample Treatment	2022 5:30:55 PM;File Size: 1000722054 [Byte] (F057606)	PTS system D-fructose-specific IIC component (F1P-forming), Frc family / PTS system D-fructose-specific IIB component (F1P-forming), Frc family / PTS system D-fructose-specific IIA component (F1P-f... OS=Pediococcus pentosaceus (strain ATCC 25745 / CCUG 21536 / LMG 10740 / 183-1w) OX=278197 GN=PEPE_1164 PE=4 SV=1	Q03F04_PEDPA	PEPE_1164	Uniprot_Pediococcus_pentosaceus_strain_ATCC.fasta	67239.7	1	4	4	6	0.00013	0.0722	LSSLLIDPELVGK	K	L	0.997	78.1	25	63.4	1383.81	3573.5	307966	120	132
sample Treatment	2022 5:30:55 PM;File Size: 1000722054 [Byte] (F057606)	PTS system D-fructose-specific IIC component (F1P-forming), Frc family / PTS system D-fructose-specific IIB component (F1P-forming), Frc family / PTS system D-fructose-specific IIA component (F1P-f... OS=Pediococcus pentosaceus (strain ATCC 25745 / CCUG 21536 / LMG 10740 / 183-1w) OX=278197 GN=PEPE_1164 PE=4 SV=1	Q03F04_PEDPA	PEPE_1164	Uniprot_Pediococcus_pentosaceus_strain_ATCC.fasta	67239.7	1	4	4	6	0.00013	0.0722	LTNEDIER	R	A	0.978	35.8	25	35.8	989.49	1673	382215	220	227
sample Treatment	2022 5:30:55 PM;File Size: 1000722054 [Byte] (F057606)	PTS system D-fructose-specific IIC component (F1P-forming), Frc family / PTS system D-fructose-specific IIB component (F1P-forming), Frc family / PTS system D-fructose-specific IIA component (F1P-f... OS=Pediococcus pentosaceus (strain ATCC 25745 / CCUG 21536 / LMG 10740 / 183-1w) OX=278197 GN=PEPE_1164 PE=4 SV=1	Q03F04_PEDPA	PEPE_1164	Uniprot_Pediococcus_pentosaceus_strain_ATCC.fasta	67239.7	1	4	4	6	0.00013	0.0722	NLMIMDLK	K	A	0.967	33.6	25	32.9	977.516	3316	44278.7	10	17
sample Treatment	2022 5:30:55 PM;File Size: 1000722054 [Byte] (F057606)	50S ribosomal protein L24 OS=Pediococcus pentosaceus (strain ATCC 25745 / CCUG 21536 / LMG 10740 / 183-1w) OX=278197 GN=rplX PE=3 SV=1	RL24_PEDPA	rplX	Uniprot_Pediococcus_pentosaceus_strain_ATCC.fasta	11229	1	2	3	4	8.7e-05	0.369	HQKPNNANPQGGILDVEAPMDVSNVMLIDPSTNEPTR	K	V	0.997	93.4	25	93.4	3998.93	3734	518086	44	80
sample Treatment	2022 5:30:55 PM;File Size: 1000722054 [Byte] (F057606)	50S ribosomal protein L24 OS=Pediococcus pentosaceus (strain ATCC 25745 / CCUG 21536 / LMG 10740 / 183-1w) OX=278197 GN=rplX PE=3 SV=1	RL24_PEDPA	rplX	Uniprot_Pediococcus_pentosaceus_strain_ATCC.fasta	11229	1	2	3	4	8.7e-05	0.369	KHQKPNNANPQGGILDVEAPMDVSNVMLIDPSTNEPTR	K	V	0.997	53.9	25	53.9	4127.03	3655	153241	43	80
sample Treatment	2022 5:30:55 PM;File Size: 1000722054 [Byte] (F057606)	Dihydroxyacetone kinase related enzyme OS=Pediococcus pentosaceus (strain ATCC 25745 / CCUG 21536 / LMG 10740 / 183-1w) OX=278197 GN=PEPE_0838 PE=4 SV=1	Q03FX4_PEDPA	PEPE_0838	Uniprot_Pediococcus_pentosaceus_strain_ATCC.fasta	60742.7	1	8	10	17	0.00037	0.221	ATLNAEDLAEAVAEGAK	K	T	0.997	108	25	108	1672.84	3547	193246	105	121
sample Treatment	2022 5:30:55 PM;File Size: 1000722054 [Byte] (F057606)	Dihydroxyacetone kinase related enzyme OS=Pediococcus pentosaceus (strain ATCC 25745 / CCUG 21536 / LMG 10740 / 183-1w) OX=278197 GN=PEPE_0838 PE=4 SV=1	Q03FX4_PEDPA	PEPE_0838	Uniprot_Pediococcus_pentosaceus_strain_ATCC.fasta	60742.7	1	8	10	17	0.00037	0.221	AVMKPTEGTILTVVR	K	E	0.997	60.7	25	60.7	1614.92	2976	232276	126	140
sample Treatment	2022 5:30:55 PM;File Size: 1000722054 [Byte] (F057606)	Dihydroxyacetone kinase related enzyme OS=Pediococcus pentosaceus (strain ATCC 25745 / CCUG 21536 / LMG 10740 / 183-1w) OX=278197 GN=PEPE_0838 PE=4 SV=1	Q03FX4_PEDPA	PEPE_0838	Uniprot_Pediococcus_pentosaceus_strain_ATCC.fasta	60742.7	1	8	10	17	0.00037	0.221	GNSGVILSQIFR	R	G	0.997	64.7	25	64.7	1290.72	3647.5	206469	84	95
sample Treatment	2022 5:30:55 PM;File Size: 1000722054 [Byte] (F057606)	Dihydroxyacetone kinase related enzyme OS=Pediococcus pentosaceus (strain ATCC 25745 / CCUG 21536 / LMG 10740 / 183-1w) OX=278197 GN=PEPE_0838 PE=4 SV=1	Q03FX4_PEDPA	PEPE_0838	Uniprot_Pediococcus_pentosaceus_strain_ATCC.fasta	60742.7	1	8	10	17	0.00037	0.221	SGQVTIAVR	K	D	0.997	55.5	25	55.5	930.537	2062	139030	460	468
sample Treatment	2022 5:30:55 PM;File Size: 1000722054 [Byte] (F057606)	Dihydroxyacetone kinase related enzyme OS=Pediococcus pentosaceus (strain ATCC 25745 / CCUG 21536 / LMG 10740 / 183-1w) OX=278197 GN=PEPE_0838 PE=4 SV=1	Q03FX4_PEDPA	PEPE_0838	Uniprot_Pediococcus_pentosaceus_strain_ATCC.fasta	60742.7	1	8	10	17	0.00037	0.221	TTDLLPVLK	K	E	0.997	53.3	25	53.3	999.609	3216.5	167636	174	182
sample Treatment	2022 5:30:55 PM;File Size: 1000722054 [Byte] (F057606)	Dihydroxyacetone kinase related enzyme OS=Pediococcus pentosaceus (strain ATCC 25745 / CCUG 21536 / LMG 10740 / 183-1w) OX=278197 GN=PEPE_0838 PE=4 SV=1	Q03FX4_PEDPA	PEPE_0838	Uniprot_Pediococcus_pentosaceus_strain_ATCC.fasta	60742.7	1	8	10	17	0.00037	0.221	VHVHTEHPGEVLAWGQQFGDITK	K	I	0.997	58	25	58	2585.29	3206	370906	292	314
sample Treatment	2022 5:30:55 PM;File Size: 1000722054 [Byte] (F057606)	Dihydroxyacetone kinase related enzyme OS=Pediococcus pentosaceus (strain ATCC 25745 / CCUG 21536 / LMG 10740 / 183-1w) OX=278197 GN=PEPE_0838 PE=4 SV=1	Q03FX4_PEDPA	PEPE_0838	Uniprot_Pediococcus_pentosaceus_strain_ATCC.fasta	60742.7	1	8	10	17	0.00037	0.221	WQQEEIMEQDETPTASSASK	R	E	0.993	44.8	25	44.8	2295.01	2536.5	48255.7	322	341
sample Treatment	2022 5:30:55 PM;File Size: 1000722054 [Byte] (F057606)	Dihydroxyacetone kinase related enzyme OS=Pediococcus pentosaceus (strain ATCC 25745 / CCUG 21536 / LMG 10740 / 183-1w) OX=278197 GN=PEPE_0838 PE=4 SV=1	Q03FX4_PEDPA	PEPE_0838	Uniprot_Pediococcus_pentosaceus_strain_ATCC.fasta	60742.7	1	8	10	17	0.00037	0.221	YENDDASLEVGHLAASLAK	K	G	0.997	67.5	25	67.5	2002.97	3331.5	208069	58	76
sample Treatment	2022 5:30:55 PM;File Size: 1000722054 [Byte] (F057606)	50S ribosomal protein L17 OS=Pediococcus pentosaceus (strain ATCC 25745 / CCUG 21536 / LMG 10740 / 183-1w) OX=278197 GN=rplQ PE=3 SV=1	RL17_PEDPA	rplQ	Uniprot_Pediococcus_pentosaceus_strain_ATCC.fasta	14239.7	1	5	6	18	0.000391	0.425	DLTTELIVNEK	R	I	0.997	50.8	25	50.8	1274.68	2980	871567	19	29
sample Treatment	2022 5:30:55 PM;File Size: 1000722054 [Byte] (F057606)	50S ribosomal protein L17 OS=Pediococcus pentosaceus (strain ATCC 25745 / CCUG 21536 / LMG 10740 / 183-1w) OX=278197 GN=rplQ PE=3 SV=1	RL17_PEDPA	rplQ	Uniprot_Pediococcus_pentosaceus_strain_ATCC.fasta	14239.7	1	5	6	18	0.000391	0.425	IVTTEAR	K	A	0.9	49.8	25	49.3	789.447	1265	230192	30	36
sample Treatment	2022 5:30:55 PM;File Size: 1000722054 [Byte] (F057606)	50S ribosomal protein L17 OS=Pediococcus pentosaceus (strain ATCC 25745 / CCUG 21536 / LMG 10740 / 183-1w) OX=278197 GN=rplQ PE=3 SV=1	RL17_PEDPA	rplQ	Uniprot_Pediococcus_pentosaceus_strain_ATCC.fasta	14239.7	1	5	6	18	0.000391	0.425	LFADLAPR	K	Y	0.99	47.3	25	31.7	902.51	2796.5	1324160	89	96
sample Treatment	2022 5:30:55 PM;File Size: 1000722054 [Byte] (F057606)	50S ribosomal protein L17 OS=Pediococcus pentosaceus (strain ATCC 25745 / CCUG 21536 / LMG 10740 / 183-1w) OX=278197 GN=rplQ PE=3 SV=1	RL17_PEDPA	rplQ	Uniprot_Pediococcus_pentosaceus_strain_ATCC.fasta	14239.7	1	5	6	18	0.000391	0.425	NVVADVTEDGEDVK	R	V	0.997	73.3	25	73.3	1489.7	2542.5	810901	68	81
sample Treatment	2022 5:30:55 PM;File Size: 1000722054 [Byte] (F057606)	50S ribosomal protein L17 OS=Pediococcus pentosaceus (strain ATCC 25745 / CCUG 21536 / LMG 10740 / 183-1w) OX=278197 GN=rplQ PE=3 SV=1	RL17_PEDPA	rplQ	Uniprot_Pediococcus_pentosaceus_strain_ATCC.fasta	14239.7	1	5	6	18	0.000391	0.425	RGDGAPMVVLELVD	R	-	0.992	42.7	25	42.7	1470.76	3855.5	191341	114	127
sample Treatment	2022 5:30:55 PM;File Size: 1000722054 [Byte] (F057606)	DNA-directed RNA polymerase subunit beta OS=Pediococcus pentosaceus (strain ATCC 25745 / CCUG 21536 / LMG 10740 / 183-1w) OX=278197 GN=rpoB PE=3 SV=1	RPOB_PEDPA	rpoB	Uniprot_Pediococcus_pentosaceus_strain_ATCC.fasta	134622	1	39	44	95	0.00207	0.399	AAHDSGVALLCQHAGVVEYVDAR	K	E	0.997	76.4	25	76.4	2438.19	3040	648197	671	693
sample Treatment	2022 5:30:55 PM;File Size: 1000722054 [Byte] (F057606)	DNA-directed RNA polymerase subunit beta OS=Pediococcus pentosaceus (strain ATCC 25745 / CCUG 21536 / LMG 10740 / 183-1w) OX=278197 GN=rpoB PE=3 SV=1	RPOB_PEDPA	rpoB	Uniprot_Pediococcus_pentosaceus_strain_ATCC.fasta	134622	1	39	44	95	0.00207	0.399	APSTESAPVETK	K	N	0.997	89.5	25	89.5	1216.61	1531	455888	1187	1198
sample Treatment	2022 5:30:55 PM;File Size: 1000722054 [Byte] (F057606)	DNA-directed RNA polymerase subunit beta OS=Pediococcus pentosaceus (strain ATCC 25745 / CCUG 21536 / LMG 10740 / 183-1w) OX=278197 GN=rpoB PE=3 SV=1	RPOB_PEDPA	rpoB	Uniprot_Pediococcus_pentosaceus_strain_ATCC.fasta	134622	1	39	44	95	0.00207	0.399	DDVYTSIHIEEYESEAR	R	D	0.997	55.9	25	55.9	2055.91	2911	201771	781	797
sample Treatment	2022 5:30:55 PM;File Size: 1000722054 [Byte] (F057606)	DNA-directed RNA polymerase subunit beta OS=Pediococcus pentosaceus (strain ATCC 25745 / CCUG 21536 / LMG 10740 / 183-1w) OX=278197 GN=rpoB PE=3 SV=1	RPOB_PEDPA	rpoB	Uniprot_Pediococcus_pentosaceus_strain_ATCC.fasta	134622	1	39	44	95	0.00207	0.399	DMDEEDDDVVNVDALSK	R	Y	0.997	95.4	25	95.4	1908.8	2922.5	61211.1	1153	1169
sample Treatment	2022 5:30:55 PM;File Size: 1000722054 [Byte] (F057606)	DNA-directed RNA polymerase subunit beta OS=Pediococcus pentosaceus (strain ATCC 25745 / CCUG 21536 / LMG 10740 / 183-1w) OX=278197 GN=rpoB PE=3 SV=1	RPOB_PEDPA	rpoB	Uniprot_Pediococcus_pentosaceus_strain_ATCC.fasta	134622	1	39	44	95	0.00207	0.399	EHEANYSAPLHVTLR	R	L	0.997	63.4	25	63.4	1736.87	2562	917605	83	97
sample Treatment	2022 5:30:55 PM;File Size: 1000722054 [Byte] (F057606)	DNA-directed RNA polymerase subunit beta OS=Pediococcus pentosaceus (strain ATCC 25745 / CCUG 21536 / LMG 10740 / 183-1w) OX=278197 GN=rpoB PE=3 SV=1	RPOB_PEDPA	rpoB	Uniprot_Pediococcus_pentosaceus_strain_ATCC.fasta	134622	1	39	44	95	0.00207	0.399	EIPNIGEDALR	R	N	0.991	42.3	25	42.3	1226.64	2844.5	367768	809	819
sample Treatment	2022 5:30:55 PM;File Size: 1000722054 [Byte] (F057606)	DNA-directed RNA polymerase subunit beta OS=Pediococcus pentosaceus (strain ATCC 25745 / CCUG 21536 / LMG 10740 / 183-1w) OX=278197 GN=rpoB PE=3 SV=1	RPOB_PEDPA	rpoB	Uniprot_Pediococcus_pentosaceus_strain_ATCC.fasta	134622	1	39	44	95	0.00207	0.399	ELQALGLDMK	K	V	0.996	49.5	25	49.5	1117.59	3041.5	256548	1131	1140
sample Treatment	2022 5:30:55 PM;File Size: 1000722054 [Byte] (F057606)	DNA-directed RNA polymerase subunit beta OS=Pediococcus pentosaceus (strain ATCC 25745 / CCUG 21536 / LMG 10740 / 183-1w) OX=278197 GN=rpoB PE=3 SV=1	RPOB_PEDPA	rpoB	Uniprot_Pediococcus_pentosaceus_strain_ATCC.fasta	134622	1	39	44	95	0.00207	0.399	GAWLEYETDAK	R	E	0.997	58.8	25	58.8	1282.6	2769.5	496295	167	177
sample Treatment	2022 5:30:55 PM;File Size: 1000722054 [Byte] (F057606)	DNA-directed RNA polymerase subunit beta OS=Pediococcus pentosaceus (strain ATCC 25745 / CCUG 21536 / LMG 10740 / 183-1w) OX=278197 GN=rpoB PE=3 SV=1	RPOB_PEDPA	rpoB	Uniprot_Pediococcus_pentosaceus_strain_ATCC.fasta	134622	1	39	44	95	0.00207	0.399	GVTELSAEER	K	L	0.995	47.5	25	47.5	1090.54	1933.5	570810	847	856
sample Treatment	2022 5:30:55 PM;File Size: 1000722054 [Byte] (F057606)	DNA-directed RNA polymerase subunit beta OS=Pediococcus pentosaceus (strain ATCC 25745 / CCUG 21536 / LMG 10740 / 183-1w) OX=278197 GN=rpoB PE=3 SV=1	RPOB_PEDPA	rpoB	Uniprot_Pediococcus_pentosaceus_strain_ATCC.fasta	134622	1	39	44	95	0.00207	0.399	HESDNIETSIENVDYMDVSPK	R	Q	0.997	66.9	25	66.9	2422.07	3202	126662	601	621
sample Treatment	2022 5:30:55 PM;File Size: 1000722054 [Byte] (F057606)	DNA-directed RNA polymerase subunit beta OS=Pediococcus pentosaceus (strain ATCC 25745 / CCUG 21536 / LMG 10740 / 183-1w) OX=278197 GN=rpoB PE=3 SV=1	RPOB_PEDPA	rpoB	Uniprot_Pediococcus_pentosaceus_strain_ATCC.fasta	134622	1	39	44	95	0.00207	0.399	IWGTTVIPNR	K	G	0.997	59.9	25	55.3	1156.65	2822.5	390977	157	166
sample Treatment	2022 5:30:55 PM;File Size: 1000722054 [Byte] (F057606)	DNA-directed RNA polymerase subunit beta OS=Pediococcus pentosaceus (strain ATCC 25745 / CCUG 21536 / LMG 10740 / 183-1w) OX=278197 GN=rpoB PE=3 SV=1	RPOB_PEDPA	rpoB	Uniprot_Pediococcus_pentosaceus_strain_ATCC.fasta	134622	1	39	44	95	0.00207	0.399	KIPMTELVR	R	A	0.995	48.4	25	48.4	1086.63	2568	112315	189	197
sample Treatment	2022 5:30:55 PM;File Size: 1000722054 [Byte] (F057606)	DNA-directed RNA polymerase subunit beta OS=Pediococcus pentosaceus (strain ATCC 25745 / CCUG 21536 / LMG 10740 / 183-1w) OX=278197 GN=rpoB PE=3 SV=1	RPOB_PEDPA	rpoB	Uniprot_Pediococcus_pentosaceus_strain_ATCC.fasta	134622	1	39	44	95	0.00207	0.399	KIWGTTVIPNR	R	G	0.996	48.5	25	48.5	1284.74	2604	80733.8	156	166
sample Treatment	2022 5:30:55 PM;File Size: 1000722054 [Byte] (F057606)	DNA-directed RNA polymerase subunit beta OS=Pediococcus pentosaceus (strain ATCC 25745 / CCUG 21536 / LMG 10740 / 183-1w) OX=278197 GN=rpoB PE=3 SV=1	RPOB_PEDPA	rpoB	Uniprot_Pediococcus_pentosaceus_strain_ATCC.fasta	134622	1	39	44	95	0.00207	0.399	LAVFLDRPDFK	K	M	0.958	32.4	25	32.4	1320.73	3108	141063	323	333
sample Treatment	2022 5:30:55 PM;File Size: 1000722054 [Byte] (F057606)	DNA-directed RNA polymerase subunit beta OS=Pediococcus pentosaceus (strain ATCC 25745 / CCUG 21536 / LMG 10740 / 183-1w) OX=278197 GN=rpoB PE=3 SV=1	RPOB_PEDPA	rpoB	Uniprot_Pediococcus_pentosaceus_strain_ATCC.fasta	134622	1	39	44	95	0.00207	0.399	LLGQTLAETLADPDTGEVIAQK	R	G	0.997	77.2	25	77.2	2283.21	3657.5	1086320	290	311
sample Treatment	2022 5:30:55 PM;File Size: 1000722054 [Byte] (F057606)	DNA-directed RNA polymerase subunit beta OS=Pediococcus pentosaceus (strain ATCC 25745 / CCUG 21536 / LMG 10740 / 183-1w) OX=278197 GN=rpoB PE=3 SV=1	RPOB_PEDPA	rpoB	Uniprot_Pediococcus_pentosaceus_strain_ATCC.fasta	134622	1	39	44	95	0.00207	0.399	LLHAIFGEK	R	A	0.994	45.3	25	45.3	1027.59	2645	153965	857	865
sample Treatment	2022 5:30:55 PM;File Size: 1000722054 [Byte] (F057606)	DNA-directed RNA polymerase subunit beta OS=Pediococcus pentosaceus (strain ATCC 25745 / CCUG 21536 / LMG 10740 / 183-1w) OX=278197 GN=rpoB PE=3 SV=1	RPOB_PEDPA	rpoB	Uniprot_Pediococcus_pentosaceus_strain_ATCC.fasta	134622	1	39	44	95	0.00207	0.399	LSALGPGGLTR	R	D	0.997	50.6	25	50.6	1041.61	2502	878214	491	501
sample Treatment	2022 5:30:55 PM;File Size: 1000722054 [Byte] (F057606)	DNA-directed RNA polymerase subunit beta OS=Pediococcus pentosaceus (strain ATCC 25745 / CCUG 21536 / LMG 10740 / 183-1w) OX=278197 GN=rpoB PE=3 SV=1	RPOB_PEDPA	rpoB	Uniprot_Pediococcus_pentosaceus_strain_ATCC.fasta	134622	1	39	44	95	0.00207	0.399	MCPIETPEGPNIGLINNLASYGK	R	I	0.975	35.2	25	35.2	2488.22	3787.5	22879.9	519	541
sample Treatment	2022 5:30:55 PM;File Size: 1000722054 [Byte] (F057606)	DNA-directed RNA polymerase subunit beta OS=Pediococcus pentosaceus (strain ATCC 25745 / CCUG 21536 / LMG 10740 / 183-1w) OX=278197 GN=rpoB PE=3 SV=1	RPOB_PEDPA	rpoB	Uniprot_Pediococcus_pentosaceus_strain_ATCC.fasta	134622	1	39	44	95	0.00207	0.399	MSIQDAETVTPQQLINIRPVVAATK	R	E	0.99	41.8	25	41.8	2723.48	3661	59482.5	440	464
sample Treatment	2022 5:30:55 PM;File Size: 1000722054 [Byte] (F057606)	DNA-directed RNA polymerase subunit beta OS=Pediococcus pentosaceus (strain ATCC 25745 / CCUG 21536 / LMG 10740 / 183-1w) OX=278197 GN=rpoB PE=3 SV=1	RPOB_PEDPA	rpoB	Uniprot_Pediococcus_pentosaceus_strain_ATCC.fasta	134622	1	39	44	95	0.00207	0.399	NLDQDGIVR	R	V	0.932	29.9	25	29.9	1029.53	2064	119438	820	828
sample Treatment	2022 5:30:55 PM;File Size: 1000722054 [Byte] (F057606)	DNA-directed RNA polymerase subunit beta OS=Pediococcus pentosaceus (strain ATCC 25745 / CCUG 21536 / LMG 10740 / 183-1w) OX=278197 GN=rpoB PE=3 SV=1	RPOB_PEDPA	rpoB	Uniprot_Pediococcus_pentosaceus_strain_ATCC.fasta	134622	1	39	44	95	0.00207	0.399	NLGIHMTTPVFDGAQDK	R	D	0.987	39.8	25	39.8	1843.9	3058	69748.8	979	995
sample Treatment	2022 5:30:55 PM;File Size: 1000722054 [Byte] (F057606)	DNA-directed RNA polymerase subunit beta OS=Pediococcus pentosaceus (strain ATCC 25745 / CCUG 21536 / LMG 10740 / 183-1w) OX=278197 GN=rpoB PE=3 SV=1	RPOB_PEDPA	rpoB	Uniprot_Pediococcus_pentosaceus_strain_ATCC.fasta	134622	1	39	44	95	0.00207	0.399	QVVAVATACIPFLENDDSNR	K	A	0.997	76	25	76	2219.08	3629	216424	622	641
sample Treatment	2022 5:30:55 PM;File Size: 1000722054 [Byte] (F057606)	DNA-directed RNA polymerase subunit beta OS=Pediococcus pentosaceus (strain ATCC 25745 / CCUG 21536 / LMG 10740 / 183-1w) OX=278197 GN=rpoB PE=3 SV=1	RPOB_PEDPA	rpoB	Uniprot_Pediococcus_pentosaceus_strain_ATCC.fasta	134622	1	39	44	95	0.00207	0.399	RDDGALDTYK	R	L	0.987	39.2	25	36.1	1153.55	1715.5	89366.4	699	708
sample Treatment	2022 5:30:55 PM;File Size: 1000722054 [Byte] (F057606)	DNA-directed RNA polymerase subunit beta OS=Pediococcus pentosaceus (strain ATCC 25745 / CCUG 21536 / LMG 10740 / 183-1w) OX=278197 GN=rpoB PE=3 SV=1	RPOB_PEDPA	rpoB	Uniprot_Pediococcus_pentosaceus_strain_ATCC.fasta	134622	1	39	44	95	0.00207	0.399	SIGPYSLVTQQPLGGK	R	A	0.997	88.9	25	88.9	1644.9	3163	568877	1049	1064
sample Treatment	2022 5:30:55 PM;File Size: 1000722054 [Byte] (F057606)	DNA-directed RNA polymerase subunit beta OS=Pediococcus pentosaceus (strain ATCC 25745 / CCUG 21536 / LMG 10740 / 183-1w) OX=278197 GN=rpoB PE=3 SV=1	RPOB_PEDPA	rpoB	Uniprot_Pediococcus_pentosaceus_strain_ATCC.fasta	134622	1	39	44	95	0.00207	0.399	SPGVYYNLDTDK	R	N	0.997	69	25	69	1371.64	2464.5	195254	141	152
sample Treatment	2022 5:30:55 PM;File Size: 1000722054 [Byte] (F057606)	DNA-directed RNA polymerase subunit beta OS=Pediococcus pentosaceus (strain ATCC 25745 / CCUG 21536 / LMG 10740 / 183-1w) OX=278197 GN=rpoB PE=3 SV=1	RPOB_PEDPA	rpoB	Uniprot_Pediococcus_pentosaceus_strain_ATCC.fasta	134622	1	39	44	95	0.00207	0.399	SPGVYYNLDTDKNNR	R	K	0.996	52	25	52	1755.83	2245.5	298603	141	155
sample Treatment	2022 5:30:55 PM;File Size: 1000722054 [Byte] (F057606)	DNA-directed RNA polymerase subunit beta OS=Pediococcus pentosaceus (strain ATCC 25745 / CCUG 21536 / LMG 10740 / 183-1w) OX=278197 GN=rpoB PE=3 SV=1	RPOB_PEDPA	rpoB	Uniprot_Pediococcus_pentosaceus_strain_ATCC.fasta	134622	1	39	44	95	0.00207	0.399	SVGELLQNQFR	R	I	0.994	45.6	25	45.6	1290.68	3083	630761	416	426
sample Treatment	2022 5:30:55 PM;File Size: 1000722054 [Byte] (F057606)	DNA-directed RNA polymerase subunit beta OS=Pediococcus pentosaceus (strain ATCC 25745 / CCUG 21536 / LMG 10740 / 183-1w) OX=278197 GN=rpoB PE=3 SV=1	RPOB_PEDPA	rpoB	Uniprot_Pediococcus_pentosaceus_strain_ATCC.fasta	134622	1	39	44	95	0.00207	0.399	SVLYDGR	K	T	0.9	47.8	25	47.8	809.415	1834.5	247592	1012	1018
sample Treatment	2022 5:30:55 PM;File Size: 1000722054 [Byte] (F057606)	DNA-directed RNA polymerase subunit beta OS=Pediococcus pentosaceus (strain ATCC 25745 / CCUG 21536 / LMG 10740 / 183-1w) OX=278197 GN=rpoB PE=3 SV=1	RPOB_PEDPA	rpoB	Uniprot_Pediococcus_pentosaceus_strain_ATCC.fasta	134622	1	39	44	95	0.00207	0.399	TGEPFEQR	R	V	0.99	59.9	25	59.9	963.453	1799.5	328183	1019	1026
sample Treatment	2022 5:30:55 PM;File Size: 1000722054 [Byte] (F057606)	DNA-directed RNA polymerase subunit beta OS=Pediococcus pentosaceus (strain ATCC 25745 / CCUG 21536 / LMG 10740 / 183-1w) OX=278197 GN=rpoB PE=3 SV=1	RPOB_PEDPA	rpoB	Uniprot_Pediococcus_pentosaceus_strain_ATCC.fasta	134622	1	39	44	95	0.00207	0.399	TNASAEEAKAPSTESAPVETK	K	N	0.995	47.9	25	47.9	2118.02	1804	85834.1	1178	1198
sample Treatment	2022 5:30:55 PM;File Size: 1000722054 [Byte] (F057606)	DNA-directed RNA polymerase subunit beta OS=Pediococcus pentosaceus (strain ATCC 25745 / CCUG 21536 / LMG 10740 / 183-1w) OX=278197 GN=rpoB PE=3 SV=1	RPOB_PEDPA	rpoB	Uniprot_Pediococcus_pentosaceus_strain_ATCC.fasta	134622	1	39	44	95	0.00207	0.399	TYEAIVK	K	G	0.9	29.8	25	29.8	823.456	1938	69621.7	1106	1112
sample Treatment	2022 5:30:55 PM;File Size: 1000722054 [Byte] (F057606)	DNA-directed RNA polymerase subunit beta OS=Pediococcus pentosaceus (strain ATCC 25745 / CCUG 21536 / LMG 10740 / 183-1w) OX=278197 GN=rpoB PE=3 SV=1	RPOB_PEDPA	rpoB	Uniprot_Pediococcus_pentosaceus_strain_ATCC.fasta	134622	1	39	44	95	0.00207	0.399	VAESLKDIYER	R	L	0.987	39.9	25	39.9	1322.7	2463.5	251777	234	244
sample Treatment	2022 5:30:55 PM;File Size: 1000722054 [Byte] (F057606)	DNA-directed RNA polymerase subunit beta OS=Pediococcus pentosaceus (strain ATCC 25745 / CCUG 21536 / LMG 10740 / 183-1w) OX=278197 GN=rpoB PE=3 SV=1	RPOB_PEDPA	rpoB	Uniprot_Pediococcus_pentosaceus_strain_ATCC.fasta	134622	1	39	44	95	0.00207	0.399	VGAEVEDGDILVGK	R	V	0.997	75	25	75	1400.73	2736	420400	829	842
sample Treatment	2022 5:30:55 PM;File Size: 1000722054 [Byte] (F057606)	DNA-directed RNA polymerase subunit beta OS=Pediococcus pentosaceus (strain ATCC 25745 / CCUG 21536 / LMG 10740 / 183-1w) OX=278197 GN=rpoB PE=3 SV=1	RPOB_PEDPA	rpoB	Uniprot_Pediococcus_pentosaceus_strain_ATCC.fasta	134622	1	39	44	95	0.00207	0.399	VIVSQLVR	R	S	0.99	53.3	25	46.3	913.583	2567.5	718059	133	140
sample Treatment	2022 5:30:55 PM;File Size: 1000722054 [Byte] (F057606)	DNA-directed RNA polymerase subunit beta OS=Pediococcus pentosaceus (strain ATCC 25745 / CCUG 21536 / LMG 10740 / 183-1w) OX=278197 GN=rpoB PE=3 SV=1	RPOB_PEDPA	rpoB	Uniprot_Pediococcus_pentosaceus_strain_ATCC.fasta	134622	1	39	44	95	0.00207	0.399	VLGGDDQEVELR	K	D	0.997	97.8	25	97.8	1329.66	2403.5	671032	1141	1152
sample Treatment	2022 5:30:55 PM;File Size: 1000722054 [Byte] (F057606)	DNA-directed RNA polymerase subunit beta OS=Pediococcus pentosaceus (strain ATCC 25745 / CCUG 21536 / LMG 10740 / 183-1w) OX=278197 GN=rpoB PE=3 SV=1	RPOB_PEDPA	rpoB	Uniprot_Pediococcus_pentosaceus_strain_ATCC.fasta	134622	1	39	44	95	0.00207	0.399	VPHGGGGIVQDVK	R	I	0.992	44.1	25	44.1	1262.69	1968.5	846133	876	888
sample Treatment	2022 5:30:55 PM;File Size: 1000722054 [Byte] (F057606)	DNA-directed RNA polymerase subunit beta OS=Pediococcus pentosaceus (strain ATCC 25745 / CCUG 21536 / LMG 10740 / 183-1w) OX=278197 GN=rpoB PE=3 SV=1	RPOB_PEDPA	rpoB	Uniprot_Pediococcus_pentosaceus_strain_ATCC.fasta	134622	1	39	44	95	0.00207	0.399	YDMAPVGR	R	Y	0.98	36.5	25	36.5	908.429	1999	69092	270	277
sample Treatment	2022 5:30:55 PM;File Size: 1000722054 [Byte] (F057606)	DNA-directed RNA polymerase subunit beta OS=Pediococcus pentosaceus (strain ATCC 25745 / CCUG 21536 / LMG 10740 / 183-1w) OX=278197 GN=rpoB PE=3 SV=1	RPOB_PEDPA	rpoB	Uniprot_Pediococcus_pentosaceus_strain_ATCC.fasta	134622	1	39	44	95	0.00207	0.399	YGFIETPYR	R	R	0.971	34.2	25	34.2	1145.56	2861.5	620125	545	553
sample Treatment	2022 5:30:55 PM;File Size: 1000722054 [Byte] (F057606)	DNA-directed RNA polymerase subunit beta OS=Pediococcus pentosaceus (strain ATCC 25745 / CCUG 21536 / LMG 10740 / 183-1w) OX=278197 GN=rpoB PE=3 SV=1	RPOB_PEDPA	rpoB	Uniprot_Pediococcus_pentosaceus_strain_ATCC.fasta	134622	1	39	44	95	0.00207	0.399	YTVDEAR	K	E	0.9	33.3	25	33.3	853.405	1548.5	320858	76	82
sample Treatment	2022 5:30:55 PM;File Size: 1000722054 [Byte] (F057606)	GTPase HflX OS=Pediococcus pentosaceus (strain ATCC 25745 / CCUG 21536 / LMG 10740 / 183-1w) OX=278197 GN=hflX PE=3 SV=1	Q03H31_PEDPA	hflX	Uniprot_Pediococcus_pentosaceus_strain_ATCC.fasta	47456.4	0.998	1	1	2	4.35e-05	0.0381	LDQQTAGNTGGGFTNR	R	G	0.997	75	25	75	1636.77	1859.5	71700.9	138	153
sample Treatment	2022 5:30:55 PM;File Size: 1000722054 [Byte] (F057606)	Predicted dehydrogenase related protein OS=Pediococcus pentosaceus (strain ATCC 25745 / CCUG 21536 / LMG 10740 / 183-1w) OX=278197 GN=PEPE_0589 PE=4 SV=1	Q03GJ5_PEDPA	PEPE_0589	Uniprot_Pediococcus_pentosaceus_strain_ATCC.fasta	37696.8	1	5	5	8	0.000174	0.17	HLHEPNFQAIQK	R	Q	0.995	49.1	25	49.1	1461.76	2271.5	243272	124	135
sample Treatment	2022 5:30:55 PM;File Size: 1000722054 [Byte] (F057606)	Predicted dehydrogenase related protein OS=Pediococcus pentosaceus (strain ATCC 25745 / CCUG 21536 / LMG 10740 / 183-1w) OX=278197 GN=PEPE_0589 PE=4 SV=1	Q03GJ5_PEDPA	PEPE_0589	Uniprot_Pediococcus_pentosaceus_strain_ATCC.fasta	37696.8	1	5	5	8	0.000174	0.17	IYFTNEKEED	K	-	0.942	30.6	25	30.6	1287.57	2171	57740.1	326	335
sample Treatment	2022 5:30:55 PM;File Size: 1000722054 [Byte] (F057606)	Predicted dehydrogenase related protein OS=Pediococcus pentosaceus (strain ATCC 25745 / CCUG 21536 / LMG 10740 / 183-1w) OX=278197 GN=PEPE_0589 PE=4 SV=1	Q03GJ5_PEDPA	PEPE_0589	Uniprot_Pediococcus_pentosaceus_strain_ATCC.fasta	37696.8	1	5	5	8	0.000174	0.17	NVNSELASEIYGVK	K	D	0.997	68.7	25	63.4	1522.77	3088	218275	232	245
sample Treatment	2022 5:30:55 PM;File Size: 1000722054 [Byte] (F057606)	Predicted dehydrogenase related protein OS=Pediococcus pentosaceus (strain ATCC 25745 / CCUG 21536 / LMG 10740 / 183-1w) OX=278197 GN=PEPE_0589 PE=4 SV=1	Q03GJ5_PEDPA	PEPE_0589	Uniprot_Pediococcus_pentosaceus_strain_ATCC.fasta	37696.8	1	5	5	8	0.000174	0.17	VINDPENEK	R	N	0.985	38.6	25	38.6	1057.52	1464	75930.7	290	298
sample Treatment	2022 5:30:55 PM;File Size: 1000722054 [Byte] (F057606)	Predicted dehydrogenase related protein OS=Pediococcus pentosaceus (strain ATCC 25745 / CCUG 21536 / LMG 10740 / 183-1w) OX=278197 GN=PEPE_0589 PE=4 SV=1	Q03GJ5_PEDPA	PEPE_0589	Uniprot_Pediococcus_pentosaceus_strain_ATCC.fasta	37696.8	1	5	5	8	0.000174	0.17	YPEFDVTLNIGK	R	N	0.99	41.3	25	41.3	1395.72	3454	103161	220	231
sample Treatment	2022 5:30:55 PM;File Size: 1000722054 [Byte] (F057606)	Neutral endopeptidase OS=Pediococcus pentosaceus (strain ATCC 25745 / CCUG 21536 / LMG 10740 / 183-1w) OX=278197 GN=PEPE_0302 PE=3 SV=1	Q03HC3_PEDPA	PEPE_0302	Uniprot_Pediococcus_pentosaceus_strain_ATCC.fasta	71970.4	1	27	33	68	0.00148	0.394	ALSGQQESMPQEK	R	S	0.997	69	25	69	1432.67	1570.5	331053	301	313
sample Treatment	2022 5:30:55 PM;File Size: 1000722054 [Byte] (F057606)	Neutral endopeptidase OS=Pediococcus pentosaceus (strain ATCC 25745 / CCUG 21536 / LMG 10740 / 183-1w) OX=278197 GN=PEPE_0302 PE=3 SV=1	Q03HC3_PEDPA	PEPE_0302	Uniprot_Pediococcus_pentosaceus_strain_ATCC.fasta	71970.4	1	27	33	68	0.00148	0.394	DEDGVKPLLPYLK	R	Q	0.983	37.7	25	37.7	1486.82	3245	77911.3	80	92
sample Treatment	2022 5:30:55 PM;File Size: 1000722054 [Byte] (F057606)	Neutral endopeptidase OS=Pediococcus pentosaceus (strain ATCC 25745 / CCUG 21536 / LMG 10740 / 183-1w) OX=278197 GN=PEPE_0302 PE=3 SV=1	Q03HC3_PEDPA	PEPE_0302	Uniprot_Pediococcus_pentosaceus_strain_ATCC.fasta	71970.4	1	27	33	68	0.00148	0.394	EELLLAIDVHAPAK	R	L	0.996	50.8	25	50.8	1518.85	3318.5	111796	588	601
sample Treatment	2022 5:30:55 PM;File Size: 1000722054 [Byte] (F057606)	Neutral endopeptidase OS=Pediococcus pentosaceus (strain ATCC 25745 / CCUG 21536 / LMG 10740 / 183-1w) OX=278197 GN=PEPE_0302 PE=3 SV=1	Q03HC3_PEDPA	PEPE_0302	Uniprot_Pediococcus_pentosaceus_strain_ATCC.fasta	71970.4	1	27	33	68	0.00148	0.394	EFDGIPFAGGK	K	V	0.997	51.5	25	51.5	1137.56	3057.5	231652	526	536
sample Treatment	2022 5:30:55 PM;File Size: 1000722054 [Byte] (F057606)	Neutral endopeptidase OS=Pediococcus pentosaceus (strain ATCC 25745 / CCUG 21536 / LMG 10740 / 183-1w) OX=278197 GN=PEPE_0302 PE=3 SV=1	Q03HC3_PEDPA	PEPE_0302	Uniprot_Pediococcus_pentosaceus_strain_ATCC.fasta	71970.4	1	27	33	68	0.00148	0.394	FDASIAPFR	R	K	0.995	47.4	25	47.4	1023.53	2951.5	467600	195	203
sample Treatment	2022 5:30:55 PM;File Size: 1000722054 [Byte] (F057606)	Neutral endopeptidase OS=Pediococcus pentosaceus (strain ATCC 25745 / CCUG 21536 / LMG 10740 / 183-1w) OX=278197 GN=PEPE_0302 PE=3 SV=1	Q03HC3_PEDPA	PEPE_0302	Uniprot_Pediococcus_pentosaceus_strain_ATCC.fasta	71970.4	1	27	33	68	0.00148	0.394	FYEIAADFK	K	K	0.997	57.1	25	57.1	1103.54	3081.5	342442	69	77
sample Treatment	2022 5:30:55 PM;File Size: 1000722054 [Byte] (F057606)	Neutral endopeptidase OS=Pediococcus pentosaceus (strain ATCC 25745 / CCUG 21536 / LMG 10740 / 183-1w) OX=278197 GN=PEPE_0302 PE=3 SV=1	Q03HC3_PEDPA	PEPE_0302	Uniprot_Pediococcus_pentosaceus_strain_ATCC.fasta	71970.4	1	27	33	68	0.00148	0.394	FYEIAADFKK	K	R	0.979	36.6	25	36.6	1231.64	2756.5	131025	69	78
sample Treatment	2022 5:30:55 PM;File Size: 1000722054 [Byte] (F057606)	Neutral endopeptidase OS=Pediococcus pentosaceus (strain ATCC 25745 / CCUG 21536 / LMG 10740 / 183-1w) OX=278197 GN=PEPE_0302 PE=3 SV=1	Q03HC3_PEDPA	PEPE_0302	Uniprot_Pediococcus_pentosaceus_strain_ATCC.fasta	71970.4	1	27	33	68	0.00148	0.394	FYENLHQIVNADTFEDYKK	K	W	0.997	60.8	25	60.8	2374.14	3173	826487	255	273
sample Treatment	2022 5:30:55 PM;File Size: 1000722054 [Byte] (F057606)	Neutral endopeptidase OS=Pediococcus pentosaceus (strain ATCC 25745 / CCUG 21536 / LMG 10740 / 183-1w) OX=278197 GN=PEPE_0302 PE=3 SV=1	Q03HC3_PEDPA	PEPE_0302	Uniprot_Pediococcus_pentosaceus_strain_ATCC.fasta	71970.4	1	27	33	68	0.00148	0.394	HFHQLSEAMVK	K	E	0.984	38.4	25	38.4	1326.66	2140	129929	515	525
sample Treatment	2022 5:30:55 PM;File Size: 1000722054 [Byte] (F057606)	Neutral endopeptidase OS=Pediococcus pentosaceus (strain ATCC 25745 / CCUG 21536 / LMG 10740 / 183-1w) OX=278197 GN=PEPE_0302 PE=3 SV=1	Q03HC3_PEDPA	PEPE_0302	Uniprot_Pediococcus_pentosaceus_strain_ATCC.fasta	71970.4	1	27	33	68	0.00148	0.394	IFLEDQLAK	R	Y	0.996	48.8	25	39.8	1076.6	2901.5	921303	418	426
sample Treatment	2022 5:30:55 PM;File Size: 1000722054 [Byte] (F057606)	Neutral endopeptidase OS=Pediococcus pentosaceus (strain ATCC 25745 / CCUG 21536 / LMG 10740 / 183-1w) OX=278197 GN=PEPE_0302 PE=3 SV=1	Q03HC3_PEDPA	PEPE_0302	Uniprot_Pediococcus_pentosaceus_strain_ATCC.fasta	71970.4	1	27	33	68	0.00148	0.394	ILVGYPDELK	K	A	0.978	35.8	25	35.8	1146.64	2904	619724	382	391
sample Treatment	2022 5:30:55 PM;File Size: 1000722054 [Byte] (F057606)	Neutral endopeptidase OS=Pediococcus pentosaceus (strain ATCC 25745 / CCUG 21536 / LMG 10740 / 183-1w) OX=278197 GN=PEPE_0302 PE=3 SV=1	Q03HC3_PEDPA	PEPE_0302	Uniprot_Pediococcus_pentosaceus_strain_ATCC.fasta	71970.4	1	27	33	68	0.00148	0.394	KLVQALIGTVPEK	K	L	0.997	59.3	25	59.3	1395.86	2813.5	346513	235	247
sample Treatment	2022 5:30:55 PM;File Size: 1000722054 [Byte] (F057606)	Neutral endopeptidase OS=Pediococcus pentosaceus (strain ATCC 25745 / CCUG 21536 / LMG 10740 / 183-1w) OX=278197 GN=PEPE_0302 PE=3 SV=1	Q03HC3_PEDPA	PEPE_0302	Uniprot_Pediococcus_pentosaceus_strain_ATCC.fasta	71970.4	1	27	33	68	0.00148	0.394	LAENTWLGDATR	R	S	0.997	86.7	25	86.7	1346.67	2859	826038	359	370
sample Treatment	2022 5:30:55 PM;File Size: 1000722054 [Byte] (F057606)	Neutral endopeptidase OS=Pediococcus pentosaceus (strain ATCC 25745 / CCUG 21536 / LMG 10740 / 183-1w) OX=278197 GN=PEPE_0302 PE=3 SV=1	Q03HC3_PEDPA	PEPE_0302	Uniprot_Pediococcus_pentosaceus_strain_ATCC.fasta	71970.4	1	27	33	68	0.00148	0.394	LIITEPK	K	F	0.9	34.5	25	34.5	813.508	2259	628167	248	254
sample Treatment	2022 5:30:55 PM;File Size: 1000722054 [Byte] (F057606)	Neutral endopeptidase OS=Pediococcus pentosaceus (strain ATCC 25745 / CCUG 21536 / LMG 10740 / 183-1w) OX=278197 GN=PEPE_0302 PE=3 SV=1	Q03HC3_PEDPA	PEPE_0302	Uniprot_Pediococcus_pentosaceus_strain_ATCC.fasta	71970.4	1	27	33	68	0.00148	0.394	LVQALIGTVPEK	K	L	0.997	65.1	25	65.1	1267.76	2851	167619	236	247
sample Treatment	2022 5:30:55 PM;File Size: 1000722054 [Byte] (F057606)	Neutral endopeptidase OS=Pediococcus pentosaceus (strain ATCC 25745 / CCUG 21536 / LMG 10740 / 183-1w) OX=278197 GN=PEPE_0302 PE=3 SV=1	Q03HC3_PEDPA	PEPE_0302	Uniprot_Pediococcus_pentosaceus_strain_ATCC.fasta	71970.4	1	27	33	68	0.00148	0.394	LVVTENVADDGGLK	K	A	0.997	76.5	25	76.5	1429.75	2590.5	376707	541	554
sample Treatment	2022 5:30:55 PM;File Size: 1000722054 [Byte] (F057606)	Neutral endopeptidase OS=Pediococcus pentosaceus (strain ATCC 25745 / CCUG 21536 / LMG 10740 / 183-1w) OX=278197 GN=PEPE_0302 PE=3 SV=1	Q03HC3_PEDPA	PEPE_0302	Uniprot_Pediococcus_pentosaceus_strain_ATCC.fasta	71970.4	1	27	33	68	0.00148	0.394	NSEELSDVAK	K	L	0.997	66.2	25	66.2	1091.52	1874.5	313906	205	214
sample Treatment	2022 5:30:55 PM;File Size: 1000722054 [Byte] (F057606)	Neutral endopeptidase OS=Pediococcus pentosaceus (strain ATCC 25745 / CCUG 21536 / LMG 10740 / 183-1w) OX=278197 GN=PEPE_0302 PE=3 SV=1	Q03HC3_PEDPA	PEPE_0302	Uniprot_Pediococcus_pentosaceus_strain_ATCC.fasta	71970.4	1	27	33	68	0.00148	0.394	QREELLLAIDVHAPAK	K	L	0.997	59.8	25	59.8	1803.01	3112.5	440873	586	601
sample Treatment	2022 5:30:55 PM;File Size: 1000722054 [Byte] (F057606)	Neutral endopeptidase OS=Pediococcus pentosaceus (strain ATCC 25745 / CCUG 21536 / LMG 10740 / 183-1w) OX=278197 GN=PEPE_0302 PE=3 SV=1	Q03HC3_PEDPA	PEPE_0302	Uniprot_Pediococcus_pentosaceus_strain_ATCC.fasta	71970.4	1	27	33	68	0.00148	0.394	RDEDGVKPLLPYLK	K	Q	0.973	27.3	25	27.3	1642.92	3030	77778.6	79	92
sample Treatment	2022 5:30:55 PM;File Size: 1000722054 [Byte] (F057606)	Neutral endopeptidase OS=Pediococcus pentosaceus (strain ATCC 25745 / CCUG 21536 / LMG 10740 / 183-1w) OX=278197 GN=PEPE_0302 PE=3 SV=1	Q03HC3_PEDPA	PEPE_0302	Uniprot_Pediococcus_pentosaceus_strain_ATCC.fasta	71970.4	1	27	33	68	0.00148	0.394	RFDASIAPFR	K	K	0.997	55	25	55	1179.63	2773	311306	194	203
sample Treatment	2022 5:30:55 PM;File Size: 1000722054 [Byte] (F057606)	Neutral endopeptidase OS=Pediococcus pentosaceus (strain ATCC 25745 / CCUG 21536 / LMG 10740 / 183-1w) OX=278197 GN=PEPE_0302 PE=3 SV=1	Q03HC3_PEDPA	PEPE_0302	Uniprot_Pediococcus_pentosaceus_strain_ATCC.fasta	71970.4	1	27	33	68	0.00148	0.394	RTFSQVVGEYYGHK	R	Y	0.961	32.9	25	32.9	1670.83	2675.5	324844	321	334
sample Treatment	2022 5:30:55 PM;File Size: 1000722054 [Byte] (F057606)	Neutral endopeptidase OS=Pediococcus pentosaceus (strain ATCC 25745 / CCUG 21536 / LMG 10740 / 183-1w) OX=278197 GN=PEPE_0302 PE=3 SV=1	Q03HC3_PEDPA	PEPE_0302	Uniprot_Pediococcus_pentosaceus_strain_ATCC.fasta	71970.4	1	27	33	68	0.00148	0.394	SAFYLAR	K	R	0.9	39.2	25	39.2	827.441	2495	364211	314	320
sample Treatment	2022 5:30:55 PM;File Size: 1000722054 [Byte] (F057606)	Neutral endopeptidase OS=Pediococcus pentosaceus (strain ATCC 25745 / CCUG 21536 / LMG 10740 / 183-1w) OX=278197 GN=PEPE_0302 PE=3 SV=1	Q03HC3_PEDPA	PEPE_0302	Uniprot_Pediococcus_pentosaceus_strain_ATCC.fasta	71970.4	1	27	33	68	0.00148	0.394	SEDEAQAIIDGAK	K	R	0.997	78.2	25	78.2	1346.64	2668.5	345603	181	193
sample Treatment	2022 5:30:55 PM;File Size: 1000722054 [Byte] (F057606)	Neutral endopeptidase OS=Pediococcus pentosaceus (strain ATCC 25745 / CCUG 21536 / LMG 10740 / 183-1w) OX=278197 GN=PEPE_0302 PE=3 SV=1	Q03HC3_PEDPA	PEPE_0302	Uniprot_Pediococcus_pentosaceus_strain_ATCC.fasta	71970.4	1	27	33	68	0.00148	0.394	SLSGYLSEEFR	R	Q	0.997	68.4	25	68.4	1287.62	3323.5	512337	282	292
sample Treatment	2022 5:30:55 PM;File Size: 1000722054 [Byte] (F057606)	Neutral endopeptidase OS=Pediococcus pentosaceus (strain ATCC 25745 / CCUG 21536 / LMG 10740 / 183-1w) OX=278197 GN=PEPE_0302 PE=3 SV=1	Q03HC3_PEDPA	PEPE_0302	Uniprot_Pediococcus_pentosaceus_strain_ATCC.fasta	71970.4	1	27	33	68	0.00148	0.394	SWDDVNANLK	K	E	0.997	55.9	25	55.9	1161.55	2535	306300	99	108
sample Treatment	2022 5:30:55 PM;File Size: 1000722054 [Byte] (F057606)	Neutral endopeptidase OS=Pediococcus pentosaceus (strain ATCC 25745 / CCUG 21536 / LMG 10740 / 183-1w) OX=278197 GN=PEPE_0302 PE=3 SV=1	Q03HC3_PEDPA	PEPE_0302	Uniprot_Pediococcus_pentosaceus_strain_ATCC.fasta	71970.4	1	27	33	68	0.00148	0.394	TAAEGGSLVENVQEFSR	K	I	0.997	126	25	126	1793.87	3056.5	271585	401	417
sample Treatment	2022 5:30:55 PM;File Size: 1000722054 [Byte] (F057606)	Neutral endopeptidase OS=Pediococcus pentosaceus (strain ATCC 25745 / CCUG 21536 / LMG 10740 / 183-1w) OX=278197 GN=PEPE_0302 PE=3 SV=1	Q03HC3_PEDPA	PEPE_0302	Uniprot_Pediococcus_pentosaceus_strain_ATCC.fasta	71970.4	1	27	33	68	0.00148	0.394	TFSQVVGEYYGHK	R	Y	0.997	55.5	25	55.5	1514.73	2800	451173	322	334
sample Treatment	2022 5:30:55 PM;File Size: 1000722054 [Byte] (F057606)	3-oxoacyl-[acyl-carrier-protein] reductase OS=Pediococcus pentosaceus (strain ATCC 25745 / CCUG 21536 / LMG 10740 / 183-1w) OX=278197 GN=PEPE_0858 PE=4 SV=1	Q03FV5_PEDPA	PEPE_0858	Uniprot_Pediococcus_pentosaceus_strain_ATCC.fasta	26207	1	3	3	5	0.000109	0.178	AGIVGLTK	K	T	0.99	47.2	25	41.6	758.477	2234.5	91121.2	157	164
sample Treatment	2022 5:30:55 PM;File Size: 1000722054 [Byte] (F057606)	3-oxoacyl-[acyl-carrier-protein] reductase OS=Pediococcus pentosaceus (strain ATCC 25745 / CCUG 21536 / LMG 10740 / 183-1w) OX=278197 GN=PEPE_0858 PE=4 SV=1	Q03FV5_PEDPA	PEPE_0858	Uniprot_Pediococcus_pentosaceus_strain_ATCC.fasta	26207	1	3	3	5	0.000109	0.178	HDISDDAVK	R	E	0.997	60.4	25	60.4	999.474	1436	50798.1	38	46
sample Treatment	2022 5:30:55 PM;File Size: 1000722054 [Byte] (F057606)	3-oxoacyl-[acyl-carrier-protein] reductase OS=Pediococcus pentosaceus (strain ATCC 25745 / CCUG 21536 / LMG 10740 / 183-1w) OX=278197 GN=PEPE_0858 PE=4 SV=1	Q03FV5_PEDPA	PEPE_0858	Uniprot_Pediococcus_pentosaceus_strain_ATCC.fasta	26207	1	3	3	5	0.000109	0.178	SGNIVNISSISGTHGNVGQANYSASK	R	A	0.997	72.3	25	72.3	2562.25	2733	84637.3	131	156
sample Treatment	2022 5:30:55 PM;File Size: 1000722054 [Byte] (F057606)	Cystathionine beta-lyase family protein OS=Pediococcus pentosaceus (strain ATCC 25745 / CCUG 21536 / LMG 10740 / 183-1w) OX=278197 GN=PEPE_0737 PE=4 SV=1	Q03G74_PEDPA	PEPE_0737	Uniprot_Pediococcus_pentosaceus_strain_ATCC.fasta	46461.6	1	3	3	4	8.7e-05	0.0813	LIEMIANR	K	L	0.97	34.2	25	34.2	959.534	2530	60442	253	260
sample Treatment	2022 5:30:55 PM;File Size: 1000722054 [Byte] (F057606)	Cystathionine beta-lyase family protein OS=Pediococcus pentosaceus (strain ATCC 25745 / CCUG 21536 / LMG 10740 / 183-1w) OX=278197 GN=PEPE_0737 PE=4 SV=1	Q03G74_PEDPA	PEPE_0737	Uniprot_Pediococcus_pentosaceus_strain_ATCC.fasta	46461.6	1	3	3	4	8.7e-05	0.0813	SSFTVDEIK	R	V	0.986	38.9	25	38.9	1025.52	2512.5	154144	182	190
sample Treatment	2022 5:30:55 PM;File Size: 1000722054 [Byte] (F057606)	Cystathionine beta-lyase family protein OS=Pediococcus pentosaceus (strain ATCC 25745 / CCUG 21536 / LMG 10740 / 183-1w) OX=278197 GN=PEPE_0737 PE=4 SV=1	Q03G74_PEDPA	PEPE_0737	Uniprot_Pediococcus_pentosaceus_strain_ATCC.fasta	46461.6	1	3	3	4	8.7e-05	0.0813	TDLIQTINFGEPDSMIR	R	F	0.984	37.9	25	37.9	1949.96	3797	30931.4	321	337
sample Treatment	2022 5:30:55 PM;File Size: 1000722054 [Byte] (F057606)	Mannose-6-phosphate isomerase OS=Pediococcus pentosaceus (strain ATCC 25745 / CCUG 21536 / LMG 10740 / 183-1w) OX=278197 GN=PEPE_1334 PE=3 SV=1	Q03EJ7_PEDPA	PEPE_1334	Uniprot_Pediococcus_pentosaceus_strain_ATCC.fasta	36173.8	1	9	9	11	0.000239	0.435	AGEFYYVPSGTIHALGK	K	G	0.971	34.5	25	34.5	1809.92	3134	416248	159	175
sample Treatment	2022 5:30:55 PM;File Size: 1000722054 [Byte] (F057606)	Mannose-6-phosphate isomerase OS=Pediococcus pentosaceus (strain ATCC 25745 / CCUG 21536 / LMG 10740 / 183-1w) OX=278197 GN=PEPE_1334 PE=3 SV=1	Q03EJ7_PEDPA	PEPE_1334	Uniprot_Pediococcus_pentosaceus_strain_ATCC.fasta	36173.8	1	9	9	11	0.000239	0.435	ELHLQQSIDVTNVPHEDPK	R	L	0.997	40.3	25	40.3	2199.1	2698	119616	207	225
sample Treatment	2022 5:30:55 PM;File Size: 1000722054 [Byte] (F057606)	Mannose-6-phosphate isomerase OS=Pediococcus pentosaceus (strain ATCC 25745 / CCUG 21536 / LMG 10740 / 183-1w) OX=278197 GN=PEPE_1334 PE=3 SV=1	Q03EJ7_PEDPA	PEPE_1334	Uniprot_Pediococcus_pentosaceus_strain_ATCC.fasta	36173.8	1	9	9	11	0.000239	0.435	GEVFPLLTK	K	I	0.933	29.9	25	29.9	1003.58	3293	49014.3	76	84
sample Treatment	2022 5:30:55 PM;File Size: 1000722054 [Byte] (F057606)	Mannose-6-phosphate isomerase OS=Pediococcus pentosaceus (strain ATCC 25745 / CCUG 21536 / LMG 10740 / 183-1w) OX=278197 GN=PEPE_1334 PE=3 SV=1	Q03EJ7_PEDPA	PEPE_1334	Uniprot_Pediococcus_pentosaceus_strain_ATCC.fasta	36173.8	1	9	9	11	0.000239	0.435	GIMVLETQQSSDTTYR	K	L	0.995	47	25	47	1828.87	2815	19566.8	176	191
sample Treatment	2022 5:30:55 PM;File Size: 1000722054 [Byte] (F057606)	Mannose-6-phosphate isomerase OS=Pediococcus pentosaceus (strain ATCC 25745 / CCUG 21536 / LMG 10740 / 183-1w) OX=278197 GN=PEPE_1334 PE=3 SV=1	Q03EJ7_PEDPA	PEPE_1334	Uniprot_Pediococcus_pentosaceus_strain_ATCC.fasta	36173.8	1	9	9	11	0.000239	0.435	GQHFVLPNPVK	K	E	0.958	32.4	25	23	1235.69	2708	66661.8	294	304
sample Treatment	2022 5:30:55 PM;File Size: 1000722054 [Byte] (F057606)	Mannose-6-phosphate isomerase OS=Pediococcus pentosaceus (strain ATCC 25745 / CCUG 21536 / LMG 10740 / 183-1w) OX=278197 GN=PEPE_1334 PE=3 SV=1	Q03EJ7_PEDPA	PEPE_1334	Uniprot_Pediococcus_pentosaceus_strain_ATCC.fasta	36173.8	1	9	9	11	0.000239	0.435	ILDANDDLSVQVHPDDAYAAEHEHELGK	K	T	0.997	49	25	49	3101.45	2776	71325.8	85	112
sample Treatment	2022 5:30:55 PM;File Size: 1000722054 [Byte] (F057606)	Mannose-6-phosphate isomerase OS=Pediococcus pentosaceus (strain ATCC 25745 / CCUG 21536 / LMG 10740 / 183-1w) OX=278197 GN=PEPE_1334 PE=3 SV=1	Q03EJ7_PEDPA	PEPE_1334	Uniprot_Pediococcus_pentosaceus_strain_ATCC.fasta	36173.8	1	9	9	11	0.000239	0.435	SEPLFLNPVFHEK	M	I	0.995	49.1	25	49.1	1556.81	3353	166075	2	14
sample Treatment	2022 5:30:55 PM;File Size: 1000722054 [Byte] (F057606)	Mannose-6-phosphate isomerase OS=Pediococcus pentosaceus (strain ATCC 25745 / CCUG 21536 / LMG 10740 / 183-1w) OX=278197 GN=PEPE_1334 PE=3 SV=1	Q03EJ7_PEDPA	PEPE_1334	Uniprot_Pediococcus_pentosaceus_strain_ATCC.fasta	36173.8	1	9	9	11	0.000239	0.435	THEELADWINNGQWDK	K	L	0.897	28.2	25	28.2	1955.89	3326	82573.4	135	150
sample Treatment	2022 5:30:55 PM;File Size: 1000722054 [Byte] (F057606)	Mannose-6-phosphate isomerase OS=Pediococcus pentosaceus (strain ATCC 25745 / CCUG 21536 / LMG 10740 / 183-1w) OX=278197 GN=PEPE_1334 PE=3 SV=1	Q03EJ7_PEDPA	PEPE_1334	Uniprot_Pediococcus_pentosaceus_strain_ATCC.fasta	36173.8	1	9	9	11	0.000239	0.435	VGDAEVTTFVK	K	A	0.997	69.4	25	69.4	1165.61	2573	105050	233	243
sample Treatment	2022 5:30:55 PM;File Size: 1000722054 [Byte] (F057606)	Formate--tetrahydrofolate ligase OS=Pediococcus pentosaceus (strain ATCC 25745 / CCUG 21536 / LMG 10740 / 183-1w) OX=278197 GN=fhs PE=3 SV=1	FTHS_PEDPA	fhs	Uniprot_Pediococcus_pentosaceus_strain_ATCC.fasta	59601.7	1	4	4	7	0.000152	0.0976	DLHVGGAIATLLK	K	D	0.99	41.8	25	41.8	1307.77	3548	76181.5	234	246
sample Treatment	2022 5:30:55 PM;File Size: 1000722054 [Byte] (F057606)	Formate--tetrahydrofolate ligase OS=Pediococcus pentosaceus (strain ATCC 25745 / CCUG 21536 / LMG 10740 / 183-1w) OX=278197 GN=fhs PE=3 SV=1	FTHS_PEDPA	fhs	Uniprot_Pediococcus_pentosaceus_strain_ATCC.fasta	59601.7	1	4	4	7	0.000152	0.0976	IYGGSDVEYSPQALK	K	K	0.997	60.2	25	60.2	1626.8	2610.5	86077.1	452	466
sample Treatment	2022 5:30:55 PM;File Size: 1000722054 [Byte] (F057606)	Formate--tetrahydrofolate ligase OS=Pediococcus pentosaceus (strain ATCC 25745 / CCUG 21536 / LMG 10740 / 183-1w) OX=278197 GN=fhs PE=3 SV=1	FTHS_PEDPA	fhs	Uniprot_Pediococcus_pentosaceus_strain_ATCC.fasta	59601.7	1	4	4	7	0.000152	0.0976	LVLVTSINPTPAGEGK	K	S	0.997	65.3	25	65.3	1595.9	2977	210385	53	68
sample Treatment	2022 5:30:55 PM;File Size: 1000722054 [Byte] (F057606)	Formate--tetrahydrofolate ligase OS=Pediococcus pentosaceus (strain ATCC 25745 / CCUG 21536 / LMG 10740 / 183-1w) OX=278197 GN=fhs PE=3 SV=1	FTHS_PEDPA	fhs	Uniprot_Pediococcus_pentosaceus_strain_ATCC.fasta	59601.7	1	4	4	7	0.000152	0.0976	SQYSFSDDPK	K	Q	0.985	38.5	25	38.5	1173.51	2041	46594.1	486	495
sample Treatment	2022 5:30:55 PM;File Size: 1000722054 [Byte] (F057606)	30S ribosomal protein S6 OS=Pediococcus pentosaceus (strain ATCC 25745 / CCUG 21536 / LMG 10740 / 183-1w) OX=278197 GN=rpsF PE=3 SV=1	Q03I54_PEDPA	rpsF	Uniprot_Pediococcus_pentosaceus_strain_ATCC.fasta	10686.8	1	3	3	5	0.000109	0.404	ASDDEALNEFDR	K	L	0.997	82.2	25	82.2	1381.59	2549.5	212226	67	78
sample Treatment	2022 5:30:55 PM;File Size: 1000722054 [Byte] (F057606)	30S ribosomal protein S6 OS=Pediococcus pentosaceus (strain ATCC 25745 / CCUG 21536 / LMG 10740 / 183-1w) OX=278197 GN=rpsF PE=3 SV=1	Q03I54_PEDPA	rpsF	Uniprot_Pediococcus_pentosaceus_strain_ATCC.fasta	10686.8	1	3	3	5	0.000109	0.404	IADGILR	K	H	0.9	33.3	25	21.9	757.457	2290	61259.6	82	88
sample Treatment	2022 5:30:55 PM;File Size: 1000722054 [Byte] (F057606)	30S ribosomal protein S6 OS=Pediococcus pentosaceus (strain ATCC 25745 / CCUG 21536 / LMG 10740 / 183-1w) OX=278197 GN=rpsF PE=3 SV=1	Q03I54_PEDPA	rpsF	Uniprot_Pediococcus_pentosaceus_strain_ATCC.fasta	10686.8	1	3	3	5	0.000109	0.404	LAYEIGGFNDGIYHIVNVK	R	A	0.997	75.7	25	75.7	2122.1	3603	134426	48	66
sample Treatment	2022 5:30:55 PM;File Size: 1000722054 [Byte] (F057606)	Cell elongation-specific peptidoglycan D,D-transpeptidase OS=Pediococcus pentosaceus (strain ATCC 25745 / CCUG 21536 / LMG 10740 / 183-1w) OX=278197 GN=PEPE_0727 PE=3 SV=1	Q03G84_PEDPA	PEPE_0727	Uniprot_Pediococcus_pentosaceus_strain_ATCC.fasta	74449.7	1	24	26	44	0.000957	0.435	ELSEIGEHLSEMPGVK	K	I	0.957	32.1	25	32.1	1754.86	3004	23507.8	199	214
sample Treatment	2022 5:30:55 PM;File Size: 1000722054 [Byte] (F057606)	Cell elongation-specific peptidoglycan D,D-transpeptidase OS=Pediococcus pentosaceus (strain ATCC 25745 / CCUG 21536 / LMG 10740 / 183-1w) OX=278197 GN=PEPE_0727 PE=3 SV=1	Q03G84_PEDPA	PEPE_0727	Uniprot_Pediococcus_pentosaceus_strain_ATCC.fasta	74449.7	1	24	26	44	0.000957	0.435	FQEEVQK	K	I	0.9	35.9	25	27.9	907.452	1548	122204	315	321
sample Treatment	2022 5:30:55 PM;File Size: 1000722054 [Byte] (F057606)	Cell elongation-specific peptidoglycan D,D-transpeptidase OS=Pediococcus pentosaceus (strain ATCC 25745 / CCUG 21536 / LMG 10740 / 183-1w) OX=278197 GN=PEPE_0727 PE=3 SV=1	Q03G84_PEDPA	PEPE_0727	Uniprot_Pediococcus_pentosaceus_strain_ATCC.fasta	74449.7	1	24	26	44	0.000957	0.435	GPTGSANIGK	K	A	0.994	44.9	25	44.9	901.474	1353	107274	499	508
sample Treatment	2022 5:30:55 PM;File Size: 1000722054 [Byte] (F057606)	Cell elongation-specific peptidoglycan D,D-transpeptidase OS=Pediococcus pentosaceus (strain ATCC 25745 / CCUG 21536 / LMG 10740 / 183-1w) OX=278197 GN=PEPE_0727 PE=3 SV=1	Q03G84_PEDPA	PEPE_0727	Uniprot_Pediococcus_pentosaceus_strain_ATCC.fasta	74449.7	1	24	26	44	0.000957	0.435	GVIYDSTGK	R	V	0.984	38	25	33	939.478	1749	133944	66	74
sample Treatment	2022 5:30:55 PM;File Size: 1000722054 [Byte] (F057606)	Cell elongation-specific peptidoglycan D,D-transpeptidase OS=Pediococcus pentosaceus (strain ATCC 25745 / CCUG 21536 / LMG 10740 / 183-1w) OX=278197 GN=PEPE_0727 PE=3 SV=1	Q03G84_PEDPA	PEPE_0727	Uniprot_Pediococcus_pentosaceus_strain_ATCC.fasta	74449.7	1	24	26	44	0.000957	0.435	GYFEQFGLGTK	R	T	0.989	40.7	25	40.7	1246.61	3194.5	346119	475	485
sample Treatment	2022 5:30:55 PM;File Size: 1000722054 [Byte] (F057606)	Cell elongation-specific peptidoglycan D,D-transpeptidase OS=Pediococcus pentosaceus (strain ATCC 25745 / CCUG 21536 / LMG 10740 / 183-1w) OX=278197 GN=PEPE_0727 PE=3 SV=1	Q03G84_PEDPA	PEPE_0727	Uniprot_Pediococcus_pentosaceus_strain_ATCC.fasta	74449.7	1	24	26	44	0.000957	0.435	IYAAYWK	K	Y	0.9	33.1	25	33.1	914.477	2633	296082	664	670
sample Treatment	2022 5:30:55 PM;File Size: 1000722054 [Byte] (F057606)	Cell elongation-specific peptidoglycan D,D-transpeptidase OS=Pediococcus pentosaceus (strain ATCC 25745 / CCUG 21536 / LMG 10740 / 183-1w) OX=278197 GN=PEPE_0727 PE=3 SV=1	Q03G84_PEDPA	PEPE_0727	Uniprot_Pediococcus_pentosaceus_strain_ATCC.fasta	74449.7	1	24	26	44	0.000957	0.435	KGDNLVLTINSK	K	F	0.983	37.9	25	37.9	1301.74	2530	137550	303	314
sample Treatment	2022 5:30:55 PM;File Size: 1000722054 [Byte] (F057606)	Cell elongation-specific peptidoglycan D,D-transpeptidase OS=Pediococcus pentosaceus (strain ATCC 25745 / CCUG 21536 / LMG 10740 / 183-1w) OX=278197 GN=PEPE_0727 PE=3 SV=1	Q03G84_PEDPA	PEPE_0727	Uniprot_Pediococcus_pentosaceus_strain_ATCC.fasta	74449.7	1	24	26	44	0.000957	0.435	KLVTDGLYDVVHGSNK	R	Y	0.994	45.9	25	45.9	1744.92	2837	133223	579	594
sample Treatment	2022 5:30:55 PM;File Size: 1000722054 [Byte] (F057606)	Cell elongation-specific peptidoglycan D,D-transpeptidase OS=Pediococcus pentosaceus (strain ATCC 25745 / CCUG 21536 / LMG 10740 / 183-1w) OX=278197 GN=PEPE_0727 PE=3 SV=1	Q03G84_PEDPA	PEPE_0727	Uniprot_Pediococcus_pentosaceus_strain_ATCC.fasta	74449.7	1	24	26	44	0.000957	0.435	LVTDGLYDVVHGSNK	K	Y	0.997	63.8	25	63.8	1616.83	2959.5	215296	580	594
sample Treatment	2022 5:30:55 PM;File Size: 1000722054 [Byte] (F057606)	Cell elongation-specific peptidoglycan D,D-transpeptidase OS=Pediococcus pentosaceus (strain ATCC 25745 / CCUG 21536 / LMG 10740 / 183-1w) OX=278197 GN=PEPE_0727 PE=3 SV=1	Q03G84_PEDPA	PEPE_0727	Uniprot_Pediococcus_pentosaceus_strain_ATCC.fasta	74449.7	1	24	26	44	0.000957	0.435	MTDNVLGTINEPIVMGSVVK	K	G	0.99	41.3	25	33	2117.1	3712	56893.6	364	383
sample Treatment	2022 5:30:55 PM;File Size: 1000722054 [Byte] (F057606)	Cell elongation-specific peptidoglycan D,D-transpeptidase OS=Pediococcus pentosaceus (strain ATCC 25745 / CCUG 21536 / LMG 10740 / 183-1w) OX=278197 GN=PEPE_0727 PE=3 SV=1	Q03G84_PEDPA	PEPE_0727	Uniprot_Pediococcus_pentosaceus_strain_ATCC.fasta	74449.7	1	24	26	44	0.000957	0.435	NAGGQSTGGYAVVMNPK	K	T	0.997	90.3	25	90.3	1650.79	2342	57159.7	329	345
sample Treatment	2022 5:30:55 PM;File Size: 1000722054 [Byte] (F057606)	Cell elongation-specific peptidoglycan D,D-transpeptidase OS=Pediococcus pentosaceus (strain ATCC 25745 / CCUG 21536 / LMG 10740 / 183-1w) OX=278197 GN=PEPE_0727 PE=3 SV=1	Q03G84_PEDPA	PEPE_0727	Uniprot_Pediococcus_pentosaceus_strain_ATCC.fasta	74449.7	1	24	26	44	0.000957	0.435	NDSVGQSYLEK	R	Q	0.969	34	25	34	1239.59	2069	99969.5	259	269
sample Treatment	2022 5:30:55 PM;File Size: 1000722054 [Byte] (F057606)	Cell elongation-specific peptidoglycan D,D-transpeptidase OS=Pediococcus pentosaceus (strain ATCC 25745 / CCUG 21536 / LMG 10740 / 183-1w) OX=278197 GN=PEPE_0727 PE=3 SV=1	Q03G84_PEDPA	PEPE_0727	Uniprot_Pediococcus_pentosaceus_strain_ATCC.fasta	74449.7	1	24	26	44	0.000957	0.435	SQTAIQVSSGGQIVK	K	K	0.997	51.9	25	51.9	1502.82	2339	60563.6	280	294
sample Treatment	2022 5:30:55 PM;File Size: 1000722054 [Byte] (F057606)	Cell elongation-specific peptidoglycan D,D-transpeptidase OS=Pediococcus pentosaceus (strain ATCC 25745 / CCUG 21536 / LMG 10740 / 183-1w) OX=278197 GN=PEPE_0727 PE=3 SV=1	Q03G84_PEDPA	PEPE_0727	Uniprot_Pediococcus_pentosaceus_strain_ATCC.fasta	74449.7	1	24	26	44	0.000957	0.435	TDIANYLLADSK	R	N	0.997	77.8	25	77.8	1323.68	3271	191786	119	130
sample Treatment	2022 5:30:55 PM;File Size: 1000722054 [Byte] (F057606)	Cell elongation-specific peptidoglycan D,D-transpeptidase OS=Pediococcus pentosaceus (strain ATCC 25745 / CCUG 21536 / LMG 10740 / 183-1w) OX=278197 GN=PEPE_0727 PE=3 SV=1	Q03G84_PEDPA	PEPE_0727	Uniprot_Pediococcus_pentosaceus_strain_ATCC.fasta	74449.7	1	24	26	44	0.000957	0.435	TDNTVETNNVQR	R	G	0.992	42.5	25	42.5	1390.66	1466	22398.8	54	65
sample Treatment	2022 5:30:55 PM;File Size: 1000722054 [Byte] (F057606)	Cell elongation-specific peptidoglycan D,D-transpeptidase OS=Pediococcus pentosaceus (strain ATCC 25745 / CCUG 21536 / LMG 10740 / 183-1w) OX=278197 GN=PEPE_0727 PE=3 SV=1	Q03G84_PEDPA	PEPE_0727	Uniprot_Pediococcus_pentosaceus_strain_ATCC.fasta	74449.7	1	24	26	44	0.000957	0.435	TGAVIALAGADR	K	N	0.997	71.6	25	70.7	1114.62	2511.5	218529	346	357
sample Treatment	2022 5:30:55 PM;File Size: 1000722054 [Byte] (F057606)	Cell elongation-specific peptidoglycan D,D-transpeptidase OS=Pediococcus pentosaceus (strain ATCC 25745 / CCUG 21536 / LMG 10740 / 183-1w) OX=278197 GN=PEPE_0727 PE=3 SV=1	Q03G84_PEDPA	PEPE_0727	Uniprot_Pediococcus_pentosaceus_strain_ATCC.fasta	74449.7	1	24	26	44	0.000957	0.435	TGGPLAGISPGISAK	K	T	0.997	81.5	25	81.5	1325.74	2840.5	280635	597	611
sample Treatment	2022 5:30:55 PM;File Size: 1000722054 [Byte] (F057606)	Cell elongation-specific peptidoglycan D,D-transpeptidase OS=Pediococcus pentosaceus (strain ATCC 25745 / CCUG 21536 / LMG 10740 / 183-1w) OX=278197 GN=PEPE_0727 PE=3 SV=1	Q03G84_PEDPA	PEPE_0727	Uniprot_Pediococcus_pentosaceus_strain_ATCC.fasta	74449.7	1	24	26	44	0.000957	0.435	TGIDLPGESSGFK	K	G	0.979	36.2	25	36.2	1307.65	2847	315023	486	498
sample Treatment	2022 5:30:55 PM;File Size: 1000722054 [Byte] (F057606)	Cell elongation-specific peptidoglycan D,D-transpeptidase OS=Pediococcus pentosaceus (strain ATCC 25745 / CCUG 21536 / LMG 10740 / 183-1w) OX=278197 GN=PEPE_0727 PE=3 SV=1	Q03G84_PEDPA	PEPE_0727	Uniprot_Pediococcus_pentosaceus_strain_ATCC.fasta	74449.7	1	24	26	44	0.000957	0.435	TGLPSDEVNTLLAEGYAR	K	N	0.997	87.5	25	87.5	1905.96	3485.5	175008	241	258
sample Treatment	2022 5:30:55 PM;File Size: 1000722054 [Byte] (F057606)	Cell elongation-specific peptidoglycan D,D-transpeptidase OS=Pediococcus pentosaceus (strain ATCC 25745 / CCUG 21536 / LMG 10740 / 183-1w) OX=278197 GN=PEPE_0727 PE=3 SV=1	Q03G84_PEDPA	PEPE_0727	Uniprot_Pediococcus_pentosaceus_strain_ATCC.fasta	74449.7	1	24	26	44	0.000957	0.435	TVSPTVLNQVDMTSAQR	K	K	0.997	88.4	25	88.4	1846.93	2830	92735.2	562	578
sample Treatment	2022 5:30:55 PM;File Size: 1000722054 [Byte] (F057606)	Cell elongation-specific peptidoglycan D,D-transpeptidase OS=Pediococcus pentosaceus (strain ATCC 25745 / CCUG 21536 / LMG 10740 / 183-1w) OX=278197 GN=PEPE_0727 PE=3 SV=1	Q03G84_PEDPA	PEPE_0727	Uniprot_Pediococcus_pentosaceus_strain_ATCC.fasta	74449.7	1	24	26	44	0.000957	0.435	VAPHVVEQIR	R	S	0.99	41	25	41	1147.66	2004	134904	539	548
sample Treatment	2022 5:30:55 PM;File Size: 1000722054 [Byte] (F057606)	Cell elongation-specific peptidoglycan D,D-transpeptidase OS=Pediococcus pentosaceus (strain ATCC 25745 / CCUG 21536 / LMG 10740 / 183-1w) OX=278197 GN=PEPE_0727 PE=3 SV=1	Q03G84_PEDPA	PEPE_0727	Uniprot_Pediococcus_pentosaceus_strain_ATCC.fasta	74449.7	1	24	26	44	0.000957	0.435	VLVGNTAHQAISYTK	K	G	0.997	50.1	25	50.1	1601.86	2278.5	443293	75	89
sample Treatment	2022 5:30:55 PM;File Size: 1000722054 [Byte] (F057606)	Cell elongation-specific peptidoglycan D,D-transpeptidase OS=Pediococcus pentosaceus (strain ATCC 25745 / CCUG 21536 / LMG 10740 / 183-1w) OX=278197 GN=PEPE_0727 PE=3 SV=1	Q03G84_PEDPA	PEPE_0727	Uniprot_Pediococcus_pentosaceus_strain_ATCC.fasta	74449.7	1	24	26	44	0.000957	0.435	YLEANDTELSR	K	T	0.997	58.8	25	47.1	1310.62	2197	286967	108	118
sample Treatment	2022 5:30:55 PM;File Size: 1000722054 [Byte] (F057606)	Cell elongation-specific peptidoglycan D,D-transpeptidase OS=Pediococcus pentosaceus (strain ATCC 25745 / CCUG 21536 / LMG 10740 / 183-1w) OX=278197 GN=PEPE_0727 PE=3 SV=1	Q03G84_PEDPA	PEPE_0727	Uniprot_Pediococcus_pentosaceus_strain_ATCC.fasta	74449.7	1	24	26	44	0.000957	0.435	YSSGASLSGMNPNVFNK	K	L	0.996	49.5	25	49.5	1772.83	2937	34440.4	456	472
sample Treatment	2022 5:30:55 PM;File Size: 1000722054 [Byte] (F057606)	Phosphoglucosamine mutase OS=Pediococcus pentosaceus (strain ATCC 25745 / CCUG 21536 / LMG 10740 / 183-1w) OX=278197 GN=glmM PE=3 SV=1	GLMM_PEDPA	glmM	Uniprot_Pediococcus_pentosaceus_strain_ATCC.fasta	48780.6	1	9	10	18	0.000391	0.219	CIAVDELGNIVDGDK	R	I	0.997	101	25	101	1617.78	3406	265022	250	264
sample Treatment	2022 5:30:55 PM;File Size: 1000722054 [Byte] (F057606)	Phosphoglucosamine mutase OS=Pediococcus pentosaceus (strain ATCC 25745 / CCUG 21536 / LMG 10740 / 183-1w) OX=278197 GN=glmM PE=3 SV=1	GLMM_PEDPA	glmM	Uniprot_Pediococcus_pentosaceus_strain_ATCC.fasta	48780.6	1	9	10	18	0.000391	0.219	EAVGQYVDR	K	I	0.997	50.6	25	50.6	1036.51	1904.5	335459	432	440
sample Treatment	2022 5:30:55 PM;File Size: 1000722054 [Byte] (F057606)	Phosphoglucosamine mutase OS=Pediococcus pentosaceus (strain ATCC 25745 / CCUG 21536 / LMG 10740 / 183-1w) OX=278197 GN=glmM PE=3 SV=1	GLMM_PEDPA	glmM	Uniprot_Pediococcus_pentosaceus_strain_ATCC.fasta	48780.6	1	9	10	18	0.000391	0.219	FFGSDGYK	K	L	0.99	44.3	25	44.3	920.415	2277	178493	115	122
sample Treatment	2022 5:30:55 PM;File Size: 1000722054 [Byte] (F057606)	Phosphoglucosamine mutase OS=Pediococcus pentosaceus (strain ATCC 25745 / CCUG 21536 / LMG 10740 / 183-1w) OX=278197 GN=glmM PE=3 SV=1	GLMM_PEDPA	glmM	Uniprot_Pediococcus_pentosaceus_strain_ATCC.fasta	48780.6	1	9	10	18	0.000391	0.219	GADMGVAFDGDGDR	K	C	0.997	72	25	72	1382.56	2439	146717	236	249
sample Treatment	2022 5:30:55 PM;File Size: 1000722054 [Byte] (F057606)	Phosphoglucosamine mutase OS=Pediococcus pentosaceus (strain ATCC 25745 / CCUG 21536 / LMG 10740 / 183-1w) OX=278197 GN=glmM PE=3 SV=1	GLMM_PEDPA	glmM	Uniprot_Pediococcus_pentosaceus_strain_ATCC.fasta	48780.6	1	9	10	18	0.000391	0.219	GIANETLTPELAFQLGR	R	A	0.997	94.6	25	94.6	1829.98	3691.5	367291	13	29
sample Treatment	2022 5:30:55 PM;File Size: 1000722054 [Byte] (F057606)	Phosphoglucosamine mutase OS=Pediococcus pentosaceus (strain ATCC 25745 / CCUG 21536 / LMG 10740 / 183-1w) OX=278197 GN=glmM PE=3 SV=1	GLMM_PEDPA	glmM	Uniprot_Pediococcus_pentosaceus_strain_ATCC.fasta	48780.6	1	9	10	18	0.000391	0.219	KLSELAADVTTYPQK	K	L	0.98	36.8	25	36.8	1663.89	2672	56844.2	362	376
sample Treatment	2022 5:30:55 PM;File Size: 1000722054 [Byte] (F057606)	Phosphoglucosamine mutase OS=Pediococcus pentosaceus (strain ATCC 25745 / CCUG 21536 / LMG 10740 / 183-1w) OX=278197 GN=glmM PE=3 SV=1	GLMM_PEDPA	glmM	Uniprot_Pediococcus_pentosaceus_strain_ATCC.fasta	48780.6	1	9	10	18	0.000391	0.219	LSELAADVTTYPQK	K	L	0.997	83.6	25	83.6	1535.8	2654	98203.3	363	376
sample Treatment	2022 5:30:55 PM;File Size: 1000722054 [Byte] (F057606)	Phosphoglucosamine mutase OS=Pediococcus pentosaceus (strain ATCC 25745 / CCUG 21536 / LMG 10740 / 183-1w) OX=278197 GN=glmM PE=3 SV=1	GLMM_PEDPA	glmM	Uniprot_Pediococcus_pentosaceus_strain_ATCC.fasta	48780.6	1	9	10	18	0.000391	0.219	VLVRPSGTEDLLR	R	I	0.959	32.5	25	32.5	1454.83	2673	167234	411	423
sample Treatment	2022 5:30:55 PM;File Size: 1000722054 [Byte] (F057606)	Phosphoglucosamine mutase OS=Pediococcus pentosaceus (strain ATCC 25745 / CCUG 21536 / LMG 10740 / 183-1w) OX=278197 GN=glmM PE=3 SV=1	GLMM_PEDPA	glmM	Uniprot_Pediococcus_pentosaceus_strain_ATCC.fasta	48780.6	1	9	10	18	0.000391	0.219	YVVEEMLK	R	D	0.99	43.8	25	43.8	1010.52	2822.5	162469	314	321
sample Treatment	2022 5:30:55 PM;File Size: 1000722054 [Byte] (F057606)	Phosphocarrier protein HPr OS=Pediococcus pentosaceus (strain ATCC 25745 / CCUG 21536 / LMG 10740 / 183-1w) OX=278197 GN=PEPE_0609 PE=3 SV=1	Q03GH6_PEDPA	PEPE_0609	Uniprot_Pediococcus_pentosaceus_strain_ATCC.fasta	9368.8	1	2	2	6	0.00013	0.136	FNSDIQLTYK	K	D	0.997	66.1	25	66.1	1228.62	2724.5	2858100	29	38
sample Treatment	2022 5:30:55 PM;File Size: 1000722054 [Byte] (F057606)	Phosphocarrier protein HPr OS=Pediococcus pentosaceus (strain ATCC 25745 / CCUG 21536 / LMG 10740 / 183-1w) OX=278197 GN=PEPE_0609 PE=3 SV=1	Q03GH6_PEDPA	PEPE_0609	Uniprot_Pediococcus_pentosaceus_strain_ATCC.fasta	9368.8	1	2	2	6	0.00013	0.136	FNSDIQLTYKDK	K	S	0.997	62.5	25	59.7	1471.74	2478	104722	29	40
sample Treatment	2022 5:30:55 PM;File Size: 1000722054 [Byte] (F057606)	Uncharacterized protein OS=Pediococcus pentosaceus (strain ATCC 25745 / CCUG 21536 / LMG 10740 / 183-1w) OX=278197 GN=PEPE_1125 PE=4 SV=1	Q03F42_PEDPA	PEPE_1125	Uniprot_Pediococcus_pentosaceus_strain_ATCC.fasta	10429.8	1	6	9	22	0.000478	0.69	AIINYTHTWTGR	R	I	0.992	44.1	25	44.1	1432.73	2668	443449	21	32
sample Treatment	2022 5:30:55 PM;File Size: 1000722054 [Byte] (F057606)	Uncharacterized protein OS=Pediococcus pentosaceus (strain ATCC 25745 / CCUG 21536 / LMG 10740 / 183-1w) OX=278197 GN=PEPE_1125 PE=4 SV=1	Q03F42_PEDPA	PEPE_1125	Uniprot_Pediococcus_pentosaceus_strain_ATCC.fasta	10429.8	1	6	9	22	0.000478	0.69	ESDLLAYLK	R	K	0.997	61.3	25	52.3	1051.57	3439.5	327505	54	62
sample Treatment	2022 5:30:55 PM;File Size: 1000722054 [Byte] (F057606)	Uncharacterized protein OS=Pediococcus pentosaceus (strain ATCC 25745 / CCUG 21536 / LMG 10740 / 183-1w) OX=278197 GN=PEPE_1125 PE=4 SV=1	Q03F42_PEDPA	PEPE_1125	Uniprot_Pediococcus_pentosaceus_strain_ATCC.fasta	10429.8	1	6	9	22	0.000478	0.69	FGKDELNNR	K	A	0.994	45.9	25	45.9	1092.54	1670	457744	12	20
sample Treatment	2022 5:30:55 PM;File Size: 1000722054 [Byte] (F057606)	Uncharacterized protein OS=Pediococcus pentosaceus (strain ATCC 25745 / CCUG 21536 / LMG 10740 / 183-1w) OX=278197 GN=PEPE_1125 PE=4 SV=1	Q03F42_PEDPA	PEPE_1125	Uniprot_Pediococcus_pentosaceus_strain_ATCC.fasta	10429.8	1	6	9	22	0.000478	0.69	HLTETDGVTNITR	K	R	0.997	82.7	25	82.7	1456.74	2099	712588	64	76
sample Treatment	2022 5:30:55 PM;File Size: 1000722054 [Byte] (F057606)	Uncharacterized protein OS=Pediococcus pentosaceus (strain ATCC 25745 / CCUG 21536 / LMG 10740 / 183-1w) OX=278197 GN=PEPE_1125 PE=4 SV=1	Q03F42_PEDPA	PEPE_1125	Uniprot_Pediococcus_pentosaceus_strain_ATCC.fasta	10429.8	1	6	9	22	0.000478	0.69	ITEIDLR	K	L	0.9	44.2	25	44.2	859.489	2410	349377	35	41
sample Treatment	2022 5:30:55 PM;File Size: 1000722054 [Byte] (F057606)	Uncharacterized protein OS=Pediococcus pentosaceus (strain ATCC 25745 / CCUG 21536 / LMG 10740 / 183-1w) OX=278197 GN=PEPE_1125 PE=4 SV=1	Q03F42_PEDPA	PEPE_1125	Uniprot_Pediococcus_pentosaceus_strain_ATCC.fasta	10429.8	1	6	9	22	0.000478	0.69	MTPGSVYVFK	M	F	0.937	30.2	25	30.2	1128.58	2845	86047.7	2	11
sample Treatment	2022 5:30:55 PM;File Size: 1000722054 [Byte] (F057606)	Oligoendopeptidase F OS=Pediococcus pentosaceus (strain ATCC 25745 / CCUG 21536 / LMG 10740 / 183-1w) OX=278197 GN=PEPE_1633 PE=3 SV=1	Q03DR8_PEDPA	PEPE_1633	Uniprot_Pediococcus_pentosaceus_strain_ATCC.fasta	68301.2	1	8	9	15	0.000326	0.174	AYLGLDHMYQFDR	K	H	0.924	29.5	25	29.5	1628.75	3191.5	154851	293	305
sample Treatment	2022 5:30:55 PM;File Size: 1000722054 [Byte] (F057606)	Oligoendopeptidase F OS=Pediococcus pentosaceus (strain ATCC 25745 / CCUG 21536 / LMG 10740 / 183-1w) OX=278197 GN=PEPE_1633 PE=3 SV=1	Q03DR8_PEDPA	PEPE_1633	Uniprot_Pediococcus_pentosaceus_strain_ATCC.fasta	68301.2	1	8	9	15	0.000326	0.174	DYQNYLQEEFEQR	K	W	0.997	52	25	52	1761.77	3255.5	81200.9	336	348
sample Treatment	2022 5:30:55 PM;File Size: 1000722054 [Byte] (F057606)	Oligoendopeptidase F OS=Pediococcus pentosaceus (strain ATCC 25745 / CCUG 21536 / LMG 10740 / 183-1w) OX=278197 GN=PEPE_1633 PE=3 SV=1	Q03DR8_PEDPA	PEPE_1633	Uniprot_Pediococcus_pentosaceus_strain_ATCC.fasta	68301.2	1	8	9	15	0.000326	0.174	FLSAGASNYPVEIVK	K	Q	0.997	114	25	114	1594.85	3074	194918	555	569
sample Treatment	2022 5:30:55 PM;File Size: 1000722054 [Byte] (F057606)	Oligoendopeptidase F OS=Pediococcus pentosaceus (strain ATCC 25745 / CCUG 21536 / LMG 10740 / 183-1w) OX=278197 GN=PEPE_1633 PE=3 SV=1	Q03DR8_PEDPA	PEPE_1633	Uniprot_Pediococcus_pentosaceus_strain_ATCC.fasta	68301.2	1	8	9	15	0.000326	0.174	HVPLVADAK	R	L	0.982	37	25	37	949.547	1819	62974.9	306	314
sample Treatment	2022 5:30:55 PM;File Size: 1000722054 [Byte] (F057606)	Oligoendopeptidase F OS=Pediococcus pentosaceus (strain ATCC 25745 / CCUG 21536 / LMG 10740 / 183-1w) OX=278197 GN=PEPE_1633 PE=3 SV=1	Q03DR8_PEDPA	PEPE_1633	Uniprot_Pediococcus_pentosaceus_strain_ATCC.fasta	68301.2	1	8	9	15	0.000326	0.174	IQEQAAHTLTPAEEK	R	L	0.997	59.9	25	59.9	1665.84	1859	269484	144	158
sample Treatment	2022 5:30:55 PM;File Size: 1000722054 [Byte] (F057606)	Oligoendopeptidase F OS=Pediococcus pentosaceus (strain ATCC 25745 / CCUG 21536 / LMG 10740 / 183-1w) OX=278197 GN=PEPE_1633 PE=3 SV=1	Q03DR8_PEDPA	PEPE_1633	Uniprot_Pediococcus_pentosaceus_strain_ATCC.fasta	68301.2	1	8	9	15	0.000326	0.174	LLAQLQPAIDDASDISSK	K	L	0.997	54	25	54	1884.99	3272.5	156949	159	176
sample Treatment	2022 5:30:55 PM;File Size: 1000722054 [Byte] (F057606)	Oligoendopeptidase F OS=Pediococcus pentosaceus (strain ATCC 25745 / CCUG 21536 / LMG 10740 / 183-1w) OX=278197 GN=PEPE_1633 PE=3 SV=1	Q03DR8_PEDPA	PEPE_1633	Uniprot_Pediococcus_pentosaceus_strain_ATCC.fasta	68301.2	1	8	9	15	0.000326	0.174	LSLAFEEGKK	K	V	0.944	30.9	25	30.9	1121.62	2504	39457.1	315	324
sample Treatment	2022 5:30:55 PM;File Size: 1000722054 [Byte] (F057606)	Oligoendopeptidase F OS=Pediococcus pentosaceus (strain ATCC 25745 / CCUG 21536 / LMG 10740 / 183-1w) OX=278197 GN=PEPE_1633 PE=3 SV=1	Q03DR8_PEDPA	PEPE_1633	Uniprot_Pediococcus_pentosaceus_strain_ATCC.fasta	68301.2	1	8	9	15	0.000326	0.174	WEAAVSFYDPK	K	I	0.997	52.3	25	52.3	1312.62	3086	173926	105	115
sample Treatment	2022 5:30:55 PM;File Size: 1000722054 [Byte] (F057606)	UvrABC system protein B OS=Pediococcus pentosaceus (strain ATCC 25745 / CCUG 21536 / LMG 10740 / 183-1w) OX=278197 GN=uvrB PE=3 SV=1	Q03GX8_PEDPA	uvrB	Uniprot_Pediococcus_pentosaceus_strain_ATCC.fasta	76550.4	1	7	7	8	0.000174	0.141	DSSINDEIDELR	K	H	0.997	60.5	25	60.5	1405.64	2933	51420.2	117	128
sample Treatment	2022 5:30:55 PM;File Size: 1000722054 [Byte] (F057606)	UvrABC system protein B OS=Pediococcus pentosaceus (strain ATCC 25745 / CCUG 21536 / LMG 10740 / 183-1w) OX=278197 GN=uvrB PE=3 SV=1	Q03GX8_PEDPA	uvrB	Uniprot_Pediococcus_pentosaceus_strain_ATCC.fasta	76550.4	1	7	7	8	0.000174	0.141	SLISSTSDTEDK	R	G	0.978	36	25	36	1282.6	1940	52139.8	599	610
sample Treatment	2022 5:30:55 PM;File Size: 1000722054 [Byte] (F057606)	UvrABC system protein B OS=Pediococcus pentosaceus (strain ATCC 25745 / CCUG 21536 / LMG 10740 / 183-1w) OX=278197 GN=uvrB PE=3 SV=1	Q03GX8_PEDPA	uvrB	Uniprot_Pediococcus_pentosaceus_strain_ATCC.fasta	76550.4	1	7	7	8	0.000174	0.141	SMQETIDETAR	K	R	0.997	52.9	25	52.9	1280.58	2157	91243.4	564	574
sample Treatment	2022 5:30:55 PM;File Size: 1000722054 [Byte] (F057606)	UvrABC system protein B OS=Pediococcus pentosaceus (strain ATCC 25745 / CCUG 21536 / LMG 10740 / 183-1w) OX=278197 GN=uvrB PE=3 SV=1	Q03GX8_PEDPA	uvrB	Uniprot_Pediococcus_pentosaceus_strain_ATCC.fasta	76550.4	1	7	7	8	0.000174	0.141	TFTISNVIQK	K	V	0.921	29.1	25	29.1	1150.65	2998	117790	51	60
sample Treatment	2022 5:30:55 PM;File Size: 1000722054 [Byte] (F057606)	UvrABC system protein B OS=Pediococcus pentosaceus (strain ATCC 25745 / CCUG 21536 / LMG 10740 / 183-1w) OX=278197 GN=uvrB PE=3 SV=1	Q03GX8_PEDPA	uvrB	Uniprot_Pediococcus_pentosaceus_strain_ATCC.fasta	76550.4	1	7	7	8	0.000174	0.141	TLAGQLYGEFK	K	Q	0.997	51	25	51	1226.64	3233	89356.7	73	83
sample Treatment	2022 5:30:55 PM;File Size: 1000722054 [Byte] (F057606)	UvrABC system protein B OS=Pediococcus pentosaceus (strain ATCC 25745 / CCUG 21536 / LMG 10740 / 183-1w) OX=278197 GN=uvrB PE=3 SV=1	Q03GX8_PEDPA	uvrB	Uniprot_Pediococcus_pentosaceus_strain_ATCC.fasta	76550.4	1	7	7	8	0.000174	0.141	VHGDVVEIFPAANDAHSIR	R	V	0.899	22.9	25	22.7	2047.04	2899	89736.2	200	218
sample Treatment	2022 5:30:55 PM;File Size: 1000722054 [Byte] (F057606)	UvrABC system protein B OS=Pediococcus pentosaceus (strain ATCC 25745 / CCUG 21536 / LMG 10740 / 183-1w) OX=278197 GN=uvrB PE=3 SV=1	Q03GX8_PEDPA	uvrB	Uniprot_Pediococcus_pentosaceus_strain_ATCC.fasta	76550.4	1	7	7	8	0.000174	0.141	YQPTGDQPTAINELVDGIK	K	S	0.997	74	25	74	2059.03	3530	21367	16	34
sample Treatment	2022 5:30:55 PM;File Size: 1000722054 [Byte] (F057606)	Dipeptidase OS=Pediococcus pentosaceus (strain ATCC 25745 / CCUG 21536 / LMG 10740 / 183-1w) OX=278197 GN=PEPE_1455 PE=3 SV=1	Q03E86_PEDPA	PEPE_1455	Uniprot_Pediococcus_pentosaceus_strain_ATCC.fasta	52979.5	1	10	10	22	0.000478	0.28	DASIDGSTIISR	K	N	0.997	54.2	25	54.2	1234.63	2416.5	157204	17	28
sample Treatment	2022 5:30:55 PM;File Size: 1000722054 [Byte] (F057606)	Dipeptidase OS=Pediococcus pentosaceus (strain ATCC 25745 / CCUG 21536 / LMG 10740 / 183-1w) OX=278197 GN=PEPE_1455 PE=3 SV=1	Q03E86_PEDPA	PEPE_1455	Uniprot_Pediococcus_pentosaceus_strain_ATCC.fasta	52979.5	1	10	10	22	0.000478	0.28	DLIDEYHLNPDFDGYNFR	K	H	0.988	40.2	25	40.2	2243	3673.5	256610	213	230
sample Treatment	2022 5:30:55 PM;File Size: 1000722054 [Byte] (F057606)	Dipeptidase OS=Pediococcus pentosaceus (strain ATCC 25745 / CCUG 21536 / LMG 10740 / 183-1w) OX=278197 GN=PEPE_1455 PE=3 SV=1	Q03E86_PEDPA	PEPE_1455	Uniprot_Pediococcus_pentosaceus_strain_ATCC.fasta	52979.5	1	10	10	22	0.000478	0.28	FVVVNPEEQPR	R	D	0.993	43.7	25	43.7	1313.68	2481.5	587628	41	51
sample Treatment	2022 5:30:55 PM;File Size: 1000722054 [Byte] (F057606)	Dipeptidase OS=Pediococcus pentosaceus (strain ATCC 25745 / CCUG 21536 / LMG 10740 / 183-1w) OX=278197 GN=PEPE_1455 PE=3 SV=1	Q03E86_PEDPA	PEPE_1455	Uniprot_Pediococcus_pentosaceus_strain_ATCC.fasta	52979.5	1	10	10	22	0.000478	0.28	HIFGSASIK	R	D	0.994	45	25	45	959.531	2089.5	214593	231	239
sample Treatment	2022 5:30:55 PM;File Size: 1000722054 [Byte] (F057606)	Dipeptidase OS=Pediococcus pentosaceus (strain ATCC 25745 / CCUG 21536 / LMG 10740 / 183-1w) OX=278197 GN=PEPE_1455 PE=3 SV=1	Q03E86_PEDPA	PEPE_1455	Uniprot_Pediococcus_pentosaceus_strain_ATCC.fasta	52979.5	1	10	10	22	0.000478	0.28	HQTNPTQFLEQANEQLATESFTR	K	Q	0.997	90.5	25	89.8	2690.28	3620.5	237886	422	444
sample Treatment	2022 5:30:55 PM;File Size: 1000722054 [Byte] (F057606)	Dipeptidase OS=Pediococcus pentosaceus (strain ATCC 25745 / CCUG 21536 / LMG 10740 / 183-1w) OX=278197 GN=PEPE_1455 PE=3 SV=1	Q03E86_PEDPA	PEPE_1455	Uniprot_Pediococcus_pentosaceus_strain_ATCC.fasta	52979.5	1	10	10	22	0.000478	0.28	IPDDAYVVAPNR	R	M	0.997	60.2	25	60.2	1329.68	2416.5	422016	181	192
sample Treatment	2022 5:30:55 PM;File Size: 1000722054 [Byte] (F057606)	Dipeptidase OS=Pediococcus pentosaceus (strain ATCC 25745 / CCUG 21536 / LMG 10740 / 183-1w) OX=278197 GN=PEPE_1455 PE=3 SV=1	Q03E86_PEDPA	PEPE_1455	Uniprot_Pediococcus_pentosaceus_strain_ATCC.fasta	52979.5	1	10	10	22	0.000478	0.28	LLGDMVTLGSAHMK	K	L	0.997	64.2	25	64.2	1472.76	3069	90524.9	448	461
sample Treatment	2022 5:30:55 PM;File Size: 1000722054 [Byte] (F057606)	Dipeptidase OS=Pediococcus pentosaceus (strain ATCC 25745 / CCUG 21536 / LMG 10740 / 183-1w) OX=278197 GN=PEPE_1455 PE=3 SV=1	Q03E86_PEDPA	PEPE_1455	Uniprot_Pediococcus_pentosaceus_strain_ATCC.fasta	52979.5	1	10	10	22	0.000478	0.28	NHNVHILQIR	R	N	0.995	48.7	25	48.7	1243.7	2226	270985	318	327
sample Treatment	2022 5:30:55 PM;File Size: 1000722054 [Byte] (F057606)	Dipeptidase OS=Pediococcus pentosaceus (strain ATCC 25745 / CCUG 21536 / LMG 10740 / 183-1w) OX=278197 GN=PEPE_1455 PE=3 SV=1	Q03E86_PEDPA	PEPE_1455	Uniprot_Pediococcus_pentosaceus_strain_ATCC.fasta	52979.5	1	10	10	22	0.000478	0.28	NTFELETTGIYR	R	R	0.992	42.7	25	42.7	1443.71	3034.5	156829	399	410
sample Treatment	2022 5:30:55 PM;File Size: 1000722054 [Byte] (F057606)	Dipeptidase OS=Pediococcus pentosaceus (strain ATCC 25745 / CCUG 21536 / LMG 10740 / 183-1w) OX=278197 GN=PEPE_1455 PE=3 SV=1	Q03E86_PEDPA	PEPE_1455	Uniprot_Pediococcus_pentosaceus_strain_ATCC.fasta	52979.5	1	10	10	22	0.000478	0.28	TLFRPIGINR	K	N	0.914	28.9	25	28.9	1186.71	2736.5	148110	308	317
sample Treatment	2022 5:30:55 PM;File Size: 1000722054 [Byte] (F057606)	30S ribosomal protein S16 OS=Pediococcus pentosaceus (strain ATCC 25745 / CCUG 21536 / LMG 10740 / 183-1w) OX=278197 GN=rpsP PE=3 SV=1	RS16_PEDPA	rpsP	Uniprot_Pediococcus_pentosaceus_strain_ATCC.fasta	10316.3	0.999	2	3	8	0.000174	0.278	FIAQVGTYNPLTEPASVK	R	L	0.997	98.4	25	98.4	1935.02	3214.5	2394750	33	50
sample Treatment	2022 5:30:55 PM;File Size: 1000722054 [Byte] (F057606)	30S ribosomal protein S16 OS=Pediococcus pentosaceus (strain ATCC 25745 / CCUG 21536 / LMG 10740 / 183-1w) OX=278197 GN=rpsP PE=3 SV=1	RS16_PEDPA	rpsP	Uniprot_Pediococcus_pentosaceus_strain_ATCC.fasta	10316.3	0.999	2	3	8	0.000174	0.278	VVVADSR	R	S	0.9	45.7	25	45.7	745.42	1269.5	412998	20	26
sample Treatment	2022 5:30:55 PM;File Size: 1000722054 [Byte] (F057606)	Acetolactate synthase, large subunit OS=Pediococcus pentosaceus (strain ATCC 25745 / CCUG 21536 / LMG 10740 / 183-1w) OX=278197 GN=PEPE_0405 PE=3 SV=1	Q03H21_PEDPA	PEPE_0405	Uniprot_Pediococcus_pentosaceus_strain_ATCC.fasta	61265	1	4	4	8	0.000174	0.115	DYQVGVDGEQYLETLR	K	E	0.962	32.7	25	32.7	1884.9	3351	27569.6	337	352
sample Treatment	2022 5:30:55 PM;File Size: 1000722054 [Byte] (F057606)	Acetolactate synthase, large subunit OS=Pediococcus pentosaceus (strain ATCC 25745 / CCUG 21536 / LMG 10740 / 183-1w) OX=278197 GN=PEPE_0405 PE=3 SV=1	Q03H21_PEDPA	PEPE_0405	Uniprot_Pediococcus_pentosaceus_strain_ATCC.fasta	61265	1	4	4	8	0.000174	0.115	HSDLVITVGYDAIEYEPR	K	N	0.989	41.1	25	41.1	2077.02	3430	145220	273	290
sample Treatment	2022 5:30:55 PM;File Size: 1000722054 [Byte] (F057606)	Acetolactate synthase, large subunit OS=Pediococcus pentosaceus (strain ATCC 25745 / CCUG 21536 / LMG 10740 / 183-1w) OX=278197 GN=PEPE_0405 PE=3 SV=1	Q03H21_PEDPA	PEPE_0405	Uniprot_Pediococcus_pentosaceus_strain_ATCC.fasta	61265	1	4	4	8	0.000174	0.115	IHPLSIISALQYR	R	V	0.995	48.1	25	48.1	1510.87	3688.5	140793	371	383
sample Treatment	2022 5:30:55 PM;File Size: 1000722054 [Byte] (F057606)	Acetolactate synthase, large subunit OS=Pediococcus pentosaceus (strain ATCC 25745 / CCUG 21536 / LMG 10740 / 183-1w) OX=278197 GN=PEPE_0405 PE=3 SV=1	Q03H21_PEDPA	PEPE_0405	Uniprot_Pediococcus_pentosaceus_strain_ATCC.fasta	61265	1	4	4	8	0.000174	0.115	KPILGPASPIEIEELAK	K	A	0.996	50	25	50	1805.04	3403.5	243615	185	201
sample Treatment	2022 5:30:55 PM;File Size: 1000722054 [Byte] (F057606)	50S ribosomal protein L16 OS=Pediococcus pentosaceus (strain ATCC 25745 / CCUG 21536 / LMG 10740 / 183-1w) OX=278197 GN=rplP PE=3 SV=1	RL16_PEDPA	rplP	Uniprot_Pediococcus_pentosaceus_strain_ATCC.fasta	16031.6	1	4	7	20	0.000435	0.278	GTPEGWVAPVK	K	R	0.997	57.3	25	57.3	1140.6	2537	1933470	88	98
sample Treatment	2022 5:30:55 PM;File Size: 1000722054 [Byte] (F057606)	50S ribosomal protein L16 OS=Pediococcus pentosaceus (strain ATCC 25745 / CCUG 21536 / LMG 10740 / 183-1w) OX=278197 GN=rplP PE=3 SV=1	RL16_PEDPA	rplP	Uniprot_Pediococcus_pentosaceus_strain_ATCC.fasta	16031.6	1	4	7	20	0.000435	0.278	GTPEGWVAPVKR	K	E	0.997	60.6	25	60.6	1296.71	2269.5	649949	88	99
sample Treatment	2022 5:30:55 PM;File Size: 1000722054 [Byte] (F057606)	50S ribosomal protein L16 OS=Pediococcus pentosaceus (strain ATCC 25745 / CCUG 21536 / LMG 10740 / 183-1w) OX=278197 GN=rplP PE=3 SV=1	RL16_PEDPA	rplP	Uniprot_Pediococcus_pentosaceus_strain_ATCC.fasta	16031.6	1	4	7	20	0.000435	0.278	IIEREEVGGESDEG	K	-	0.997	71	25	71	1518.69	1824	786944	131	144
sample Treatment	2022 5:30:55 PM;File Size: 1000722054 [Byte] (F057606)	50S ribosomal protein L16 OS=Pediococcus pentosaceus (strain ATCC 25745 / CCUG 21536 / LMG 10740 / 183-1w) OX=278197 GN=rplP PE=3 SV=1	RL16_PEDPA	rplP	Uniprot_Pediococcus_pentosaceus_strain_ATCC.fasta	16031.6	1	4	7	20	0.000435	0.278	VMFEVAGVPEEVAR	K	E	0.997	72.3	25	70.6	1532.78	3228	2700330	102	115
sample Treatment	2022 5:30:55 PM;File Size: 1000722054 [Byte] (F057606)	NADPH:quinone reductase related Zn-dependent oxidoreductase OS=Pediococcus pentosaceus (strain ATCC 25745 / CCUG 21536 / LMG 10740 / 183-1w) OX=278197 GN=PEPE_0702 PE=4 SV=1	Q03GA9_PEDPA	PEPE_0702	Uniprot_Pediococcus_pentosaceus_strain_ATCC.fasta	33591.7	0.576	1	1	1	2.17e-05	0.026	LPAEISYR	K	T	0.963	32.9	25	32.9	948.515	2354	68140.5	110	117
sample Treatment	2022 5:30:55 PM;File Size: 1000722054 [Byte] (F057606)	Endoribonuclease YbeY OS=Pediococcus pentosaceus (strain ATCC 25745 / CCUG 21536 / LMG 10740 / 183-1w) OX=278197 GN=ybeY PE=3 SV=1	YBEY_PEDPA	ybeY	Uniprot_Pediococcus_pentosaceus_strain_ATCC.fasta	18155.9	0.879	1	1	1	2.17e-05	0.0577	EIMNAYGLK	K	-	0.993	43.7	25	43.7	1038.53	2550	46264.3	147	155
sample Treatment	2022 5:30:55 PM;File Size: 1000722054 [Byte] (F057606)	Esterase/lipase OS=Pediococcus pentosaceus (strain ATCC 25745 / CCUG 21536 / LMG 10740 / 183-1w) OX=278197 GN=PEPE_1440 PE=4 SV=1	Q03EA1_PEDPA	PEPE_1440	Uniprot_Pediococcus_pentosaceus_strain_ATCC.fasta	29445.5	1	2	2	3	6.52e-05	0.128	LESFGYQVSVLR	R	Y	0.997	68.1	25	68.1	1397.74	3245	106446	58	69
sample Treatment	2022 5:30:55 PM;File Size: 1000722054 [Byte] (F057606)	Esterase/lipase OS=Pediococcus pentosaceus (strain ATCC 25745 / CCUG 21536 / LMG 10740 / 183-1w) OX=278197 GN=PEPE_1440 PE=4 SV=1	Q03EA1_PEDPA	PEPE_1440	Uniprot_Pediococcus_pentosaceus_strain_ATCC.fasta	29445.5	1	2	2	3	6.52e-05	0.128	SPSLIFVPGGSYTHIDLAQAEK	K	V	0.997	73.7	25	72.9	2330.2	3551	93076.5	32	53
sample Treatment	2022 5:30:55 PM;File Size: 1000722054 [Byte] (F057606)	Predicted N6-adenine-specific DNA methylase OS=Pediococcus pentosaceus (strain ATCC 25745 / CCUG 21536 / LMG 10740 / 183-1w) OX=278197 GN=PEPE_0936 PE=4 SV=1	Q03FM9_PEDPA	PEPE_0936	Uniprot_Pediococcus_pentosaceus_strain_ATCC.fasta	42591	0.973	1	1	2	4.35e-05	0.0239	IVVGEFEAK	K	T	0.975	35.1	25	35.1	991.546	2557	110683	60	68
sample Treatment	2022 5:30:55 PM;File Size: 1000722054 [Byte] (F057606)	Ribonuclease J OS=Pediococcus pentosaceus (strain ATCC 25745 / CCUG 21536 / LMG 10740 / 183-1w) OX=278197 GN=rnj PE=3 SV=1	Q03F23_PEDPA	rnj	Uniprot_Pediococcus_pentosaceus_strain_ATCC.fasta	64979.4	1	9	9	17	0.00037	0.193	AFDNFHVVDDK	K	K	0.984	38.3	25	38.3	1306.61	2551	76884.4	127	137
sample Treatment	2022 5:30:55 PM;File Size: 1000722054 [Byte] (F057606)	Ribonuclease J OS=Pediococcus pentosaceus (strain ATCC 25745 / CCUG 21536 / LMG 10740 / 183-1w) OX=278197 GN=rnj PE=3 SV=1	Q03F23_PEDPA	rnj	Uniprot_Pediococcus_pentosaceus_strain_ATCC.fasta	64979.4	1	9	9	17	0.00037	0.193	AVQANLDNK	R	E	0.986	38.9	25	38.9	972.511	1521.5	147632	524	532
sample Treatment	2022 5:30:55 PM;File Size: 1000722054 [Byte] (F057606)	Ribonuclease J OS=Pediococcus pentosaceus (strain ATCC 25745 / CCUG 21536 / LMG 10740 / 183-1w) OX=278197 GN=rnj PE=3 SV=1	Q03F23_PEDPA	rnj	Uniprot_Pediococcus_pentosaceus_strain_ATCC.fasta	64979.4	1	9	9	17	0.00037	0.193	FDQTATDGYQTDFGR	K	L	0.997	75.6	25	70.1	1721.74	2494	91239.8	179	193
sample Treatment	2022 5:30:55 PM;File Size: 1000722054 [Byte] (F057606)	Ribonuclease J OS=Pediococcus pentosaceus (strain ATCC 25745 / CCUG 21536 / LMG 10740 / 183-1w) OX=278197 GN=rnj PE=3 SV=1	Q03F23_PEDPA	rnj	Uniprot_Pediococcus_pentosaceus_strain_ATCC.fasta	64979.4	1	9	9	17	0.00037	0.193	IVNTAIELNK	K	L	0.997	53.2	25	53.2	1114.65	2365.5	223004	275	284
sample Treatment	2022 5:30:55 PM;File Size: 1000722054 [Byte] (F057606)	Ribonuclease J OS=Pediococcus pentosaceus (strain ATCC 25745 / CCUG 21536 / LMG 10740 / 183-1w) OX=278197 GN=rnj PE=3 SV=1	Q03F23_PEDPA	rnj	Uniprot_Pediococcus_pentosaceus_strain_ATCC.fasta	64979.4	1	9	9	17	0.00037	0.193	KVVLTGHDLEK	K	I	0.995	48.3	25	48.3	1238.71	1885	49187.4	264	274
sample Treatment	2022 5:30:55 PM;File Size: 1000722054 [Byte] (F057606)	Ribonuclease J OS=Pediococcus pentosaceus (strain ATCC 25745 / CCUG 21536 / LMG 10740 / 183-1w) OX=278197 GN=rnj PE=3 SV=1	Q03F23_PEDPA	rnj	Uniprot_Pediococcus_pentosaceus_strain_ATCC.fasta	64979.4	1	9	9	17	0.00037	0.193	LKPEETIILETGK	K	L	0.997	58.1	25	58.1	1470.84	2683.5	218434	302	314
sample Treatment	2022 5:30:55 PM;File Size: 1000722054 [Byte] (F057606)	Ribonuclease J OS=Pediococcus pentosaceus (strain ATCC 25745 / CCUG 21536 / LMG 10740 / 183-1w) OX=278197 GN=rnj PE=3 SV=1	Q03F23_PEDPA	rnj	Uniprot_Pediococcus_pentosaceus_strain_ATCC.fasta	64979.4	1	9	9	17	0.00037	0.193	SSNETDIADVMAETIK	R	Y	0.986	39	25	39	1723.81	3543	41791.3	218	233
sample Treatment	2022 5:30:55 PM;File Size: 1000722054 [Byte] (F057606)	Ribonuclease J OS=Pediococcus pentosaceus (strain ATCC 25745 / CCUG 21536 / LMG 10740 / 183-1w) OX=278197 GN=rnj PE=3 SV=1	Q03F23_PEDPA	rnj	Uniprot_Pediococcus_pentosaceus_strain_ATCC.fasta	64979.4	1	9	9	17	0.00037	0.193	VIALLSDSANAENPER	K	S	0.997	73.2	25	73.2	1698.87	2894	148493	202	217
sample Treatment	2022 5:30:55 PM;File Size: 1000722054 [Byte] (F057606)	Ribonuclease J OS=Pediococcus pentosaceus (strain ATCC 25745 / CCUG 21536 / LMG 10740 / 183-1w) OX=278197 GN=rnj PE=3 SV=1	Q03F23_PEDPA	rnj	Uniprot_Pediococcus_pentosaceus_strain_ATCC.fasta	64979.4	1	9	9	17	0.00037	0.193	VIVASVASNILR	R	I	0.997	66.1	25	66.1	1241.76	3289.5	223525	239	250
sample Treatment	2022 5:30:55 PM;File Size: 1000722054 [Byte] (F057606)	ABC-type oligopeptide transport system, periplasmic component OS=Pediococcus pentosaceus (strain ATCC 25745 / CCUG 21536 / LMG 10740 / 183-1w) OX=278197 GN=PEPE_0396 PE=3 SV=1	Q03H30_PEDPA	PEPE_0396	Uniprot_Pediococcus_pentosaceus_strain_ATCC.fasta	60453.9	1	29	37	97	0.00211	0.537	AEQILLK	K	D	0.9	42.4	25	33.2	814.503	2260	823136	494	500
sample Treatment	2022 5:30:55 PM;File Size: 1000722054 [Byte] (F057606)	ABC-type oligopeptide transport system, periplasmic component OS=Pediococcus pentosaceus (strain ATCC 25745 / CCUG 21536 / LMG 10740 / 183-1w) OX=278197 GN=PEPE_0396 PE=3 SV=1	Q03H30_PEDPA	PEPE_0396	Uniprot_Pediococcus_pentosaceus_strain_ATCC.fasta	60453.9	1	29	37	97	0.00211	0.537	ALSLAINR	K	Q	0.99	48.8	25	46.6	857.52	2563.5	1215510	309	316
sample Treatment	2022 5:30:55 PM;File Size: 1000722054 [Byte] (F057606)	ABC-type oligopeptide transport system, periplasmic component OS=Pediococcus pentosaceus (strain ATCC 25745 / CCUG 21536 / LMG 10740 / 183-1w) OX=278197 GN=PEPE_0396 PE=3 SV=1	Q03H30_PEDPA	PEPE_0396	Uniprot_Pediococcus_pentosaceus_strain_ATCC.fasta	60453.9	1	29	37	97	0.00211	0.537	DFASEVDVK	K	S	0.988	39.7	25	31.9	1009.48	2462	225741	348	356
sample Treatment	2022 5:30:55 PM;File Size: 1000722054 [Byte] (F057606)	ABC-type oligopeptide transport system, periplasmic component OS=Pediococcus pentosaceus (strain ATCC 25745 / CCUG 21536 / LMG 10740 / 183-1w) OX=278197 GN=PEPE_0396 PE=3 SV=1	Q03H30_PEDPA	PEPE_0396	Uniprot_Pediococcus_pentosaceus_strain_ATCC.fasta	60453.9	1	29	37	97	0.00211	0.537	DFVYGWQR	K	T	0.968	33.8	25	33.8	1070.51	2865.5	1522980	112	119
sample Treatment	2022 5:30:55 PM;File Size: 1000722054 [Byte] (F057606)	ABC-type oligopeptide transport system, periplasmic component OS=Pediococcus pentosaceus (strain ATCC 25745 / CCUG 21536 / LMG 10740 / 183-1w) OX=278197 GN=PEPE_0396 PE=3 SV=1	Q03H30_PEDPA	PEPE_0396	Uniprot_Pediococcus_pentosaceus_strain_ATCC.fasta	60453.9	1	29	37	97	0.00211	0.537	DQAVAPLYQQGQSMLR	K	K	0.997	76.8	25	76.8	1804.9	3065	820235	501	516
sample Treatment	2022 5:30:55 PM;File Size: 1000722054 [Byte] (F057606)	ABC-type oligopeptide transport system, periplasmic component OS=Pediococcus pentosaceus (strain ATCC 25745 / CCUG 21536 / LMG 10740 / 183-1w) OX=278197 GN=PEPE_0396 PE=3 SV=1	Q03H30_PEDPA	PEPE_0396	Uniprot_Pediococcus_pentosaceus_strain_ATCC.fasta	60453.9	1	29	37	97	0.00211	0.537	EYDKLIEAANTTDAGNTEK	K	R	0.986	39.4	25	39.4	2082.98	2411.5	116442	468	486
sample Treatment	2022 5:30:55 PM;File Size: 1000722054 [Byte] (F057606)	ABC-type oligopeptide transport system, periplasmic component OS=Pediococcus pentosaceus (strain ATCC 25745 / CCUG 21536 / LMG 10740 / 183-1w) OX=278197 GN=PEPE_0396 PE=3 SV=1	Q03H30_PEDPA	PEPE_0396	Uniprot_Pediococcus_pentosaceus_strain_ATCC.fasta	60453.9	1	29	37	97	0.00211	0.537	GDGSTVATGVTPAK	K	L	0.997	92.5	25	76.7	1260.64	1702	364218	325	338
sample Treatment	2022 5:30:55 PM;File Size: 1000722054 [Byte] (F057606)	ABC-type oligopeptide transport system, periplasmic component OS=Pediococcus pentosaceus (strain ATCC 25745 / CCUG 21536 / LMG 10740 / 183-1w) OX=278197 GN=PEPE_0396 PE=3 SV=1	Q03H30_PEDPA	PEPE_0396	Uniprot_Pediococcus_pentosaceus_strain_ATCC.fasta	60453.9	1	29	37	97	0.00211	0.537	GIVYNSAGLNFDYK	K	Q	0.997	95.7	25	95.7	1560.77	3138	378986	522	535
sample Treatment	2022 5:30:55 PM;File Size: 1000722054 [Byte] (F057606)	ABC-type oligopeptide transport system, periplasmic component OS=Pediococcus pentosaceus (strain ATCC 25745 / CCUG 21536 / LMG 10740 / 183-1w) OX=278197 GN=PEPE_0396 PE=3 SV=1	Q03H30_PEDPA	PEPE_0396	Uniprot_Pediococcus_pentosaceus_strain_ATCC.fasta	60453.9	1	29	37	97	0.00211	0.537	KTANIQESAELATMDQSK	K	V	0.997	57.7	25	57.7	1964.96	2446.5	136120	32	49
sample Treatment	2022 5:30:55 PM;File Size: 1000722054 [Byte] (F057606)	ABC-type oligopeptide transport system, periplasmic component OS=Pediococcus pentosaceus (strain ATCC 25745 / CCUG 21536 / LMG 10740 / 183-1w) OX=278197 GN=PEPE_0396 PE=3 SV=1	Q03H30_PEDPA	PEPE_0396	Uniprot_Pediococcus_pentosaceus_strain_ATCC.fasta	60453.9	1	29	37	97	0.00211	0.537	LDQMTLSSEQVK	K	Q	0.997	61.2	25	61.2	1378.69	2377	650278	261	272
sample Treatment	2022 5:30:55 PM;File Size: 1000722054 [Byte] (F057606)	ABC-type oligopeptide transport system, periplasmic component OS=Pediococcus pentosaceus (strain ATCC 25745 / CCUG 21536 / LMG 10740 / 183-1w) OX=278197 GN=PEPE_0396 PE=3 SV=1	Q03H30_PEDPA	PEPE_0396	Uniprot_Pediococcus_pentosaceus_strain_ATCC.fasta	60453.9	1	29	37	97	0.00211	0.537	LIEAANTTDAGNTEK	K	R	0.997	93.3	25	84.7	1547.75	1799.5	844355	472	486
sample Treatment	2022 5:30:55 PM;File Size: 1000722054 [Byte] (F057606)	ABC-type oligopeptide transport system, periplasmic component OS=Pediococcus pentosaceus (strain ATCC 25745 / CCUG 21536 / LMG 10740 / 183-1w) OX=278197 GN=PEPE_0396 PE=3 SV=1	Q03H30_PEDPA	PEPE_0396	Uniprot_Pediococcus_pentosaceus_strain_ATCC.fasta	60453.9	1	29	37	97	0.00211	0.537	LIEAANTTDAGNTEKR	K	W	0.997	61.2	25	61.2	1703.86	1723	15015.3	472	487
sample Treatment	2022 5:30:55 PM;File Size: 1000722054 [Byte] (F057606)	ABC-type oligopeptide transport system, periplasmic component OS=Pediococcus pentosaceus (strain ATCC 25745 / CCUG 21536 / LMG 10740 / 183-1w) OX=278197 GN=PEPE_0396 PE=3 SV=1	Q03H30_PEDPA	PEPE_0396	Uniprot_Pediococcus_pentosaceus_strain_ATCC.fasta	60453.9	1	29	37	97	0.00211	0.537	LMAEGLK	K	E	0.9	32.9	25	23.4	761.423	1999	108524	369	375
sample Treatment	2022 5:30:55 PM;File Size: 1000722054 [Byte] (F057606)	ABC-type oligopeptide transport system, periplasmic component OS=Pediococcus pentosaceus (strain ATCC 25745 / CCUG 21536 / LMG 10740 / 183-1w) OX=278197 GN=PEPE_0396 PE=3 SV=1	Q03H30_PEDPA	PEPE_0396	Uniprot_Pediococcus_pentosaceus_strain_ATCC.fasta	60453.9	1	29	37	97	0.00211	0.537	LMAEGLKEEGMR	K	S	0.997	58.3	25	58.3	1363.67	2240.5	261797	369	380
sample Treatment	2022 5:30:55 PM;File Size: 1000722054 [Byte] (F057606)	ABC-type oligopeptide transport system, periplasmic component OS=Pediococcus pentosaceus (strain ATCC 25745 / CCUG 21536 / LMG 10740 / 183-1w) OX=278197 GN=PEPE_0396 PE=3 SV=1	Q03H30_PEDPA	PEPE_0396	Uniprot_Pediococcus_pentosaceus_strain_ATCC.fasta	60453.9	1	29	37	97	0.00211	0.537	LTVTLDRPISYFK	K	L	0.997	57.4	25	57.4	1552.87	3252.5	1142950	162	174
sample Treatment	2022 5:30:55 PM;File Size: 1000722054 [Byte] (F057606)	ABC-type oligopeptide transport system, periplasmic component OS=Pediococcus pentosaceus (strain ATCC 25745 / CCUG 21536 / LMG 10740 / 183-1w) OX=278197 GN=PEPE_0396 PE=3 SV=1	Q03H30_PEDPA	PEPE_0396	Uniprot_Pediococcus_pentosaceus_strain_ATCC.fasta	60453.9	1	29	37	97	0.00211	0.537	MDTLNWK	K	V	0.9	52.9	25	52.9	907.434	2580.5	574543	238	244
sample Treatment	2022 5:30:55 PM;File Size: 1000722054 [Byte] (F057606)	ABC-type oligopeptide transport system, periplasmic component OS=Pediococcus pentosaceus (strain ATCC 25745 / CCUG 21536 / LMG 10740 / 183-1w) OX=278197 GN=PEPE_0396 PE=3 SV=1	Q03H30_PEDPA	PEPE_0396	Uniprot_Pediococcus_pentosaceus_strain_ATCC.fasta	60453.9	1	29	37	97	0.00211	0.537	MEGWTGSNLSWK	R	L	0.997	74.3	25	74.3	1395.64	3028	852796	212	223
sample Treatment	2022 5:30:55 PM;File Size: 1000722054 [Byte] (F057606)	ABC-type oligopeptide transport system, periplasmic component OS=Pediococcus pentosaceus (strain ATCC 25745 / CCUG 21536 / LMG 10740 / 183-1w) OX=278197 GN=PEPE_0396 PE=3 SV=1	Q03H30_PEDPA	PEPE_0396	Uniprot_Pediococcus_pentosaceus_strain_ATCC.fasta	60453.9	1	29	37	97	0.00211	0.537	NNKVENAIATK	K	T	0.997	51.8	25	51.8	1201.65	1717.5	63282.2	72	82
sample Treatment	2022 5:30:55 PM;File Size: 1000722054 [Byte] (F057606)	ABC-type oligopeptide transport system, periplasmic component OS=Pediococcus pentosaceus (strain ATCC 25745 / CCUG 21536 / LMG 10740 / 183-1w) OX=278197 GN=PEPE_0396 PE=3 SV=1	Q03H30_PEDPA	PEPE_0396	Uniprot_Pediococcus_pentosaceus_strain_ATCC.fasta	60453.9	1	29	37	97	0.00211	0.537	QSTEFLQSAFEK	K	I	0.997	51.9	25	51.9	1414.68	3034.5	276099	396	407
sample Treatment	2022 5:30:55 PM;File Size: 1000722054 [Byte] (F057606)	ABC-type oligopeptide transport system, periplasmic component OS=Pediococcus pentosaceus (strain ATCC 25745 / CCUG 21536 / LMG 10740 / 183-1w) OX=278197 GN=PEPE_0396 PE=3 SV=1	Q03H30_PEDPA	PEPE_0396	Uniprot_Pediococcus_pentosaceus_strain_ATCC.fasta	60453.9	1	29	37	97	0.00211	0.537	RWDDMLK	K	A	0.9	30.6	25	30.6	963.472	2548.5	151195	487	493
sample Treatment	2022 5:30:55 PM;File Size: 1000722054 [Byte] (F057606)	ABC-type oligopeptide transport system, periplasmic component OS=Pediococcus pentosaceus (strain ATCC 25745 / CCUG 21536 / LMG 10740 / 183-1w) OX=278197 GN=PEPE_0396 PE=3 SV=1	Q03H30_PEDPA	PEPE_0396	Uniprot_Pediococcus_pentosaceus_strain_ATCC.fasta	60453.9	1	29	37	97	0.00211	0.537	SASEYNLK	K	E	0.99	48	25	48	911.447	1706.5	491242	357	364
sample Treatment	2022 5:30:55 PM;File Size: 1000722054 [Byte] (F057606)	ABC-type oligopeptide transport system, periplasmic component OS=Pediococcus pentosaceus (strain ATCC 25745 / CCUG 21536 / LMG 10740 / 183-1w) OX=278197 GN=PEPE_0396 PE=3 SV=1	Q03H30_PEDPA	PEPE_0396	Uniprot_Pediococcus_pentosaceus_strain_ATCC.fasta	60453.9	1	29	37	97	0.00211	0.537	SLNFQLLSDDTTAAK	R	Q	0.997	76.3	25	76.3	1623.82	3346	1184030	381	395
sample Treatment	2022 5:30:55 PM;File Size: 1000722054 [Byte] (F057606)	ABC-type oligopeptide transport system, periplasmic component OS=Pediococcus pentosaceus (strain ATCC 25745 / CCUG 21536 / LMG 10740 / 183-1w) OX=278197 GN=PEPE_0396 PE=3 SV=1	Q03H30_PEDPA	PEPE_0396	Uniprot_Pediococcus_pentosaceus_strain_ATCC.fasta	60453.9	1	29	37	97	0.00211	0.537	TANIQESAELATMDQSK	K	V	0.997	110	25	110	1836.86	2622	444171	33	49
sample Treatment	2022 5:30:55 PM;File Size: 1000722054 [Byte] (F057606)	ABC-type oligopeptide transport system, periplasmic component OS=Pediococcus pentosaceus (strain ATCC 25745 / CCUG 21536 / LMG 10740 / 183-1w) OX=278197 GN=PEPE_0396 PE=3 SV=1	Q03H30_PEDPA	PEPE_0396	Uniprot_Pediococcus_pentosaceus_strain_ATCC.fasta	60453.9	1	29	37	97	0.00211	0.537	TTVYNGPYR	K	M	0.996	49.6	25	49.6	1070.53	1936	1028860	203	211
sample Treatment	2022 5:30:55 PM;File Size: 1000722054 [Byte] (F057606)	ABC-type oligopeptide transport system, periplasmic component OS=Pediococcus pentosaceus (strain ATCC 25745 / CCUG 21536 / LMG 10740 / 183-1w) OX=278197 GN=PEPE_0396 PE=3 SV=1	Q03H30_PEDPA	PEPE_0396	Uniprot_Pediococcus_pentosaceus_strain_ATCC.fasta	60453.9	1	29	37	97	0.00211	0.537	TYTFTLR	K	K	0.9	33.1	25	33.1	901.478	2757.5	387293	91	97
sample Treatment	2022 5:30:55 PM;File Size: 1000722054 [Byte] (F057606)	ABC-type oligopeptide transport system, periplasmic component OS=Pediococcus pentosaceus (strain ATCC 25745 / CCUG 21536 / LMG 10740 / 183-1w) OX=278197 GN=PEPE_0396 PE=3 SV=1	Q03H30_PEDPA	PEPE_0396	Uniprot_Pediococcus_pentosaceus_strain_ATCC.fasta	60453.9	1	29	37	97	0.00211	0.537	VSLSNVPFK	K	N	0.997	68.7	25	68.7	990.562	2792.5	1160350	413	421
sample Treatment	2022 5:30:55 PM;File Size: 1000722054 [Byte] (F057606)	ABC-type oligopeptide transport system, periplasmic component OS=Pediococcus pentosaceus (strain ATCC 25745 / CCUG 21536 / LMG 10740 / 183-1w) OX=278197 GN=PEPE_0396 PE=3 SV=1	Q03H30_PEDPA	PEPE_0396	Uniprot_Pediococcus_pentosaceus_strain_ATCC.fasta	60453.9	1	29	37	97	0.00211	0.537	VTDVVGFTQLGSTEEGLYR	K	I	0.997	112	25	112	2071.03	3438.5	609931	50	68
sample Treatment	2022 5:30:55 PM;File Size: 1000722054 [Byte] (F057606)	ABC-type oligopeptide transport system, periplasmic component OS=Pediococcus pentosaceus (strain ATCC 25745 / CCUG 21536 / LMG 10740 / 183-1w) OX=278197 GN=PEPE_0396 PE=3 SV=1	Q03H30_PEDPA	PEPE_0396	Uniprot_Pediococcus_pentosaceus_strain_ATCC.fasta	60453.9	1	29	37	97	0.00211	0.537	WSNGDEVTAK	K	D	0.994	45.8	25	44.6	1106.51	1720.5	439451	102	111
sample Treatment	2022 5:30:55 PM;File Size: 1000722054 [Byte] (F057606)	ABC-type oligopeptide transport system, periplasmic component OS=Pediococcus pentosaceus (strain ATCC 25745 / CCUG 21536 / LMG 10740 / 183-1w) OX=278197 GN=PEPE_0396 PE=3 SV=1	Q03H30_PEDPA	PEPE_0396	Uniprot_Pediococcus_pentosaceus_strain_ATCC.fasta	60453.9	1	29	37	97	0.00211	0.537	YLNASTFYIEYNQK	K	K	0.997	76.5	25	76.5	1753.84	3218	463529	283	296
sample Treatment	2022 5:30:55 PM;File Size: 1000722054 [Byte] (F057606)	Glucose-6-phosphate isomerase OS=Pediococcus pentosaceus (strain ATCC 25745 / CCUG 21536 / LMG 10740 / 183-1w) OX=278197 GN=pgi PE=3 SV=1	G6PI_PEDPA	pgi	Uniprot_Pediococcus_pentosaceus_strain_ATCC.fasta	49654.8	1	11	16	44	0.000957	0.305	ADQDLDGLR	K	Y	0.991	42	25	42	1002.49	2065.5	2388320	344	352
sample Treatment	2022 5:30:55 PM;File Size: 1000722054 [Byte] (F057606)	Glucose-6-phosphate isomerase OS=Pediococcus pentosaceus (strain ATCC 25745 / CCUG 21536 / LMG 10740 / 183-1w) OX=278197 GN=pgi PE=3 SV=1	G6PI_PEDPA	pgi	Uniprot_Pediococcus_pentosaceus_strain_ATCC.fasta	49654.8	1	11	16	44	0.000957	0.305	DFSINVISK	R	S	0.988	39.8	25	39.8	1022.55	2979.5	752586	137	145
sample Treatment	2022 5:30:55 PM;File Size: 1000722054 [Byte] (F057606)	Glucose-6-phosphate isomerase OS=Pediococcus pentosaceus (strain ATCC 25745 / CCUG 21536 / LMG 10740 / 183-1w) OX=278197 GN=pgi PE=3 SV=1	G6PI_PEDPA	pgi	Uniprot_Pediococcus_pentosaceus_strain_ATCC.fasta	49654.8	1	11	16	44	0.000957	0.305	GAEDASNEYK	K	D	0.994	45.3	25	45.3	1083.46	1265	83791.1	233	242
sample Treatment	2022 5:30:55 PM;File Size: 1000722054 [Byte] (F057606)	Glucose-6-phosphate isomerase OS=Pediococcus pentosaceus (strain ATCC 25745 / CCUG 21536 / LMG 10740 / 183-1w) OX=278197 GN=pgi PE=3 SV=1	G6PI_PEDPA	pgi	Uniprot_Pediococcus_pentosaceus_strain_ATCC.fasta	49654.8	1	11	16	44	0.000957	0.305	GAEDASNEYKDADVTK	K	N	0.995	47.2	25	47.2	1712.76	1775	352640	233	248
sample Treatment	2022 5:30:55 PM;File Size: 1000722054 [Byte] (F057606)	Glucose-6-phosphate isomerase OS=Pediococcus pentosaceus (strain ATCC 25745 / CCUG 21536 / LMG 10740 / 183-1w) OX=278197 GN=pgi PE=3 SV=1	G6PI_PEDPA	pgi	Uniprot_Pediococcus_pentosaceus_strain_ATCC.fasta	49654.8	1	11	16	44	0.000957	0.305	GWIDLPSNYDKDEFAR	R	I	0.997	65.4	25	61	1925.9	3290.5	1923670	46	61
sample Treatment	2022 5:30:55 PM;File Size: 1000722054 [Byte] (F057606)	Glucose-6-phosphate isomerase OS=Pediococcus pentosaceus (strain ATCC 25745 / CCUG 21536 / LMG 10740 / 183-1w) OX=278197 GN=pgi PE=3 SV=1	G6PI_PEDPA	pgi	Uniprot_Pediococcus_pentosaceus_strain_ATCC.fasta	49654.8	1	11	16	44	0.000957	0.305	IYATTDR	R	A	0.9	36.1	25	36.1	839.426	1379.5	741472	176	182
sample Treatment	2022 5:30:55 PM;File Size: 1000722054 [Byte] (F057606)	Glucose-6-phosphate isomerase OS=Pediococcus pentosaceus (strain ATCC 25745 / CCUG 21536 / LMG 10740 / 183-1w) OX=278197 GN=pgi PE=3 SV=1	G6PI_PEDPA	pgi	Uniprot_Pediococcus_pentosaceus_strain_ATCC.fasta	49654.8	1	11	16	44	0.000957	0.305	NDSEVFVAIGIGGSYLGAR	R	A	0.997	77.6	25	77.6	1924.98	3856	251508	71	89
sample Treatment	2022 5:30:55 PM;File Size: 1000722054 [Byte] (F057606)	Glucose-6-phosphate isomerase OS=Pediococcus pentosaceus (strain ATCC 25745 / CCUG 21536 / LMG 10740 / 183-1w) OX=278197 GN=pgi PE=3 SV=1	G6PI_PEDPA	pgi	Uniprot_Pediococcus_pentosaceus_strain_ATCC.fasta	49654.8	1	11	16	44	0.000957	0.305	NLMETVINVEKPNHDIDIPK	R	A	0.997	61.5	25	61.5	2319.2	3345	2237890	324	343
sample Treatment	2022 5:30:55 PM;File Size: 1000722054 [Byte] (F057606)	Glucose-6-phosphate isomerase OS=Pediococcus pentosaceus (strain ATCC 25745 / CCUG 21536 / LMG 10740 / 183-1w) OX=278197 GN=pgi PE=3 SV=1	G6PI_PEDPA	pgi	Uniprot_Pediococcus_pentosaceus_strain_ATCC.fasta	49654.8	1	11	16	44	0.000957	0.305	QLMGESEGK	K	D	0.942	30.6	25	30.6	978.456	1569	186349	287	295
sample Treatment	2022 5:30:55 PM;File Size: 1000722054 [Byte] (F057606)	Glucose-6-phosphate isomerase OS=Pediococcus pentosaceus (strain ATCC 25745 / CCUG 21536 / LMG 10740 / 183-1w) OX=278197 GN=pgi PE=3 SV=1	G6PI_PEDPA	pgi	Uniprot_Pediococcus_pentosaceus_strain_ATCC.fasta	49654.8	1	11	16	44	0.000957	0.305	SGTTTEPAIAFR	K	V	0.997	60.3	25	60.3	1250.64	2536	2196440	146	157
sample Treatment	2022 5:30:55 PM;File Size: 1000722054 [Byte] (F057606)	Glucose-6-phosphate isomerase OS=Pediococcus pentosaceus (strain ATCC 25745 / CCUG 21536 / LMG 10740 / 183-1w) OX=278197 GN=pgi PE=3 SV=1	G6PI_PEDPA	pgi	Uniprot_Pediococcus_pentosaceus_strain_ATCC.fasta	49654.8	1	11	16	44	0.000957	0.305	TEADAENYEEFVVPDDIGGR	K	F	0.997	117	25	117	2225.98	3289	319659	189	208
sample Treatment	2022 5:30:55 PM;File Size: 1000722054 [Byte] (F057606)	Peptide chain release factor 2 OS=Pediococcus pentosaceus (strain ATCC 25745 / CCUG 21536 / LMG 10740 / 183-1w) OX=278197 GN=prfB PE=3 SV=1	Q03GZ6_PEDPA	prfB	Uniprot_Pediococcus_pentosaceus_strain_ATCC.fasta	38847.4	0.989	1	1	2	4.35e-05	0.0466	ITHLPTGIVVASQAER	R	S	0.992	43.2	25	43.2	1691.94	2722.5	241270	234	249
sample Treatment	2022 5:30:55 PM;File Size: 1000722054 [Byte] (F057606)	Glycerol-3-phosphate dehydrogenase [NAD(P)+] OS=Pediococcus pentosaceus (strain ATCC 25745 / CCUG 21536 / LMG 10740 / 183-1w) OX=278197 GN=gpsA PE=3 SV=1	GPDA_PEDPA	gpsA	Uniprot_Pediococcus_pentosaceus_strain_ATCC.fasta	36492.6	0.95	1	1	2	4.35e-05	0.0414	LSEVLAEEIPSELR	R	Q	0.997	77.5	25	77.5	1584.85	3428.5	120035	120	133
sample Treatment	2022 5:30:55 PM;File Size: 1000722054 [Byte] (F057606)	3-oxoacyl-[acyl-carrier-protein] synthase 2 OS=Pediococcus pentosaceus (strain ATCC 25745 / CCUG 21536 / LMG 10740 / 183-1w) OX=278197 GN=PEPE_0859 PE=3 SV=1	Q03FV4_PEDPA	PEPE_0859	Uniprot_Pediococcus_pentosaceus_strain_ATCC.fasta	43425.8	1	8	13	29	0.00063	0.282	AIESIFTENDHYK	K	V	0.997	56.6	25	56.6	1566.74	2864	781296	316	328
sample Treatment	2022 5:30:55 PM;File Size: 1000722054 [Byte] (F057606)	3-oxoacyl-[acyl-carrier-protein] synthase 2 OS=Pediococcus pentosaceus (strain ATCC 25745 / CCUG 21536 / LMG 10740 / 183-1w) OX=278197 GN=PEPE_0859 PE=3 SV=1	Q03FV4_PEDPA	PEPE_0859	Uniprot_Pediococcus_pentosaceus_strain_ATCC.fasta	43425.8	1	8	13	29	0.00063	0.282	AMQMAMDEGGIK	R	A	0.997	59	25	59	1281.56	2494.5	160662	281	292
sample Treatment	2022 5:30:55 PM;File Size: 1000722054 [Byte] (F057606)	3-oxoacyl-[acyl-carrier-protein] synthase 2 OS=Pediococcus pentosaceus (strain ATCC 25745 / CCUG 21536 / LMG 10740 / 183-1w) OX=278197 GN=PEPE_0859 PE=3 SV=1	Q03FV4_PEDPA	PEPE_0859	Uniprot_Pediococcus_pentosaceus_strain_ATCC.fasta	43425.8	1	8	13	29	0.00063	0.282	ANDIDYINAHGTSTHANDSAESK	K	A	0.997	44.9	25	44.9	2431.08	2029	906911	293	315
sample Treatment	2022 5:30:55 PM;File Size: 1000722054 [Byte] (F057606)	3-oxoacyl-[acyl-carrier-protein] synthase 2 OS=Pediococcus pentosaceus (strain ATCC 25745 / CCUG 21536 / LMG 10740 / 183-1w) OX=278197 GN=PEPE_0859 PE=3 SV=1	Q03FV4_PEDPA	PEPE_0859	Uniprot_Pediococcus_pentosaceus_strain_ATCC.fasta	43425.8	1	8	13	29	0.00063	0.282	DPEVNIPLVTEDNR	K	K	0.997	67.7	25	67.7	1610.8	3121.5	607741	370	383
sample Treatment	2022 5:30:55 PM;File Size: 1000722054 [Byte] (F057606)	3-oxoacyl-[acyl-carrier-protein] synthase 2 OS=Pediococcus pentosaceus (strain ATCC 25745 / CCUG 21536 / LMG 10740 / 183-1w) OX=278197 GN=PEPE_0859 PE=3 SV=1	Q03FV4_PEDPA	PEPE_0859	Uniprot_Pediococcus_pentosaceus_strain_ATCC.fasta	43425.8	1	8	13	29	0.00063	0.282	DPEVNIPLVTEDNRK	K	A	0.994	46.1	25	46.1	1738.9	2931.5	433088	370	384
sample Treatment	2022 5:30:55 PM;File Size: 1000722054 [Byte] (F057606)	3-oxoacyl-[acyl-carrier-protein] synthase 2 OS=Pediococcus pentosaceus (strain ATCC 25745 / CCUG 21536 / LMG 10740 / 183-1w) OX=278197 GN=PEPE_0859 PE=3 SV=1	Q03FV4_PEDPA	PEPE_0859	Uniprot_Pediococcus_pentosaceus_strain_ATCC.fasta	43425.8	1	8	13	29	0.00063	0.282	ESFIQGLNSSK	R	V	0.997	56.5	25	56.5	1209.61	2724.5	832532	21	31
sample Treatment	2022 5:30:55 PM;File Size: 1000722054 [Byte] (F057606)	3-oxoacyl-[acyl-carrier-protein] synthase 2 OS=Pediococcus pentosaceus (strain ATCC 25745 / CCUG 21536 / LMG 10740 / 183-1w) OX=278197 GN=PEPE_0859 PE=3 SV=1	Q03FV4_PEDPA	PEPE_0859	Uniprot_Pediococcus_pentosaceus_strain_ATCC.fasta	43425.8	1	8	13	29	0.00063	0.282	NTSQAIVTACASANNAIGNAFHHIK	K	N	0.997	63.2	25	63.2	2610.28	3445	668438	154	178
sample Treatment	2022 5:30:55 PM;File Size: 1000722054 [Byte] (F057606)	3-oxoacyl-[acyl-carrier-protein] synthase 2 OS=Pediococcus pentosaceus (strain ATCC 25745 / CCUG 21536 / LMG 10740 / 183-1w) OX=278197 GN=PEPE_0859 PE=3 SV=1	Q03FV4_PEDPA	PEPE_0859	Uniprot_Pediococcus_pentosaceus_strain_ATCC.fasta	43425.8	1	8	13	29	0.00063	0.282	VVVTGMGALTPLGNDR	R	E	0.997	75.5	25	75.5	1615.85	3175	635593	5	20
sample Treatment	2022 5:30:55 PM;File Size: 1000722054 [Byte] (F057606)	Heat shock protein Hsp20 OS=Pediococcus pentosaceus (strain ATCC 25745 / CCUG 21536 / LMG 10740 / 183-1w) OX=278197 GN=PEPE_1643 PE=3 SV=1	Q03DQ8_PEDPA	PEPE_1643	Uniprot_Pediococcus_pentosaceus_strain_ATCC.fasta	16056.5	1	7	8	18	0.000391	0.536	DSFADHEDEKHNVTMTER	K	S	0.997	70	25	70	2160.93	1879.5	1018780	77	94
sample Treatment	2022 5:30:55 PM;File Size: 1000722054 [Byte] (F057606)	Heat shock protein Hsp20 OS=Pediococcus pentosaceus (strain ATCC 25745 / CCUG 21536 / LMG 10740 / 183-1w) OX=278197 GN=PEPE_1643 PE=3 SV=1	Q03DQ8_PEDPA	PEPE_1643	Uniprot_Pediococcus_pentosaceus_strain_ATCC.fasta	16056.5	1	7	8	18	0.000391	0.536	GFFNNGWDGTSK	R	T	0.997	68.9	25	68.9	1329.59	3017.5	230249	23	34
sample Treatment	2022 5:30:55 PM;File Size: 1000722054 [Byte] (F057606)	Heat shock protein Hsp20 OS=Pediococcus pentosaceus (strain ATCC 25745 / CCUG 21536 / LMG 10740 / 183-1w) OX=278197 GN=PEPE_1643 PE=3 SV=1	Q03DQ8_PEDPA	PEPE_1643	Uniprot_Pediococcus_pentosaceus_strain_ATCC.fasta	16056.5	1	7	8	18	0.000391	0.536	IDVPGIDK	K	K	0.99	48	25	38	856.478	2490.5	404204	51	58
sample Treatment	2022 5:30:55 PM;File Size: 1000722054 [Byte] (F057606)	Heat shock protein Hsp20 OS=Pediococcus pentosaceus (strain ATCC 25745 / CCUG 21536 / LMG 10740 / 183-1w) OX=278197 GN=PEPE_1643 PE=3 SV=1	Q03DQ8_PEDPA	PEPE_1643	Uniprot_Pediococcus_pentosaceus_strain_ATCC.fasta	16056.5	1	7	8	18	0.000391	0.536	IDVPGIDKK	K	D	0.952	31.5	25	31.5	984.573	2240	80156.2	51	59
sample Treatment	2022 5:30:55 PM;File Size: 1000722054 [Byte] (F057606)	Heat shock protein Hsp20 OS=Pediococcus pentosaceus (strain ATCC 25745 / CCUG 21536 / LMG 10740 / 183-1w) OX=278197 GN=PEPE_1643 PE=3 SV=1	Q03DQ8_PEDPA	PEPE_1643	Uniprot_Pediococcus_pentosaceus_strain_ATCC.fasta	16056.5	1	7	8	18	0.000391	0.536	LDYQDGVLNVEVK	K	K	0.997	87.8	25	87.8	1491.77	3032	593855	63	75
sample Treatment	2022 5:30:55 PM;File Size: 1000722054 [Byte] (F057606)	Heat shock protein Hsp20 OS=Pediococcus pentosaceus (strain ATCC 25745 / CCUG 21536 / LMG 10740 / 183-1w) OX=278197 GN=PEPE_1643 PE=3 SV=1	Q03DQ8_PEDPA	PEPE_1643	Uniprot_Pediococcus_pentosaceus_strain_ATCC.fasta	16056.5	1	7	8	18	0.000391	0.536	TDVSESDTDYK	K	V	0.997	81.5	25	81.5	1259.53	1594	383361	38	48
sample Treatment	2022 5:30:55 PM;File Size: 1000722054 [Byte] (F057606)	Heat shock protein Hsp20 OS=Pediococcus pentosaceus (strain ATCC 25745 / CCUG 21536 / LMG 10740 / 183-1w) OX=278197 GN=PEPE_1643 PE=3 SV=1	Q03DQ8_PEDPA	PEPE_1643	Uniprot_Pediococcus_pentosaceus_strain_ATCC.fasta	16056.5	1	7	8	18	0.000391	0.536	VDNGVLSITLPK	K	A	0.997	62.1	25	62.1	1255.73	3289	461142	117	128
sample Treatment	2022 5:30:55 PM;File Size: 1000722054 [Byte] (F057606)	ATP-dependent protease subunit HslV OS=Pediococcus pentosaceus (strain ATCC 25745 / CCUG 21536 / LMG 10740 / 183-1w) OX=278197 GN=hslV PE=3 SV=1	HSLV_PEDPA	hslV	Uniprot_Pediococcus_pentosaceus_strain_ATCC.fasta	19868.4	0.911	1	1	2	4.35e-05	0.0543	LSEYSGNLQR	K	A	0.995	46.5	25	46.5	1166.58	1936.5	96723.4	72	81
sample Treatment	2022 5:30:55 PM;File Size: 1000722054 [Byte] (F057606)	Glyceraldehyde-3-phosphate dehydrogenase OS=Pediococcus pentosaceus (strain ATCC 25745 / CCUG 21536 / LMG 10740 / 183-1w) OX=278197 GN=PEPE_0459 PE=3 SV=1	Q03GW8_PEDPA	PEPE_0459	Uniprot_Pediococcus_pentosaceus_strain_ATCC.fasta	36627.2	1	11	17	70	0.00152	0.444	AAAANTIPHSTGAAK	R	A	0.997	92.7	25	92.7	1380.72	1568	9935390	206	220
sample Treatment	2022 5:30:55 PM;File Size: 1000722054 [Byte] (F057606)	Glyceraldehyde-3-phosphate dehydrogenase OS=Pediococcus pentosaceus (strain ATCC 25745 / CCUG 21536 / LMG 10740 / 183-1w) OX=278197 GN=PEPE_0459 PE=3 SV=1	Q03GW8_PEDPA	PEPE_0459	Uniprot_Pediococcus_pentosaceus_strain_ATCC.fasta	36627.2	1	11	17	70	0.00152	0.444	AIGLVIPELNGK	K	L	0.992	42.7	25	42.7	1223.74	3470	308658	221	232
sample Treatment	2022 5:30:55 PM;File Size: 1000722054 [Byte] (F057606)	Glyceraldehyde-3-phosphate dehydrogenase OS=Pediococcus pentosaceus (strain ATCC 25745 / CCUG 21536 / LMG 10740 / 183-1w) OX=278197 GN=PEPE_0459 PE=3 SV=1	Q03GW8_PEDPA	PEPE_0459	Uniprot_Pediococcus_pentosaceus_strain_ATCC.fasta	36627.2	1	11	17	70	0.00152	0.444	AQDIPWVK	K	E	0.99	49.7	25	49.7	956.52	2760	4534320	84	91
sample Treatment	2022 5:30:55 PM;File Size: 1000722054 [Byte] (F057606)	Glyceraldehyde-3-phosphate dehydrogenase OS=Pediococcus pentosaceus (strain ATCC 25745 / CCUG 21536 / LMG 10740 / 183-1w) OX=278197 GN=PEPE_0459 PE=3 SV=1	Q03GW8_PEDPA	PEPE_0459	Uniprot_Pediococcus_pentosaceus_strain_ATCC.fasta	36627.2	1	11	17	70	0.00152	0.444	DVTVEEVNAAIK	K	K	0.997	66.4	25	66.4	1287.68	2735.5	526320	257	268
sample Treatment	2022 5:30:55 PM;File Size: 1000722054 [Byte] (F057606)	Glyceraldehyde-3-phosphate dehydrogenase OS=Pediococcus pentosaceus (strain ATCC 25745 / CCUG 21536 / LMG 10740 / 183-1w) OX=278197 GN=PEPE_0459 PE=3 SV=1	Q03GW8_PEDPA	PEPE_0459	Uniprot_Pediococcus_pentosaceus_strain_ATCC.fasta	36627.2	1	11	17	70	0.00152	0.444	EDGVDFVLECTGFYTSK	K	E	0.997	73.7	25	73.7	1966.87	3828.5	1621940	92	108
sample Treatment	2022 5:30:55 PM;File Size: 1000722054 [Byte] (F057606)	Glyceraldehyde-3-phosphate dehydrogenase OS=Pediococcus pentosaceus (strain ATCC 25745 / CCUG 21536 / LMG 10740 / 183-1w) OX=278197 GN=PEPE_0459 PE=3 SV=1	Q03GW8_PEDPA	PEPE_0459	Uniprot_Pediococcus_pentosaceus_strain_ATCC.fasta	36627.2	1	11	17	70	0.00152	0.444	IGINGFGR	K	I	0.99	59.3	25	59.3	833.463	2537.5	551208	5	12
sample Treatment	2022 5:30:55 PM;File Size: 1000722054 [Byte] (F057606)	Glyceraldehyde-3-phosphate dehydrogenase OS=Pediococcus pentosaceus (strain ATCC 25745 / CCUG 21536 / LMG 10740 / 183-1w) OX=278197 GN=PEPE_0459 PE=3 SV=1	Q03GW8_PEDPA	PEPE_0459	Uniprot_Pediococcus_pentosaceus_strain_ATCC.fasta	36627.2	1	11	17	70	0.00152	0.444	SQAHLDAGAK	K	R	0.99	41.4	25	40	997.506	1109.5	51621	111	120
sample Treatment	2022 5:30:55 PM;File Size: 1000722054 [Byte] (F057606)	Glyceraldehyde-3-phosphate dehydrogenase OS=Pediococcus pentosaceus (strain ATCC 25745 / CCUG 21536 / LMG 10740 / 183-1w) OX=278197 GN=PEPE_0459 PE=3 SV=1	Q03GW8_PEDPA	PEPE_0459	Uniprot_Pediococcus_pentosaceus_strain_ATCC.fasta	36627.2	1	11	17	70	0.00152	0.444	TVAWYDNEYGFTCQMVR	K	T	0.997	92.2	25	92.2	2139.93	3466.5	528182	316	332
sample Treatment	2022 5:30:55 PM;File Size: 1000722054 [Byte] (F057606)	Glyceraldehyde-3-phosphate dehydrogenase OS=Pediococcus pentosaceus (strain ATCC 25745 / CCUG 21536 / LMG 10740 / 183-1w) OX=278197 GN=PEPE_0459 PE=3 SV=1	Q03GW8_PEDPA	PEPE_0459	Uniprot_Pediococcus_pentosaceus_strain_ATCC.fasta	36627.2	1	11	17	70	0.00152	0.444	TVVYNVNDDVLTADDR	K	I	0.997	108	25	108	1808.87	2881.5	3833970	134	149
sample Treatment	2022 5:30:55 PM;File Size: 1000722054 [Byte] (F057606)	Glyceraldehyde-3-phosphate dehydrogenase OS=Pediococcus pentosaceus (strain ATCC 25745 / CCUG 21536 / LMG 10740 / 183-1w) OX=278197 GN=PEPE_0459 PE=3 SV=1	Q03GW8_PEDPA	PEPE_0459	Uniprot_Pediococcus_pentosaceus_strain_ATCC.fasta	36627.2	1	11	17	70	0.00152	0.444	VLVSAPAGSDLK	R	T	0.997	67.5	25	67.5	1156.66	2363.5	5616820	122	133
sample Treatment	2022 5:30:55 PM;File Size: 1000722054 [Byte] (F057606)	Glyceraldehyde-3-phosphate dehydrogenase OS=Pediococcus pentosaceus (strain ATCC 25745 / CCUG 21536 / LMG 10740 / 183-1w) OX=278197 GN=PEPE_0459 PE=3 SV=1	Q03GW8_PEDPA	PEPE_0459	Uniprot_Pediococcus_pentosaceus_strain_ATCC.fasta	36627.2	1	11	17	70	0.00152	0.444	YDSTHGTFAGEVSATDNSIIVDGK	K	E	0.997	96.3	25	96.3	2484.15	2973	2141040	51	74
sample Treatment	2022 5:30:55 PM;File Size: 1000722054 [Byte] (F057606)	Signal peptidase I OS=Pediococcus pentosaceus (strain ATCC 25745 / CCUG 21536 / LMG 10740 / 183-1w) OX=278197 GN=PEPE_1841 PE=3 SV=1	Q03D62_PEDPA	PEPE_1841	Uniprot_Pediococcus_pentosaceus_strain_ATCC.fasta	21839.5	1	4	4	7	0.000152	0.312	DSYFVLGDHR	K	S	0.911	28.8	25	28.8	1208.57	2656.5	151548	141	150
sample Treatment	2022 5:30:55 PM;File Size: 1000722054 [Byte] (F057606)	Signal peptidase I OS=Pediococcus pentosaceus (strain ATCC 25745 / CCUG 21536 / LMG 10740 / 183-1w) OX=278197 GN=PEPE_1841 PE=3 SV=1	Q03D62_PEDPA	PEPE_1841	Uniprot_Pediococcus_pentosaceus_strain_ATCC.fasta	21839.5	1	4	4	7	0.000152	0.312	MSVIVFDAHGEDPAATEPVDYVK	R	R	0.997	74.4	25	74.4	2490.19	3330	177796	57	79
sample Treatment	2022 5:30:55 PM;File Size: 1000722054 [Byte] (F057606)	Signal peptidase I OS=Pediococcus pentosaceus (strain ATCC 25745 / CCUG 21536 / LMG 10740 / 183-1w) OX=278197 GN=PEPE_1841 PE=3 SV=1	Q03D62_PEDPA	PEPE_1841	Uniprot_Pediococcus_pentosaceus_strain_ATCC.fasta	21839.5	1	4	4	7	0.000152	0.312	TTGTGNWTLASIANK	R	Y	0.997	65.5	25	65.5	1534.79	3096	123357	114	128
sample Treatment	2022 5:30:55 PM;File Size: 1000722054 [Byte] (F057606)	Signal peptidase I OS=Pediococcus pentosaceus (strain ATCC 25745 / CCUG 21536 / LMG 10740 / 183-1w) OX=278197 GN=PEPE_1841 PE=3 SV=1	Q03D62_PEDPA	PEPE_1841	Uniprot_Pediococcus_pentosaceus_strain_ATCC.fasta	21839.5	1	4	4	7	0.000152	0.312	VIGVPGDTISYK	R	D	0.991	41.6	25	41.6	1248.68	2679.5	247465	81	92
sample Treatment	2022 5:30:55 PM;File Size: 1000722054 [Byte] (F057606)	Uncharacterized protein OS=Pediococcus pentosaceus (strain ATCC 25745 / CCUG 21536 / LMG 10740 / 183-1w) OX=278197 GN=PEPE_1671 PE=4 SV=1	Q03DN0_PEDPA	PEPE_1671	Uniprot_Pediococcus_pentosaceus_strain_ATCC.fasta	20303.9	0.95	1	1	2	4.35e-05	0.0663	EIQETVQDSIQR	K	H	0.997	62.5	25	60.3	1445.72	2300.5	79654.6	145	156
sample Treatment	2022 5:30:55 PM;File Size: 1000722054 [Byte] (F057606)	Dipeptidase OS=Pediococcus pentosaceus (strain ATCC 25745 / CCUG 21536 / LMG 10740 / 183-1w) OX=278197 GN=PEPE_1747 PE=3 SV=1	Q03DF4_PEDPA	PEPE_1747	Uniprot_Pediococcus_pentosaceus_strain_ATCC.fasta	53157.7	1	3	4	6	0.00013	0.106	HSAVPNIDPDKDGIYDESGFNEK	R	N	0.997	52.6	25	52.6	2547.16	2766	268449	69	91
sample Treatment	2022 5:30:55 PM;File Size: 1000722054 [Byte] (F057606)	Dipeptidase OS=Pediococcus pentosaceus (strain ATCC 25745 / CCUG 21536 / LMG 10740 / 183-1w) OX=278197 GN=PEPE_1747 PE=3 SV=1	Q03DF4_PEDPA	PEPE_1747	Uniprot_Pediococcus_pentosaceus_strain_ATCC.fasta	53157.7	1	3	4	6	0.00013	0.106	IFGTDTEKDR	R	H	0.977	35.9	25	35.9	1181.58	1783.5	153958	232	241
sample Treatment	2022 5:30:55 PM;File Size: 1000722054 [Byte] (F057606)	Dipeptidase OS=Pediococcus pentosaceus (strain ATCC 25745 / CCUG 21536 / LMG 10740 / 183-1w) OX=278197 GN=PEPE_1747 PE=3 SV=1	Q03DF4_PEDPA	PEPE_1747	Uniprot_Pediococcus_pentosaceus_strain_ATCC.fasta	53157.7	1	3	4	6	0.00013	0.106	TMNHFNDLLASGLLLSK	R	L	0.994	47.1	25	47.1	1873.98	3829	51549.2	447	463
sample Treatment	2022 5:30:55 PM;File Size: 1000722054 [Byte] (F057606)	Transcription termination/antitermination protein NusA OS=Pediococcus pentosaceus (strain ATCC 25745 / CCUG 21536 / LMG 10740 / 183-1w) OX=278197 GN=nusA PE=3 SV=1	Q03FS6_PEDPA	nusA	Uniprot_Pediococcus_pentosaceus_strain_ATCC.fasta	40820.5	1	7	8	15	0.000326	0.254	EMITALDILEK	K	E	0.991	42.3	25	37.9	1275.69	3761.5	126917	4	14
sample Treatment	2022 5:30:55 PM;File Size: 1000722054 [Byte] (F057606)	Transcription termination/antitermination protein NusA OS=Pediococcus pentosaceus (strain ATCC 25745 / CCUG 21536 / LMG 10740 / 183-1w) OX=278197 GN=nusA PE=3 SV=1	Q03FS6_PEDPA	nusA	Uniprot_Pediococcus_pentosaceus_strain_ATCC.fasta	40820.5	1	7	8	15	0.000326	0.254	GPQIFASR	K	T	0.99	48.5	25	48.5	875.473	2196	257052	191	198
sample Treatment	2022 5:30:55 PM;File Size: 1000722054 [Byte] (F057606)	Transcription termination/antitermination protein NusA OS=Pediococcus pentosaceus (strain ATCC 25745 / CCUG 21536 / LMG 10740 / 183-1w) OX=278197 GN=nusA PE=3 SV=1	Q03FS6_PEDPA	nusA	Uniprot_Pediococcus_pentosaceus_strain_ATCC.fasta	40820.5	1	7	8	15	0.000326	0.254	KGDIHVYAVK	R	K	0.973	35	25	26.9	1129.64	1819	161836	53	62
sample Treatment	2022 5:30:55 PM;File Size: 1000722054 [Byte] (F057606)	Transcription termination/antitermination protein NusA OS=Pediococcus pentosaceus (strain ATCC 25745 / CCUG 21536 / LMG 10740 / 183-1w) OX=278197 GN=nusA PE=3 SV=1	Q03FS6_PEDPA	nusA	Uniprot_Pediococcus_pentosaceus_strain_ATCC.fasta	40820.5	1	7	8	15	0.000326	0.254	NYGQAQNVEVEFNDR	R	K	0.993	44.3	25	44.3	1782.8	2608	31043.1	38	52
sample Treatment	2022 5:30:55 PM;File Size: 1000722054 [Byte] (F057606)	Transcription termination/antitermination protein NusA OS=Pediococcus pentosaceus (strain ATCC 25745 / CCUG 21536 / LMG 10740 / 183-1w) OX=278197 GN=nusA PE=3 SV=1	Q03FS6_PEDPA	nusA	Uniprot_Pediococcus_pentosaceus_strain_ATCC.fasta	40820.5	1	7	8	15	0.000326	0.254	SDQIPGEQYEPHDHIK	K	V	0.997	44.8	25	42.8	1892.88	2218	470065	164	179
sample Treatment	2022 5:30:55 PM;File Size: 1000722054 [Byte] (F057606)	Transcription termination/antitermination protein NusA OS=Pediococcus pentosaceus (strain ATCC 25745 / CCUG 21536 / LMG 10740 / 183-1w) OX=278197 GN=nusA PE=3 SV=1	Q03FS6_PEDPA	nusA	Uniprot_Pediococcus_pentosaceus_strain_ATCC.fasta	40820.5	1	7	8	15	0.000326	0.254	SNDPDIDAVGTCVGAK	R	G	0.997	78.1	25	78.1	1618.74	2400	283781	239	254
sample Treatment	2022 5:30:55 PM;File Size: 1000722054 [Byte] (F057606)	Transcription termination/antitermination protein NusA OS=Pediococcus pentosaceus (strain ATCC 25745 / CCUG 21536 / LMG 10740 / 183-1w) OX=278197 GN=nusA PE=3 SV=1	Q03FS6_PEDPA	nusA	Uniprot_Pediococcus_pentosaceus_strain_ATCC.fasta	40820.5	1	7	8	15	0.000326	0.254	YGQYEDEIVTGEVSHR	K	D	0.997	89.9	25	89.9	1881.86	2538	698071	130	145
sample Treatment	2022 5:30:55 PM;File Size: 1000722054 [Byte] (F057606)	23S rRNA m(5)U-1939 methyltransferase OS=Pediococcus pentosaceus (strain ATCC 25745 / CCUG 21536 / LMG 10740 / 183-1w) OX=278197 GN=PEPE_1366 PE=3 SV=1	Q03EG8_PEDPA	PEPE_1366	Uniprot_Pediococcus_pentosaceus_strain_ATCC.fasta	50987.4	1	8	9	17	0.00037	0.349	FGEQGYVVNQPIVPVDQFPQTPHVESVTVLER	R	-	0.997	52.7	25	52.7	3608.84	3649	127114	423	454
sample Treatment	2022 5:30:55 PM;File Size: 1000722054 [Byte] (F057606)	23S rRNA m(5)U-1939 methyltransferase OS=Pediococcus pentosaceus (strain ATCC 25745 / CCUG 21536 / LMG 10740 / 183-1w) OX=278197 GN=PEPE_1366 PE=3 SV=1	Q03EG8_PEDPA	PEPE_1366	Uniprot_Pediococcus_pentosaceus_strain_ATCC.fasta	50987.4	1	8	9	17	0.00037	0.349	GLDQSVIDATVGMKPK	K	R	0.986	39.1	25	39.1	1658.88	3053	47404.9	389	404
sample Treatment	2022 5:30:55 PM;File Size: 1000722054 [Byte] (F057606)	23S rRNA m(5)U-1939 methyltransferase OS=Pediococcus pentosaceus (strain ATCC 25745 / CCUG 21536 / LMG 10740 / 183-1w) OX=278197 GN=PEPE_1366 PE=3 SV=1	Q03EG8_PEDPA	PEPE_1366	Uniprot_Pediococcus_pentosaceus_strain_ATCC.fasta	50987.4	1	8	9	17	0.00037	0.349	IEHFPIFIADSIPGEK	K	I	0.993	44.4	25	44.4	1812.95	3634.5	130441	30	45
sample Treatment	2022 5:30:55 PM;File Size: 1000722054 [Byte] (F057606)	23S rRNA m(5)U-1939 methyltransferase OS=Pediococcus pentosaceus (strain ATCC 25745 / CCUG 21536 / LMG 10740 / 183-1w) OX=278197 GN=PEPE_1366 PE=3 SV=1	Q03EG8_PEDPA	PEPE_1366	Uniprot_Pediococcus_pentosaceus_strain_ATCC.fasta	50987.4	1	8	9	17	0.00037	0.349	INAFQNNASNTEFVVGK	K	A	0.997	102	25	102	1852.92	2865	54132.7	347	363
sample Treatment	2022 5:30:55 PM;File Size: 1000722054 [Byte] (F057606)	23S rRNA m(5)U-1939 methyltransferase OS=Pediococcus pentosaceus (strain ATCC 25745 / CCUG 21536 / LMG 10740 / 183-1w) OX=278197 GN=PEPE_1366 PE=3 SV=1	Q03EG8_PEDPA	PEPE_1366	Uniprot_Pediococcus_pentosaceus_strain_ATCC.fasta	50987.4	1	8	9	17	0.00037	0.349	NSHDLVPIEDFYIQDPVIDK	R	V	0.997	53.7	25	53.7	2357.17	3768	168983	153	172
sample Treatment	2022 5:30:55 PM;File Size: 1000722054 [Byte] (F057606)	23S rRNA m(5)U-1939 methyltransferase OS=Pediococcus pentosaceus (strain ATCC 25745 / CCUG 21536 / LMG 10740 / 183-1w) OX=278197 GN=PEPE_1366 PE=3 SV=1	Q03EG8_PEDPA	PEPE_1366	Uniprot_Pediococcus_pentosaceus_strain_ATCC.fasta	50987.4	1	8	9	17	0.00037	0.349	QTNVIMGDEDR	K	V	0.984	38	25	38	1277.58	2017	70479.8	250	260
sample Treatment	2022 5:30:55 PM;File Size: 1000722054 [Byte] (F057606)	23S rRNA m(5)U-1939 methyltransferase OS=Pediococcus pentosaceus (strain ATCC 25745 / CCUG 21536 / LMG 10740 / 183-1w) OX=278197 GN=PEPE_1366 PE=3 SV=1	Q03EG8_PEDPA	PEPE_1366	Uniprot_Pediococcus_pentosaceus_strain_ATCC.fasta	50987.4	1	8	9	17	0.00037	0.349	VLEESPDRVESNDAAYTQTGIAPLQHITYDAQLK	K	F	0.997	62.2	25	62.2	3772.87	3297.5	109659	65	98
sample Treatment	2022 5:30:55 PM;File Size: 1000722054 [Byte] (F057606)	23S rRNA m(5)U-1939 methyltransferase OS=Pediococcus pentosaceus (strain ATCC 25745 / CCUG 21536 / LMG 10740 / 183-1w) OX=278197 GN=PEPE_1366 PE=3 SV=1	Q03EG8_PEDPA	PEPE_1366	Uniprot_Pediococcus_pentosaceus_strain_ATCC.fasta	50987.4	1	8	9	17	0.00037	0.349	VVYVSCNPATLVR	R	D	0.996	47.9	25	47.9	1477.78	2859.5	139909	406	418
sample Treatment	2022 5:30:55 PM;File Size: 1000722054 [Byte] (F057606)	Nucleotide-binding protein PEPE_0450 OS=Pediococcus pentosaceus (strain ATCC 25745 / CCUG 21536 / LMG 10740 / 183-1w) OX=278197 GN=PEPE_0450 PE=3 SV=1	Y450_PEDPA	PEPE_0450	Uniprot_Pediococcus_pentosaceus_strain_ATCC.fasta	33436.2	1	2	2	3	6.52e-05	0.0746	VALVVDLR	K	S	0.989	40.2	25	40.2	884.556	2973.5	163991	57	64
sample Treatment	2022 5:30:55 PM;File Size: 1000722054 [Byte] (F057606)	Nucleotide-binding protein PEPE_0450 OS=Pediococcus pentosaceus (strain ATCC 25745 / CCUG 21536 / LMG 10740 / 183-1w) OX=278197 GN=PEPE_0450 PE=3 SV=1	Y450_PEDPA	PEPE_0450	Uniprot_Pediococcus_pentosaceus_strain_ATCC.fasta	33436.2	1	2	2	3	6.52e-05	0.0746	YGSPIDADIIMDVR	K	F	0.997	66.9	25	66.9	1564.77	3561	57017.5	178	191
sample Treatment	2022 5:30:55 PM;File Size: 1000722054 [Byte] (F057606)	ATP synthase gamma chain OS=Pediococcus pentosaceus (strain ATCC 25745 / CCUG 21536 / LMG 10740 / 183-1w) OX=278197 GN=atpG PE=3 SV=1	ATPG_PEDPA	atpG	Uniprot_Pediococcus_pentosaceus_strain_ATCC.fasta	33647.9	1	8	9	18	0.000391	0.337	AISEQDVK	M	R	0.96	32.5	25	26.4	889.463	1540	104763	2	9
sample Treatment	2022 5:30:55 PM;File Size: 1000722054 [Byte] (F057606)	ATP synthase gamma chain OS=Pediococcus pentosaceus (strain ATCC 25745 / CCUG 21536 / LMG 10740 / 183-1w) OX=278197 GN=atpG PE=3 SV=1	ATPG_PEDPA	atpG	Uniprot_Pediococcus_pentosaceus_strain_ATCC.fasta	33647.9	1	8	9	18	0.000391	0.337	FDELYVCYNHFVNR	K	L	0.993	44.6	25	44.6	1875.85	3249.5	127121	180	193
sample Treatment	2022 5:30:55 PM;File Size: 1000722054 [Byte] (F057606)	ATP synthase gamma chain OS=Pediococcus pentosaceus (strain ATCC 25745 / CCUG 21536 / LMG 10740 / 183-1w) OX=278197 GN=atpG PE=3 SV=1	ATPG_PEDPA	atpG	Uniprot_Pediococcus_pentosaceus_strain_ATCC.fasta	33647.9	1	8	9	18	0.000391	0.337	GVSDVPTFNEIR	R	E	0.993	44.2	25	44.2	1333.67	2928	370352	154	165
sample Treatment	2022 5:30:55 PM;File Size: 1000722054 [Byte] (F057606)	ATP synthase gamma chain OS=Pediococcus pentosaceus (strain ATCC 25745 / CCUG 21536 / LMG 10740 / 183-1w) OX=278197 GN=atpG PE=3 SV=1	ATPG_PEDPA	atpG	Uniprot_Pediococcus_pentosaceus_strain_ATCC.fasta	33647.9	1	8	9	18	0.000391	0.337	HGHTEGDAVILAVGGTGSDFYR	K	N	0.997	49.2	25	49.2	2259.08	3109	214119	121	142
sample Treatment	2022 5:30:55 PM;File Size: 1000722054 [Byte] (F057606)	ATP synthase gamma chain OS=Pediococcus pentosaceus (strain ATCC 25745 / CCUG 21536 / LMG 10740 / 183-1w) OX=278197 GN=atpG PE=3 SV=1	ATPG_PEDPA	atpG	Uniprot_Pediococcus_pentosaceus_strain_ATCC.fasta	33647.9	1	8	9	18	0.000391	0.337	HTVGYQVYAQK	R	V	0.997	57.8	25	57.8	1293.66	1910.5	99488.4	39	49
sample Treatment	2022 5:30:55 PM;File Size: 1000722054 [Byte] (F057606)	ATP synthase gamma chain OS=Pediococcus pentosaceus (strain ATCC 25745 / CCUG 21536 / LMG 10740 / 183-1w) OX=278197 GN=atpG PE=3 SV=1	ATPG_PEDPA	atpG	Uniprot_Pediococcus_pentosaceus_strain_ATCC.fasta	33647.9	1	8	9	18	0.000391	0.337	NHEVAYEYR	R	G	0.997	54.5	25	54.5	1180.54	1730	100145	145	153
sample Treatment	2022 5:30:55 PM;File Size: 1000722054 [Byte] (F057606)	ATP synthase gamma chain OS=Pediococcus pentosaceus (strain ATCC 25745 / CCUG 21536 / LMG 10740 / 183-1w) OX=278197 GN=atpG PE=3 SV=1	ATPG_PEDPA	atpG	Uniprot_Pediococcus_pentosaceus_strain_ATCC.fasta	33647.9	1	8	9	18	0.000391	0.337	SDQAISAADLLAQRPVK	K	K	0.997	67.5	25	67.5	1782.97	3019	344218	73	89
sample Treatment	2022 5:30:55 PM;File Size: 1000722054 [Byte] (F057606)	ATP synthase gamma chain OS=Pediococcus pentosaceus (strain ATCC 25745 / CCUG 21536 / LMG 10740 / 183-1w) OX=278197 GN=atpG PE=3 SV=1	ATPG_PEDPA	atpG	Uniprot_Pediococcus_pentosaceus_strain_ATCC.fasta	33647.9	1	8	9	18	0.000391	0.337	TGYLIITSDR	K	G	0.993	44	25	44	1138.61	2754	347100	91	100
sample Treatment	2022 5:30:55 PM;File Size: 1000722054 [Byte] (F057606)	Phosphoenolpyruvate-protein phosphotransferase OS=Pediococcus pentosaceus (strain ATCC 25745 / CCUG 21536 / LMG 10740 / 183-1w) OX=278197 GN=PEPE_0610 PE=3 SV=1	Q03GH5_PEDPA	PEPE_0610	Uniprot_Pediococcus_pentosaceus_strain_ATCC.fasta	63343.1	1	17	20	47	0.00102	0.296	AIYDDER	R	Q	0.9	40.8	25	40.8	881.4	1666.5	393336	406	412
sample Treatment	2022 5:30:55 PM;File Size: 1000722054 [Byte] (F057606)	Phosphoenolpyruvate-protein phosphotransferase OS=Pediococcus pentosaceus (strain ATCC 25745 / CCUG 21536 / LMG 10740 / 183-1w) OX=278197 GN=PEPE_0610 PE=3 SV=1	Q03GH5_PEDPA	PEPE_0610	Uniprot_Pediococcus_pentosaceus_strain_ATCC.fasta	63343.1	1	17	20	47	0.00102	0.296	AVTEAETNEDVIK	K	L	0.997	104	25	104	1418.7	2096	425665	553	565
sample Treatment	2022 5:30:55 PM;File Size: 1000722054 [Byte] (F057606)	Phosphoenolpyruvate-protein phosphotransferase OS=Pediococcus pentosaceus (strain ATCC 25745 / CCUG 21536 / LMG 10740 / 183-1w) OX=278197 GN=PEPE_0610 PE=3 SV=1	Q03GH5_PEDPA	PEPE_0610	Uniprot_Pediococcus_pentosaceus_strain_ATCC.fasta	63343.1	1	17	20	47	0.00102	0.296	AYLMVDPDLSFEK	K	K	0.997	65.4	25	65.4	1527.74	3530	283914	19	31
sample Treatment	2022 5:30:55 PM;File Size: 1000722054 [Byte] (F057606)	Phosphoenolpyruvate-protein phosphotransferase OS=Pediococcus pentosaceus (strain ATCC 25745 / CCUG 21536 / LMG 10740 / 183-1w) OX=278197 GN=PEPE_0610 PE=3 SV=1	Q03GH5_PEDPA	PEPE_0610	Uniprot_Pediococcus_pentosaceus_strain_ATCC.fasta	63343.1	1	17	20	47	0.00102	0.296	GFITDIGGR	K	T	0.993	44	25	44	935.495	2727	880856	180	188
sample Treatment	2022 5:30:55 PM;File Size: 1000722054 [Byte] (F057606)	Phosphoenolpyruvate-protein phosphotransferase OS=Pediococcus pentosaceus (strain ATCC 25745 / CCUG 21536 / LMG 10740 / 183-1w) OX=278197 GN=PEPE_0610 PE=3 SV=1	Q03GH5_PEDPA	PEPE_0610	Uniprot_Pediococcus_pentosaceus_strain_ATCC.fasta	63343.1	1	17	20	47	0.00102	0.296	GIAASDGIAIAK	K	A	0.997	68.2	25	68.2	1086.62	2412.5	1194410	7	18
sample Treatment	2022 5:30:55 PM;File Size: 1000722054 [Byte] (F057606)	Phosphoenolpyruvate-protein phosphotransferase OS=Pediococcus pentosaceus (strain ATCC 25745 / CCUG 21536 / LMG 10740 / 183-1w) OX=278197 GN=PEPE_0610 PE=3 SV=1	Q03GH5_PEDPA	PEPE_0610	Uniprot_Pediococcus_pentosaceus_strain_ATCC.fasta	63343.1	1	17	20	47	0.00102	0.296	IKNDTINAEEATK	K	E	0.997	65.9	25	65.9	1446.74	1725	421507	94	106
sample Treatment	2022 5:30:55 PM;File Size: 1000722054 [Byte] (F057606)	Phosphoenolpyruvate-protein phosphotransferase OS=Pediococcus pentosaceus (strain ATCC 25745 / CCUG 21536 / LMG 10740 / 183-1w) OX=278197 GN=PEPE_0610 PE=3 SV=1	Q03GH5_PEDPA	PEPE_0610	Uniprot_Pediococcus_pentosaceus_strain_ATCC.fasta	63343.1	1	17	20	47	0.00102	0.296	LHDALEK	R	S	0.9	33	25	33	825.447	1447	73171.9	44	50
sample Treatment	2022 5:30:55 PM;File Size: 1000722054 [Byte] (F057606)	Phosphoenolpyruvate-protein phosphotransferase OS=Pediococcus pentosaceus (strain ATCC 25745 / CCUG 21536 / LMG 10740 / 183-1w) OX=278197 GN=PEPE_0610 PE=3 SV=1	Q03GH5_PEDPA	PEPE_0610	Uniprot_Pediococcus_pentosaceus_strain_ATCC.fasta	63343.1	1	17	20	47	0.00102	0.296	LTTDDMK	K	K	0.9	35.4	25	35.4	823.387	1520	51810.5	541	547
sample Treatment	2022 5:30:55 PM;File Size: 1000722054 [Byte] (F057606)	Phosphoenolpyruvate-protein phosphotransferase OS=Pediococcus pentosaceus (strain ATCC 25745 / CCUG 21536 / LMG 10740 / 183-1w) OX=278197 GN=PEPE_0610 PE=3 SV=1	Q03GH5_PEDPA	PEPE_0610	Uniprot_Pediococcus_pentosaceus_strain_ATCC.fasta	63343.1	1	17	20	47	0.00102	0.296	LVQETVDNI	K	-	0.997	52.6	25	52.6	1030.54	2582.5	381491	566	574
sample Treatment	2022 5:30:55 PM;File Size: 1000722054 [Byte] (F057606)	Phosphoenolpyruvate-protein phosphotransferase OS=Pediococcus pentosaceus (strain ATCC 25745 / CCUG 21536 / LMG 10740 / 183-1w) OX=278197 GN=PEPE_0610 PE=3 SV=1	Q03GH5_PEDPA	PEPE_0610	Uniprot_Pediococcus_pentosaceus_strain_ATCC.fasta	63343.1	1	17	20	47	0.00102	0.296	NDTINAEEATK	K	E	0.997	59.4	25	59.4	1205.56	1687	135271	96	106
sample Treatment	2022 5:30:55 PM;File Size: 1000722054 [Byte] (F057606)	Phosphoenolpyruvate-protein phosphotransferase OS=Pediococcus pentosaceus (strain ATCC 25745 / CCUG 21536 / LMG 10740 / 183-1w) OX=278197 GN=PEPE_0610 PE=3 SV=1	Q03GH5_PEDPA	PEPE_0610	Uniprot_Pediococcus_pentosaceus_strain_ATCC.fasta	63343.1	1	17	20	47	0.00102	0.296	NITDVDAEIK	K	R	0.992	42.8	25	42.8	1117.57	2429.5	498391	33	42
sample Treatment	2022 5:30:55 PM;File Size: 1000722054 [Byte] (F057606)	Phosphoenolpyruvate-protein phosphotransferase OS=Pediococcus pentosaceus (strain ATCC 25745 / CCUG 21536 / LMG 10740 / 183-1w) OX=278197 GN=PEPE_0610 PE=3 SV=1	Q03GH5_PEDPA	PEPE_0610	Uniprot_Pediococcus_pentosaceus_strain_ATCC.fasta	63343.1	1	17	20	47	0.00102	0.296	NITDVDAEIKR	K	L	0.997	62.1	25	62.1	1273.67	2259	1005930	33	43
sample Treatment	2022 5:30:55 PM;File Size: 1000722054 [Byte] (F057606)	Phosphoenolpyruvate-protein phosphotransferase OS=Pediococcus pentosaceus (strain ATCC 25745 / CCUG 21536 / LMG 10740 / 183-1w) OX=278197 GN=PEPE_0610 PE=3 SV=1	Q03GH5_PEDPA	PEPE_0610	Uniprot_Pediococcus_pentosaceus_strain_ATCC.fasta	63343.1	1	17	20	47	0.00102	0.296	QTIDASHAEGK	K	W	0.996	48.9	25	48.9	1156.56	1256	44676.7	488	498
sample Treatment	2022 5:30:55 PM;File Size: 1000722054 [Byte] (F057606)	Phosphoenolpyruvate-protein phosphotransferase OS=Pediococcus pentosaceus (strain ATCC 25745 / CCUG 21536 / LMG 10740 / 183-1w) OX=278197 GN=PEPE_0610 PE=3 SV=1	Q03GH5_PEDPA	PEPE_0610	Uniprot_Pediococcus_pentosaceus_strain_ATCC.fasta	63343.1	1	17	20	47	0.00102	0.296	SEFLYMNASELPSEDEQFEAYKK	R	V	0.997	69.7	25	69.7	2755.24	3410	160563	299	321
sample Treatment	2022 5:30:55 PM;File Size: 1000722054 [Byte] (F057606)	Phosphoenolpyruvate-protein phosphotransferase OS=Pediococcus pentosaceus (strain ATCC 25745 / CCUG 21536 / LMG 10740 / 183-1w) OX=278197 GN=PEPE_0610 PE=3 SV=1	Q03GH5_PEDPA	PEPE_0610	Uniprot_Pediococcus_pentosaceus_strain_ATCC.fasta	63343.1	1	17	20	47	0.00102	0.296	SKEELSLIK	K	A	0.974	34.9	25	29.9	1046.61	2309.5	208132	51	59
sample Treatment	2022 5:30:55 PM;File Size: 1000722054 [Byte] (F057606)	Phosphoenolpyruvate-protein phosphotransferase OS=Pediococcus pentosaceus (strain ATCC 25745 / CCUG 21536 / LMG 10740 / 183-1w) OX=278197 GN=PEPE_0610 PE=3 SV=1	Q03GH5_PEDPA	PEPE_0610	Uniprot_Pediococcus_pentosaceus_strain_ATCC.fasta	63343.1	1	17	20	47	0.00102	0.296	TLEIPAVVGSEK	R	A	0.997	60.2	25	53	1242.69	2959	1115540	198	209
sample Treatment	2022 5:30:55 PM;File Size: 1000722054 [Byte] (F057606)	Phosphoenolpyruvate-protein phosphotransferase OS=Pediococcus pentosaceus (strain ATCC 25745 / CCUG 21536 / LMG 10740 / 183-1w) OX=278197 GN=PEPE_0610 PE=3 SV=1	Q03GH5_PEDPA	PEPE_0610	Uniprot_Pediococcus_pentosaceus_strain_ATCC.fasta	63343.1	1	17	20	47	0.00102	0.296	VSYLYQPYNPSLLR	K	L	0.997	83	25	83	1712.9	3309.5	929183	471	484
sample Treatment	2022 5:30:55 PM;File Size: 1000722054 [Byte] (F057606)	Glutamate--tRNA ligase OS=Pediococcus pentosaceus (strain ATCC 25745 / CCUG 21536 / LMG 10740 / 183-1w) OX=278197 GN=gltX PE=3 SV=1	SYE_PEDPA	gltX	Uniprot_Pediococcus_pentosaceus_strain_ATCC.fasta	56728.1	1	13	15	32	0.000696	0.279	AAGIEPVIR	K	F	0.997	56.1	25	56.1	925.547	2312.5	470177	153	161
sample Treatment	2022 5:30:55 PM;File Size: 1000722054 [Byte] (F057606)	Glutamate--tRNA ligase OS=Pediococcus pentosaceus (strain ATCC 25745 / CCUG 21536 / LMG 10740 / 183-1w) OX=278197 GN=gltX PE=3 SV=1	SYE_PEDPA	gltX	Uniprot_Pediococcus_pentosaceus_strain_ATCC.fasta	56728.1	1	13	15	32	0.000696	0.279	AYESYMTEEELAAQR	K	E	0.997	84.5	25	77.9	1790.79	2692	81347.8	106	120
sample Treatment	2022 5:30:55 PM;File Size: 1000722054 [Byte] (F057606)	Glutamate--tRNA ligase OS=Pediococcus pentosaceus (strain ATCC 25745 / CCUG 21536 / LMG 10740 / 183-1w) OX=278197 GN=gltX PE=3 SV=1	SYE_PEDPA	gltX	Uniprot_Pediococcus_pentosaceus_strain_ATCC.fasta	56728.1	1	13	15	32	0.000696	0.279	AYESYMTEEELAAQREEQK	K	A	0.994	46.8	25	46.8	2305.03	2607	131004	106	124
sample Treatment	2022 5:30:55 PM;File Size: 1000722054 [Byte] (F057606)	Glutamate--tRNA ligase OS=Pediococcus pentosaceus (strain ATCC 25745 / CCUG 21536 / LMG 10740 / 183-1w) OX=278197 GN=gltX PE=3 SV=1	SYE_PEDPA	gltX	Uniprot_Pediococcus_pentosaceus_strain_ATCC.fasta	56728.1	1	13	15	32	0.000696	0.279	EELATDDALPVLK	K	A	0.997	56.3	25	56.3	1413.75	3102	162284	407	419
sample Treatment	2022 5:30:55 PM;File Size: 1000722054 [Byte] (F057606)	Glutamate--tRNA ligase OS=Pediococcus pentosaceus (strain ATCC 25745 / CCUG 21536 / LMG 10740 / 183-1w) OX=278197 GN=gltX PE=3 SV=1	SYE_PEDPA	gltX	Uniprot_Pediococcus_pentosaceus_strain_ATCC.fasta	56728.1	1	13	15	32	0.000696	0.279	FKVPTNTTYEWDDLVK	R	G	0.993	45.5	25	45.5	1955.98	3403	259093	162	177
sample Treatment	2022 5:30:55 PM;File Size: 1000722054 [Byte] (F057606)	Glutamate--tRNA ligase OS=Pediococcus pentosaceus (strain ATCC 25745 / CCUG 21536 / LMG 10740 / 183-1w) OX=278197 GN=gltX PE=3 SV=1	SYE_PEDPA	gltX	Uniprot_Pediococcus_pentosaceus_strain_ATCC.fasta	56728.1	1	13	15	32	0.000696	0.279	GHISFESETIGGDFVIQK	K	R	0.996	51.8	25	51.8	1963.98	3245	315018	178	195
sample Treatment	2022 5:30:55 PM;File Size: 1000722054 [Byte] (F057606)	Glutamate--tRNA ligase OS=Pediococcus pentosaceus (strain ATCC 25745 / CCUG 21536 / LMG 10740 / 183-1w) OX=278197 GN=gltX PE=3 SV=1	SYE_PEDPA	gltX	Uniprot_Pediococcus_pentosaceus_strain_ATCC.fasta	56728.1	1	13	15	32	0.000696	0.279	GIYQPLIDQLVAEGK	K	A	0.993	43.5	25	43.5	1643.9	3753.5	224284	91	105
sample Treatment	2022 5:30:55 PM;File Size: 1000722054 [Byte] (F057606)	Glutamate--tRNA ligase OS=Pediococcus pentosaceus (strain ATCC 25745 / CCUG 21536 / LMG 10740 / 183-1w) OX=278197 GN=gltX PE=3 SV=1	SYE_PEDPA	gltX	Uniprot_Pediococcus_pentosaceus_strain_ATCC.fasta	56728.1	1	13	15	32	0.000696	0.279	IMHSALLQLINAGK	R	I	0.997	57.5	25	57.5	1508.86	3488	301902	344	357
sample Treatment	2022 5:30:55 PM;File Size: 1000722054 [Byte] (F057606)	Glutamate--tRNA ligase OS=Pediococcus pentosaceus (strain ATCC 25745 / CCUG 21536 / LMG 10740 / 183-1w) OX=278197 GN=gltX PE=3 SV=1	SYE_PEDPA	gltX	Uniprot_Pediococcus_pentosaceus_strain_ATCC.fasta	56728.1	1	13	15	32	0.000696	0.279	KLEWINNQYVK	K	A	0.976	35.6	25	35.6	1434.77	2786.5	469826	327	337
sample Treatment	2022 5:30:55 PM;File Size: 1000722054 [Byte] (F057606)	Glutamate--tRNA ligase OS=Pediococcus pentosaceus (strain ATCC 25745 / CCUG 21536 / LMG 10740 / 183-1w) OX=278197 GN=gltX PE=3 SV=1	SYE_PEDPA	gltX	Uniprot_Pediococcus_pentosaceus_strain_ATCC.fasta	56728.1	1	13	15	32	0.000696	0.279	LEWINNQYVK	K	A	0.991	41.7	25	41.7	1306.68	2958	134900	328	337
sample Treatment	2022 5:30:55 PM;File Size: 1000722054 [Byte] (F057606)	Glutamate--tRNA ligase OS=Pediococcus pentosaceus (strain ATCC 25745 / CCUG 21536 / LMG 10740 / 183-1w) OX=278197 GN=gltX PE=3 SV=1	SYE_PEDPA	gltX	Uniprot_Pediococcus_pentosaceus_strain_ATCC.fasta	56728.1	1	13	15	32	0.000696	0.279	SPAAFDAK	K	K	0.99	45.5	25	45.5	806.404	1639.5	278978	319	326
sample Treatment	2022 5:30:55 PM;File Size: 1000722054 [Byte] (F057606)	Glutamate--tRNA ligase OS=Pediococcus pentosaceus (strain ATCC 25745 / CCUG 21536 / LMG 10740 / 183-1w) OX=278197 GN=gltX PE=3 SV=1	SYE_PEDPA	gltX	Uniprot_Pediococcus_pentosaceus_strain_ATCC.fasta	56728.1	1	13	15	32	0.000696	0.279	VPTNTTYEWDDLVK	K	G	0.997	79.6	25	79.6	1680.81	3255.5	181304	164	177
sample Treatment	2022 5:30:55 PM;File Size: 1000722054 [Byte] (F057606)	Glutamate--tRNA ligase OS=Pediococcus pentosaceus (strain ATCC 25745 / CCUG 21536 / LMG 10740 / 183-1w) OX=278197 GN=gltX PE=3 SV=1	SYE_PEDPA	gltX	Uniprot_Pediococcus_pentosaceus_strain_ATCC.fasta	56728.1	1	13	15	32	0.000696	0.279	YAPSPTGHLHIGNAR	R	T	0.997	63.3	25	63.3	1590.81	2119.5	1254130	10	24
sample Treatment	2022 5:30:55 PM;File Size: 1000722054 [Byte] (F057606)	Predicted glycosyl transferase OS=Pediococcus pentosaceus (strain ATCC 25745 / CCUG 21536 / LMG 10740 / 183-1w) OX=278197 GN=PEPE_0323 PE=4 SV=1	Q03HA3_PEDPA	PEPE_0323	Uniprot_Pediococcus_pentosaceus_strain_ATCC.fasta	76365.8	0.995	1	1	1	2.17e-05	0.0222	SLVTVYVNDTTLGSK	R	K	0.993	43.9	25	43.9	1596.85	3159	53053	359	373
sample Treatment	2022 5:30:55 PM;File Size: 1000722054 [Byte] (F057606)	50S ribosomal protein L31 type B OS=Pediococcus pentosaceus (strain ATCC 25745 / CCUG 21536 / LMG 10740 / 183-1w) OX=278197 GN=rpmE2 PE=3 SV=1	RL31B_PEDPA	rpmE2	Uniprot_Pediococcus_pentosaceus_strain_ATCC.fasta	9070.3	1	7	10	23	0.0005	0.852	FLSGSTVGSAETIK	K	W	0.997	92.5	25	92.5	1396.73	2514.5	1022440	23	36
sample Treatment	2022 5:30:55 PM;File Size: 1000722054 [Byte] (F057606)	50S ribosomal protein L31 type B OS=Pediococcus pentosaceus (strain ATCC 25745 / CCUG 21536 / LMG 10740 / 183-1w) OX=278197 GN=rpmE2 PE=3 SV=1	RL31B_PEDPA	rpmE2	Uniprot_Pediococcus_pentosaceus_strain_ATCC.fasta	9070.3	1	7	10	23	0.0005	0.852	FLSGSTVGSAETIKWEDGNEYPLIR	K	V	0.997	66.2	25	66.2	2769.37	3496.5	266509	23	47
sample Treatment	2022 5:30:55 PM;File Size: 1000722054 [Byte] (F057606)	50S ribosomal protein L31 type B OS=Pediococcus pentosaceus (strain ATCC 25745 / CCUG 21536 / LMG 10740 / 183-1w) OX=278197 GN=rpmE2 PE=3 SV=1	RL31B_PEDPA	rpmE2	Uniprot_Pediococcus_pentosaceus_strain_ATCC.fasta	9070.3	1	7	10	23	0.0005	0.852	FQQADGTVAK	K	F	0.982	37.2	25	37.2	1064.54	1506.5	1671000	64	73
sample Treatment	2022 5:30:55 PM;File Size: 1000722054 [Byte] (F057606)	50S ribosomal protein L31 type B OS=Pediococcus pentosaceus (strain ATCC 25745 / CCUG 21536 / LMG 10740 / 183-1w) OX=278197 GN=rpmE2 PE=3 SV=1	RL31B_PEDPA	rpmE2	Uniprot_Pediococcus_pentosaceus_strain_ATCC.fasta	9070.3	1	7	10	23	0.0005	0.852	GIHPDYHPVVFQDSATGFK	K	F	0.997	41.5	25	41.5	2115.03	2857	1299160	4	22
sample Treatment	2022 5:30:55 PM;File Size: 1000722054 [Byte] (F057606)	50S ribosomal protein L31 type B OS=Pediococcus pentosaceus (strain ATCC 25745 / CCUG 21536 / LMG 10740 / 183-1w) OX=278197 GN=rpmE2 PE=3 SV=1	RL31B_PEDPA	rpmE2	Uniprot_Pediococcus_pentosaceus_strain_ATCC.fasta	9070.3	1	7	10	23	0.0005	0.852	KGIHPDYHPVVFQDSATGFK	K	F	0.997	61.7	25	61.7	2243.12	2731	1072970	3	22
sample Treatment	2022 5:30:55 PM;File Size: 1000722054 [Byte] (F057606)	50S ribosomal protein L31 type B OS=Pediococcus pentosaceus (strain ATCC 25745 / CCUG 21536 / LMG 10740 / 183-1w) OX=278197 GN=rpmE2 PE=3 SV=1	RL31B_PEDPA	rpmE2	Uniprot_Pediococcus_pentosaceus_strain_ATCC.fasta	9070.3	1	7	10	23	0.0005	0.852	VEITSDSHPFYTGR	R	Q	0.997	83.5	25	83.5	1608.77	2455	3098460	48	61
sample Treatment	2022 5:30:55 PM;File Size: 1000722054 [Byte] (F057606)	50S ribosomal protein L31 type B OS=Pediococcus pentosaceus (strain ATCC 25745 / CCUG 21536 / LMG 10740 / 183-1w) OX=278197 GN=rpmE2 PE=3 SV=1	RL31B_PEDPA	rpmE2	Uniprot_Pediococcus_pentosaceus_strain_ATCC.fasta	9070.3	1	7	10	23	0.0005	0.852	WEDGNEYPLIR	K	V	0.997	65.6	25	65.6	1391.66	2960.5	1167770	37	47
sample Treatment	2022 5:30:55 PM;File Size: 1000722054 [Byte] (F057606)	N-acetylglucosamine 6-phosphate deacetylase OS=Pediococcus pentosaceus (strain ATCC 25745 / CCUG 21536 / LMG 10740 / 183-1w) OX=278197 GN=PEPE_1528 PE=3 SV=1	Q03E14_PEDPA	PEPE_1528	Uniprot_Pediococcus_pentosaceus_strain_ATCC.fasta	41785.4	1	8	9	16	0.000348	0.274	AQGDDQVFYAGEK	K	I	0.987	39.4	25	39.4	1427.64	2232	135338	39	51
sample Treatment	2022 5:30:55 PM;File Size: 1000722054 [Byte] (F057606)	N-acetylglucosamine 6-phosphate deacetylase OS=Pediococcus pentosaceus (strain ATCC 25745 / CCUG 21536 / LMG 10740 / 183-1w) OX=278197 GN=PEPE_1528 PE=3 SV=1	Q03E14_PEDPA	PEPE_1528	Uniprot_Pediococcus_pentosaceus_strain_ATCC.fasta	41785.4	1	8	9	16	0.000348	0.274	FFNCGIAEAVQMSSVNQAR	R	E	0.997	62.2	25	62.2	2128.99	3396.5	163456	321	339
sample Treatment	2022 5:30:55 PM;File Size: 1000722054 [Byte] (F057606)	N-acetylglucosamine 6-phosphate deacetylase OS=Pediococcus pentosaceus (strain ATCC 25745 / CCUG 21536 / LMG 10740 / 183-1w) OX=278197 GN=PEPE_1528 PE=3 SV=1	Q03E14_PEDPA	PEPE_1528	Uniprot_Pediococcus_pentosaceus_strain_ATCC.fasta	41785.4	1	8	9	16	0.000348	0.274	GFAEGESELGGQK	K	V	0.995	46.1	25	46.1	1308.61	2148	117925	277	289
sample Treatment	2022 5:30:55 PM;File Size: 1000722054 [Byte] (F057606)	N-acetylglucosamine 6-phosphate deacetylase OS=Pediococcus pentosaceus (strain ATCC 25745 / CCUG 21536 / LMG 10740 / 183-1w) OX=278197 GN=PEPE_1528 PE=3 SV=1	Q03E14_PEDPA	PEPE_1528	Uniprot_Pediococcus_pentosaceus_strain_ATCC.fasta	41785.4	1	8	9	16	0.000348	0.274	GSDAFEAYCLDHGIVPSVGHSDATR	K	A	0.994	33.2	25	33.2	2661.2	3078	395619	176	200
sample Treatment	2022 5:30:55 PM;File Size: 1000722054 [Byte] (F057606)	N-acetylglucosamine 6-phosphate deacetylase OS=Pediococcus pentosaceus (strain ATCC 25745 / CCUG 21536 / LMG 10740 / 183-1w) OX=278197 GN=PEPE_1528 PE=3 SV=1	Q03E14_PEDPA	PEPE_1528	Uniprot_Pediococcus_pentosaceus_strain_ATCC.fasta	41785.4	1	8	9	16	0.000348	0.274	HATIYTGLEK	R	I	0.988	39.7	25	39.7	1132.6	2090	265143	7	16
sample Treatment	2022 5:30:55 PM;File Size: 1000722054 [Byte] (F057606)	N-acetylglucosamine 6-phosphate deacetylase OS=Pediococcus pentosaceus (strain ATCC 25745 / CCUG 21536 / LMG 10740 / 183-1w) OX=278197 GN=PEPE_1528 PE=3 SV=1	Q03E14_PEDPA	PEPE_1528	Uniprot_Pediococcus_pentosaceus_strain_ATCC.fasta	41785.4	1	8	9	16	0.000348	0.274	IDLVTDSMR	R	A	0.992	43.3	25	35.8	1049.53	2641	187770	266	274
sample Treatment	2022 5:30:55 PM;File Size: 1000722054 [Byte] (F057606)	N-acetylglucosamine 6-phosphate deacetylase OS=Pediococcus pentosaceus (strain ATCC 25745 / CCUG 21536 / LMG 10740 / 183-1w) OX=278197 GN=PEPE_1528 PE=3 SV=1	Q03E14_PEDPA	PEPE_1528	Uniprot_Pediococcus_pentosaceus_strain_ATCC.fasta	41785.4	1	8	9	16	0.000348	0.274	IEDGYIR	K	F	0.9	34.7	25	29.2	865.442	1965	181663	17	23
sample Treatment	2022 5:30:55 PM;File Size: 1000722054 [Byte] (F057606)	N-acetylglucosamine 6-phosphate deacetylase OS=Pediococcus pentosaceus (strain ATCC 25745 / CCUG 21536 / LMG 10740 / 183-1w) OX=278197 GN=PEPE_1528 PE=3 SV=1	Q03E14_PEDPA	PEPE_1528	Uniprot_Pediococcus_pentosaceus_strain_ATCC.fasta	41785.4	1	8	9	16	0.000348	0.274	LETYSYGK	K	K	0.97	34.2	25	34.2	960.467	1863	163080	367	374
sample Treatment	2022 5:30:55 PM;File Size: 1000722054 [Byte] (F057606)	DNA-entry nuclease OS=Pediococcus pentosaceus (strain ATCC 25745 / CCUG 21536 / LMG 10740 / 183-1w) OX=278197 GN=PEPE_0663 PE=4 SV=1	Q03GE7_PEDPA	PEPE_0663	Uniprot_Pediococcus_pentosaceus_strain_ATCC.fasta	30446.6	0.999	2	2	3	6.52e-05	0.0852	TSQTWNPTGWHQK	R	R	0.912	28.8	25	28.8	1570.74	2459	58468.1	121	133
sample Treatment	2022 5:30:55 PM;File Size: 1000722054 [Byte] (F057606)	DNA-entry nuclease OS=Pediococcus pentosaceus (strain ATCC 25745 / CCUG 21536 / LMG 10740 / 183-1w) OX=278197 GN=PEPE_0663 PE=4 SV=1	Q03GE7_PEDPA	PEPE_0663	Uniprot_Pediococcus_pentosaceus_strain_ATCC.fasta	30446.6	0.999	2	2	3	6.52e-05	0.0852	TTQATGYLSR	R	V	0.997	91.8	25	91.8	1097.56	1921	191898	102	111
sample Treatment	2022 5:30:55 PM;File Size: 1000722054 [Byte] (F057606)	Phosphoglycerate kinase OS=Pediococcus pentosaceus (strain ATCC 25745 / CCUG 21536 / LMG 10740 / 183-1w) OX=278197 GN=pgk PE=3 SV=1	PGK_PEDPA	pgk	Uniprot_Pediococcus_pentosaceus_strain_ATCC.fasta	42548.7	1	29	45	143	0.00311	0.795	AHASNVGVAEAMK	R	A	0.997	77	25	77	1284.64	1843	1563940	157	169
sample Treatment	2022 5:30:55 PM;File Size: 1000722054 [Byte] (F057606)	Phosphoglycerate kinase OS=Pediococcus pentosaceus (strain ATCC 25745 / CCUG 21536 / LMG 10740 / 183-1w) OX=278197 GN=pgk PE=3 SV=1	PGK_PEDPA	pgk	Uniprot_Pediococcus_pentosaceus_strain_ATCC.fasta	42548.7	1	29	45	143	0.00311	0.795	AILFSHLGR	K	I	0.997	59.5	25	59.5	1013.59	2783	929015	54	62
sample Treatment	2022 5:30:55 PM;File Size: 1000722054 [Byte] (F057606)	Phosphoglycerate kinase OS=Pediococcus pentosaceus (strain ATCC 25745 / CCUG 21536 / LMG 10740 / 183-1w) OX=278197 GN=pgk PE=3 SV=1	PGK_PEDPA	pgk	Uniprot_Pediococcus_pentosaceus_strain_ATCC.fasta	42548.7	1	29	45	143	0.00311	0.795	ELPGIAAISNK	K	-	0.997	59.9	25	59.9	1112.63	2840	3945780	390	400
sample Treatment	2022 5:30:55 PM;File Size: 1000722054 [Byte] (F057606)	Phosphoglycerate kinase OS=Pediococcus pentosaceus (strain ATCC 25745 / CCUG 21536 / LMG 10740 / 183-1w) OX=278197 GN=pgk PE=3 SV=1	PGK_PEDPA	pgk	Uniprot_Pediococcus_pentosaceus_strain_ATCC.fasta	42548.7	1	29	45	143	0.00311	0.795	ELTLRPVAQR	K	L	0.945	30.9	25	30.9	1182.7	2208	273969	71	80
sample Treatment	2022 5:30:55 PM;File Size: 1000722054 [Byte] (F057606)	Phosphoglycerate kinase OS=Pediococcus pentosaceus (strain ATCC 25745 / CCUG 21536 / LMG 10740 / 183-1w) OX=278197 GN=pgk PE=3 SV=1	PGK_PEDPA	pgk	Uniprot_Pediococcus_pentosaceus_strain_ATCC.fasta	42548.7	1	29	45	143	0.00311	0.795	FDNDVPNK	K	V	0.99	44.9	25	44.9	948.442	1581	1144830	279	286
sample Treatment	2022 5:30:55 PM;File Size: 1000722054 [Byte] (F057606)	Phosphoglycerate kinase OS=Pediococcus pentosaceus (strain ATCC 25745 / CCUG 21536 / LMG 10740 / 183-1w) OX=278197 GN=pgk PE=3 SV=1	PGK_PEDPA	pgk	Uniprot_Pediococcus_pentosaceus_strain_ATCC.fasta	42548.7	1	29	45	143	0.00311	0.795	FDNDVPNKVVEGDIPDGYMALDIGPK	K	S	0.997	78.1	25	78.1	2818.36	3549	455200	279	304
sample Treatment	2022 5:30:55 PM;File Size: 1000722054 [Byte] (F057606)	Phosphoglycerate kinase OS=Pediococcus pentosaceus (strain ATCC 25745 / CCUG 21536 / LMG 10740 / 183-1w) OX=278197 GN=pgk PE=3 SV=1	PGK_PEDPA	pgk	Uniprot_Pediococcus_pentosaceus_strain_ATCC.fasta	42548.7	1	29	45	143	0.00311	0.795	FEDLDGK	R	K	0.9	38.2	25	38.2	823.383	1864	613852	120	126
sample Treatment	2022 5:30:55 PM;File Size: 1000722054 [Byte] (F057606)	Phosphoglycerate kinase OS=Pediococcus pentosaceus (strain ATCC 25745 / CCUG 21536 / LMG 10740 / 183-1w) OX=278197 GN=pgk PE=3 SV=1	PGK_PEDPA	pgk	Uniprot_Pediococcus_pentosaceus_strain_ATCC.fasta	42548.7	1	29	45	143	0.00311	0.795	FEDLDGKK	R	E	0.99	42	25	42	951.478	1624	127181	120	127
sample Treatment	2022 5:30:55 PM;File Size: 1000722054 [Byte] (F057606)	Phosphoglycerate kinase OS=Pediococcus pentosaceus (strain ATCC 25745 / CCUG 21536 / LMG 10740 / 183-1w) OX=278197 GN=pgk PE=3 SV=1	PGK_PEDPA	pgk	Uniprot_Pediococcus_pentosaceus_strain_ATCC.fasta	42548.7	1	29	45	143	0.00311	0.795	FLGEAVDEPK	K	H	0.997	66.5	25	66.5	1104.56	2386	4044030	187	196
sample Treatment	2022 5:30:55 PM;File Size: 1000722054 [Byte] (F057606)	Phosphoglycerate kinase OS=Pediococcus pentosaceus (strain ATCC 25745 / CCUG 21536 / LMG 10740 / 183-1w) OX=278197 GN=pgk PE=3 SV=1	PGK_PEDPA	pgk	Uniprot_Pediococcus_pentosaceus_strain_ATCC.fasta	42548.7	1	29	45	143	0.00311	0.795	FLGEAVDEPKHPFVAILGGAK	K	V	0.953	31.8	25	31.8	2195.19	3348	72126.4	187	207
sample Treatment	2022 5:30:55 PM;File Size: 1000722054 [Byte] (F057606)	Phosphoglycerate kinase OS=Pediococcus pentosaceus (strain ATCC 25745 / CCUG 21536 / LMG 10740 / 183-1w) OX=278197 GN=pgk PE=3 SV=1	PGK_PEDPA	pgk	Uniprot_Pediococcus_pentosaceus_strain_ATCC.fasta	42548.7	1	29	45	143	0.00311	0.795	FLGTLSDATTIVGGGDSTAAVK	K	Q	0.997	126	25	126	2081.08	3356	2114740	343	364
sample Treatment	2022 5:30:55 PM;File Size: 1000722054 [Byte] (F057606)	Phosphoglycerate kinase OS=Pediococcus pentosaceus (strain ATCC 25745 / CCUG 21536 / LMG 10740 / 183-1w) OX=278197 GN=pgk PE=3 SV=1	PGK_PEDPA	pgk	Uniprot_Pediococcus_pentosaceus_strain_ATCC.fasta	42548.7	1	29	45	143	0.00311	0.795	GAQLEDAVNGMNDGDVLLFENTR	R	F	0.997	86.3	25	86.3	2478.16	3691.5	804247	97	119
sample Treatment	2022 5:30:55 PM;File Size: 1000722054 [Byte] (F057606)	Phosphoglycerate kinase OS=Pediococcus pentosaceus (strain ATCC 25745 / CCUG 21536 / LMG 10740 / 183-1w) OX=278197 GN=pgk PE=3 SV=1	PGK_PEDPA	pgk	Uniprot_Pediococcus_pentosaceus_strain_ATCC.fasta	42548.7	1	29	45	143	0.00311	0.795	GMSIGNSLVEADK	K	I	0.997	81.4	25	81.4	1320.65	2523	276881	240	252
sample Treatment	2022 5:30:55 PM;File Size: 1000722054 [Byte] (F057606)	Phosphoglycerate kinase OS=Pediococcus pentosaceus (strain ATCC 25745 / CCUG 21536 / LMG 10740 / 183-1w) OX=278197 GN=pgk PE=3 SV=1	PGK_PEDPA	pgk	Uniprot_Pediococcus_pentosaceus_strain_ATCC.fasta	42548.7	1	29	45	143	0.00311	0.795	GMSIGNSLVEADKIDVAK	K	E	0.997	84.4	25	84.4	1846.96	3099	1281300	240	257
sample Treatment	2022 5:30:55 PM;File Size: 1000722054 [Byte] (F057606)	Phosphoglycerate kinase OS=Pediococcus pentosaceus (strain ATCC 25745 / CCUG 21536 / LMG 10740 / 183-1w) OX=278197 GN=pgk PE=3 SV=1	PGK_PEDPA	pgk	Uniprot_Pediococcus_pentosaceus_strain_ATCC.fasta	42548.7	1	29	45	143	0.00311	0.795	HPFVAILGGAK	K	V	0.997	64	25	64	1109.65	2799.5	3283180	197	207
sample Treatment	2022 5:30:55 PM;File Size: 1000722054 [Byte] (F057606)	Phosphoglycerate kinase OS=Pediococcus pentosaceus (strain ATCC 25745 / CCUG 21536 / LMG 10740 / 183-1w) OX=278197 GN=pgk PE=3 SV=1	PGK_PEDPA	pgk	Uniprot_Pediococcus_pentosaceus_strain_ATCC.fasta	42548.7	1	29	45	143	0.00311	0.795	IGVIDHLLNK	K	A	0.997	57.5	25	57.5	1121.67	2973	1755450	212	221
sample Treatment	2022 5:30:55 PM;File Size: 1000722054 [Byte] (F057606)	Phosphoglycerate kinase OS=Pediococcus pentosaceus (strain ATCC 25745 / CCUG 21536 / LMG 10740 / 183-1w) OX=278197 GN=pgk PE=3 SV=1	PGK_PEDPA	pgk	Uniprot_Pediococcus_pentosaceus_strain_ATCC.fasta	42548.7	1	29	45	143	0.00311	0.795	IVLPSDSIVAEK	K	F	0.997	66.4	25	58.4	1270.73	2873	3528400	267	278
sample Treatment	2022 5:30:55 PM;File Size: 1000722054 [Byte] (F057606)	Phosphoglycerate kinase OS=Pediococcus pentosaceus (strain ATCC 25745 / CCUG 21536 / LMG 10740 / 183-1w) OX=278197 GN=pgk PE=3 SV=1	PGK_PEDPA	pgk	Uniprot_Pediococcus_pentosaceus_strain_ATCC.fasta	42548.7	1	29	45	143	0.00311	0.795	LSDLLGKPVTFVPVTR	R	G	0.997	70	25	70	1742.02	3379.5	5628520	81	96
sample Treatment	2022 5:30:55 PM;File Size: 1000722054 [Byte] (F057606)	Phosphoglycerate kinase OS=Pediococcus pentosaceus (strain ATCC 25745 / CCUG 21536 / LMG 10740 / 183-1w) OX=278197 GN=pgk PE=3 SV=1	PGK_PEDPA	pgk	Uniprot_Pediococcus_pentosaceus_strain_ATCC.fasta	42548.7	1	29	45	143	0.00311	0.795	LTVSDLDVK	K	N	0.996	48.2	25	48.2	989.552	2655	2990610	4	12
sample Treatment	2022 5:30:55 PM;File Size: 1000722054 [Byte] (F057606)	Phosphoglycerate kinase OS=Pediococcus pentosaceus (strain ATCC 25745 / CCUG 21536 / LMG 10740 / 183-1w) OX=278197 GN=pgk PE=3 SV=1	PGK_PEDPA	pgk	Uniprot_Pediococcus_pentosaceus_strain_ATCC.fasta	42548.7	1	29	45	143	0.00311	0.795	NDPELGK	K	Y	0.899	28	25	28	772.384	1282	159432	131	137
sample Treatment	2022 5:30:55 PM;File Size: 1000722054 [Byte] (F057606)	Phosphoglycerate kinase OS=Pediococcus pentosaceus (strain ATCC 25745 / CCUG 21536 / LMG 10740 / 183-1w) OX=278197 GN=pgk PE=3 SV=1	PGK_PEDPA	pgk	Uniprot_Pediococcus_pentosaceus_strain_ATCC.fasta	42548.7	1	29	45	143	0.00311	0.795	NGVIGDDNR	K	V	0.996	49.7	25	49.7	959.454	1439	324554	28	36
sample Treatment	2022 5:30:55 PM;File Size: 1000722054 [Byte] (F057606)	Phosphoglycerate kinase OS=Pediococcus pentosaceus (strain ATCC 25745 / CCUG 21536 / LMG 10740 / 183-1w) OX=278197 GN=pgk PE=3 SV=1	PGK_PEDPA	pgk	Uniprot_Pediococcus_pentosaceus_strain_ATCC.fasta	42548.7	1	29	45	143	0.00311	0.795	QLGVGDQLTHISTGGGASLEYLEGK	K	E	0.997	83.1	25	83.1	2530.28	3385	1275540	365	389
sample Treatment	2022 5:30:55 PM;File Size: 1000722054 [Byte] (F057606)	Phosphoglycerate kinase OS=Pediococcus pentosaceus (strain ATCC 25745 / CCUG 21536 / LMG 10740 / 183-1w) OX=278197 GN=pgk PE=3 SV=1	PGK_PEDPA	pgk	Uniprot_Pediococcus_pentosaceus_strain_ATCC.fasta	42548.7	1	29	45	143	0.00311	0.795	QVAAGFLMEK	K	E	0.997	64.2	25	64.2	1093.57	2831	1259090	174	183
sample Treatment	2022 5:30:55 PM;File Size: 1000722054 [Byte] (F057606)	Phosphoglycerate kinase OS=Pediococcus pentosaceus (strain ATCC 25745 / CCUG 21536 / LMG 10740 / 183-1w) OX=278197 GN=pgk PE=3 SV=1	PGK_PEDPA	pgk	Uniprot_Pediococcus_pentosaceus_strain_ATCC.fasta	42548.7	1	29	45	143	0.00311	0.795	VDFNVPVK	R	N	0.99	42.2	25	42.2	917.509	2617	2036990	20	27
sample Treatment	2022 5:30:55 PM;File Size: 1000722054 [Byte] (F057606)	Phosphoglycerate kinase OS=Pediococcus pentosaceus (strain ATCC 25745 / CCUG 21536 / LMG 10740 / 183-1w) OX=278197 GN=pgk PE=3 SV=1	PGK_PEDPA	pgk	Uniprot_Pediococcus_pentosaceus_strain_ATCC.fasta	42548.7	1	29	45	143	0.00311	0.795	VIIGGGMTYTFYAAK	K	G	0.993	44.1	25	44.1	1591.82	3348	71351	225	239
sample Treatment	2022 5:30:55 PM;File Size: 1000722054 [Byte] (F057606)	Phosphoglycerate kinase OS=Pediococcus pentosaceus (strain ATCC 25745 / CCUG 21536 / LMG 10740 / 183-1w) OX=278197 GN=pgk PE=3 SV=1	PGK_PEDPA	pgk	Uniprot_Pediococcus_pentosaceus_strain_ATCC.fasta	42548.7	1	29	45	143	0.00311	0.795	VVAALPTIK	R	Y	0.997	60.2	25	60.2	911.592	2694	4498700	37	45
sample Treatment	2022 5:30:55 PM;File Size: 1000722054 [Byte] (F057606)	Phosphoglycerate kinase OS=Pediococcus pentosaceus (strain ATCC 25745 / CCUG 21536 / LMG 10740 / 183-1w) OX=278197 GN=pgk PE=3 SV=1	PGK_PEDPA	pgk	Uniprot_Pediococcus_pentosaceus_strain_ATCC.fasta	42548.7	1	29	45	143	0.00311	0.795	VVEGDIPDGYMALDIGPK	K	S	0.997	101	25	101	1888.94	3460	1032800	287	304
sample Treatment	2022 5:30:55 PM;File Size: 1000722054 [Byte] (F057606)	Phosphoglycerate kinase OS=Pediococcus pentosaceus (strain ATCC 25745 / CCUG 21536 / LMG 10740 / 183-1w) OX=278197 GN=pgk PE=3 SV=1	PGK_PEDPA	pgk	Uniprot_Pediococcus_pentosaceus_strain_ATCC.fasta	42548.7	1	29	45	143	0.00311	0.795	YIIENGGK	K	A	0.976	35.4	25	25.2	893.473	1780.5	407071	46	53
sample Treatment	2022 5:30:55 PM;File Size: 1000722054 [Byte] (F057606)	Phosphoglycerate kinase OS=Pediococcus pentosaceus (strain ATCC 25745 / CCUG 21536 / LMG 10740 / 183-1w) OX=278197 GN=pgk PE=3 SV=1	PGK_PEDPA	pgk	Uniprot_Pediococcus_pentosaceus_strain_ATCC.fasta	42548.7	1	29	45	143	0.00311	0.795	YWASLGDMFVNDAFGTAHR	K	A	0.997	87	25	87	2173.98	3818	606546	138	156
sample Treatment	2022 5:30:55 PM;File Size: 1000722054 [Byte] (F057606)	Cell shape-determining protein MreC OS=Pediococcus pentosaceus (strain ATCC 25745 / CCUG 21536 / LMG 10740 / 183-1w) OX=278197 GN=PEPE_1288 PE=3 SV=1	Q03EP3_PEDPA	PEPE_1288	Uniprot_Pediococcus_pentosaceus_strain_ATCC.fasta	30342.7	0.924	1	1	2	4.35e-05	0.0569	VGTPVTTSGLGGVTPK	K	G	0.996	48	25	48	1470.82	2514.5	84904.3	225	240
sample Treatment	2022 5:30:55 PM;File Size: 1000722054 [Byte] (F057606)	Phosphate acyltransferase OS=Pediococcus pentosaceus (strain ATCC 25745 / CCUG 21536 / LMG 10740 / 183-1w) OX=278197 GN=plsX PE=3 SV=1	PLSX_PEDPA	plsX	Uniprot_Pediococcus_pentosaceus_strain_ATCC.fasta	37597.8	1	9	10	21	0.000457	0.354	EAYQLLK	K	N	0.9	36.8	25	25.3	864.483	2389.5	111205	192	198
sample Treatment	2022 5:30:55 PM;File Size: 1000722054 [Byte] (F057606)	Phosphate acyltransferase OS=Pediococcus pentosaceus (strain ATCC 25745 / CCUG 21536 / LMG 10740 / 183-1w) OX=278197 GN=plsX PE=3 SV=1	PLSX_PEDPA	plsX	Uniprot_Pediococcus_pentosaceus_strain_ATCC.fasta	37597.8	1	9	10	21	0.000457	0.354	GENDNFTMLDVGANAESK	K	A	0.997	67.1	25	67.1	1911.84	3058.5	56360.2	131	148
sample Treatment	2022 5:30:55 PM;File Size: 1000722054 [Byte] (F057606)	Phosphate acyltransferase OS=Pediococcus pentosaceus (strain ATCC 25745 / CCUG 21536 / LMG 10740 / 183-1w) OX=278197 GN=plsX PE=3 SV=1	PLSX_PEDPA	plsX	Uniprot_Pediococcus_pentosaceus_strain_ATCC.fasta	37597.8	1	9	10	21	0.000457	0.354	IAVDAMGGDNAPEEIVK	K	G	0.997	84.2	25	84.2	1728.85	2817	171649	3	19
sample Treatment	2022 5:30:55 PM;File Size: 1000722054 [Byte] (F057606)	Phosphate acyltransferase OS=Pediococcus pentosaceus (strain ATCC 25745 / CCUG 21536 / LMG 10740 / 183-1w) OX=278197 GN=plsX PE=3 SV=1	PLSX_PEDPA	plsX	Uniprot_Pediococcus_pentosaceus_strain_ATCC.fasta	37597.8	1	9	10	21	0.000457	0.354	KALPDVEFILYGK	R	K	0.996	49.7	25	49.7	1492.84	3577	163501	26	38
sample Treatment	2022 5:30:55 PM;File Size: 1000722054 [Byte] (F057606)	Phosphate acyltransferase OS=Pediococcus pentosaceus (strain ATCC 25745 / CCUG 21536 / LMG 10740 / 183-1w) OX=278197 GN=plsX PE=3 SV=1	PLSX_PEDPA	plsX	Uniprot_Pediococcus_pentosaceus_strain_ATCC.fasta	37597.8	1	9	10	21	0.000457	0.354	NALVQVHEIVDSK	K	L	0.984	38.3	25	38.3	1451.79	2770.5	380985	307	319
sample Treatment	2022 5:30:55 PM;File Size: 1000722054 [Byte] (F057606)	Phosphate acyltransferase OS=Pediococcus pentosaceus (strain ATCC 25745 / CCUG 21536 / LMG 10740 / 183-1w) OX=278197 GN=plsX PE=3 SV=1	PLSX_PEDPA	plsX	Uniprot_Pediococcus_pentosaceus_strain_ATCC.fasta	37597.8	1	9	10	21	0.000457	0.354	NDSSLNFVGNIESR	K	E	0.997	52.2	25	52.2	1551.74	3041	158308	199	212
sample Treatment	2022 5:30:55 PM;File Size: 1000722054 [Byte] (F057606)	Phosphate acyltransferase OS=Pediococcus pentosaceus (strain ATCC 25745 / CCUG 21536 / LMG 10740 / 183-1w) OX=278197 GN=plsX PE=3 SV=1	PLSX_PEDPA	plsX	Uniprot_Pediococcus_pentosaceus_strain_ATCC.fasta	37597.8	1	9	10	21	0.000457	0.354	NIEGTALSMLK	K	L	0.997	55	25	55	1176.63	3410	234634	235	245
sample Treatment	2022 5:30:55 PM;File Size: 1000722054 [Byte] (F057606)	Phosphate acyltransferase OS=Pediococcus pentosaceus (strain ATCC 25745 / CCUG 21536 / LMG 10740 / 183-1w) OX=278197 GN=plsX PE=3 SV=1	PLSX_PEDPA	plsX	Uniprot_Pediococcus_pentosaceus_strain_ATCC.fasta	37597.8	1	9	10	21	0.000457	0.354	NLHDFAILGNFYGTNVMHVTNPR	K	I	0.997	78.5	25	78.5	2630.29	3781.5	167087	151	173
sample Treatment	2022 5:30:55 PM;File Size: 1000722054 [Byte] (F057606)	Phosphate acyltransferase OS=Pediococcus pentosaceus (strain ATCC 25745 / CCUG 21536 / LMG 10740 / 183-1w) OX=278197 GN=plsX PE=3 SV=1	PLSX_PEDPA	plsX	Uniprot_Pediococcus_pentosaceus_strain_ATCC.fasta	37597.8	1	9	10	21	0.000457	0.354	SAFSQIK	K	D	0.9	28.2	25	28.2	780.425	2022	77769.6	267	273
sample Treatment	2022 5:30:55 PM;File Size: 1000722054 [Byte] (F057606)	LysM domain-containing protein OS=Pediococcus pentosaceus (strain ATCC 25745 / CCUG 21536 / LMG 10740 / 183-1w) OX=278197 GN=PEPE_1356 PE=4 SV=1	Q03EH7_PEDPA	PEPE_1356	Uniprot_Pediococcus_pentosaceus_strain_ATCC.fasta	23273.8	1	6	7	21	0.000457	0.417	LVITNGGDIK	K	K	0.997	51	25	51	1029.59	2252	553283	79	88
sample Treatment	2022 5:30:55 PM;File Size: 1000722054 [Byte] (F057606)	LysM domain-containing protein OS=Pediococcus pentosaceus (strain ATCC 25745 / CCUG 21536 / LMG 10740 / 183-1w) OX=278197 GN=PEPE_1356 PE=4 SV=1	Q03EH7_PEDPA	PEPE_1356	Uniprot_Pediococcus_pentosaceus_strain_ATCC.fasta	23273.8	1	6	7	21	0.000457	0.417	NTNAANAATTSTTNNTTTTNNAASTQTTAK	K	S	0.997	127	25	127	2957.37	1674.5	698844	104	133
sample Treatment	2022 5:30:55 PM;File Size: 1000722054 [Byte] (F057606)	LysM domain-containing protein OS=Pediococcus pentosaceus (strain ATCC 25745 / CCUG 21536 / LMG 10740 / 183-1w) OX=278197 GN=PEPE_1356 PE=4 SV=1	Q03EH7_PEDPA	PEPE_1356	Uniprot_Pediococcus_pentosaceus_strain_ATCC.fasta	23273.8	1	6	7	21	0.000457	0.417	NVDVINVGQK	K	L	0.995	46.3	25	46.3	1085.6	2298	3329490	69	78
sample Treatment	2022 5:30:55 PM;File Size: 1000722054 [Byte] (F057606)	LysM domain-containing protein OS=Pediococcus pentosaceus (strain ATCC 25745 / CCUG 21536 / LMG 10740 / 183-1w) OX=278197 GN=PEPE_1356 PE=4 SV=1	Q03EH7_PEDPA	PEPE_1356	Uniprot_Pediococcus_pentosaceus_strain_ATCC.fasta	23273.8	1	6	7	21	0.000457	0.417	SLPEVAK	K	N	0.9	40	25	40	743.43	1869.5	2425820	97	103
sample Treatment	2022 5:30:55 PM;File Size: 1000722054 [Byte] (F057606)	LysM domain-containing protein OS=Pediococcus pentosaceus (strain ATCC 25745 / CCUG 21536 / LMG 10740 / 183-1w) OX=278197 GN=PEPE_1356 PE=4 SV=1	Q03EH7_PEDPA	PEPE_1356	Uniprot_Pediococcus_pentosaceus_strain_ATCC.fasta	23273.8	1	6	7	21	0.000457	0.417	SSYVAPAQSSTTTSSSNGGSVAQQMAAK	K	T	0.997	113	25	113	2703.25	2254	25051.6	134	161
sample Treatment	2022 5:30:55 PM;File Size: 1000722054 [Byte] (F057606)	LysM domain-containing protein OS=Pediococcus pentosaceus (strain ATCC 25745 / CCUG 21536 / LMG 10740 / 183-1w) OX=278197 GN=PEPE_1356 PE=4 SV=1	Q03EH7_PEDPA	PEPE_1356	Uniprot_Pediococcus_pentosaceus_strain_ATCC.fasta	23273.8	1	6	7	21	0.000457	0.417	TGVSAATWQR	K	I	0.997	73.1	25	72.5	1076.55	2113.5	2945400	162	171
sample Treatment	2022 5:30:55 PM;File Size: 1000722054 [Byte] (F057606)	Tyrosine--tRNA ligase OS=Pediococcus pentosaceus (strain ATCC 25745 / CCUG 21536 / LMG 10740 / 183-1w) OX=278197 GN=tyrS PE=3 SV=1	SYY_PEDPA	tyrS	Uniprot_Pediococcus_pentosaceus_strain_ATCC.fasta	47249.8	1	7	7	13	0.000283	0.18	DLTASEIEQGFK	K	N	0.997	50.6	25	50.6	1337.66	3026	108514	326	337
sample Treatment	2022 5:30:55 PM;File Size: 1000722054 [Byte] (F057606)	Tyrosine--tRNA ligase OS=Pediococcus pentosaceus (strain ATCC 25745 / CCUG 21536 / LMG 10740 / 183-1w) OX=278197 GN=tyrS PE=3 SV=1	SYY_PEDPA	tyrS	Uniprot_Pediococcus_pentosaceus_strain_ATCC.fasta	47249.8	1	7	7	13	0.000283	0.18	FFGTDNFR	K	M	0.927	29.5	25	23.4	1003.46	2779	119726	108	115
sample Treatment	2022 5:30:55 PM;File Size: 1000722054 [Byte] (F057606)	Tyrosine--tRNA ligase OS=Pediococcus pentosaceus (strain ATCC 25745 / CCUG 21536 / LMG 10740 / 183-1w) OX=278197 GN=tyrS PE=3 SV=1	SYY_PEDPA	tyrS	Uniprot_Pediococcus_pentosaceus_strain_ATCC.fasta	47249.8	1	7	7	13	0.000283	0.18	GAVNQQTDEEGLK	R	K	0.982	37.2	25	37.2	1388.67	1712	30795.3	11	23
sample Treatment	2022 5:30:55 PM;File Size: 1000722054 [Byte] (F057606)	Tyrosine--tRNA ligase OS=Pediococcus pentosaceus (strain ATCC 25745 / CCUG 21536 / LMG 10740 / 183-1w) OX=278197 GN=tyrS PE=3 SV=1	SYY_PEDPA	tyrS	Uniprot_Pediococcus_pentosaceus_strain_ATCC.fasta	47249.8	1	7	7	13	0.000283	0.18	GAVNQQTDEEGLKK	R	L	0.997	55.9	25	55.9	1516.76	1537.5	151637	11	24
sample Treatment	2022 5:30:55 PM;File Size: 1000722054 [Byte] (F057606)	Tyrosine--tRNA ligase OS=Pediococcus pentosaceus (strain ATCC 25745 / CCUG 21536 / LMG 10740 / 183-1w) OX=278197 GN=tyrS PE=3 SV=1	SYY_PEDPA	tyrS	Uniprot_Pediococcus_pentosaceus_strain_ATCC.fasta	47249.8	1	7	7	13	0.000283	0.18	SEGGNVWLDAEK	K	T	0.991	42	25	42	1304.61	2648	110198	231	242
sample Treatment	2022 5:30:55 PM;File Size: 1000722054 [Byte] (F057606)	Tyrosine--tRNA ligase OS=Pediococcus pentosaceus (strain ATCC 25745 / CCUG 21536 / LMG 10740 / 183-1w) OX=278197 GN=tyrS PE=3 SV=1	SYY_PEDPA	tyrS	Uniprot_Pediococcus_pentosaceus_strain_ATCC.fasta	47249.8	1	7	7	13	0.000283	0.18	VTDVNAEIDPASNFDGK	K	F	0.997	61.9	25	61.9	1791.84	2730	107127	384	400
sample Treatment	2022 5:30:55 PM;File Size: 1000722054 [Byte] (F057606)	Tyrosine--tRNA ligase OS=Pediococcus pentosaceus (strain ATCC 25745 / CCUG 21536 / LMG 10740 / 183-1w) OX=278197 GN=tyrS PE=3 SV=1	SYY_PEDPA	tyrS	Uniprot_Pediococcus_pentosaceus_strain_ATCC.fasta	47249.8	1	7	7	13	0.000283	0.18	YFTFLSHEEIER	K	L	0.988	40.7	25	40.7	1570.75	3147.5	146174	266	277
sample Treatment	2022 5:30:55 PM;File Size: 1000722054 [Byte] (F057606)	Cell division protein FtsI/penicillin-binding protein 2 OS=Pediococcus pentosaceus (strain ATCC 25745 / CCUG 21536 / LMG 10740 / 183-1w) OX=278197 GN=PEPE_1189 PE=3 SV=1	Q03EX9_PEDPA	PEPE_1189	Uniprot_Pediococcus_pentosaceus_strain_ATCC.fasta	78342.9	1	3	3	6	0.00013	0.068	EQSESAGSSILVGQR	K	I	0.996	49.7	25	49.7	1547.77	2242.5	69566.5	643	657
sample Treatment	2022 5:30:55 PM;File Size: 1000722054 [Byte] (F057606)	Cell division protein FtsI/penicillin-binding protein 2 OS=Pediococcus pentosaceus (strain ATCC 25745 / CCUG 21536 / LMG 10740 / 183-1w) OX=278197 GN=PEPE_1189 PE=3 SV=1	Q03EX9_PEDPA	PEPE_1189	Uniprot_Pediococcus_pentosaceus_strain_ATCC.fasta	78342.9	1	3	3	6	0.00013	0.068	IFTTSAAIDSGNFDSDATYR	K	S	0.997	63.7	25	63.7	2151.98	3010	22674.7	331	350
sample Treatment	2022 5:30:55 PM;File Size: 1000722054 [Byte] (F057606)	Cell division protein FtsI/penicillin-binding protein 2 OS=Pediococcus pentosaceus (strain ATCC 25745 / CCUG 21536 / LMG 10740 / 183-1w) OX=278197 GN=PEPE_1189 PE=3 SV=1	Q03EX9_PEDPA	PEPE_1189	Uniprot_Pediococcus_pentosaceus_strain_ATCC.fasta	78342.9	1	3	3	6	0.00013	0.068	LLQSTNSGLESESK	K	G	0.992	43.1	25	43.1	1492.75	2015.5	81449.7	407	420
sample Treatment	2022 5:30:55 PM;File Size: 1000722054 [Byte] (F057606)	30S ribosomal protein S15 OS=Pediococcus pentosaceus (strain ATCC 25745 / CCUG 21536 / LMG 10740 / 183-1w) OX=278197 GN=rpsO PE=3 SV=1	RS15_PEDPA	rpsO	Uniprot_Pediococcus_pentosaceus_strain_ATCC.fasta	10420.5	0.994	2	2	5	0.000109	0.157	KNEIIAK	K	Y	0.9	43.9	25	43.9	815.499	1257	97951.6	8	14
sample Treatment	2022 5:30:55 PM;File Size: 1000722054 [Byte] (F057606)	30S ribosomal protein S15 OS=Pediococcus pentosaceus (strain ATCC 25745 / CCUG 21536 / LMG 10740 / 183-1w) OX=278197 GN=rpsO PE=3 SV=1	RS15_PEDPA	rpsO	Uniprot_Pediococcus_pentosaceus_strain_ATCC.fasta	10420.5	0.994	2	2	5	0.000109	0.157	NLLAYLR	R	K	0.9	42.9	25	42.9	862.514	3389.5	889276	65	71
sample Treatment	2022 5:30:55 PM;File Size: 1000722054 [Byte] (F057606)	Zinc-type alcohol dehydrogenase-like protein OS=Pediococcus pentosaceus (strain ATCC 25745 / CCUG 21536 / LMG 10740 / 183-1w) OX=278197 GN=PEPE_1766 PE=3 SV=1	Q03DD5_PEDPA	PEPE_1766	Uniprot_Pediococcus_pentosaceus_strain_ATCC.fasta	38485.5	1	3	3	5	0.000109	0.0928	AGSDSEYQLVDER	R	V	0.997	92.9	25	92.9	1468.66	2334	119863	100	112
sample Treatment	2022 5:30:55 PM;File Size: 1000722054 [Byte] (F057606)	Zinc-type alcohol dehydrogenase-like protein OS=Pediococcus pentosaceus (strain ATCC 25745 / CCUG 21536 / LMG 10740 / 183-1w) OX=278197 GN=PEPE_1766 PE=3 SV=1	Q03DD5_PEDPA	PEPE_1766	Uniprot_Pediococcus_pentosaceus_strain_ATCC.fasta	38485.5	1	3	3	5	0.000109	0.0928	FETAVPQPEGR	R	D	0.988	40.1	25	40.1	1230.61	2179	124362	25	35
sample Treatment	2022 5:30:55 PM;File Size: 1000722054 [Byte] (F057606)	Zinc-type alcohol dehydrogenase-like protein OS=Pediococcus pentosaceus (strain ATCC 25745 / CCUG 21536 / LMG 10740 / 183-1w) OX=278197 GN=PEPE_1766 PE=3 SV=1	Q03DD5_PEDPA	PEPE_1766	Uniprot_Pediococcus_pentosaceus_strain_ATCC.fasta	38485.5	1	3	3	5	0.000109	0.0928	NNLIDEVR	R	N	0.98	36.5	25	36.5	972.511	2505	203698	209	216
sample Treatment	2022 5:30:55 PM;File Size: 1000722054 [Byte] (F057606)	tRNA uridine 5-carboxymethylaminomethyl modification enzyme MnmG OS=Pediococcus pentosaceus (strain ATCC 25745 / CCUG 21536 / LMG 10740 / 183-1w) OX=278197 GN=mnmG PE=3 SV=1	MNMG_PEDPA	mnmG	Uniprot_Pediococcus_pentosaceus_strain_ATCC.fasta	71107.5	0.992	1	1	1	2.17e-05	0.0157	DGVLASEFLR	K	R	0.976	35.3	25	35	1106.58	3255	57334.2	513	522
sample Treatment	2022 5:30:55 PM;File Size: 1000722054 [Byte] (F057606)	Predicted flavoprotein OS=Pediococcus pentosaceus (strain ATCC 25745 / CCUG 21536 / LMG 10740 / 183-1w) OX=278197 GN=PEPE_0027 PE=4 SV=1	Q03I34_PEDPA	PEPE_0027	Uniprot_Pediococcus_pentosaceus_strain_ATCC.fasta	20174	0.997	2	2	3	6.52e-05	0.0989	EIGIIVGSLR	K	E	0.967	33.5	25	33.5	1056.64	3170	94657	4	13
sample Treatment	2022 5:30:55 PM;File Size: 1000722054 [Byte] (F057606)	Predicted flavoprotein OS=Pediococcus pentosaceus (strain ATCC 25745 / CCUG 21536 / LMG 10740 / 183-1w) OX=278197 GN=PEPE_0027 PE=4 SV=1	Q03I34_PEDPA	PEPE_0027	Uniprot_Pediococcus_pentosaceus_strain_ATCC.fasta	20174	0.997	2	2	3	6.52e-05	0.0989	TFESILPK	K	E	0.972	34.5	25	34.5	934.524	2920	109381	24	31
sample Treatment	2022 5:30:55 PM;File Size: 1000722054 [Byte] (F057606)	Uncharacterized protein OS=Pediococcus pentosaceus (strain ATCC 25745 / CCUG 21536 / LMG 10740 / 183-1w) OX=278197 GN=PEPE_0869 PE=4 SV=1	Q03FU4_PEDPA	PEPE_0869	Uniprot_Pediococcus_pentosaceus_strain_ATCC.fasta	21946.4	1	3	3	4	8.7e-05	0.181	AQQVQQVQASLTK	K	S	0.997	55.4	25	55.4	1428.78	2169.5	157975	93	105
sample Treatment	2022 5:30:55 PM;File Size: 1000722054 [Byte] (F057606)	Uncharacterized protein OS=Pediococcus pentosaceus (strain ATCC 25745 / CCUG 21536 / LMG 10740 / 183-1w) OX=278197 GN=PEPE_0869 PE=4 SV=1	Q03FU4_PEDPA	PEPE_0869	Uniprot_Pediococcus_pentosaceus_strain_ATCC.fasta	21946.4	1	3	3	4	8.7e-05	0.181	GYAVQLNQPDK	K	N	0.986	39	25	38.5	1232.63	2205	73136.3	171	181
sample Treatment	2022 5:30:55 PM;File Size: 1000722054 [Byte] (F057606)	Uncharacterized protein OS=Pediococcus pentosaceus (strain ATCC 25745 / CCUG 21536 / LMG 10740 / 183-1w) OX=278197 GN=PEPE_0869 PE=4 SV=1	Q03FU4_PEDPA	PEPE_0869	Uniprot_Pediococcus_pentosaceus_strain_ATCC.fasta	21946.4	1	3	3	4	8.7e-05	0.181	TFSVSATDKDTK	K	K	0.994	46.4	25	46.4	1299.64	1830	72622.3	121	132
sample Treatment	2022 5:30:55 PM;File Size: 1000722054 [Byte] (F057606)	Transcriptional regulator OS=Pediococcus pentosaceus (strain ATCC 25745 / CCUG 21536 / LMG 10740 / 183-1w) OX=278197 GN=PEPE_1441 PE=3 SV=1	Q03EA0_PEDPA	PEPE_1441	Uniprot_Pediococcus_pentosaceus_strain_ATCC.fasta	47963.8	1	3	3	6	0.00013	0.0911	INAAYDLGGAGTAIK	K	A	0.997	53.8	25	53.8	1434.76	2707.5	119513	162	176
sample Treatment	2022 5:30:55 PM;File Size: 1000722054 [Byte] (F057606)	Transcriptional regulator OS=Pediococcus pentosaceus (strain ATCC 25745 / CCUG 21536 / LMG 10740 / 183-1w) OX=278197 GN=PEPE_1441 PE=3 SV=1	Q03EA0_PEDPA	PEPE_1441	Uniprot_Pediococcus_pentosaceus_strain_ATCC.fasta	47963.8	1	3	3	6	0.00013	0.0911	IVDGVGGIDITPK	K	L	0.996	49.2	25	49.2	1283.72	2873	296057	200	212
sample Treatment	2022 5:30:55 PM;File Size: 1000722054 [Byte] (F057606)	Transcriptional regulator OS=Pediococcus pentosaceus (strain ATCC 25745 / CCUG 21536 / LMG 10740 / 183-1w) OX=278197 GN=PEPE_1441 PE=3 SV=1	Q03EA0_PEDPA	PEPE_1441	Uniprot_Pediococcus_pentosaceus_strain_ATCC.fasta	47963.8	1	3	3	6	0.00013	0.0911	TDTIIVATLNPK	R	K	0.992	42.4	25	42.4	1285.74	2951.5	169622	123	134
sample Treatment	2022 5:30:55 PM;File Size: 1000722054 [Byte] (F057606)	Xre-like DNA-binding protein OS=Pediococcus pentosaceus (strain ATCC 25745 / CCUG 21536 / LMG 10740 / 183-1w) OX=278197 GN=PEPE_1279 PE=4 SV=1	Q03EQ2_PEDPA	PEPE_1279	Uniprot_Pediococcus_pentosaceus_strain_ATCC.fasta	32298.8	0.999	2	2	2	4.35e-05	0.111	GWTIEEVQFK	K	L	0.967	33.6	25	30.3	1236.63	3335	56565	21	30
sample Treatment	2022 5:30:55 PM;File Size: 1000722054 [Byte] (F057606)	Xre-like DNA-binding protein OS=Pediococcus pentosaceus (strain ATCC 25745 / CCUG 21536 / LMG 10740 / 183-1w) OX=278197 GN=PEPE_1279 PE=4 SV=1	Q03EQ2_PEDPA	PEPE_1279	Uniprot_Pediococcus_pentosaceus_strain_ATCC.fasta	32298.8	0.999	2	2	2	4.35e-05	0.111	INNSSDNLEVTLAAGSQHANLK	K	M	0.992	43.6	25	43.6	2296.15	2856	53594.5	190	211
sample Treatment	2022 5:30:55 PM;File Size: 1000722054 [Byte] (F057606)	ATP-binding subunit of Clp protease and DnaK/DnaJ chaperones OS=Pediococcus pentosaceus (strain ATCC 25745 / CCUG 21536 / LMG 10740 / 183-1w) OX=278197 GN=PEPE_0976 PE=4 SV=1	Q03FJ0_PEDPA	PEPE_0976	Uniprot_Pediococcus_pentosaceus_strain_ATCC.fasta	78012.3	1	30	38	85	0.00185	0.524	ADLKDDQIVIEQA	K	-	0.981	36.7	25	36.7	1457.75	2699.5	607882	692	704
sample Treatment	2022 5:30:55 PM;File Size: 1000722054 [Byte] (F057606)	ATP-binding subunit of Clp protease and DnaK/DnaJ chaperones OS=Pediococcus pentosaceus (strain ATCC 25745 / CCUG 21536 / LMG 10740 / 183-1w) OX=278197 GN=PEPE_0976 PE=4 SV=1	Q03FJ0_PEDPA	PEPE_0976	Uniprot_Pediococcus_pentosaceus_strain_ATCC.fasta	78012.3	1	30	38	85	0.00185	0.524	AIDLIDMTAAHLAAHQPENDETALK	K	E	0.995	48.7	25	48.7	2688.33	3479	116399	311	335
sample Treatment	2022 5:30:55 PM;File Size: 1000722054 [Byte] (F057606)	ATP-binding subunit of Clp protease and DnaK/DnaJ chaperones OS=Pediococcus pentosaceus (strain ATCC 25745 / CCUG 21536 / LMG 10740 / 183-1w) OX=278197 GN=PEPE_0976 PE=4 SV=1	Q03FJ0_PEDPA	PEPE_0976	Uniprot_Pediococcus_pentosaceus_strain_ATCC.fasta	78012.3	1	30	38	85	0.00185	0.524	ATVDYSIQYIPQR	K	T	0.997	77.4	25	77.4	1553.8	2818.5	493546	293	305
sample Treatment	2022 5:30:55 PM;File Size: 1000722054 [Byte] (F057606)	ATP-binding subunit of Clp protease and DnaK/DnaJ chaperones OS=Pediococcus pentosaceus (strain ATCC 25745 / CCUG 21536 / LMG 10740 / 183-1w) OX=278197 GN=PEPE_0976 PE=4 SV=1	Q03FJ0_PEDPA	PEPE_0976	Uniprot_Pediococcus_pentosaceus_strain_ATCC.fasta	78012.3	1	30	38	85	0.00185	0.524	DKEIYSIDLSSLEAGTQYR	R	G	0.997	56.1	25	56.1	2188.08	3438	153846	153	171
sample Treatment	2022 5:30:55 PM;File Size: 1000722054 [Byte] (F057606)	ATP-binding subunit of Clp protease and DnaK/DnaJ chaperones OS=Pediococcus pentosaceus (strain ATCC 25745 / CCUG 21536 / LMG 10740 / 183-1w) OX=278197 GN=PEPE_0976 PE=4 SV=1	Q03FJ0_PEDPA	PEPE_0976	Uniprot_Pediococcus_pentosaceus_strain_ATCC.fasta	78012.3	1	30	38	85	0.00185	0.524	DKVTDFYLDHLDIK	R	H	0.997	52.2	25	52.2	1721.87	3317.5	443554	675	688
sample Treatment	2022 5:30:55 PM;File Size: 1000722054 [Byte] (F057606)	ATP-binding subunit of Clp protease and DnaK/DnaJ chaperones OS=Pediococcus pentosaceus (strain ATCC 25745 / CCUG 21536 / LMG 10740 / 183-1w) OX=278197 GN=PEPE_0976 PE=4 SV=1	Q03FJ0_PEDPA	PEPE_0976	Uniprot_Pediococcus_pentosaceus_strain_ATCC.fasta	78012.3	1	30	38	85	0.00185	0.524	EEVVATVDDVAQSVER	K	L	0.997	85.8	25	85.8	1745.86	3251	464483	378	393
sample Treatment	2022 5:30:55 PM;File Size: 1000722054 [Byte] (F057606)	ATP-binding subunit of Clp protease and DnaK/DnaJ chaperones OS=Pediococcus pentosaceus (strain ATCC 25745 / CCUG 21536 / LMG 10740 / 183-1w) OX=278197 GN=PEPE_0976 PE=4 SV=1	Q03FJ0_PEDPA	PEPE_0976	Uniprot_Pediococcus_pentosaceus_strain_ATCC.fasta	78012.3	1	30	38	85	0.00185	0.524	EIYSIDLSSLEAGTQYR	K	G	0.996	49.2	25	49.2	1944.95	3567	35615.5	155	171
sample Treatment	2022 5:30:55 PM;File Size: 1000722054 [Byte] (F057606)	ATP-binding subunit of Clp protease and DnaK/DnaJ chaperones OS=Pediococcus pentosaceus (strain ATCC 25745 / CCUG 21536 / LMG 10740 / 183-1w) OX=278197 GN=PEPE_0976 PE=4 SV=1	Q03FJ0_PEDPA	PEPE_0976	Uniprot_Pediococcus_pentosaceus_strain_ATCC.fasta	78012.3	1	30	38	85	0.00185	0.524	ENEIQETAEILSR	R	R	0.997	75.3	25	75.3	1531.76	3418.5	139884	103	115
sample Treatment	2022 5:30:55 PM;File Size: 1000722054 [Byte] (F057606)	ATP-binding subunit of Clp protease and DnaK/DnaJ chaperones OS=Pediococcus pentosaceus (strain ATCC 25745 / CCUG 21536 / LMG 10740 / 183-1w) OX=278197 GN=PEPE_0976 PE=4 SV=1	Q03FJ0_PEDPA	PEPE_0976	Uniprot_Pediococcus_pentosaceus_strain_ATCC.fasta	78012.3	1	30	38	85	0.00185	0.524	FNDVVVNEPNAEDTLEILK	R	G	0.997	57.2	25	57.2	2159.09	3589.5	108079	254	272
sample Treatment	2022 5:30:55 PM;File Size: 1000722054 [Byte] (F057606)	ATP-binding subunit of Clp protease and DnaK/DnaJ chaperones OS=Pediococcus pentosaceus (strain ATCC 25745 / CCUG 21536 / LMG 10740 / 183-1w) OX=278197 GN=PEPE_0976 PE=4 SV=1	Q03FJ0_PEDPA	PEPE_0976	Uniprot_Pediococcus_pentosaceus_strain_ATCC.fasta	78012.3	1	30	38	85	0.00185	0.524	FNGIVEFSHLTK	R	K	0.99	41.9	25	41.9	1391.73	3129	248540	605	616
sample Treatment	2022 5:30:55 PM;File Size: 1000722054 [Byte] (F057606)	ATP-binding subunit of Clp protease and DnaK/DnaJ chaperones OS=Pediococcus pentosaceus (strain ATCC 25745 / CCUG 21536 / LMG 10740 / 183-1w) OX=278197 GN=PEPE_0976 PE=4 SV=1	Q03FJ0_PEDPA	PEPE_0976	Uniprot_Pediococcus_pentosaceus_strain_ATCC.fasta	78012.3	1	30	38	85	0.00185	0.524	GELTVIGATTQDEYR	R	N	0.997	74.9	25	74.9	1652.81	2792	629578	227	241
sample Treatment	2022 5:30:55 PM;File Size: 1000722054 [Byte] (F057606)	ATP-binding subunit of Clp protease and DnaK/DnaJ chaperones OS=Pediococcus pentosaceus (strain ATCC 25745 / CCUG 21536 / LMG 10740 / 183-1w) OX=278197 GN=PEPE_0976 PE=4 SV=1	Q03FJ0_PEDPA	PEPE_0976	Uniprot_Pediococcus_pentosaceus_strain_ATCC.fasta	78012.3	1	30	38	85	0.00185	0.524	GLADIIKPALSR	K	G	0.995	48.2	25	48.2	1253.76	3155.5	695391	215	226
sample Treatment	2022 5:30:55 PM;File Size: 1000722054 [Byte] (F057606)	ATP-binding subunit of Clp protease and DnaK/DnaJ chaperones OS=Pediococcus pentosaceus (strain ATCC 25745 / CCUG 21536 / LMG 10740 / 183-1w) OX=278197 GN=PEPE_0976 PE=4 SV=1	Q03FJ0_PEDPA	PEPE_0976	Uniprot_Pediococcus_pentosaceus_strain_ATCC.fasta	78012.3	1	30	38	85	0.00185	0.524	GSFEENIKDLVK	R	E	0.997	57.7	25	57.7	1378.72	3159	101351	172	183
sample Treatment	2022 5:30:55 PM;File Size: 1000722054 [Byte] (F057606)	ATP-binding subunit of Clp protease and DnaK/DnaJ chaperones OS=Pediococcus pentosaceus (strain ATCC 25745 / CCUG 21536 / LMG 10740 / 183-1w) OX=278197 GN=PEPE_0976 PE=4 SV=1	Q03FJ0_PEDPA	PEPE_0976	Uniprot_Pediococcus_pentosaceus_strain_ATCC.fasta	78012.3	1	30	38	85	0.00185	0.524	KEEVVATVDDVAQSVER	K	L	0.997	73.1	25	73.1	1873.95	3103.5	578478	377	393
sample Treatment	2022 5:30:55 PM;File Size: 1000722054 [Byte] (F057606)	ATP-binding subunit of Clp protease and DnaK/DnaJ chaperones OS=Pediococcus pentosaceus (strain ATCC 25745 / CCUG 21536 / LMG 10740 / 183-1w) OX=278197 GN=PEPE_0976 PE=4 SV=1	Q03FJ0_PEDPA	PEPE_0976	Uniprot_Pediococcus_pentosaceus_strain_ATCC.fasta	78012.3	1	30	38	85	0.00185	0.524	LDMSEYSDR	R	T	0.997	52.4	25	52.4	1115.47	2164.5	490439	483	491
sample Treatment	2022 5:30:55 PM;File Size: 1000722054 [Byte] (F057606)	ATP-binding subunit of Clp protease and DnaK/DnaJ chaperones OS=Pediococcus pentosaceus (strain ATCC 25745 / CCUG 21536 / LMG 10740 / 183-1w) OX=278197 GN=PEPE_0976 PE=4 SV=1	Q03FJ0_PEDPA	PEPE_0976	Uniprot_Pediococcus_pentosaceus_strain_ATCC.fasta	78012.3	1	30	38	85	0.00185	0.524	LGTNLTEQAR	K	D	0.984	38	25	24.9	1102.59	1969.5	2293750	83	92
sample Treatment	2022 5:30:55 PM;File Size: 1000722054 [Byte] (F057606)	ATP-binding subunit of Clp protease and DnaK/DnaJ chaperones OS=Pediococcus pentosaceus (strain ATCC 25745 / CCUG 21536 / LMG 10740 / 183-1w) OX=278197 GN=PEPE_0976 PE=4 SV=1	Q03FJ0_PEDPA	PEPE_0976	Uniprot_Pediococcus_pentosaceus_strain_ATCC.fasta	78012.3	1	30	38	85	0.00185	0.524	LIGTSAGYVGYDDNSNTLTER	K	V	0.997	104	25	104	2246.06	2779	67065.3	497	517
sample Treatment	2022 5:30:55 PM;File Size: 1000722054 [Byte] (F057606)	ATP-binding subunit of Clp protease and DnaK/DnaJ chaperones OS=Pediococcus pentosaceus (strain ATCC 25745 / CCUG 21536 / LMG 10740 / 183-1w) OX=278197 GN=PEPE_0976 PE=4 SV=1	Q03FJ0_PEDPA	PEPE_0976	Uniprot_Pediococcus_pentosaceus_strain_ATCC.fasta	78012.3	1	30	38	85	0.00185	0.524	LPDDVLK	K	A	0.9	36	25	28.8	799.456	2302.5	284229	286	292
sample Treatment	2022 5:30:55 PM;File Size: 1000722054 [Byte] (F057606)	ATP-binding subunit of Clp protease and DnaK/DnaJ chaperones OS=Pediococcus pentosaceus (strain ATCC 25745 / CCUG 21536 / LMG 10740 / 183-1w) OX=278197 GN=PEPE_0976 PE=4 SV=1	Q03FJ0_PEDPA	PEPE_0976	Uniprot_Pediococcus_pentosaceus_strain_ATCC.fasta	78012.3	1	30	38	85	0.00185	0.524	LTDGQGNVINFK	R	N	0.997	82.3	25	82.3	1305.68	2594	808711	551	562
sample Treatment	2022 5:30:55 PM;File Size: 1000722054 [Byte] (F057606)	ATP-binding subunit of Clp protease and DnaK/DnaJ chaperones OS=Pediococcus pentosaceus (strain ATCC 25745 / CCUG 21536 / LMG 10740 / 183-1w) OX=278197 GN=PEPE_0976 PE=4 SV=1	Q03FJ0_PEDPA	PEPE_0976	Uniprot_Pediococcus_pentosaceus_strain_ATCC.fasta	78012.3	1	30	38	85	0.00185	0.524	LTGDADKDQTLMDK	K	L	0.997	81.8	25	81.8	1550.74	1915	613902	579	592
sample Treatment	2022 5:30:55 PM;File Size: 1000722054 [Byte] (F057606)	ATP-binding subunit of Clp protease and DnaK/DnaJ chaperones OS=Pediococcus pentosaceus (strain ATCC 25745 / CCUG 21536 / LMG 10740 / 183-1w) OX=278197 GN=PEPE_0976 PE=4 SV=1	Q03FJ0_PEDPA	PEPE_0976	Uniprot_Pediococcus_pentosaceus_strain_ATCC.fasta	78012.3	1	30	38	85	0.00185	0.524	LTGIPVSDMGANDIER	R	L	0.997	82.1	25	82.1	1687.83	2939	387029	394	409
sample Treatment	2022 5:30:55 PM;File Size: 1000722054 [Byte] (F057606)	ATP-binding subunit of Clp protease and DnaK/DnaJ chaperones OS=Pediococcus pentosaceus (strain ATCC 25745 / CCUG 21536 / LMG 10740 / 183-1w) OX=278197 GN=PEPE_0976 PE=4 SV=1	Q03FJ0_PEDPA	PEPE_0976	Uniprot_Pediococcus_pentosaceus_strain_ATCC.fasta	78012.3	1	30	38	85	0.00185	0.524	NNPILVGDAGVGK	K	T	0.994	45.6	25	45.6	1253.68	2490	854868	119	131
sample Treatment	2022 5:30:55 PM;File Size: 1000722054 [Byte] (F057606)	ATP-binding subunit of Clp protease and DnaK/DnaJ chaperones OS=Pediococcus pentosaceus (strain ATCC 25745 / CCUG 21536 / LMG 10740 / 183-1w) OX=278197 GN=PEPE_0976 PE=4 SV=1	Q03FJ0_PEDPA	PEPE_0976	Uniprot_Pediococcus_pentosaceus_strain_ATCC.fasta	78012.3	1	30	38	85	0.00185	0.524	NPYSIVLLDEIEK	R	A	0.997	62.4	25	62.4	1532.82	3762	375297	521	533
sample Treatment	2022 5:30:55 PM;File Size: 1000722054 [Byte] (F057606)	ATP-binding subunit of Clp protease and DnaK/DnaJ chaperones OS=Pediococcus pentosaceus (strain ATCC 25745 / CCUG 21536 / LMG 10740 / 183-1w) OX=278197 GN=PEPE_0976 PE=4 SV=1	Q03FJ0_PEDPA	PEPE_0976	Uniprot_Pediococcus_pentosaceus_strain_ATCC.fasta	78012.3	1	30	38	85	0.00185	0.524	NTIIIATSNAGFGNEK	K	L	0.997	91.8	25	91.8	1649.85	2822	406367	563	578
sample Treatment	2022 5:30:55 PM;File Size: 1000722054 [Byte] (F057606)	ATP-binding subunit of Clp protease and DnaK/DnaJ chaperones OS=Pediococcus pentosaceus (strain ATCC 25745 / CCUG 21536 / LMG 10740 / 183-1w) OX=278197 GN=PEPE_0976 PE=4 SV=1	Q03FJ0_PEDPA	PEPE_0976	Uniprot_Pediococcus_pentosaceus_strain_ATCC.fasta	78012.3	1	30	38	85	0.00185	0.524	QLALDMFGDKDAIIR	K	L	0.997	61.1	25	61.1	1705.89	3536.5	277391	468	482
sample Treatment	2022 5:30:55 PM;File Size: 1000722054 [Byte] (F057606)	ATP-binding subunit of Clp protease and DnaK/DnaJ chaperones OS=Pediococcus pentosaceus (strain ATCC 25745 / CCUG 21536 / LMG 10740 / 183-1w) OX=278197 GN=PEPE_0976 PE=4 SV=1	Q03FJ0_PEDPA	PEPE_0976	Uniprot_Pediococcus_pentosaceus_strain_ATCC.fasta	78012.3	1	30	38	85	0.00185	0.524	RFNDVVVNEPNAEDTLEILK	R	G	0.996	49.4	25	49.4	2315.19	3449.5	331727	253	272
sample Treatment	2022 5:30:55 PM;File Size: 1000722054 [Byte] (F057606)	ATP-binding subunit of Clp protease and DnaK/DnaJ chaperones OS=Pediococcus pentosaceus (strain ATCC 25745 / CCUG 21536 / LMG 10740 / 183-1w) OX=278197 GN=PEPE_0976 PE=4 SV=1	Q03FJ0_PEDPA	PEPE_0976	Uniprot_Pediococcus_pentosaceus_strain_ATCC.fasta	78012.3	1	30	38	85	0.00185	0.524	RNPYSIVLLDEIEK	R	A	0.997	54	25	54	1688.92	3558	51629.7	520	533
sample Treatment	2022 5:30:55 PM;File Size: 1000722054 [Byte] (F057606)	ATP-binding subunit of Clp protease and DnaK/DnaJ chaperones OS=Pediococcus pentosaceus (strain ATCC 25745 / CCUG 21536 / LMG 10740 / 183-1w) OX=278197 GN=PEPE_0976 PE=4 SV=1	Q03FJ0_PEDPA	PEPE_0976	Uniprot_Pediococcus_pentosaceus_strain_ATCC.fasta	78012.3	1	30	38	85	0.00185	0.524	VIEQQIR	R	D	0.9	40.7	25	40.7	885.515	1699.5	860229	668	674
sample Treatment	2022 5:30:55 PM;File Size: 1000722054 [Byte] (F057606)	ATP-binding subunit of Clp protease and DnaK/DnaJ chaperones OS=Pediococcus pentosaceus (strain ATCC 25745 / CCUG 21536 / LMG 10740 / 183-1w) OX=278197 GN=PEPE_0976 PE=4 SV=1	Q03FJ0_PEDPA	PEPE_0976	Uniprot_Pediococcus_pentosaceus_strain_ATCC.fasta	78012.3	1	30	38	85	0.00185	0.524	VIGQDEAVAMVAR	K	A	0.997	77.8	25	77.8	1358.71	2679	177524	421	433
sample Treatment	2022 5:30:55 PM;File Size: 1000722054 [Byte] (F057606)	ATP-binding subunit of Clp protease and DnaK/DnaJ chaperones OS=Pediococcus pentosaceus (strain ATCC 25745 / CCUG 21536 / LMG 10740 / 183-1w) OX=278197 GN=PEPE_0976 PE=4 SV=1	Q03FJ0_PEDPA	PEPE_0976	Uniprot_Pediococcus_pentosaceus_strain_ATCC.fasta	78012.3	1	30	38	85	0.00185	0.524	YLVNGQSLTPDEFAQYR	R	A	0.997	69.2	25	69.2	2000.97	3238	84911.9	36	52
sample Treatment	2022 5:30:55 PM;File Size: 1000722054 [Byte] (F057606)	Predicted flavoprotein with PAS domain OS=Pediococcus pentosaceus (strain ATCC 25745 / CCUG 21536 / LMG 10740 / 183-1w) OX=278197 GN=PEPE_1347 PE=4 SV=1	Q03EI6_PEDPA	PEPE_1347	Uniprot_Pediococcus_pentosaceus_strain_ATCC.fasta	47873.8	0.917	1	1	2	4.35e-05	0.0346	LVAIAGSIGEQSYNR	K	M	0.995	47.2	25	47.2	1577.83	2732	70051.8	3	17
sample Treatment	2022 5:30:55 PM;File Size: 1000722054 [Byte] (F057606)	Cell division initiation protein OS=Pediococcus pentosaceus (strain ATCC 25745 / CCUG 21536 / LMG 10740 / 183-1w) OX=278197 GN=PEPE_1180 PE=4 SV=1	Q03EY8_PEDPA	PEPE_1180	Uniprot_Pediococcus_pentosaceus_strain_ATCC.fasta	27658.6	1	11	13	25	0.000543	0.362	ADSYIGEAAGK	K	A	0.997	74.2	25	64.7	1081.52	1906	360910	111	121
sample Treatment	2022 5:30:55 PM;File Size: 1000722054 [Byte] (F057606)	Cell division initiation protein OS=Pediococcus pentosaceus (strain ATCC 25745 / CCUG 21536 / LMG 10740 / 183-1w) OX=278197 GN=PEPE_1180 PE=4 SV=1	Q03EY8_PEDPA	PEPE_1180	Uniprot_Pediococcus_pentosaceus_strain_ATCC.fasta	27658.6	1	11	13	25	0.000543	0.362	EAEFTSK	R	E	0.9	32.1	25	3.37	811.383	1278	29975.5	88	94
sample Treatment	2022 5:30:55 PM;File Size: 1000722054 [Byte] (F057606)	Cell division initiation protein OS=Pediococcus pentosaceus (strain ATCC 25745 / CCUG 21536 / LMG 10740 / 183-1w) OX=278197 GN=PEPE_1180 PE=4 SV=1	Q03EY8_PEDPA	PEPE_1180	Uniprot_Pediococcus_pentosaceus_strain_ATCC.fasta	27658.6	1	11	13	25	0.000543	0.362	IDYFDEMKESLNK	R	S	0.915	29	25	29	1631.76	3257	93693.6	57	69
sample Treatment	2022 5:30:55 PM;File Size: 1000722054 [Byte] (F057606)	Cell division initiation protein OS=Pediococcus pentosaceus (strain ATCC 25745 / CCUG 21536 / LMG 10740 / 183-1w) OX=278197 GN=PEPE_1180 PE=4 SV=1	Q03EY8_PEDPA	PEPE_1180	Uniprot_Pediococcus_pentosaceus_strain_ATCC.fasta	27658.6	1	11	13	25	0.000543	0.362	KADSYIGEAAGK	K	A	0.989	41.2	25	33	1209.61	1759	79884.9	110	121
sample Treatment	2022 5:30:55 PM;File Size: 1000722054 [Byte] (F057606)	Cell division initiation protein OS=Pediococcus pentosaceus (strain ATCC 25745 / CCUG 21536 / LMG 10740 / 183-1w) OX=278197 GN=PEPE_1180 PE=4 SV=1	Q03EY8_PEDPA	PEPE_1180	Uniprot_Pediococcus_pentosaceus_strain_ATCC.fasta	27658.6	1	11	13	25	0.000543	0.362	LHDEIDTLR	R	S	0.994	45.5	25	37.7	1111.57	2172	308556	39	47
sample Treatment	2022 5:30:55 PM;File Size: 1000722054 [Byte] (F057606)	Cell division initiation protein OS=Pediococcus pentosaceus (strain ATCC 25745 / CCUG 21536 / LMG 10740 / 183-1w) OX=278197 GN=PEPE_1180 PE=4 SV=1	Q03EY8_PEDPA	PEPE_1180	Uniprot_Pediococcus_pentosaceus_strain_ATCC.fasta	27658.6	1	11	13	25	0.000543	0.362	QKFEVLLESQLQMIK	R	G	0.997	59.7	25	59.7	1834.01	3783	227436	141	155
sample Treatment	2022 5:30:55 PM;File Size: 1000722054 [Byte] (F057606)	Cell division initiation protein OS=Pediococcus pentosaceus (strain ATCC 25745 / CCUG 21536 / LMG 10740 / 183-1w) OX=278197 GN=PEPE_1180 PE=4 SV=1	Q03EY8_PEDPA	PEPE_1180	Uniprot_Pediococcus_pentosaceus_strain_ATCC.fasta	27658.6	1	11	13	25	0.000543	0.362	RLHDEIDTLR	R	S	0.997	60	25	60	1267.68	2065.5	751867	38	47
sample Treatment	2022 5:30:55 PM;File Size: 1000722054 [Byte] (F057606)	Cell division initiation protein OS=Pediococcus pentosaceus (strain ATCC 25745 / CCUG 21536 / LMG 10740 / 183-1w) OX=278197 GN=PEPE_1180 PE=4 SV=1	Q03EY8_PEDPA	PEPE_1180	Uniprot_Pediococcus_pentosaceus_strain_ATCC.fasta	27658.6	1	11	13	25	0.000543	0.362	SIEPQDIQQK	M	Q	0.997	56.5	25	56.5	1185.61	1911.5	290418	2	11
sample Treatment	2022 5:30:55 PM;File Size: 1000722054 [Byte] (F057606)	Cell division initiation protein OS=Pediococcus pentosaceus (strain ATCC 25745 / CCUG 21536 / LMG 10740 / 183-1w) OX=278197 GN=PEPE_1180 PE=4 SV=1	Q03EY8_PEDPA	PEPE_1180	Uniprot_Pediococcus_pentosaceus_strain_ATCC.fasta	27658.6	1	11	13	25	0.000543	0.362	SIMVAQDAADK	K	V	0.997	54.6	25	54.6	1164.56	1981	463650	70	80
sample Treatment	2022 5:30:55 PM;File Size: 1000722054 [Byte] (F057606)	Cell division initiation protein OS=Pediococcus pentosaceus (strain ATCC 25745 / CCUG 21536 / LMG 10740 / 183-1w) OX=278197 GN=PEPE_1180 PE=4 SV=1	Q03EY8_PEDPA	PEPE_1180	Uniprot_Pediococcus_pentosaceus_strain_ATCC.fasta	27658.6	1	11	13	25	0.000543	0.362	VVIATDDLK	K	K	0.997	68.7	25	68.7	973.557	2345.5	298563	125	133
sample Treatment	2022 5:30:55 PM;File Size: 1000722054 [Byte] (F057606)	Cell division initiation protein OS=Pediococcus pentosaceus (strain ATCC 25745 / CCUG 21536 / LMG 10740 / 183-1w) OX=278197 GN=PEPE_1180 PE=4 SV=1	Q03EY8_PEDPA	PEPE_1180	Uniprot_Pediococcus_pentosaceus_strain_ATCC.fasta	27658.6	1	11	13	25	0.000543	0.362	VVIATDDLKK	K	Q	0.983	37.8	25	37.8	1101.65	2070	377963	125	134
sample Treatment	2022 5:30:55 PM;File Size: 1000722054 [Byte] (F057606)	50S ribosomal protein L35 OS=Pediococcus pentosaceus (strain ATCC 25745 / CCUG 21536 / LMG 10740 / 183-1w) OX=278197 GN=rpmI PE=3 SV=1	RL35_PEDPA	rpmI	Uniprot_Pediococcus_pentosaceus_strain_ATCC.fasta	7498.3	1	3	6	32	0.000696	0.323	GTDMMDSTNVK	R	R	0.997	78.6	25	10.4	1214.5	1520	2987440	46	56
sample Treatment	2022 5:30:55 PM;File Size: 1000722054 [Byte] (F057606)	50S ribosomal protein L35 OS=Pediococcus pentosaceus (strain ATCC 25745 / CCUG 21536 / LMG 10740 / 183-1w) OX=278197 GN=rpmI PE=3 SV=1	RL35_PEDPA	rpmI	Uniprot_Pediococcus_pentosaceus_strain_ATCC.fasta	7498.3	1	3	6	32	0.000696	0.323	GTDMMDSTNVKR	R	Y	0.997	61.8	25	13.4	1370.6	1799	232883	46	57
sample Treatment	2022 5:30:55 PM;File Size: 1000722054 [Byte] (F057606)	50S ribosomal protein L35 OS=Pediococcus pentosaceus (strain ATCC 25745 / CCUG 21536 / LMG 10740 / 183-1w) OX=278197 GN=rpmI PE=3 SV=1	RL35_PEDPA	rpmI	Uniprot_Pediococcus_pentosaceus_strain_ATCC.fasta	7498.3	1	3	6	32	0.000696	0.323	SANAYTSHR	K	F	0.997	57.4	25	57.4	1006.47	976.5	528896	24	32
sample Treatment	2022 5:30:55 PM;File Size: 1000722054 [Byte] (F057606)	UDP-glucose 4-epimerase OS=Pediococcus pentosaceus (strain ATCC 25745 / CCUG 21536 / LMG 10740 / 183-1w) OX=278197 GN=PEPE_1475 PE=3 SV=1	Q03E66_PEDPA	PEPE_1475	Uniprot_Pediococcus_pentosaceus_strain_ATCC.fasta	36674	1	10	13	27	0.000587	0.382	AGNDSDVFNLGSSTGFSVK	K	E	0.997	91.8	25	87.1	1901.89	3354	109292	242	260
sample Treatment	2022 5:30:55 PM;File Size: 1000722054 [Byte] (F057606)	UDP-glucose 4-epimerase OS=Pediococcus pentosaceus (strain ATCC 25745 / CCUG 21536 / LMG 10740 / 183-1w) OX=278197 GN=PEPE_1475 PE=3 SV=1	Q03E66_PEDPA	PEPE_1475	Uniprot_Pediococcus_pentosaceus_strain_ATCC.fasta	36674	1	10	13	27	0.000587	0.382	DQLQIFGDDYHTPDGTNVR	R	D	0.997	67.8	25	67.8	2191.01	3059.5	637602	203	221
sample Treatment	2022 5:30:55 PM;File Size: 1000722054 [Byte] (F057606)	UDP-glucose 4-epimerase OS=Pediococcus pentosaceus (strain ATCC 25745 / CCUG 21536 / LMG 10740 / 183-1w) OX=278197 GN=PEPE_1475 PE=3 SV=1	Q03E66_PEDPA	PEPE_1475	Uniprot_Pediococcus_pentosaceus_strain_ATCC.fasta	36674	1	10	13	27	0.000587	0.382	DVVVVDNLSTGHR	R	G	0.997	61.2	25	56.9	1410.73	2398.5	804607	26	38
sample Treatment	2022 5:30:55 PM;File Size: 1000722054 [Byte] (F057606)	UDP-glucose 4-epimerase OS=Pediococcus pentosaceus (strain ATCC 25745 / CCUG 21536 / LMG 10740 / 183-1w) OX=278197 GN=PEPE_1475 PE=3 SV=1	Q03E66_PEDPA	PEPE_1475	Uniprot_Pediococcus_pentosaceus_strain_ATCC.fasta	36674	1	10	13	27	0.000587	0.382	EATGEAIPAK	R	I	0.997	58.8	25	58.8	986.515	1561.5	214182	268	277
sample Treatment	2022 5:30:55 PM;File Size: 1000722054 [Byte] (F057606)	UDP-glucose 4-epimerase OS=Pediococcus pentosaceus (strain ATCC 25745 / CCUG 21536 / LMG 10740 / 183-1w) OX=278197 GN=PEPE_1475 PE=3 SV=1	Q03E66_PEDPA	PEPE_1475	Uniprot_Pediococcus_pentosaceus_strain_ATCC.fasta	36674	1	10	13	27	0.000587	0.382	FYEGDIR	K	D	0.9	39.7	25	39.7	899.426	2115	183253	47	53
sample Treatment	2022 5:30:55 PM;File Size: 1000722054 [Byte] (F057606)	UDP-glucose 4-epimerase OS=Pediococcus pentosaceus (strain ATCC 25745 / CCUG 21536 / LMG 10740 / 183-1w) OX=278197 GN=PEPE_1475 PE=3 SV=1	Q03E66_PEDPA	PEPE_1475	Uniprot_Pediococcus_pentosaceus_strain_ATCC.fasta	36674	1	10	13	27	0.000587	0.382	QAPINPYGESK	R	L	0.997	53.2	25	53.2	1203.6	1919.5	175508	135	145
sample Treatment	2022 5:30:55 PM;File Size: 1000722054 [Byte] (F057606)	UDP-glucose 4-epimerase OS=Pediococcus pentosaceus (strain ATCC 25745 / CCUG 21536 / LMG 10740 / 183-1w) OX=278197 GN=PEPE_1475 PE=3 SV=1	Q03E66_PEDPA	PEPE_1475	Uniprot_Pediococcus_pentosaceus_strain_ATCC.fasta	36674	1	10	13	27	0.000587	0.382	RPGDPDSLIAASQK	R	A	0.997	55.6	25	55.6	1454.76	2236	556454	282	295
sample Treatment	2022 5:30:55 PM;File Size: 1000722054 [Byte] (F057606)	UDP-glucose 4-epimerase OS=Pediococcus pentosaceus (strain ATCC 25745 / CCUG 21536 / LMG 10740 / 183-1w) OX=278197 GN=PEPE_1475 PE=3 SV=1	Q03E66_PEDPA	PEPE_1475	Uniprot_Pediococcus_pentosaceus_strain_ATCC.fasta	36674	1	10	13	27	0.000587	0.382	SILVVGGAGYIGSHMVK	M	R	0.93	29.9	25	29.9	1687.92	3185	108832	2	18
sample Treatment	2022 5:30:55 PM;File Size: 1000722054 [Byte] (F057606)	UDP-glucose 4-epimerase OS=Pediococcus pentosaceus (strain ATCC 25745 / CCUG 21536 / LMG 10740 / 183-1w) OX=278197 GN=PEPE_1475 PE=3 SV=1	Q03E66_PEDPA	PEPE_1475	Uniprot_Pediococcus_pentosaceus_strain_ATCC.fasta	36674	1	10	13	27	0.000587	0.382	SPIEETDR	K	Q	0.99	41.1	25	41.1	946.448	1449.5	73886.2	127	134
sample Treatment	2022 5:30:55 PM;File Size: 1000722054 [Byte] (F057606)	UDP-glucose 4-epimerase OS=Pediococcus pentosaceus (strain ATCC 25745 / CCUG 21536 / LMG 10740 / 183-1w) OX=278197 GN=PEPE_1475 PE=3 SV=1	Q03E66_PEDPA	PEPE_1475	Uniprot_Pediococcus_pentosaceus_strain_ATCC.fasta	36674	1	10	13	27	0.000587	0.382	TAWNWTQK	K	H	0.964	33.1	25	33.1	1034.51	2619.5	324294	315	322
sample Treatment	2022 5:30:55 PM;File Size: 1000722054 [Byte] (F057606)	50S ribosomal protein L3 OS=Pediococcus pentosaceus (strain ATCC 25745 / CCUG 21536 / LMG 10740 / 183-1w) OX=278197 GN=rplC PE=3 SV=1	RL3_PEDPA	rplC	Uniprot_Pediococcus_pentosaceus_strain_ATCC.fasta	22745.9	1	9	13	45	0.000978	0.424	ADTENNVLLVK	K	G	0.997	104	25	92.3	1215.66	2481.5	1632550	179	189
sample Treatment	2022 5:30:55 PM;File Size: 1000722054 [Byte] (F057606)	50S ribosomal protein L3 OS=Pediococcus pentosaceus (strain ATCC 25745 / CCUG 21536 / LMG 10740 / 183-1w) OX=278197 GN=rplC PE=3 SV=1	RL3_PEDPA	rplC	Uniprot_Pediococcus_pentosaceus_strain_ATCC.fasta	22745.9	1	9	13	45	0.000978	0.424	GHGFQGVIK	K	K	0.997	51.4	25	46.7	942.516	2040	458790	117	125
sample Treatment	2022 5:30:55 PM;File Size: 1000722054 [Byte] (F057606)	50S ribosomal protein L3 OS=Pediococcus pentosaceus (strain ATCC 25745 / CCUG 21536 / LMG 10740 / 183-1w) OX=278197 GN=rplC PE=3 SV=1	RL3_PEDPA	rplC	Uniprot_Pediococcus_pentosaceus_strain_ATCC.fasta	22745.9	1	9	13	45	0.000978	0.424	KSYLVVK	K	S	0.9	33.5	25	33.5	836.524	1912	284345	197	203
sample Treatment	2022 5:30:55 PM;File Size: 1000722054 [Byte] (F057606)	50S ribosomal protein L3 OS=Pediococcus pentosaceus (strain ATCC 25745 / CCUG 21536 / LMG 10740 / 183-1w) OX=278197 GN=rplC PE=3 SV=1	RL3_PEDPA	rplC	Uniprot_Pediococcus_pentosaceus_strain_ATCC.fasta	22745.9	1	9	13	45	0.000978	0.424	NVELGDVK	R	V	0.99	47.5	25	47.5	873.468	2064.5	1427520	86	93
sample Treatment	2022 5:30:55 PM;File Size: 1000722054 [Byte] (F057606)	50S ribosomal protein L3 OS=Pediococcus pentosaceus (strain ATCC 25745 / CCUG 21536 / LMG 10740 / 183-1w) OX=278197 GN=rplC PE=3 SV=1	RL3_PEDPA	rplC	Uniprot_Pediococcus_pentosaceus_strain_ATCC.fasta	22745.9	1	9	13	45	0.000978	0.424	QVLSNKPEQGHVAK	R	A	0.996	48.5	25	48.5	1534.83	1433.5	1410960	59	72
sample Treatment	2022 5:30:55 PM;File Size: 1000722054 [Byte] (F057606)	50S ribosomal protein L3 OS=Pediococcus pentosaceus (strain ATCC 25745 / CCUG 21536 / LMG 10740 / 183-1w) OX=278197 GN=rplC PE=3 SV=1	RL3_PEDPA	rplC	Uniprot_Pediococcus_pentosaceus_strain_ATCC.fasta	22745.9	1	9	13	45	0.000978	0.424	RPGSLGAVINR	R	V	0.997	61.8	25	61.8	1139.66	2138	2532280	143	153
sample Treatment	2022 5:30:55 PM;File Size: 1000722054 [Byte] (F057606)	50S ribosomal protein L3 OS=Pediococcus pentosaceus (strain ATCC 25745 / CCUG 21536 / LMG 10740 / 183-1w) OX=278197 GN=rplC PE=3 SV=1	RL3_PEDPA	rplC	Uniprot_Pediococcus_pentosaceus_strain_ATCC.fasta	22745.9	1	9	13	45	0.000978	0.424	TVENDGYSSVQLGFDDK	K	R	0.997	110	25	110	1873.85	2871.5	105808	41	57
sample Treatment	2022 5:30:55 PM;File Size: 1000722054 [Byte] (F057606)	50S ribosomal protein L3 OS=Pediococcus pentosaceus (strain ATCC 25745 / CCUG 21536 / LMG 10740 / 183-1w) OX=278197 GN=rplC PE=3 SV=1	RL3_PEDPA	rplC	Uniprot_Pediococcus_pentosaceus_strain_ATCC.fasta	22745.9	1	9	13	45	0.000978	0.424	TVENDGYSSVQLGFDDKR	K	Q	0.997	83	25	83	2029.95	2722	1512730	41	58
sample Treatment	2022 5:30:55 PM;File Size: 1000722054 [Byte] (F057606)	50S ribosomal protein L3 OS=Pediococcus pentosaceus (strain ATCC 25745 / CCUG 21536 / LMG 10740 / 183-1w) OX=278197 GN=rplC PE=3 SV=1	RL3_PEDPA	rplC	Uniprot_Pediococcus_pentosaceus_strain_ATCC.fasta	22745.9	1	9	13	45	0.000978	0.424	TVTIQHLEIVK	K	A	0.997	72.8	25	72.8	1280.76	2759.5	2699070	168	178
sample Treatment	2022 5:30:55 PM;File Size: 1000722054 [Byte] (F057606)	UDP-N-acetylmuramate--L-alanine ligase OS=Pediococcus pentosaceus (strain ATCC 25745 / CCUG 21536 / LMG 10740 / 183-1w) OX=278197 GN=murC PE=3 SV=1	MURC_PEDPA	murC	Uniprot_Pediococcus_pentosaceus_strain_ATCC.fasta	48405.4	1	6	6	11	0.000239	0.172	EAVADNILIDDYAHHPSEIK	K	A	0.997	43.2	25	43.2	2250.1	2977	352512	305	324
sample Treatment	2022 5:30:55 PM;File Size: 1000722054 [Byte] (F057606)	UDP-N-acetylmuramate--L-alanine ligase OS=Pediococcus pentosaceus (strain ATCC 25745 / CCUG 21536 / LMG 10740 / 183-1w) OX=278197 GN=murC PE=3 SV=1	MURC_PEDPA	murC	Uniprot_Pediococcus_pentosaceus_strain_ATCC.fasta	48405.4	1	6	6	11	0.000239	0.172	EDAGAVSSQDLADK	R	I	0.997	101	25	101	1405.64	1904	133849	379	392
sample Treatment	2022 5:30:55 PM;File Size: 1000722054 [Byte] (F057606)	UDP-N-acetylmuramate--L-alanine ligase OS=Pediococcus pentosaceus (strain ATCC 25745 / CCUG 21536 / LMG 10740 / 183-1w) OX=278197 GN=murC PE=3 SV=1	MURC_PEDPA	murC	Uniprot_Pediococcus_pentosaceus_strain_ATCC.fasta	48405.4	1	6	6	11	0.000239	0.172	ELLTYQGVK	K	R	0.917	28.9	25	25.5	1050.58	2500	65771	291	299
sample Treatment	2022 5:30:55 PM;File Size: 1000722054 [Byte] (F057606)	UDP-N-acetylmuramate--L-alanine ligase OS=Pediococcus pentosaceus (strain ATCC 25745 / CCUG 21536 / LMG 10740 / 183-1w) OX=278197 GN=murC PE=3 SV=1	MURC_PEDPA	murC	Uniprot_Pediococcus_pentosaceus_strain_ATCC.fasta	48405.4	1	6	6	11	0.000239	0.172	TTTGSEFDVIHK	R	G	0.996	50.9	25	50.9	1334.66	2343.5	171411	240	251
sample Treatment	2022 5:30:55 PM;File Size: 1000722054 [Byte] (F057606)	UDP-N-acetylmuramate--L-alanine ligase OS=Pediococcus pentosaceus (strain ATCC 25745 / CCUG 21536 / LMG 10740 / 183-1w) OX=278197 GN=murC PE=3 SV=1	MURC_PEDPA	murC	Uniprot_Pediococcus_pentosaceus_strain_ATCC.fasta	48405.4	1	6	6	11	0.000239	0.172	VDLDLVQK	K	E	0.989	40.4	25	38.1	929.53	2582	92226.1	283	290
sample Treatment	2022 5:30:55 PM;File Size: 1000722054 [Byte] (F057606)	UDP-N-acetylmuramate--L-alanine ligase OS=Pediococcus pentosaceus (strain ATCC 25745 / CCUG 21536 / LMG 10740 / 183-1w) OX=278197 GN=murC PE=3 SV=1	MURC_PEDPA	murC	Uniprot_Pediococcus_pentosaceus_strain_ATCC.fasta	48405.4	1	6	6	11	0.000239	0.172	YTSIGVAGTHGK	K	T	0.989	41.1	25	41.1	1190.62	1736	125131	104	115
sample Treatment	2022 5:30:55 PM;File Size: 1000722054 [Byte] (F057606)	Trigger factor OS=Pediococcus pentosaceus (strain ATCC 25745 / CCUG 21536 / LMG 10740 / 183-1w) OX=278197 GN=tig PE=3 SV=1	TIG_PEDPA	tig	Uniprot_Pediococcus_pentosaceus_strain_ATCC.fasta	48386.2	1	18	22	66	0.00143	0.446	DLAEQYGMEEK	K	A	0.997	64.4	25	64.4	1312.57	2374.5	934275	386	396
sample Treatment	2022 5:30:55 PM;File Size: 1000722054 [Byte] (F057606)	Trigger factor OS=Pediococcus pentosaceus (strain ATCC 25745 / CCUG 21536 / LMG 10740 / 183-1w) OX=278197 GN=tig PE=3 SV=1	TIG_PEDPA	tig	Uniprot_Pediococcus_pentosaceus_strain_ATCC.fasta	48386.2	1	18	22	66	0.00143	0.446	DSAIEEPK	K	S	0.99	43.5	25	43.5	888.431	1551.5	1128340	422	429
sample Treatment	2022 5:30:55 PM;File Size: 1000722054 [Byte] (F057606)	Trigger factor OS=Pediococcus pentosaceus (strain ATCC 25745 / CCUG 21536 / LMG 10740 / 183-1w) OX=278197 GN=tig PE=3 SV=1	TIG_PEDPA	tig	Uniprot_Pediococcus_pentosaceus_strain_ATCC.fasta	48386.2	1	18	22	66	0.00143	0.446	DVDEDVDSLEDLK	K	V	0.997	59.2	25	59.2	1491.67	3072.5	576516	257	269
sample Treatment	2022 5:30:55 PM;File Size: 1000722054 [Byte] (F057606)	Trigger factor OS=Pediococcus pentosaceus (strain ATCC 25745 / CCUG 21536 / LMG 10740 / 183-1w) OX=278197 GN=tig PE=3 SV=1	TIG_PEDPA	tig	Uniprot_Pediococcus_pentosaceus_strain_ATCC.fasta	48386.2	1	18	22	66	0.00143	0.446	EAGIEPVDQPQVDVESMEK	K	G	0.997	92.2	25	92.2	2099.98	2884.5	1035310	82	100
sample Treatment	2022 5:30:55 PM;File Size: 1000722054 [Byte] (F057606)	Trigger factor OS=Pediococcus pentosaceus (strain ATCC 25745 / CCUG 21536 / LMG 10740 / 183-1w) OX=278197 GN=tig PE=3 SV=1	TIG_PEDPA	tig	Uniprot_Pediococcus_pentosaceus_strain_ATCC.fasta	48386.2	1	18	22	66	0.00143	0.446	ELPELDDEFAK	K	D	0.971	34.2	25	34.2	1305.62	3047.5	462729	246	256
sample Treatment	2022 5:30:55 PM;File Size: 1000722054 [Byte] (F057606)	Trigger factor OS=Pediococcus pentosaceus (strain ATCC 25745 / CCUG 21536 / LMG 10740 / 183-1w) OX=278197 GN=tig PE=3 SV=1	TIG_PEDPA	tig	Uniprot_Pediococcus_pentosaceus_strain_ATCC.fasta	48386.2	1	18	22	66	0.00143	0.446	EQQAELVLK	R	E	0.997	67.4	25	58.9	1057.59	2291	2149610	147	155
sample Treatment	2022 5:30:55 PM;File Size: 1000722054 [Byte] (F057606)	Trigger factor OS=Pediococcus pentosaceus (strain ATCC 25745 / CCUG 21536 / LMG 10740 / 183-1w) OX=278197 GN=tig PE=3 SV=1	TIG_PEDPA	tig	Uniprot_Pediococcus_pentosaceus_strain_ATCC.fasta	48386.2	1	18	22	66	0.00143	0.446	ETEAVQAAVDNAEIAEIPEAMLNEDVDR	K	Q	0.997	69.7	25	69.7	3058.42	3533	84781.3	289	316
sample Treatment	2022 5:30:55 PM;File Size: 1000722054 [Byte] (F057606)	Trigger factor OS=Pediococcus pentosaceus (strain ATCC 25745 / CCUG 21536 / LMG 10740 / 183-1w) OX=278197 GN=tig PE=3 SV=1	TIG_PEDPA	tig	Uniprot_Pediococcus_pentosaceus_strain_ATCC.fasta	48386.2	1	18	22	66	0.00143	0.446	EVDEEIEK	K	K	0.99	46.2	25	46.2	990.463	1637	666248	137	144
sample Treatment	2022 5:30:55 PM;File Size: 1000722054 [Byte] (F057606)	Trigger factor OS=Pediococcus pentosaceus (strain ATCC 25745 / CCUG 21536 / LMG 10740 / 183-1w) OX=278197 GN=tig PE=3 SV=1	TIG_PEDPA	tig	Uniprot_Pediococcus_pentosaceus_strain_ATCC.fasta	48386.2	1	18	22	66	0.00143	0.446	GEAWVLSAIVTVKPEVK	K	L	0.997	78.9	25	78.9	1826.04	3818	1938960	101	117
sample Treatment	2022 5:30:55 PM;File Size: 1000722054 [Byte] (F057606)	Trigger factor OS=Pediococcus pentosaceus (strain ATCC 25745 / CCUG 21536 / LMG 10740 / 183-1w) OX=278197 GN=tig PE=3 SV=1	TIG_PEDPA	tig	Uniprot_Pediococcus_pentosaceus_strain_ATCC.fasta	48386.2	1	18	22	66	0.00143	0.446	IDPSDDEVAAEIK	K	D	0.997	92.4	25	92.4	1401.67	2475.5	1087090	373	385
sample Treatment	2022 5:30:55 PM;File Size: 1000722054 [Byte] (F057606)	Trigger factor OS=Pediococcus pentosaceus (strain ATCC 25745 / CCUG 21536 / LMG 10740 / 183-1w) OX=278197 GN=tig PE=3 SV=1	TIG_PEDPA	tig	Uniprot_Pediococcus_pentosaceus_strain_ATCC.fasta	48386.2	1	18	22	66	0.00143	0.446	KIQAASDAK	R	E	0.992	43.3	25	39.8	931.521	871.5	33125.2	280	288
sample Treatment	2022 5:30:55 PM;File Size: 1000722054 [Byte] (F057606)	Trigger factor OS=Pediococcus pentosaceus (strain ATCC 25745 / CCUG 21536 / LMG 10740 / 183-1w) OX=278197 GN=tig PE=3 SV=1	TIG_PEDPA	tig	Uniprot_Pediococcus_pentosaceus_strain_ATCC.fasta	48386.2	1	18	22	66	0.00143	0.446	LTFEVGTDK	K	I	0.996	49.1	25	49.1	1009.52	2541.5	2500090	15	23
sample Treatment	2022 5:30:55 PM;File Size: 1000722054 [Byte] (F057606)	Trigger factor OS=Pediococcus pentosaceus (strain ATCC 25745 / CCUG 21536 / LMG 10740 / 183-1w) OX=278197 GN=tig PE=3 SV=1	TIG_PEDPA	tig	Uniprot_Pediococcus_pentosaceus_strain_ATCC.fasta	48386.2	1	18	22	66	0.00143	0.446	QLNVPGFR	K	K	0.94	30.4	25	30.4	930.516	2773.5	2363250	38	45
sample Treatment	2022 5:30:55 PM;File Size: 1000722054 [Byte] (F057606)	Trigger factor OS=Pediococcus pentosaceus (strain ATCC 25745 / CCUG 21536 / LMG 10740 / 183-1w) OX=278197 GN=tig PE=3 SV=1	TIG_PEDPA	tig	Uniprot_Pediococcus_pentosaceus_strain_ATCC.fasta	48386.2	1	18	22	66	0.00143	0.446	SALSEDMIK	R	H	0.994	45.3	25	45.3	993.492	2448	1045970	400	408
sample Treatment	2022 5:30:55 PM;File Size: 1000722054 [Byte] (F057606)	Trigger factor OS=Pediococcus pentosaceus (strain ATCC 25745 / CCUG 21536 / LMG 10740 / 183-1w) OX=278197 GN=tig PE=3 SV=1	TIG_PEDPA	tig	Uniprot_Pediococcus_pentosaceus_strain_ATCC.fasta	48386.2	1	18	22	66	0.00143	0.446	SAVELIK	K	D	0.9	37.8	25	24.7	759.461	2260	833059	415	421
sample Treatment	2022 5:30:55 PM;File Size: 1000722054 [Byte] (F057606)	Trigger factor OS=Pediococcus pentosaceus (strain ATCC 25745 / CCUG 21536 / LMG 10740 / 183-1w) OX=278197 GN=tig PE=3 SV=1	TIG_PEDPA	tig	Uniprot_Pediococcus_pentosaceus_strain_ATCC.fasta	48386.2	1	18	22	66	0.00143	0.446	SAVELIKDSAIEEPK	K	S	0.972	34.7	25	34.7	1628.87	2799	56685.4	415	429
sample Treatment	2022 5:30:55 PM;File Size: 1000722054 [Byte] (F057606)	Trigger factor OS=Pediococcus pentosaceus (strain ATCC 25745 / CCUG 21536 / LMG 10740 / 183-1w) OX=278197 GN=tig PE=3 SV=1	TIG_PEDPA	tig	Uniprot_Pediococcus_pentosaceus_strain_ATCC.fasta	48386.2	1	18	22	66	0.00143	0.446	TKELPELDDEFAK	K	D	0.952	31.8	25	31.8	1534.76	2805	201624	244	256
sample Treatment	2022 5:30:55 PM;File Size: 1000722054 [Byte] (F057606)	Trigger factor OS=Pediococcus pentosaceus (strain ATCC 25745 / CCUG 21536 / LMG 10740 / 183-1w) OX=278197 GN=tig PE=3 SV=1	TIG_PEDPA	tig	Uniprot_Pediococcus_pentosaceus_strain_ATCC.fasta	48386.2	1	18	22	66	0.00143	0.446	TTLVLEAIVEAEK	K	I	0.997	64.4	25	63.6	1415.8	3843.5	210098	360	372
sample Treatment	2022 5:30:55 PM;File Size: 1000722054 [Byte] (F057606)	Dipeptidase OS=Pediococcus pentosaceus (strain ATCC 25745 / CCUG 21536 / LMG 10740 / 183-1w) OX=278197 GN=PEPE_0170 PE=3 SV=1	Q03HP5_PEDPA	PEPE_0170	Uniprot_Pediococcus_pentosaceus_strain_ATCC.fasta	54237.9	1	2	2	4	8.7e-05	0.0611	AASLDGATYISR	K	N	0.996	48.4	25	48.4	1224.62	2377	124336	18	29
sample Treatment	2022 5:30:55 PM;File Size: 1000722054 [Byte] (F057606)	Dipeptidase OS=Pediococcus pentosaceus (strain ATCC 25745 / CCUG 21536 / LMG 10740 / 183-1w) OX=278197 GN=PEPE_0170 PE=3 SV=1	Q03HP5_PEDPA	PEPE_0170	Uniprot_Pediococcus_pentosaceus_strain_ATCC.fasta	54237.9	1	2	2	4	8.7e-05	0.0611	HIFGTDTEKDHHYNTPR	R	V	0.997	38.1	25	38.1	2067.96	1810	120337	234	250
sample Treatment	2022 5:30:55 PM;File Size: 1000722054 [Byte] (F057606)	Transcriptional regulator OS=Pediococcus pentosaceus (strain ATCC 25745 / CCUG 21536 / LMG 10740 / 183-1w) OX=278197 GN=PEPE_0957 PE=3 SV=1	Q03FK9_PEDPA	PEPE_0957	Uniprot_Pediococcus_pentosaceus_strain_ATCC.fasta	36907.9	0.982	2	2	3	6.52e-05	0.0743	ILNHATDEIQQATSSGR	R	G	0.933	30.1	25	30.1	1840.91	2394	154218	82	98
sample Treatment	2022 5:30:55 PM;File Size: 1000722054 [Byte] (F057606)	Transcriptional regulator OS=Pediococcus pentosaceus (strain ATCC 25745 / CCUG 21536 / LMG 10740 / 183-1w) OX=278197 GN=PEPE_0957 PE=3 SV=1	Q03FK9_PEDPA	PEPE_0957	Uniprot_Pediococcus_pentosaceus_strain_ATCC.fasta	36907.9	0.982	2	2	3	6.52e-05	0.0743	TLSYFLR	K	L	0.9	30.5	25	30.5	899.499	3025	45806.9	13	19
sample Treatment	2022 5:30:55 PM;File Size: 1000722054 [Byte] (F057606)	Uncharacterized protein OS=Pediococcus pentosaceus (strain ATCC 25745 / CCUG 21536 / LMG 10740 / 183-1w) OX=278197 GN=PEPE_1596 PE=4 SV=1	Q03DV5_PEDPA	PEPE_1596	Uniprot_Pediococcus_pentosaceus_strain_ATCC.fasta	28587.1	0.95	1	1	2	4.35e-05	0.063	ITETTTQEIYSVSPSK	K	Q	0.997	72.8	25	72.8	1783.9	2519	41562.5	57	72
sample Treatment	2022 5:30:55 PM;File Size: 1000722054 [Byte] (F057606)	Diacylglycerol kinase OS=Pediococcus pentosaceus (strain ATCC 25745 / CCUG 21536 / LMG 10740 / 183-1w) OX=278197 GN=PEPE_1367 PE=3 SV=1	Q03EG7_PEDPA	PEPE_1367	Uniprot_Pediococcus_pentosaceus_strain_ATCC.fasta	37118	1	4	4	6	0.00013	0.153	AGYETSAFATTPEPDSAK	K	N	0.997	69.4	25	69.4	1842.84	2434.5	54227.7	32	49
sample Treatment	2022 5:30:55 PM;File Size: 1000722054 [Byte] (F057606)	Diacylglycerol kinase OS=Pediococcus pentosaceus (strain ATCC 25745 / CCUG 21536 / LMG 10740 / 183-1w) OX=278197 GN=PEPE_1367 PE=3 SV=1	Q03EG7_PEDPA	PEPE_1367	Uniprot_Pediococcus_pentosaceus_strain_ATCC.fasta	37118	1	4	4	6	0.00013	0.153	GAELLPR	K	V	0.9	33.8	25	29	755.441	2169	28975.2	168	174
sample Treatment	2022 5:30:55 PM;File Size: 1000722054 [Byte] (F057606)	Diacylglycerol kinase OS=Pediococcus pentosaceus (strain ATCC 25745 / CCUG 21536 / LMG 10740 / 183-1w) OX=278197 GN=PEPE_1367 PE=3 SV=1	Q03EG7_PEDPA	PEPE_1367	Uniprot_Pediococcus_pentosaceus_strain_ATCC.fasta	37118	1	4	4	6	0.00013	0.153	QHLVEILAVIEK	K	A	0.997	56	25	56	1391.83	3574	38033.9	20	31
sample Treatment	2022 5:30:55 PM;File Size: 1000722054 [Byte] (F057606)	Diacylglycerol kinase OS=Pediococcus pentosaceus (strain ATCC 25745 / CCUG 21536 / LMG 10740 / 183-1w) OX=278197 GN=PEPE_1367 PE=3 SV=1	Q03EG7_PEDPA	PEPE_1367	Uniprot_Pediococcus_pentosaceus_strain_ATCC.fasta	37118	1	4	4	6	0.00013	0.153	VKPVEMDIEYDGER	R	Y	0.995	49.2	25	49.2	1679.79	2594	151657	175	188
sample Treatment	2022 5:30:55 PM;File Size: 1000722054 [Byte] (F057606)	Phosphoglycerol transferase related protein, alkaline phosphatase superfamily OS=Pediococcus pentosaceus (strain ATCC 25745 / CCUG 21536 / LMG 10740 / 183-1w) OX=278197 GN=PEPE_0367 PE=3 SV=1	Q03H59_PEDPA	PEPE_0367	Uniprot_Pediococcus_pentosaceus_strain_ATCC.fasta	81693.8	1	4	4	7	0.000152	0.0808	LYDSSGNEITDPNTTFK	K	K	0.997	90.4	25	90.4	1901.88	2614	59306.5	597	613
sample Treatment	2022 5:30:55 PM;File Size: 1000722054 [Byte] (F057606)	Phosphoglycerol transferase related protein, alkaline phosphatase superfamily OS=Pediococcus pentosaceus (strain ATCC 25745 / CCUG 21536 / LMG 10740 / 183-1w) OX=278197 GN=PEPE_0367 PE=3 SV=1	Q03H59_PEDPA	PEPE_0367	Uniprot_Pediococcus_pentosaceus_strain_ATCC.fasta	81693.8	1	4	4	7	0.000152	0.0808	NNDYVTPTYSSIGGK	R	L	0.997	55.1	25	55.1	1615.76	2438	77636.5	582	596
sample Treatment	2022 5:30:55 PM;File Size: 1000722054 [Byte] (F057606)	Phosphoglycerol transferase related protein, alkaline phosphatase superfamily OS=Pediococcus pentosaceus (strain ATCC 25745 / CCUG 21536 / LMG 10740 / 183-1w) OX=278197 GN=PEPE_0367 PE=3 SV=1	Q03H59_PEDPA	PEPE_0367	Uniprot_Pediococcus_pentosaceus_strain_ATCC.fasta	81693.8	1	4	4	7	0.000152	0.0808	NYIQFGTDLLSK	K	Q	0.962	32.8	25	32.8	1398.73	3531	57625.5	561	572
sample Treatment	2022 5:30:55 PM;File Size: 1000722054 [Byte] (F057606)	Phosphoglycerol transferase related protein, alkaline phosphatase superfamily OS=Pediococcus pentosaceus (strain ATCC 25745 / CCUG 21536 / LMG 10740 / 183-1w) OX=278197 GN=PEPE_0367 PE=3 SV=1	Q03H59_PEDPA	PEPE_0367	Uniprot_Pediococcus_pentosaceus_strain_ATCC.fasta	81693.8	1	4	4	7	0.000152	0.0808	VNSANYNYSDGLTK	K	A	0.997	88.3	25	88.3	1545.72	2215.5	71270.6	650	663
sample Treatment	2022 5:30:55 PM;File Size: 1000722054 [Byte] (F057606)	Aspartyl/glutamyl-tRNA(Asn/Gln) amidotransferase subunit B OS=Pediococcus pentosaceus (strain ATCC 25745 / CCUG 21536 / LMG 10740 / 183-1w) OX=278197 GN=gatB PE=3 SV=1	GATB_PEDPA	gatB	Uniprot_Pediococcus_pentosaceus_strain_ATCC.fasta	53366.6	1	11	13	25	0.000543	0.303	AITQGEEPTSWVK	K	A	0.995	46.3	25	46.3	1445.73	2662	212187	393	405
sample Treatment	2022 5:30:55 PM;File Size: 1000722054 [Byte] (F057606)	Aspartyl/glutamyl-tRNA(Asn/Gln) amidotransferase subunit B OS=Pediococcus pentosaceus (strain ATCC 25745 / CCUG 21536 / LMG 10740 / 183-1w) OX=278197 GN=gatB PE=3 SV=1	GATB_PEDPA	gatB	Uniprot_Pediococcus_pentosaceus_strain_ATCC.fasta	53366.6	1	11	13	25	0.000543	0.303	AVGFLVGQIMK	R	Q	0.993	43.6	25	43.6	1162.67	3310	489487	443	453
sample Treatment	2022 5:30:55 PM;File Size: 1000722054 [Byte] (F057606)	Aspartyl/glutamyl-tRNA(Asn/Gln) amidotransferase subunit B OS=Pediococcus pentosaceus (strain ATCC 25745 / CCUG 21536 / LMG 10740 / 183-1w) OX=278197 GN=gatB PE=3 SV=1	GATB_PEDPA	gatB	Uniprot_Pediococcus_pentosaceus_strain_ATCC.fasta	53366.6	1	11	13	25	0.000543	0.303	EMSDFFEATVAQGADPK	K	L	0.997	55.7	25	55.7	1842.82	3335.5	91762.9	323	339
sample Treatment	2022 5:30:55 PM;File Size: 1000722054 [Byte] (F057606)	Aspartyl/glutamyl-tRNA(Asn/Gln) amidotransferase subunit B OS=Pediococcus pentosaceus (strain ATCC 25745 / CCUG 21536 / LMG 10740 / 183-1w) OX=278197 GN=gatB PE=3 SV=1	GATB_PEDPA	gatB	Uniprot_Pediococcus_pentosaceus_strain_ATCC.fasta	53366.6	1	11	13	25	0.000543	0.303	KGLAFEEK	R	R	0.99	50.8	25	33.6	921.504	1929.5	143491	223	230
sample Treatment	2022 5:30:55 PM;File Size: 1000722054 [Byte] (F057606)	Aspartyl/glutamyl-tRNA(Asn/Gln) amidotransferase subunit B OS=Pediococcus pentosaceus (strain ATCC 25745 / CCUG 21536 / LMG 10740 / 183-1w) OX=278197 GN=gatB PE=3 SV=1	GATB_PEDPA	gatB	Uniprot_Pediococcus_pentosaceus_strain_ATCC.fasta	53366.6	1	11	13	25	0.000543	0.303	LTANYLMGDVNAYLNDQK	K	V	0.997	76.3	25	76.3	2042.99	3791.5	83382.9	340	357
sample Treatment	2022 5:30:55 PM;File Size: 1000722054 [Byte] (F057606)	Aspartyl/glutamyl-tRNA(Asn/Gln) amidotransferase subunit B OS=Pediococcus pentosaceus (strain ATCC 25745 / CCUG 21536 / LMG 10740 / 183-1w) OX=278197 GN=gatB PE=3 SV=1	GATB_PEDPA	gatB	Uniprot_Pediococcus_pentosaceus_strain_ATCC.fasta	53366.6	1	11	13	25	0.000543	0.303	LTPEHLASMVK	K	M	0.969	34.1	25	34.1	1225.66	2609	170402	365	375
sample Treatment	2022 5:30:55 PM;File Size: 1000722054 [Byte] (F057606)	Aspartyl/glutamyl-tRNA(Asn/Gln) amidotransferase subunit B OS=Pediococcus pentosaceus (strain ATCC 25745 / CCUG 21536 / LMG 10740 / 183-1w) OX=278197 GN=gatB PE=3 SV=1	GATB_PEDPA	gatB	Uniprot_Pediococcus_pentosaceus_strain_ATCC.fasta	53366.6	1	11	13	25	0.000543	0.303	MITDETISSK	K	M	0.997	67.8	25	67.8	1124.55	2055.5	380658	376	385
sample Treatment	2022 5:30:55 PM;File Size: 1000722054 [Byte] (F057606)	Aspartyl/glutamyl-tRNA(Asn/Gln) amidotransferase subunit B OS=Pediococcus pentosaceus (strain ATCC 25745 / CCUG 21536 / LMG 10740 / 183-1w) OX=278197 GN=gatB PE=3 SV=1	GATB_PEDPA	gatB	Uniprot_Pediococcus_pentosaceus_strain_ATCC.fasta	53366.6	1	11	13	25	0.000543	0.303	NINSFNFVR	K	K	0.952	31.5	25	31.5	1110.57	2972.5	411931	214	222
sample Treatment	2022 5:30:55 PM;File Size: 1000722054 [Byte] (F057606)	Aspartyl/glutamyl-tRNA(Asn/Gln) amidotransferase subunit B OS=Pediococcus pentosaceus (strain ATCC 25745 / CCUG 21536 / LMG 10740 / 183-1w) OX=278197 GN=gatB PE=3 SV=1	GATB_PEDPA	gatB	Uniprot_Pediococcus_pentosaceus_strain_ATCC.fasta	53366.6	1	11	13	25	0.000543	0.303	VDVNISIRPLGSEK	R	F	0.997	54.1	25	54.1	1526.85	2884.5	736975	192	205
sample Treatment	2022 5:30:55 PM;File Size: 1000722054 [Byte] (F057606)	Aspartyl/glutamyl-tRNA(Asn/Gln) amidotransferase subunit B OS=Pediococcus pentosaceus (strain ATCC 25745 / CCUG 21536 / LMG 10740 / 183-1w) OX=278197 GN=gatB PE=3 SV=1	GATB_PEDPA	gatB	Uniprot_Pediococcus_pentosaceus_strain_ATCC.fasta	53366.6	1	11	13	25	0.000543	0.303	VGIAEMHIEEDAGK	K	N	0.997	59.8	25	59.8	1498.72	2553.5	64434.4	116	129
sample Treatment	2022 5:30:55 PM;File Size: 1000722054 [Byte] (F057606)	Aspartyl/glutamyl-tRNA(Asn/Gln) amidotransferase subunit B OS=Pediococcus pentosaceus (strain ATCC 25745 / CCUG 21536 / LMG 10740 / 183-1w) OX=278197 GN=gatB PE=3 SV=1	GATB_PEDPA	gatB	Uniprot_Pediococcus_pentosaceus_strain_ATCC.fasta	53366.6	1	11	13	25	0.000543	0.303	YVEELGLTDYDAMVLTQTK	R	E	0.965	33.2	25	33.2	2189.07	3678	14635.2	304	322
sample Treatment	2022 5:30:55 PM;File Size: 1000722054 [Byte] (F057606)	Transcription termination/antitermination protein NusG OS=Pediococcus pentosaceus (strain ATCC 25745 / CCUG 21536 / LMG 10740 / 183-1w) OX=278197 GN=nusG PE=3 SV=1	Q03E47_PEDPA	nusG	Uniprot_Pediococcus_pentosaceus_strain_ATCC.fasta	20520.1	1	3	4	9	0.000196	0.293	HADIEVEVGELVK	R	I	0.997	57.1	25	57.1	1437.76	3159.5	122123	122	134
sample Treatment	2022 5:30:55 PM;File Size: 1000722054 [Byte] (F057606)	Transcription termination/antitermination protein NusG OS=Pediococcus pentosaceus (strain ATCC 25745 / CCUG 21536 / LMG 10740 / 183-1w) OX=278197 GN=nusG PE=3 SV=1	Q03E47_PEDPA	nusG	Uniprot_Pediococcus_pentosaceus_strain_ATCC.fasta	20520.1	1	3	4	9	0.000196	0.293	NTPGVTGFIGSHGSGSKPTPLLPDEVER	R	I	0.994	33.3	25	33.3	2849.44	3061	640182	84	111
sample Treatment	2022 5:30:55 PM;File Size: 1000722054 [Byte] (F057606)	Transcription termination/antitermination protein NusG OS=Pediococcus pentosaceus (strain ATCC 25745 / CCUG 21536 / LMG 10740 / 183-1w) OX=278197 GN=nusG PE=3 SV=1	Q03E47_PEDPA	nusG	Uniprot_Pediococcus_pentosaceus_strain_ATCC.fasta	20520.1	1	3	4	9	0.000196	0.293	VVVPEEEEVETK	R	N	0.997	62.2	25	62.2	1386.7	2258	300258	41	52
sample Treatment	2022 5:30:55 PM;File Size: 1000722054 [Byte] (F057606)	Aspartate--tRNA ligase OS=Pediococcus pentosaceus (strain ATCC 25745 / CCUG 21536 / LMG 10740 / 183-1w) OX=278197 GN=aspS PE=3 SV=1	SYD_PEDPA	aspS	Uniprot_Pediococcus_pentosaceus_strain_ATCC.fasta	67138.8	1	12	12	22	0.000478	0.287	AIAVPDGANNLSR	K	K	0.995	47	25	47	1297.69	2379	244522	324	336
sample Treatment	2022 5:30:55 PM;File Size: 1000722054 [Byte] (F057606)	Aspartate--tRNA ligase OS=Pediococcus pentosaceus (strain ATCC 25745 / CCUG 21536 / LMG 10740 / 183-1w) OX=278197 GN=aspS PE=3 SV=1	SYD_PEDPA	aspS	Uniprot_Pediococcus_pentosaceus_strain_ATCC.fasta	67138.8	1	12	12	22	0.000478	0.287	DISSIVADSEFK	K	V	0.995	47	25	47	1310.65	3204.5	302465	299	310
sample Treatment	2022 5:30:55 PM;File Size: 1000722054 [Byte] (F057606)	Aspartate--tRNA ligase OS=Pediococcus pentosaceus (strain ATCC 25745 / CCUG 21536 / LMG 10740 / 183-1w) OX=278197 GN=aspS PE=3 SV=1	SYD_PEDPA	aspS	Uniprot_Pediococcus_pentosaceus_strain_ATCC.fasta	67138.8	1	12	12	22	0.000478	0.287	FGTDQPDVR	R	F	0.993	43.7	25	43.7	1034.49	1828	281400	284	292
sample Treatment	2022 5:30:55 PM;File Size: 1000722054 [Byte] (F057606)	Aspartate--tRNA ligase OS=Pediococcus pentosaceus (strain ATCC 25745 / CCUG 21536 / LMG 10740 / 183-1w) OX=278197 GN=aspS PE=3 SV=1	SYD_PEDPA	aspS	Uniprot_Pediococcus_pentosaceus_strain_ATCC.fasta	67138.8	1	12	12	22	0.000478	0.287	ITDDGFSGPVAK	K	F	0.997	54.5	25	54.5	1206.6	2245.5	231979	359	370
sample Treatment	2022 5:30:55 PM;File Size: 1000722054 [Byte] (F057606)	Aspartate--tRNA ligase OS=Pediococcus pentosaceus (strain ATCC 25745 / CCUG 21536 / LMG 10740 / 183-1w) OX=278197 GN=aspS PE=3 SV=1	SYD_PEDPA	aspS	Uniprot_Pediococcus_pentosaceus_strain_ATCC.fasta	67138.8	1	12	12	22	0.000478	0.287	ITQAVHSYLDEQGFLDIETPDLTK	R	S	0.971	34.5	25	34.5	2733.36	3690	91364.3	148	171
sample Treatment	2022 5:30:55 PM;File Size: 1000722054 [Byte] (F057606)	Aspartate--tRNA ligase OS=Pediococcus pentosaceus (strain ATCC 25745 / CCUG 21536 / LMG 10740 / 183-1w) OX=278197 GN=aspS PE=3 SV=1	SYD_PEDPA	aspS	Uniprot_Pediococcus_pentosaceus_strain_ATCC.fasta	67138.8	1	12	12	22	0.000478	0.287	RDLGQLIFIDLR	R	D	0.933	30.1	25	30.1	1458.84	3854	33715.5	29	40
sample Treatment	2022 5:30:55 PM;File Size: 1000722054 [Byte] (F057606)	Aspartate--tRNA ligase OS=Pediococcus pentosaceus (strain ATCC 25745 / CCUG 21536 / LMG 10740 / 183-1w) OX=278197 GN=aspS PE=3 SV=1	SYD_PEDPA	aspS	Uniprot_Pediococcus_pentosaceus_strain_ATCC.fasta	67138.8	1	12	12	22	0.000478	0.287	TGQIEVEVQQAK	K	I	0.997	86.9	25	73.9	1329.7	2178	150085	91	102
sample Treatment	2022 5:30:55 PM;File Size: 1000722054 [Byte] (F057606)	Aspartate--tRNA ligase OS=Pediococcus pentosaceus (strain ATCC 25745 / CCUG 21536 / LMG 10740 / 183-1w) OX=278197 GN=aspS PE=3 SV=1	SYD_PEDPA	aspS	Uniprot_Pediococcus_pentosaceus_strain_ATCC.fasta	67138.8	1	12	12	22	0.000478	0.287	TPPFDIEDGVSASDELK	K	M	0.997	68.6	25	68.6	1819.86	3226.5	102325	109	125
sample Treatment	2022 5:30:55 PM;File Size: 1000722054 [Byte] (F057606)	Aspartate--tRNA ligase OS=Pediococcus pentosaceus (strain ATCC 25745 / CCUG 21536 / LMG 10740 / 183-1w) OX=278197 GN=aspS PE=3 SV=1	SYD_PEDPA	aspS	Uniprot_Pediococcus_pentosaceus_strain_ATCC.fasta	67138.8	1	12	12	22	0.000478	0.287	TTYAGLVNEQYTGQTVTLK	R	G	0.997	96.7	25	96.7	2087.07	3005	48787.4	4	22
sample Treatment	2022 5:30:55 PM;File Size: 1000722054 [Byte] (F057606)	Aspartate--tRNA ligase OS=Pediococcus pentosaceus (strain ATCC 25745 / CCUG 21536 / LMG 10740 / 183-1w) OX=278197 GN=aspS PE=3 SV=1	SYD_PEDPA	aspS	Uniprot_Pediococcus_pentosaceus_strain_ATCC.fasta	67138.8	1	12	12	22	0.000478	0.287	VFSGAVANGGVVK	K	A	0.995	47.6	25	47.6	1204.67	2267	102030	311	323
sample Treatment	2022 5:30:55 PM;File Size: 1000722054 [Byte] (F057606)	Aspartate--tRNA ligase OS=Pediococcus pentosaceus (strain ATCC 25745 / CCUG 21536 / LMG 10740 / 183-1w) OX=278197 GN=aspS PE=3 SV=1	SYD_PEDPA	aspS	Uniprot_Pediococcus_pentosaceus_strain_ATCC.fasta	67138.8	1	12	12	22	0.000478	0.287	VVGDTLGYLR	K	V	0.984	37.9	25	26.2	1092.6	2772.5	309493	401	410
sample Treatment	2022 5:30:55 PM;File Size: 1000722054 [Byte] (F057606)	Aspartate--tRNA ligase OS=Pediococcus pentosaceus (strain ATCC 25745 / CCUG 21536 / LMG 10740 / 183-1w) OX=278197 GN=aspS PE=3 SV=1	SYD_PEDPA	aspS	Uniprot_Pediococcus_pentosaceus_strain_ATCC.fasta	67138.8	1	12	12	22	0.000478	0.287	VYPGHFYALPQSPQLFK	R	Q	0.996	51.7	25	51.7	1992.04	3439	140859	186	202
sample Treatment	2022 5:30:55 PM;File Size: 1000722054 [Byte] (F057606)	Glycine--tRNA ligase beta subunit OS=Pediococcus pentosaceus (strain ATCC 25745 / CCUG 21536 / LMG 10740 / 183-1w) OX=278197 GN=glyS PE=3 SV=1	SYGB_PEDPA	glyS	Uniprot_Pediococcus_pentosaceus_strain_ATCC.fasta	78150	1	10	10	14	0.000304	0.194	DWQLDLNQFK	R	S	0.899	28	25	28	1306.64	3560	95722.6	494	503
sample Treatment	2022 5:30:55 PM;File Size: 1000722054 [Byte] (F057606)	Glycine--tRNA ligase beta subunit OS=Pediococcus pentosaceus (strain ATCC 25745 / CCUG 21536 / LMG 10740 / 183-1w) OX=278197 GN=glyS PE=3 SV=1	SYGB_PEDPA	glyS	Uniprot_Pediococcus_pentosaceus_strain_ATCC.fasta	78150	1	10	10	14	0.000304	0.194	FLGEAVELANAEEYEAK	R	L	0.997	80.4	25	80.4	1882.91	3287	35969.8	189	205
sample Treatment	2022 5:30:55 PM;File Size: 1000722054 [Byte] (F057606)	Glycine--tRNA ligase beta subunit OS=Pediococcus pentosaceus (strain ATCC 25745 / CCUG 21536 / LMG 10740 / 183-1w) OX=278197 GN=glyS PE=3 SV=1	SYGB_PEDPA	glyS	Uniprot_Pediococcus_pentosaceus_strain_ATCC.fasta	78150	1	10	10	14	0.000304	0.194	HAYGIVR	R	I	0.9	29.2	25	29.2	815.452	1668	75115.7	482	488
sample Treatment	2022 5:30:55 PM;File Size: 1000722054 [Byte] (F057606)	Glycine--tRNA ligase beta subunit OS=Pediococcus pentosaceus (strain ATCC 25745 / CCUG 21536 / LMG 10740 / 183-1w) OX=278197 GN=glyS PE=3 SV=1	SYGB_PEDPA	glyS	Uniprot_Pediococcus_pentosaceus_strain_ATCC.fasta	78150	1	10	10	14	0.000304	0.194	IGDLTNVLVK	K	-	0.993	43.8	25	43.8	1071.64	2985	178584	681	690
sample Treatment	2022 5:30:55 PM;File Size: 1000722054 [Byte] (F057606)	Glycine--tRNA ligase beta subunit OS=Pediococcus pentosaceus (strain ATCC 25745 / CCUG 21536 / LMG 10740 / 183-1w) OX=278197 GN=glyS PE=3 SV=1	SYGB_PEDPA	glyS	Uniprot_Pediococcus_pentosaceus_strain_ATCC.fasta	78150	1	10	10	14	0.000304	0.194	INGLGDQQPDIEEDAK	R	G	0.952	31.5	25	31.5	1741.82	2427	22050.5	57	72
sample Treatment	2022 5:30:55 PM;File Size: 1000722054 [Byte] (F057606)	Glycine--tRNA ligase beta subunit OS=Pediococcus pentosaceus (strain ATCC 25745 / CCUG 21536 / LMG 10740 / 183-1w) OX=278197 GN=glyS PE=3 SV=1	SYGB_PEDPA	glyS	Uniprot_Pediococcus_pentosaceus_strain_ATCC.fasta	78150	1	10	10	14	0.000304	0.194	LEDAAFFYEEDQKHDINYYVDR	R	L	0.994	33.2	25	33.2	2780.25	3195	72922	323	344
sample Treatment	2022 5:30:55 PM;File Size: 1000722054 [Byte] (F057606)	Glycine--tRNA ligase beta subunit OS=Pediococcus pentosaceus (strain ATCC 25745 / CCUG 21536 / LMG 10740 / 183-1w) OX=278197 GN=glyS PE=3 SV=1	SYGB_PEDPA	glyS	Uniprot_Pediococcus_pentosaceus_strain_ATCC.fasta	78150	1	10	10	14	0.000304	0.194	LLPNFISVR	K	N	0.993	44	25	44	1058.64	3350	165675	293	301
sample Treatment	2022 5:30:55 PM;File Size: 1000722054 [Byte] (F057606)	Glycine--tRNA ligase beta subunit OS=Pediococcus pentosaceus (strain ATCC 25745 / CCUG 21536 / LMG 10740 / 183-1w) OX=278197 GN=glyS PE=3 SV=1	SYGB_PEDPA	glyS	Uniprot_Pediococcus_pentosaceus_strain_ATCC.fasta	78150	1	10	10	14	0.000304	0.194	LTYDSIDHFSTPR	R	R	0.997	63.2	25	63.2	1551.74	2720.5	224698	39	51
sample Treatment	2022 5:30:55 PM;File Size: 1000722054 [Byte] (F057606)	Glycine--tRNA ligase beta subunit OS=Pediococcus pentosaceus (strain ATCC 25745 / CCUG 21536 / LMG 10740 / 183-1w) OX=278197 GN=glyS PE=3 SV=1	SYGB_PEDPA	glyS	Uniprot_Pediococcus_pentosaceus_strain_ATCC.fasta	78150	1	10	10	14	0.000304	0.194	NGNEEFIENVVR	R	G	0.995	47.4	25	47.4	1419.69	2988	41254.8	302	313
sample Treatment	2022 5:30:55 PM;File Size: 1000722054 [Byte] (F057606)	Glycine--tRNA ligase beta subunit OS=Pediococcus pentosaceus (strain ATCC 25745 / CCUG 21536 / LMG 10740 / 183-1w) OX=278197 GN=glyS PE=3 SV=1	SYGB_PEDPA	glyS	Uniprot_Pediococcus_pentosaceus_strain_ATCC.fasta	78150	1	10	10	14	0.000304	0.194	VIGNTLNLNQTELDDIDR	K	A	0.997	125	25	125	2043.04	3249.5	56957	370	387
sample Treatment	2022 5:30:55 PM;File Size: 1000722054 [Byte] (F057606)	Small ribosomal subunit biogenesis GTPase RsgA OS=Pediococcus pentosaceus (strain ATCC 25745 / CCUG 21536 / LMG 10740 / 183-1w) OX=278197 GN=rsgA PE=3 SV=1	RSGA_PEDPA	rsgA	Uniprot_Pediococcus_pentosaceus_strain_ATCC.fasta	35065.4	0.998	2	2	4	8.7e-05	0.068	EYFIDFK	K	K	0.9	32.2	25	32.2	961.467	3183	51368.8	237	243
sample Treatment	2022 5:30:55 PM;File Size: 1000722054 [Byte] (F057606)	Small ribosomal subunit biogenesis GTPase RsgA OS=Pediococcus pentosaceus (strain ATCC 25745 / CCUG 21536 / LMG 10740 / 183-1w) OX=278197 GN=rsgA PE=3 SV=1	RSGA_PEDPA	rsgA	Uniprot_Pediococcus_pentosaceus_strain_ATCC.fasta	35065.4	0.998	2	2	4	8.7e-05	0.068	LNIATGEVSQALNR	K	G	0.993	44.5	25	44.5	1485.8	2915.5	123934	185	198
sample Treatment	2022 5:30:55 PM;File Size: 1000722054 [Byte] (F057606)	50S ribosomal subunit assembly factor BipA OS=Pediococcus pentosaceus (strain ATCC 25745 / CCUG 21536 / LMG 10740 / 183-1w) OX=278197 GN=bipA PE=3 SV=1	Q03F12_PEDPA	bipA	Uniprot_Pediococcus_pentosaceus_strain_ATCC.fasta	68783.5	1	23	27	51	0.00111	0.427	AAGSEDIAK	R	V	0.989	40.4	25	40.4	861.431	1194	20237.3	552	560
sample Treatment	2022 5:30:55 PM;File Size: 1000722054 [Byte] (F057606)	50S ribosomal subunit assembly factor BipA OS=Pediococcus pentosaceus (strain ATCC 25745 / CCUG 21536 / LMG 10740 / 183-1w) OX=278197 GN=bipA PE=3 SV=1	Q03F12_PEDPA	bipA	Uniprot_Pediococcus_pentosaceus_strain_ATCC.fasta	68783.5	1	23	27	51	0.00111	0.427	ALDSNAIER	R	E	0.997	69.3	25	68.9	988.506	1886	803727	44	52
sample Treatment	2022 5:30:55 PM;File Size: 1000722054 [Byte] (F057606)	50S ribosomal subunit assembly factor BipA OS=Pediococcus pentosaceus (strain ATCC 25745 / CCUG 21536 / LMG 10740 / 183-1w) OX=278197 GN=bipA PE=3 SV=1	Q03F12_PEDPA	bipA	Uniprot_Pediococcus_pentosaceus_strain_ATCC.fasta	68783.5	1	23	27	51	0.00111	0.427	ALEQHLTPIVVVNK	K	I	0.996	50.9	25	50.9	1560.91	2776.5	786848	118	131
sample Treatment	2022 5:30:55 PM;File Size: 1000722054 [Byte] (F057606)	50S ribosomal subunit assembly factor BipA OS=Pediococcus pentosaceus (strain ATCC 25745 / CCUG 21536 / LMG 10740 / 183-1w) OX=278197 GN=bipA PE=3 SV=1	Q03F12_PEDPA	bipA	Uniprot_Pediococcus_pentosaceus_strain_ATCC.fasta	68783.5	1	23	27	51	0.00111	0.427	EGYELQASRPEVIIK	R	E	0.997	55.8	25	55.8	1731.93	2734	701252	380	394
sample Treatment	2022 5:30:55 PM;File Size: 1000722054 [Byte] (F057606)	50S ribosomal subunit assembly factor BipA OS=Pediococcus pentosaceus (strain ATCC 25745 / CCUG 21536 / LMG 10740 / 183-1w) OX=278197 GN=bipA PE=3 SV=1	Q03F12_PEDPA	bipA	Uniprot_Pediococcus_pentosaceus_strain_ATCC.fasta	68783.5	1	23	27	51	0.00111	0.427	ENDISVNITR	R	G	0.996	49.4	25	49.4	1160.59	2347.5	325906	534	543
sample Treatment	2022 5:30:55 PM;File Size: 1000722054 [Byte] (F057606)	50S ribosomal subunit assembly factor BipA OS=Pediococcus pentosaceus (strain ATCC 25745 / CCUG 21536 / LMG 10740 / 183-1w) OX=278197 GN=bipA PE=3 SV=1	Q03F12_PEDPA	bipA	Uniprot_Pediococcus_pentosaceus_strain_ATCC.fasta	68783.5	1	23	27	51	0.00111	0.427	GLIGYSTEFLSMTR	R	G	0.997	57.7	25	57.7	1574.79	3820	57736.9	451	464
sample Treatment	2022 5:30:55 PM;File Size: 1000722054 [Byte] (F057606)	50S ribosomal subunit assembly factor BipA OS=Pediococcus pentosaceus (strain ATCC 25745 / CCUG 21536 / LMG 10740 / 183-1w) OX=278197 GN=bipA PE=3 SV=1	Q03F12_PEDPA	bipA	Uniprot_Pediococcus_pentosaceus_strain_ATCC.fasta	68783.5	1	23	27	51	0.00111	0.427	IDEPTLQMTFR	R	T	0.997	62.1	25	62.1	1350.67	3150.5	296525	306	316
sample Treatment	2022 5:30:55 PM;File Size: 1000722054 [Byte] (F057606)	50S ribosomal subunit assembly factor BipA OS=Pediococcus pentosaceus (strain ATCC 25745 / CCUG 21536 / LMG 10740 / 183-1w) OX=278197 GN=bipA PE=3 SV=1	Q03F12_PEDPA	bipA	Uniprot_Pediococcus_pentosaceus_strain_ATCC.fasta	68783.5	1	23	27	51	0.00111	0.427	KALEQHLTPIVVVNK	K	I	0.962	33	25	33	1689.01	2538	93874.5	117	131
sample Treatment	2022 5:30:55 PM;File Size: 1000722054 [Byte] (F057606)	50S ribosomal subunit assembly factor BipA OS=Pediococcus pentosaceus (strain ATCC 25745 / CCUG 21536 / LMG 10740 / 183-1w) OX=278197 GN=bipA PE=3 SV=1	Q03F12_PEDPA	bipA	Uniprot_Pediococcus_pentosaceus_strain_ATCC.fasta	68783.5	1	23	27	51	0.00111	0.427	LCEPYEMVQIDTPDEYTGSVIDSLSQR	K	K	0.963	33.1	25	33.1	3161.43	3761	19053.4	400	426
sample Treatment	2022 5:30:55 PM;File Size: 1000722054 [Byte] (F057606)	50S ribosomal subunit assembly factor BipA OS=Pediococcus pentosaceus (strain ATCC 25745 / CCUG 21536 / LMG 10740 / 183-1w) OX=278197 GN=bipA PE=3 SV=1	Q03F12_PEDPA	bipA	Uniprot_Pediococcus_pentosaceus_strain_ATCC.fasta	68783.5	1	23	27	51	0.00111	0.427	LFGYFGLK	K	R	0.958	32.3	25	32.3	944.524	3520	212635	258	265
sample Treatment	2022 5:30:55 PM;File Size: 1000722054 [Byte] (F057606)	50S ribosomal subunit assembly factor BipA OS=Pediococcus pentosaceus (strain ATCC 25745 / CCUG 21536 / LMG 10740 / 183-1w) OX=278197 GN=bipA PE=3 SV=1	Q03F12_PEDPA	bipA	Uniprot_Pediococcus_pentosaceus_strain_ATCC.fasta	68783.5	1	23	27	51	0.00111	0.427	LTFLAPSR	R	G	0.985	38.2	25	38.2	904.525	2707	969688	443	450
sample Treatment	2022 5:30:55 PM;File Size: 1000722054 [Byte] (F057606)	50S ribosomal subunit assembly factor BipA OS=Pediococcus pentosaceus (strain ATCC 25745 / CCUG 21536 / LMG 10740 / 183-1w) OX=278197 GN=bipA PE=3 SV=1	Q03F12_PEDPA	bipA	Uniprot_Pediococcus_pentosaceus_strain_ATCC.fasta	68783.5	1	23	27	51	0.00111	0.427	NGTLVSINSGK	R	V	0.986	38.9	25	38.9	1089.59	2142	81177.3	489	499
sample Treatment	2022 5:30:55 PM;File Size: 1000722054 [Byte] (F057606)	50S ribosomal subunit assembly factor BipA OS=Pediococcus pentosaceus (strain ATCC 25745 / CCUG 21536 / LMG 10740 / 183-1w) OX=278197 GN=bipA PE=3 SV=1	Q03F12_PEDPA	bipA	Uniprot_Pediococcus_pentosaceus_strain_ATCC.fasta	68783.5	1	23	27	51	0.00111	0.427	NIAIIAHVDHGK	R	T	0.997	59.3	25	59.3	1287.72	2233	1347340	9	20
sample Treatment	2022 5:30:55 PM;File Size: 1000722054 [Byte] (F057606)	50S ribosomal subunit assembly factor BipA OS=Pediococcus pentosaceus (strain ATCC 25745 / CCUG 21536 / LMG 10740 / 183-1w) OX=278197 GN=bipA PE=3 SV=1	Q03F12_PEDPA	bipA	Uniprot_Pediococcus_pentosaceus_strain_ATCC.fasta	68783.5	1	23	27	51	0.00111	0.427	QILNTNER	K	E	0.99	45.6	25	45.6	987.522	1794.5	238557	594	601
sample Treatment	2022 5:30:55 PM;File Size: 1000722054 [Byte] (F057606)	50S ribosomal subunit assembly factor BipA OS=Pediococcus pentosaceus (strain ATCC 25745 / CCUG 21536 / LMG 10740 / 183-1w) OX=278197 GN=bipA PE=3 SV=1	Q03F12_PEDPA	bipA	Uniprot_Pediococcus_pentosaceus_strain_ATCC.fasta	68783.5	1	23	27	51	0.00111	0.427	QINILDTPGHADFGGEVER	K	I	0.981	37	25	37	2068.01	3047	541557	71	89
sample Treatment	2022 5:30:55 PM;File Size: 1000722054 [Byte] (F057606)	50S ribosomal subunit assembly factor BipA OS=Pediococcus pentosaceus (strain ATCC 25745 / CCUG 21536 / LMG 10740 / 183-1w) OX=278197 GN=bipA PE=3 SV=1	Q03F12_PEDPA	bipA	Uniprot_Pediococcus_pentosaceus_strain_ATCC.fasta	68783.5	1	23	27	51	0.00111	0.427	QSDTLDEHVQIEDR	K	A	0.997	54.5	25	54.5	1684.78	2247.5	419202	30	43
sample Treatment	2022 5:30:55 PM;File Size: 1000722054 [Byte] (F057606)	50S ribosomal subunit assembly factor BipA OS=Pediococcus pentosaceus (strain ATCC 25745 / CCUG 21536 / LMG 10740 / 183-1w) OX=278197 GN=bipA PE=3 SV=1	Q03F12_PEDPA	bipA	Uniprot_Pediococcus_pentosaceus_strain_ATCC.fasta	68783.5	1	23	27	51	0.00111	0.427	RLEINEAK	K	A	0.99	46	25	42.8	972.547	1677.5	439422	266	273
sample Treatment	2022 5:30:55 PM;File Size: 1000722054 [Byte] (F057606)	50S ribosomal subunit assembly factor BipA OS=Pediococcus pentosaceus (strain ATCC 25745 / CCUG 21536 / LMG 10740 / 183-1w) OX=278197 GN=bipA PE=3 SV=1	Q03F12_PEDPA	bipA	Uniprot_Pediococcus_pentosaceus_strain_ATCC.fasta	68783.5	1	23	27	51	0.00111	0.427	TELHTDVSLR	K	V	0.982	37.3	25	37.3	1170.61	2165	201575	341	350
sample Treatment	2022 5:30:55 PM;File Size: 1000722054 [Byte] (F057606)	50S ribosomal subunit assembly factor BipA OS=Pediococcus pentosaceus (strain ATCC 25745 / CCUG 21536 / LMG 10740 / 183-1w) OX=278197 GN=bipA PE=3 SV=1	Q03F12_PEDPA	bipA	Uniprot_Pediococcus_pentosaceus_strain_ATCC.fasta	68783.5	1	23	27	51	0.00111	0.427	TNDSPFAGR	R	E	0.997	58.8	25	53.8	964.448	1882.5	471617	317	325
sample Treatment	2022 5:30:55 PM;File Size: 1000722054 [Byte] (F057606)	50S ribosomal subunit assembly factor BipA OS=Pediococcus pentosaceus (strain ATCC 25745 / CCUG 21536 / LMG 10740 / 183-1w) OX=278197 GN=bipA PE=3 SV=1	Q03F12_PEDPA	bipA	Uniprot_Pediococcus_pentosaceus_strain_ATCC.fasta	68783.5	1	23	27	51	0.00111	0.427	TTLVNELLK	K	Q	0.986	39	25	38.3	1030.61	3307	88608.9	21	29
sample Treatment	2022 5:30:55 PM;File Size: 1000722054 [Byte] (F057606)	50S ribosomal subunit assembly factor BipA OS=Pediococcus pentosaceus (strain ATCC 25745 / CCUG 21536 / LMG 10740 / 183-1w) OX=278197 GN=bipA PE=3 SV=1	Q03F12_PEDPA	bipA	Uniprot_Pediococcus_pentosaceus_strain_ATCC.fasta	68783.5	1	23	27	51	0.00111	0.427	VDDTDDPGAWIVSGR	R	G	0.997	111	25	111	1602.74	3074.5	178549	351	365
sample Treatment	2022 5:30:55 PM;File Size: 1000722054 [Byte] (F057606)	50S ribosomal subunit assembly factor BipA OS=Pediococcus pentosaceus (strain ATCC 25745 / CCUG 21536 / LMG 10740 / 183-1w) OX=278197 GN=bipA PE=3 SV=1	Q03F12_PEDPA	bipA	Uniprot_Pediococcus_pentosaceus_strain_ATCC.fasta	68783.5	1	23	27	51	0.00111	0.427	VGDNVSVLK	K	L	0.997	61.5	25	56.7	930.525	2103	530629	237	245
sample Treatment	2022 5:30:55 PM;File Size: 1000722054 [Byte] (F057606)	50S ribosomal subunit assembly factor BipA OS=Pediococcus pentosaceus (strain ATCC 25745 / CCUG 21536 / LMG 10740 / 183-1w) OX=278197 GN=bipA PE=3 SV=1	Q03F12_PEDPA	bipA	Uniprot_Pediococcus_pentosaceus_strain_ATCC.fasta	68783.5	1	23	27	51	0.00111	0.427	VTTYAIMAVQDR	K	G	0.997	50.3	25	50.3	1383.69	2445	55466.8	500	511
sample Treatment	2022 5:30:55 PM;File Size: 1000722054 [Byte] (F057606)	Periplasmic protease OS=Pediococcus pentosaceus (strain ATCC 25745 / CCUG 21536 / LMG 10740 / 183-1w) OX=278197 GN=PEPE_1062 PE=3 SV=1	Q03FA4_PEDPA	PEPE_1062	Uniprot_Pediococcus_pentosaceus_strain_ATCC.fasta	51653.1	1	3	3	5	0.000109	0.0784	GTVQNITQYTDSDELK	K	L	0.979	36.2	25	36.2	1811.87	2763	35687.5	328	343
sample Treatment	2022 5:30:55 PM;File Size: 1000722054 [Byte] (F057606)	Periplasmic protease OS=Pediococcus pentosaceus (strain ATCC 25745 / CCUG 21536 / LMG 10740 / 183-1w) OX=278197 GN=PEPE_1062 PE=3 SV=1	Q03FA4_PEDPA	PEPE_1062	Uniprot_Pediococcus_pentosaceus_strain_ATCC.fasta	51653.1	1	3	3	5	0.000109	0.0784	NIQIALK	K	G	0.9	41.4	25	35.4	799.504	2532.5	107734	396	402
sample Treatment	2022 5:30:55 PM;File Size: 1000722054 [Byte] (F057606)	Periplasmic protease OS=Pediococcus pentosaceus (strain ATCC 25745 / CCUG 21536 / LMG 10740 / 183-1w) OX=278197 GN=PEPE_1062 PE=3 SV=1	Q03FA4_PEDPA	PEPE_1062	Uniprot_Pediococcus_pentosaceus_strain_ATCC.fasta	51653.1	1	3	3	5	0.000109	0.0784	VASVYNQINSDYYK	R	K	0.997	61.5	25	49.9	1663.8	2689	68235.6	49	62
sample Treatment	2022 5:30:55 PM;File Size: 1000722054 [Byte] (F057606)	16S rRNA (cytosine(967)-C(5))-methyltransferase OS=Pediococcus pentosaceus (strain ATCC 25745 / CCUG 21536 / LMG 10740 / 183-1w) OX=278197 GN=PEPE_0830 PE=3 SV=1	Q03FY2_PEDPA	PEPE_0830	Uniprot_Pediococcus_pentosaceus_strain_ATCC.fasta	50495.2	0.519	1	1	1	2.17e-05	0.0203	NLAVDILEK	R	I	0.954	31.7	25	31.7	1014.58	3124	42023.7	10	18
sample Treatment	2022 5:30:55 PM;File Size: 1000722054 [Byte] (F057606)	Amino acid ABC transporter substrate-binding protein, PAAT family / amino acid ABC transporter membrane protein, PAAT family OS=Pediococcus pentosaceus (strain ATCC 25745 / CCUG 21536 / LMG 10740 / 183-1w) OX=278197 GN=PEPE_1068 PE=3 SV=1	Q03F98_PEDPA	PEPE_1068	Uniprot_Pediococcus_pentosaceus_strain_ATCC.fasta	52708.1	0.994	1	1	1	2.17e-05	0.0228	YLGASAVASQK	K	A	0.981	37	25	37	1094.58	1958	55261.8	252	262
sample Treatment	2022 5:30:55 PM;File Size: 1000722054 [Byte] (F057606)	Superfamily II DNA and RNA helicase OS=Pediococcus pentosaceus (strain ATCC 25745 / CCUG 21536 / LMG 10740 / 183-1w) OX=278197 GN=PEPE_0590 PE=3 SV=1	Q03GJ4_PEDPA	PEPE_0590	Uniprot_Pediococcus_pentosaceus_strain_ATCC.fasta	48760.7	1	7	7	11	0.000239	0.189	EWAALIGLR	R	V	0.997	65.9	25	61.2	1028.59	3575.5	109042	83	91
sample Treatment	2022 5:30:55 PM;File Size: 1000722054 [Byte] (F057606)	Superfamily II DNA and RNA helicase OS=Pediococcus pentosaceus (strain ATCC 25745 / CCUG 21536 / LMG 10740 / 183-1w) OX=278197 GN=PEPE_0590 PE=3 SV=1	Q03GJ4_PEDPA	PEPE_0590	Uniprot_Pediococcus_pentosaceus_strain_ATCC.fasta	48760.7	1	7	7	11	0.000239	0.189	IAGHQVQIDR	K	A	0.975	35.2	25	35.2	1136.62	1729	56551.2	260	269
sample Treatment	2022 5:30:55 PM;File Size: 1000722054 [Byte] (F057606)	Superfamily II DNA and RNA helicase OS=Pediococcus pentosaceus (strain ATCC 25745 / CCUG 21536 / LMG 10740 / 183-1w) OX=278197 GN=PEPE_0590 PE=3 SV=1	Q03GJ4_PEDPA	PEPE_0590	Uniprot_Pediococcus_pentosaceus_strain_ATCC.fasta	48760.7	1	7	7	11	0.000239	0.189	IILASEYVEAPK	K	A	0.997	58.7	25	58.7	1332.74	2898.5	207211	363	374
sample Treatment	2022 5:30:55 PM;File Size: 1000722054 [Byte] (F057606)	Superfamily II DNA and RNA helicase OS=Pediococcus pentosaceus (strain ATCC 25745 / CCUG 21536 / LMG 10740 / 183-1w) OX=278197 GN=PEPE_0590 PE=3 SV=1	Q03GJ4_PEDPA	PEPE_0590	Uniprot_Pediococcus_pentosaceus_strain_ATCC.fasta	48760.7	1	7	7	11	0.000239	0.189	MGQDGYVISLGNDHDIR	R	D	0.997	53.3	25	53.3	1889.88	2898	164947	324	340
sample Treatment	2022 5:30:55 PM;File Size: 1000722054 [Byte] (F057606)	Superfamily II DNA and RNA helicase OS=Pediococcus pentosaceus (strain ATCC 25745 / CCUG 21536 / LMG 10740 / 183-1w) OX=278197 GN=PEPE_0590 PE=3 SV=1	Q03GJ4_PEDPA	PEPE_0590	Uniprot_Pediococcus_pentosaceus_strain_ATCC.fasta	48760.7	1	7	7	11	0.000239	0.189	NGESVLGLSPTGSGK	R	T	0.99	41.4	25	41.4	1402.72	2625	36522.4	30	44
sample Treatment	2022 5:30:55 PM;File Size: 1000722054 [Byte] (F057606)	Superfamily II DNA and RNA helicase OS=Pediococcus pentosaceus (strain ATCC 25745 / CCUG 21536 / LMG 10740 / 183-1w) OX=278197 GN=PEPE_0590 PE=3 SV=1	Q03GJ4_PEDPA	PEPE_0590	Uniprot_Pediococcus_pentosaceus_strain_ATCC.fasta	48760.7	1	7	7	11	0.000239	0.189	VLTLINER	R	R	0.99	41.7	25	41.1	957.573	2635	112995	122	129
sample Treatment	2022 5:30:55 PM;File Size: 1000722054 [Byte] (F057606)	Superfamily II DNA and RNA helicase OS=Pediococcus pentosaceus (strain ATCC 25745 / CCUG 21536 / LMG 10740 / 183-1w) OX=278197 GN=PEPE_0590 PE=3 SV=1	Q03GJ4_PEDPA	PEPE_0590	Uniprot_Pediococcus_pentosaceus_strain_ATCC.fasta	48760.7	1	7	7	11	0.000239	0.189	VTSITGGANVQR	R	Q	0.997	71	25	71	1202.65	1845.5	121810	92	103
sample Treatment	2022 5:30:55 PM;File Size: 1000722054 [Byte] (F057606)	Replicative DNA helicase loader DnaI OS=Pediococcus pentosaceus (strain ATCC 25745 / CCUG 21536 / LMG 10740 / 183-1w) OX=278197 GN=PEPE_0693 PE=4 SV=1	Q03GB8_PEDPA	PEPE_0693	Uniprot_Pediococcus_pentosaceus_strain_ATCC.fasta	35455.5	0.999	2	2	4	8.7e-05	0.0809	HASLEGYYQEPER	R	T	0.973	34.9	25	34.9	1578.72	2192	156032	123	135
sample Treatment	2022 5:30:55 PM;File Size: 1000722054 [Byte] (F057606)	Replicative DNA helicase loader DnaI OS=Pediococcus pentosaceus (strain ATCC 25745 / CCUG 21536 / LMG 10740 / 183-1w) OX=278197 GN=PEPE_0693 PE=4 SV=1	Q03GB8_PEDPA	PEPE_0693	Uniprot_Pediococcus_pentosaceus_strain_ATCC.fasta	35455.5	0.999	2	2	4	8.7e-05	0.0809	NAIGSSNTIQTK	K	I	0.993	44.5	25	44.5	1233.64	1725.5	57051.8	202	213
sample Treatment	2022 5:30:55 PM;File Size: 1000722054 [Byte] (F057606)	Thiol-disulfide isomerase and thioredoxin OS=Pediococcus pentosaceus (strain ATCC 25745 / CCUG 21536 / LMG 10740 / 183-1w) OX=278197 GN=PEPE_0102 PE=4 SV=1	Q03HW0_PEDPA	PEPE_0102	Uniprot_Pediococcus_pentosaceus_strain_ATCC.fasta	12058.1	1	2	2	6	0.00013	0.311	RTPQEVEEFIQGIA	R	-	0.997	51.4	25	51.4	1616.83	3639	602228	93	106
sample Treatment	2022 5:30:55 PM;File Size: 1000722054 [Byte] (F057606)	Thiol-disulfide isomerase and thioredoxin OS=Pediococcus pentosaceus (strain ATCC 25745 / CCUG 21536 / LMG 10740 / 183-1w) OX=278197 GN=PEPE_0102 PE=4 SV=1	Q03HW0_PEDPA	PEPE_0102	Uniprot_Pediococcus_pentosaceus_strain_ATCC.fasta	12058.1	1	2	2	6	0.00013	0.311	STQANLTNEEIFEAMNSGK	M	K	0.997	84.9	25	84.9	2083.96	3218	44095	2	20
sample Treatment	2022 5:30:55 PM;File Size: 1000722054 [Byte] (F057606)	Inosine-5'-monophosphate dehydrogenase OS=Pediococcus pentosaceus (strain ATCC 25745 / CCUG 21536 / LMG 10740 / 183-1w) OX=278197 GN=PEPE_1719 PE=3 SV=1	Q03DI2_PEDPA	PEPE_1719	Uniprot_Pediococcus_pentosaceus_strain_ATCC.fasta	39655.9	1	3	3	4	8.7e-05	0.111	LVPEGIEAR	K	V	0.984	38	25	38	983.552	2184.5	130134	306	314
sample Treatment	2022 5:30:55 PM;File Size: 1000722054 [Byte] (F057606)	Inosine-5'-monophosphate dehydrogenase OS=Pediococcus pentosaceus (strain ATCC 25745 / CCUG 21536 / LMG 10740 / 183-1w) OX=278197 GN=PEPE_1719 PE=3 SV=1	Q03DI2_PEDPA	PEPE_1719	Uniprot_Pediococcus_pentosaceus_strain_ATCC.fasta	39655.9	1	3	3	4	8.7e-05	0.111	VGIGPGSICTTR	K	V	0.986	38.7	25	38.7	1217.63	2401	60775.6	190	201
sample Treatment	2022 5:30:55 PM;File Size: 1000722054 [Byte] (F057606)	Inosine-5'-monophosphate dehydrogenase OS=Pediococcus pentosaceus (strain ATCC 25745 / CCUG 21536 / LMG 10740 / 183-1w) OX=278197 GN=PEPE_1719 PE=3 SV=1	Q03DI2_PEDPA	PEPE_1719	Uniprot_Pediococcus_pentosaceus_strain_ATCC.fasta	39655.9	1	3	3	4	8.7e-05	0.111	VVAGVGVPQITAIYDAANVAR	R	E	0.961	32.8	25	32.8	2084.15	3846	38776.2	202	222
sample Treatment	2022 5:30:55 PM;File Size: 1000722054 [Byte] (F057606)	Transcriptional repressor NrdR OS=Pediococcus pentosaceus (strain ATCC 25745 / CCUG 21536 / LMG 10740 / 183-1w) OX=278197 GN=nrdR PE=3 SV=1	NRDR_PEDPA	nrdR	Uniprot_Pediococcus_pentosaceus_strain_ATCC.fasta	18440.4	0.975	1	1	2	4.35e-05	0.0637	VEATPLLVIK	R	K	0.973	34.6	25	34.6	1082.68	3162	152607	44	53
sample Treatment	2022 5:30:55 PM;File Size: 1000722054 [Byte] (F057606)	YycH domain-containing protein OS=Pediococcus pentosaceus (strain ATCC 25745 / CCUG 21536 / LMG 10740 / 183-1w) OX=278197 GN=PEPE_1795 PE=4 SV=1	Q03DA6_PEDPA	PEPE_1795	Uniprot_Pediococcus_pentosaceus_strain_ATCC.fasta	49457.5	1	2	2	3	6.52e-05	0.0882	DKGDVILPTQVIYTK	R	G	0.95	31.5	25	31.5	1689.94	3067	77949.6	55	69
sample Treatment	2022 5:30:55 PM;File Size: 1000722054 [Byte] (F057606)	YycH domain-containing protein OS=Pediococcus pentosaceus (strain ATCC 25745 / CCUG 21536 / LMG 10740 / 183-1w) OX=278197 GN=PEPE_1795 PE=4 SV=1	Q03DA6_PEDPA	PEPE_1795	Uniprot_Pediococcus_pentosaceus_strain_ATCC.fasta	49457.5	1	2	2	3	6.52e-05	0.0882	YSGINTDKIEDIDIGYERPSTTK	K	A	0.997	53.6	25	53.6	2615.28	2946.5	213619	382	404
sample Treatment	2022 5:30:55 PM;File Size: 1000722054 [Byte] (F057606)	30S ribosomal protein S9 OS=Pediococcus pentosaceus (strain ATCC 25745 / CCUG 21536 / LMG 10740 / 183-1w) OX=278197 GN=rpsI PE=3 SV=1	RS9_PEDPA	rpsI	Uniprot_Pediococcus_pentosaceus_strain_ATCC.fasta	14366.9	1	2	2	7	0.000152	0.215	ALLDVDPDFR	R	A	0.997	61	25	60.8	1160.59	3217.5	3153800	86	95
sample Treatment	2022 5:30:55 PM;File Size: 1000722054 [Byte] (F057606)	30S ribosomal protein S9 OS=Pediococcus pentosaceus (strain ATCC 25745 / CCUG 21536 / LMG 10740 / 183-1w) OX=278197 GN=rpsI PE=3 SV=1	RS9_PEDPA	rpsI	Uniprot_Pediococcus_pentosaceus_strain_ATCC.fasta	14366.9	1	2	2	7	0.000152	0.215	ITVNDRPIEEYIPFANLR	K	Q	0.984	38.4	25	38.4	2160.14	3793	2344820	28	45
sample Treatment	2022 5:30:55 PM;File Size: 1000722054 [Byte] (F057606)	Adenylosuccinate synthetase OS=Pediococcus pentosaceus (strain ATCC 25745 / CCUG 21536 / LMG 10740 / 183-1w) OX=278197 GN=purA PE=3 SV=1	PURA_PEDPA	purA	Uniprot_Pediococcus_pentosaceus_strain_ATCC.fasta	47724.5	1	7	7	12	0.000261	0.227	AIDLLDNETLEEK	R	I	0.967	33.6	25	33.6	1502.76	3127	121669	149	161
sample Treatment	2022 5:30:55 PM;File Size: 1000722054 [Byte] (F057606)	Adenylosuccinate synthetase OS=Pediococcus pentosaceus (strain ATCC 25745 / CCUG 21536 / LMG 10740 / 183-1w) OX=278197 GN=purA PE=3 SV=1	PURA_PEDPA	purA	Uniprot_Pediococcus_pentosaceus_strain_ATCC.fasta	47724.5	1	7	7	12	0.000261	0.227	EIAHEYGTVTK	R	R	0.904	28.5	25	28.5	1247.63	1706	96762.8	293	303
sample Treatment	2022 5:30:55 PM;File Size: 1000722054 [Byte] (F057606)	Adenylosuccinate synthetase OS=Pediococcus pentosaceus (strain ATCC 25745 / CCUG 21536 / LMG 10740 / 183-1w) OX=278197 GN=purA PE=3 SV=1	PURA_PEDPA	purA	Uniprot_Pediococcus_pentosaceus_strain_ATCC.fasta	47724.5	1	7	7	12	0.000261	0.227	IAFNLEQK	K	K	0.963	32.9	25	32.9	962.531	2654	160850	162	169
sample Treatment	2022 5:30:55 PM;File Size: 1000722054 [Byte] (F057606)	Adenylosuccinate synthetase OS=Pediococcus pentosaceus (strain ATCC 25745 / CCUG 21536 / LMG 10740 / 183-1w) OX=278197 GN=purA PE=3 SV=1	PURA_PEDPA	purA	Uniprot_Pediococcus_pentosaceus_strain_ATCC.fasta	47724.5	1	7	7	12	0.000261	0.227	ICTGYQTDHGVIK	K	Y	0.997	60.7	25	60.7	1491.73	2018.5	164950	344	356
sample Treatment	2022 5:30:55 PM;File Size: 1000722054 [Byte] (F057606)	Adenylosuccinate synthetase OS=Pediococcus pentosaceus (strain ATCC 25745 / CCUG 21536 / LMG 10740 / 183-1w) OX=278197 GN=purA PE=3 SV=1	PURA_PEDPA	purA	Uniprot_Pediococcus_pentosaceus_strain_ATCC.fasta	47724.5	1	7	7	12	0.000261	0.227	KIEEITGVPVSAFSIGPDR	K	E	0.978	36.2	25	36.2	2015.08	3389	78332.6	401	419
sample Treatment	2022 5:30:55 PM;File Size: 1000722054 [Byte] (F057606)	Adenylosuccinate synthetase OS=Pediococcus pentosaceus (strain ATCC 25745 / CCUG 21536 / LMG 10740 / 183-1w) OX=278197 GN=purA PE=3 SV=1	PURA_PEDPA	purA	Uniprot_Pediococcus_pentosaceus_strain_ATCC.fasta	47724.5	1	7	7	12	0.000261	0.227	VGEGPFPTEQINEVGDR	R	I	0.997	67.8	25	67.8	1843.88	2859	89619.6	274	290
sample Treatment	2022 5:30:55 PM;File Size: 1000722054 [Byte] (F057606)	Adenylosuccinate synthetase OS=Pediococcus pentosaceus (strain ATCC 25745 / CCUG 21536 / LMG 10740 / 183-1w) OX=278197 GN=purA PE=3 SV=1	PURA_PEDPA	purA	Uniprot_Pediococcus_pentosaceus_strain_ATCC.fasta	47724.5	1	7	7	12	0.000261	0.227	YSGGDNAGHSLVVNDQK	R	L	0.997	57	25	57	1760.82	1865.5	160541	33	49
sample Treatment	2022 5:30:55 PM;File Size: 1000722054 [Byte] (F057606)	Tryptophan--tRNA ligase OS=Pediococcus pentosaceus (strain ATCC 25745 / CCUG 21536 / LMG 10740 / 183-1w) OX=278197 GN=trpS PE=3 SV=1	Q03HG9_PEDPA	trpS	Uniprot_Pediococcus_pentosaceus_strain_ATCC.fasta	38614	1	2	2	3	6.52e-05	0.0643	IILTGDRPTGK	K	L	0.976	35.5	25	35.5	1170.68	1930	69875	6	16
sample Treatment	2022 5:30:55 PM;File Size: 1000722054 [Byte] (F057606)	Tryptophan--tRNA ligase OS=Pediococcus pentosaceus (strain ATCC 25745 / CCUG 21536 / LMG 10740 / 183-1w) OX=278197 GN=trpS PE=3 SV=1	Q03HG9_PEDPA	trpS	Uniprot_Pediococcus_pentosaceus_strain_ATCC.fasta	38614	1	2	2	3	6.52e-05	0.0643	LHIGHYVGSLK	K	N	0.989	41.2	25	41.2	1223.69	2364.5	126220	17	27
sample Treatment	2022 5:30:55 PM;File Size: 1000722054 [Byte] (F057606)	EMAP domain OS=Pediococcus pentosaceus (strain ATCC 25745 / CCUG 21536 / LMG 10740 / 183-1w) OX=278197 GN=PEPE_0684 PE=4 SV=1	Q03GC7_PEDPA	PEPE_0684	Uniprot_Pediococcus_pentosaceus_strain_ATCC.fasta	22898.4	0.996	2	2	4	8.7e-05	0.0857	FVVGYVK	K	S	0.9	32.5	25	32.5	811.471	2482	102263	96	102
sample Treatment	2022 5:30:55 PM;File Size: 1000722054 [Byte] (F057606)	EMAP domain OS=Pediococcus pentosaceus (strain ATCC 25745 / CCUG 21536 / LMG 10740 / 183-1w) OX=278197 GN=PEPE_0684 PE=4 SV=1	Q03GC7_PEDPA	PEPE_0684	Uniprot_Pediococcus_pentosaceus_strain_ATCC.fasta	22898.4	0.996	2	2	4	8.7e-05	0.0857	GPITLTQEQVK	K	Q	0.986	39	25	39	1213.68	2385	366645	63	73
sample Treatment	2022 5:30:55 PM;File Size: 1000722054 [Byte] (F057606)	Recombination protein MgsA OS=Pediococcus pentosaceus (strain ATCC 25745 / CCUG 21536 / LMG 10740 / 183-1w) OX=278197 GN=PEPE_1298 PE=3 SV=1	Q03EN3_PEDPA	PEPE_1298	Uniprot_Pediococcus_pentosaceus_strain_ATCC.fasta	46638.6	0.999	1	1	2	4.35e-05	0.0282	LLESGDLQSVIR	R	R	0.997	50.4	25	50.4	1329.74	3070	107932	265	276
sample Treatment	2022 5:30:55 PM;File Size: 1000722054 [Byte] (F057606)	D-3-phosphoglycerate dehydrogenase OS=Pediococcus pentosaceus (strain ATCC 25745 / CCUG 21536 / LMG 10740 / 183-1w) OX=278197 GN=PEPE_1377 PE=3 SV=1	Q03EF7_PEDPA	PEPE_1377	Uniprot_Pediococcus_pentosaceus_strain_ATCC.fasta	35597.9	1	3	3	5	0.000109	0.127	DNVTYLNSSSITK	K	A	0.988	40	25	40	1441.72	2463.5	91015	20	32
sample Treatment	2022 5:30:55 PM;File Size: 1000722054 [Byte] (F057606)	D-3-phosphoglycerate dehydrogenase OS=Pediococcus pentosaceus (strain ATCC 25745 / CCUG 21536 / LMG 10740 / 183-1w) OX=278197 GN=PEPE_1377 PE=3 SV=1	Q03EF7_PEDPA	PEPE_1377	Uniprot_Pediococcus_pentosaceus_strain_ATCC.fasta	35597.9	1	3	3	5	0.000109	0.127	HYEELTLLSNKK	R	W	0.898	28.2	25	28.2	1474.79	2503	45375.4	127	138
sample Treatment	2022 5:30:55 PM;File Size: 1000722054 [Byte] (F057606)	D-3-phosphoglycerate dehydrogenase OS=Pediococcus pentosaceus (strain ATCC 25745 / CCUG 21536 / LMG 10740 / 183-1w) OX=278197 GN=PEPE_1377 PE=3 SV=1	Q03EF7_PEDPA	PEPE_1377	Uniprot_Pediococcus_pentosaceus_strain_ATCC.fasta	35597.9	1	3	3	5	0.000109	0.127	WLIFGTGHIGQEIAR	K	E	0.986	39	25	39	1697.91	3631.5	79695.1	139	153
sample Treatment	2022 5:30:55 PM;File Size: 1000722054 [Byte] (F057606)	ATPase component of ABC transporter with duplicated ATPase domains OS=Pediococcus pentosaceus (strain ATCC 25745 / CCUG 21536 / LMG 10740 / 183-1w) OX=278197 GN=PEPE_0377 PE=4 SV=1	Q03H49_PEDPA	PEPE_0377	Uniprot_Pediococcus_pentosaceus_strain_ATCC.fasta	58456.7	1	3	3	6	0.00013	0.0853	SILGVIPALGGEAHFSPSAK	K	V	0.993	44.6	25	44.6	1951.06	3704.5	166297	366	385
sample Treatment	2022 5:30:55 PM;File Size: 1000722054 [Byte] (F057606)	ATPase component of ABC transporter with duplicated ATPase domains OS=Pediococcus pentosaceus (strain ATCC 25745 / CCUG 21536 / LMG 10740 / 183-1w) OX=278197 GN=PEPE_0377 PE=4 SV=1	Q03H49_PEDPA	PEPE_0377	Uniprot_Pediococcus_pentosaceus_strain_ATCC.fasta	58456.7	1	3	3	6	0.00013	0.0853	VTNCICDVSFNK	K	I	0.996	49.2	25	49.2	1456.66	2551	95514.6	222	233
sample Treatment	2022 5:30:55 PM;File Size: 1000722054 [Byte] (F057606)	ATPase component of ABC transporter with duplicated ATPase domains OS=Pediococcus pentosaceus (strain ATCC 25745 / CCUG 21536 / LMG 10740 / 183-1w) OX=278197 GN=PEPE_0377 PE=4 SV=1	Q03H49_PEDPA	PEPE_0377	Uniprot_Pediococcus_pentosaceus_strain_ATCC.fasta	58456.7	1	3	3	6	0.00013	0.0853	YYADYAENLDDK	K	L	0.997	59.7	25	59.7	1479.63	2465	89568	104	115
sample Treatment	2022 5:30:55 PM;File Size: 1000722054 [Byte] (F057606)	D-alanine--D-alanine ligase OS=Pediococcus pentosaceus (strain ATCC 25745 / CCUG 21536 / LMG 10740 / 183-1w) OX=278197 GN=ddl PE=3 SV=1	DDL_PEDPA	ddl	Uniprot_Pediococcus_pentosaceus_strain_ATCC.fasta	38352.1	1	4	4	6	0.00013	0.151	FVTPPEIEDDVHDEMKR	K	V	0.997	39.4	25	39.4	2056.96	3066	42825.4	261	277
sample Treatment	2022 5:30:55 PM;File Size: 1000722054 [Byte] (F057606)	D-alanine--D-alanine ligase OS=Pediococcus pentosaceus (strain ATCC 25745 / CCUG 21536 / LMG 10740 / 183-1w) OX=278197 GN=ddl PE=3 SV=1	DDL_PEDPA	ddl	Uniprot_Pediococcus_pentosaceus_strain_ATCC.fasta	38352.1	1	4	4	6	0.00013	0.151	TAQFAVLHAK	K	D	0.954	32	25	32	1085.61	2256.5	178524	156	165
sample Treatment	2022 5:30:55 PM;File Size: 1000722054 [Byte] (F057606)	D-alanine--D-alanine ligase OS=Pediococcus pentosaceus (strain ATCC 25745 / CCUG 21536 / LMG 10740 / 183-1w) OX=278197 GN=ddl PE=3 SV=1	DDL_PEDPA	ddl	Uniprot_Pediococcus_pentosaceus_strain_ATCC.fasta	38352.1	1	4	4	6	0.00013	0.151	TDGTVGLFGK	R	N	0.943	30.7	25	30.7	994.521	2605	43409.9	82	91
sample Treatment	2022 5:30:55 PM;File Size: 1000722054 [Byte] (F057606)	D-alanine--D-alanine ligase OS=Pediococcus pentosaceus (strain ATCC 25745 / CCUG 21536 / LMG 10740 / 183-1w) OX=278197 GN=ddl PE=3 SV=1	DDL_PEDPA	ddl	Uniprot_Pediococcus_pentosaceus_strain_ATCC.fasta	38352.1	1	4	4	6	0.00013	0.151	VAVQTMDALGMTNYGR	R	V	0.984	38	25	38	1726.83	3061	59242.8	278	293
sample Treatment	2022 5:30:55 PM;File Size: 1000722054 [Byte] (F057606)	2,3-bisphosphoglycerate-dependent phosphoglycerate mutase OS=Pediococcus pentosaceus (strain ATCC 25745 / CCUG 21536 / LMG 10740 / 183-1w) OX=278197 GN=gpmA PE=3 SV=1	Q03DJ1_PEDPA	gpmA	Uniprot_Pediococcus_pentosaceus_strain_ATCC.fasta	25898.8	1	11	14	67	0.00146	0.511	EAGIEFDQAYTSVLTR	K	A	0.997	105	25	105	1799.88	3444	1930800	45	60
sample Treatment	2022 5:30:55 PM;File Size: 1000722054 [Byte] (F057606)	2,3-bisphosphoglycerate-dependent phosphoglycerate mutase OS=Pediococcus pentosaceus (strain ATCC 25745 / CCUG 21536 / LMG 10740 / 183-1w) OX=278197 GN=gpmA PE=3 SV=1	Q03DJ1_PEDPA	gpmA	Uniprot_Pediococcus_pentosaceus_strain_ATCC.fasta	25898.8	1	11	14	67	0.00146	0.511	HYGALQGQNK	R	A	0.997	66.3	25	66.3	1115.56	1292.5	764425	89	98
sample Treatment	2022 5:30:55 PM;File Size: 1000722054 [Byte] (F057606)	2,3-bisphosphoglycerate-dependent phosphoglycerate mutase OS=Pediococcus pentosaceus (strain ATCC 25745 / CCUG 21536 / LMG 10740 / 183-1w) OX=278197 GN=gpmA PE=3 SV=1	Q03DJ1_PEDPA	gpmA	Uniprot_Pediococcus_pentosaceus_strain_ATCC.fasta	25898.8	1	11	14	67	0.00146	0.511	IIPGGENLK	R	V	0.994	45	25	24.1	940.546	2087	4149480	145	153
sample Treatment	2022 5:30:55 PM;File Size: 1000722054 [Byte] (F057606)	2,3-bisphosphoglycerate-dependent phosphoglycerate mutase OS=Pediococcus pentosaceus (strain ATCC 25745 / CCUG 21536 / LMG 10740 / 183-1w) OX=278197 GN=gpmA PE=3 SV=1	Q03DJ1_PEDPA	gpmA	Uniprot_Pediococcus_pentosaceus_strain_ATCC.fasta	25898.8	1	11	14	67	0.00146	0.511	NVIIAAHGNSLR	K	A	0.997	66.2	25	66.2	1264.71	2139	2715260	176	187
sample Treatment	2022 5:30:55 PM;File Size: 1000722054 [Byte] (F057606)	2,3-bisphosphoglycerate-dependent phosphoglycerate mutase OS=Pediococcus pentosaceus (strain ATCC 25745 / CCUG 21536 / LMG 10740 / 183-1w) OX=278197 GN=gpmA PE=3 SV=1	Q03DJ1_PEDPA	gpmA	Uniprot_Pediococcus_pentosaceus_strain_ATCC.fasta	25898.8	1	11	14	67	0.00146	0.511	RSYDVLPPLLDADDEGSAANDR	R	R	0.997	69.6	25	69.6	2389.13	3377	291020	115	136
sample Treatment	2022 5:30:55 PM;File Size: 1000722054 [Byte] (F057606)	2,3-bisphosphoglycerate-dependent phosphoglycerate mutase OS=Pediococcus pentosaceus (strain ATCC 25745 / CCUG 21536 / LMG 10740 / 183-1w) OX=278197 GN=gpmA PE=3 SV=1	Q03DJ1_PEDPA	gpmA	Uniprot_Pediococcus_pentosaceus_strain_ATCC.fasta	25898.8	1	11	14	67	0.00146	0.511	SYDVLPPLLDADDEGSAANDR	R	R	0.997	57.1	25	57.1	2233.03	3588	324634	116	136
sample Treatment	2022 5:30:55 PM;File Size: 1000722054 [Byte] (F057606)	2,3-bisphosphoglycerate-dependent phosphoglycerate mutase OS=Pediococcus pentosaceus (strain ATCC 25745 / CCUG 21536 / LMG 10740 / 183-1w) OX=278197 GN=gpmA PE=3 SV=1	Q03DJ1_PEDPA	gpmA	Uniprot_Pediococcus_pentosaceus_strain_ATCC.fasta	25898.8	1	11	14	67	0.00146	0.511	SYDVLPPLLDADDEGSAANDRR	R	Y	0.996	50	25	48.6	2389.13	3423.5	4616460	116	137
sample Treatment	2022 5:30:55 PM;File Size: 1000722054 [Byte] (F057606)	2,3-bisphosphoglycerate-dependent phosphoglycerate mutase OS=Pediococcus pentosaceus (strain ATCC 25745 / CCUG 21536 / LMG 10740 / 183-1w) OX=278197 GN=gpmA PE=3 SV=1	Q03DJ1_PEDPA	gpmA	Uniprot_Pediococcus_pentosaceus_strain_ATCC.fasta	25898.8	1	11	14	67	0.00146	0.511	TLHYALEGSDQLWIPETK	K	T	0.997	74	25	74	2101.06	3384	2739250	64	81
sample Treatment	2022 5:30:55 PM;File Size: 1000722054 [Byte] (F057606)	2,3-bisphosphoglycerate-dependent phosphoglycerate mutase OS=Pediococcus pentosaceus (strain ATCC 25745 / CCUG 21536 / LMG 10740 / 183-1w) OX=278197 GN=gpmA PE=3 SV=1	Q03DJ1_PEDPA	gpmA	Uniprot_Pediococcus_pentosaceus_strain_ATCC.fasta	25898.8	1	11	14	67	0.00146	0.511	VIPFWEDEIAPK	R	L	0.997	67.5	25	67.5	1443.75	3611	3693590	159	170
sample Treatment	2022 5:30:55 PM;File Size: 1000722054 [Byte] (F057606)	2,3-bisphosphoglycerate-dependent phosphoglycerate mutase OS=Pediococcus pentosaceus (strain ATCC 25745 / CCUG 21536 / LMG 10740 / 183-1w) OX=278197 GN=gpmA PE=3 SV=1	Q03DJ1_PEDPA	gpmA	Uniprot_Pediococcus_pentosaceus_strain_ATCC.fasta	25898.8	1	11	14	67	0.00146	0.511	WGDDQVHTWR	K	R	0.997	62.2	25	62.2	1299.59	2372	257235	105	114
sample Treatment	2022 5:30:55 PM;File Size: 1000722054 [Byte] (F057606)	2,3-bisphosphoglycerate-dependent phosphoglycerate mutase OS=Pediococcus pentosaceus (strain ATCC 25745 / CCUG 21536 / LMG 10740 / 183-1w) OX=278197 GN=gpmA PE=3 SV=1	Q03DJ1_PEDPA	gpmA	Uniprot_Pediococcus_pentosaceus_strain_ATCC.fasta	25898.8	1	11	14	67	0.00146	0.511	YANLDPR	R	I	0.9	45.6	25	42.7	848.426	1846	2843930	138	144
sample Treatment	2022 5:30:55 PM;File Size: 1000722054 [Byte] (F057606)	Protein GrpE OS=Pediococcus pentosaceus (strain ATCC 25745 / CCUG 21536 / LMG 10740 / 183-1w) OX=278197 GN=grpE PE=3 SV=1	GRPE_PEDPA	grpE	Uniprot_Pediococcus_pentosaceus_strain_ATCC.fasta	21127.6	1	5	5	12	0.000261	0.274	AILPALDNLER	K	A	0.982	37.2	25	37.2	1224.69	3399.5	752336	93	103
sample Treatment	2022 5:30:55 PM;File Size: 1000722054 [Byte] (F057606)	Protein GrpE OS=Pediococcus pentosaceus (strain ATCC 25745 / CCUG 21536 / LMG 10740 / 183-1w) OX=278197 GN=grpE PE=3 SV=1	GRPE_PEDPA	grpE	Uniprot_Pediococcus_pentosaceus_strain_ATCC.fasta	21127.6	1	5	5	12	0.000261	0.274	ALAVESASEQLLK	R	G	0.997	64.1	25	64.1	1358.75	3104.5	424811	104	116
sample Treatment	2022 5:30:55 PM;File Size: 1000722054 [Byte] (F057606)	Protein GrpE OS=Pediococcus pentosaceus (strain ATCC 25745 / CCUG 21536 / LMG 10740 / 183-1w) OX=278197 GN=grpE PE=3 SV=1	GRPE_PEDPA	grpE	Uniprot_Pediococcus_pentosaceus_strain_ATCC.fasta	21127.6	1	5	5	12	0.000261	0.274	AQAEIVNMR	R	R	0.996	47.9	25	47.3	1031.53	2165.5	259130	64	72
sample Treatment	2022 5:30:55 PM;File Size: 1000722054 [Byte] (F057606)	Protein GrpE OS=Pediococcus pentosaceus (strain ATCC 25745 / CCUG 21536 / LMG 10740 / 183-1w) OX=278197 GN=grpE PE=3 SV=1	GRPE_PEDPA	grpE	Uniprot_Pediococcus_pentosaceus_strain_ATCC.fasta	21127.6	1	5	5	12	0.000261	0.274	MVQTDLLK	K	A	0.99	46	25	46	947.523	2497.5	274516	120	127
sample Treatment	2022 5:30:55 PM;File Size: 1000722054 [Byte] (F057606)	Protein GrpE OS=Pediococcus pentosaceus (strain ATCC 25745 / CCUG 21536 / LMG 10740 / 183-1w) OX=278197 GN=grpE PE=3 SV=1	GRPE_PEDPA	grpE	Uniprot_Pediococcus_pentosaceus_strain_ATCC.fasta	21127.6	1	5	5	12	0.000261	0.274	VLRPAMVIVAQ	R	-	0.994	44.9	25	44.9	1196.72	2920.5	203304	180	190
sample Treatment	2022 5:30:55 PM;File Size: 1000722054 [Byte] (F057606)	Probable phosphoketolase OS=Pediococcus pentosaceus (strain ATCC 25745 / CCUG 21536 / LMG 10740 / 183-1w) OX=278197 GN=PEPE_0353 PE=3 SV=1	PHK_PEDPA	PEPE_0353	Uniprot_Pediococcus_pentosaceus_strain_ATCC.fasta	89727.1	1	20	21	42	0.000913	0.316	AANYLSVGQLYLK	R	D	0.997	58.3	25	58.3	1439.79	3415	254854	19	31
sample Treatment	2022 5:30:55 PM;File Size: 1000722054 [Byte] (F057606)	Probable phosphoketolase OS=Pediococcus pentosaceus (strain ATCC 25745 / CCUG 21536 / LMG 10740 / 183-1w) OX=278197 GN=PEPE_0353 PE=3 SV=1	PHK_PEDPA	PEPE_0353	Uniprot_Pediococcus_pentosaceus_strain_ATCC.fasta	89727.1	1	20	21	42	0.000913	0.316	DNGDDLPEVTNWTWK	R	D	0.992	43.3	25	43.3	1789.8	3564	163788	770	784
sample Treatment	2022 5:30:55 PM;File Size: 1000722054 [Byte] (F057606)	Probable phosphoketolase OS=Pediococcus pentosaceus (strain ATCC 25745 / CCUG 21536 / LMG 10740 / 183-1w) OX=278197 GN=PEPE_0353 PE=3 SV=1	PHK_PEDPA	PEPE_0353	Uniprot_Pediococcus_pentosaceus_strain_ATCC.fasta	89727.1	1	20	21	42	0.000913	0.316	DWDEALAPEGR	K	I	0.98	36.6	25	36.6	1258.57	2704.5	235689	443	453
sample Treatment	2022 5:30:55 PM;File Size: 1000722054 [Byte] (F057606)	Probable phosphoketolase OS=Pediococcus pentosaceus (strain ATCC 25745 / CCUG 21536 / LMG 10740 / 183-1w) OX=278197 GN=PEPE_0353 PE=3 SV=1	PHK_PEDPA	PEPE_0353	Uniprot_Pediococcus_pentosaceus_strain_ATCC.fasta	89727.1	1	20	21	42	0.000913	0.316	EEGDITTPFDMR	R	V	0.91	28.5	25	28.5	1410.62	3009	98856.1	714	725
sample Treatment	2022 5:30:55 PM;File Size: 1000722054 [Byte] (F057606)	Probable phosphoketolase OS=Pediococcus pentosaceus (strain ATCC 25745 / CCUG 21536 / LMG 10740 / 183-1w) OX=278197 GN=PEPE_0353 PE=3 SV=1	PHK_PEDPA	PEPE_0353	Uniprot_Pediococcus_pentosaceus_strain_ATCC.fasta	89727.1	1	20	21	42	0.000913	0.316	FHLAQDTINSIPEFAEK	R	G	0.997	64.3	25	64.3	1959.98	3306.5	286281	733	749
sample Treatment	2022 5:30:55 PM;File Size: 1000722054 [Byte] (F057606)	Probable phosphoketolase OS=Pediococcus pentosaceus (strain ATCC 25745 / CCUG 21536 / LMG 10740 / 183-1w) OX=278197 GN=PEPE_0353 PE=3 SV=1	PHK_PEDPA	PEPE_0353	Uniprot_Pediococcus_pentosaceus_strain_ATCC.fasta	89727.1	1	20	21	42	0.000913	0.316	GADFSQQMDNTLER	K	H	0.997	78.9	25	78.9	1611.71	2739.5	118883	750	763
sample Treatment	2022 5:30:55 PM;File Size: 1000722054 [Byte] (F057606)	Probable phosphoketolase OS=Pediococcus pentosaceus (strain ATCC 25745 / CCUG 21536 / LMG 10740 / 183-1w) OX=278197 GN=PEPE_0353 PE=3 SV=1	PHK_PEDPA	PEPE_0353	Uniprot_Pediococcus_pentosaceus_strain_ATCC.fasta	89727.1	1	20	21	42	0.000913	0.316	HGIFTSYEAFLR	R	V	0.993	44.4	25	44.4	1440.73	3500.5	272835	477	488
sample Treatment	2022 5:30:55 PM;File Size: 1000722054 [Byte] (F057606)	Probable phosphoketolase OS=Pediococcus pentosaceus (strain ATCC 25745 / CCUG 21536 / LMG 10740 / 183-1w) OX=278197 GN=PEPE_0353 PE=3 SV=1	PHK_PEDPA	PEPE_0353	Uniprot_Pediococcus_pentosaceus_strain_ATCC.fasta	89727.1	1	20	21	42	0.000913	0.316	ILDAQLSEHSAEGWLETYTLTGR	R	H	0.997	111	25	111	2590.28	3772.5	155482	454	476
sample Treatment	2022 5:30:55 PM;File Size: 1000722054 [Byte] (F057606)	Probable phosphoketolase OS=Pediococcus pentosaceus (strain ATCC 25745 / CCUG 21536 / LMG 10740 / 183-1w) OX=278197 GN=PEPE_0353 PE=3 SV=1	PHK_PEDPA	PEPE_0353	Uniprot_Pediococcus_pentosaceus_strain_ATCC.fasta	89727.1	1	20	21	42	0.000913	0.316	INLIIASK	K	Q	0.99	50.7	25	47.9	871.561	2753.5	289406	576	583
sample Treatment	2022 5:30:55 PM;File Size: 1000722054 [Byte] (F057606)	Probable phosphoketolase OS=Pediococcus pentosaceus (strain ATCC 25745 / CCUG 21536 / LMG 10740 / 183-1w) OX=278197 GN=PEPE_0353 PE=3 SV=1	PHK_PEDPA	PEPE_0353	Uniprot_Pediococcus_pentosaceus_strain_ATCC.fasta	89727.1	1	20	21	42	0.000913	0.316	KADELDWR	R	N	0.922	29.2	25	29.2	1032.51	2226	87433.6	503	510
sample Treatment	2022 5:30:55 PM;File Size: 1000722054 [Byte] (F057606)	Probable phosphoketolase OS=Pediococcus pentosaceus (strain ATCC 25745 / CCUG 21536 / LMG 10740 / 183-1w) OX=278197 GN=PEPE_0353 PE=3 SV=1	PHK_PEDPA	PEPE_0353	Uniprot_Pediococcus_pentosaceus_strain_ATCC.fasta	89727.1	1	20	21	42	0.000913	0.316	LSNPSLTSR	K	M	0.993	44.3	25	44.3	974.527	1875.5	226349	207	215
sample Treatment	2022 5:30:55 PM;File Size: 1000722054 [Byte] (F057606)	Probable phosphoketolase OS=Pediococcus pentosaceus (strain ATCC 25745 / CCUG 21536 / LMG 10740 / 183-1w) OX=278197 GN=PEPE_0353 PE=3 SV=1	PHK_PEDPA	PEPE_0353	Uniprot_Pediococcus_pentosaceus_strain_ATCC.fasta	89727.1	1	20	21	42	0.000913	0.316	LYGLFEVTNR	R	Q	0.996	49.2	25	49.2	1211.64	3321.5	311670	425	434
sample Treatment	2022 5:30:55 PM;File Size: 1000722054 [Byte] (F057606)	Probable phosphoketolase OS=Pediococcus pentosaceus (strain ATCC 25745 / CCUG 21536 / LMG 10740 / 183-1w) OX=278197 GN=PEPE_0353 PE=3 SV=1	PHK_PEDPA	PEPE_0353	Uniprot_Pediococcus_pentosaceus_strain_ATCC.fasta	89727.1	1	20	21	42	0.000913	0.316	MFGPDETMSNR	R	L	0.996	49	25	49	1284.53	2341.5	127299	414	424
sample Treatment	2022 5:30:55 PM;File Size: 1000722054 [Byte] (F057606)	Probable phosphoketolase OS=Pediococcus pentosaceus (strain ATCC 25745 / CCUG 21536 / LMG 10740 / 183-1w) OX=278197 GN=PEPE_0353 PE=3 SV=1	PHK_PEDPA	PEPE_0353	Uniprot_Pediococcus_pentosaceus_strain_ATCC.fasta	89727.1	1	20	21	42	0.000913	0.316	NLEHVDALIDWMK	K	S	0.974	35	25	35	1583.79	3743.5	88452	315	327
sample Treatment	2022 5:30:55 PM;File Size: 1000722054 [Byte] (F057606)	Probable phosphoketolase OS=Pediococcus pentosaceus (strain ATCC 25745 / CCUG 21536 / LMG 10740 / 183-1w) OX=278197 GN=PEPE_0353 PE=3 SV=1	PHK_PEDPA	PEPE_0353	Uniprot_Pediococcus_pentosaceus_strain_ATCC.fasta	89727.1	1	20	21	42	0.000913	0.316	SYKPEELFDENGR	K	V	0.985	38.6	25	38.6	1583.73	2651.5	208893	328	340
sample Treatment	2022 5:30:55 PM;File Size: 1000722054 [Byte] (F057606)	Probable phosphoketolase OS=Pediococcus pentosaceus (strain ATCC 25745 / CCUG 21536 / LMG 10740 / 183-1w) OX=278197 GN=PEPE_0353 PE=3 SV=1	PHK_PEDPA	PEPE_0353	Uniprot_Pediococcus_pentosaceus_strain_ATCC.fasta	89727.1	1	20	21	42	0.000913	0.316	VHPIGHWGTIPGQNYIYAHLNR	K	V	0.99	28	25	28	2543.31	3206	215403	47	68
sample Treatment	2022 5:30:55 PM;File Size: 1000722054 [Byte] (F057606)	Probable phosphoketolase OS=Pediococcus pentosaceus (strain ATCC 25745 / CCUG 21536 / LMG 10740 / 183-1w) OX=278197 GN=PEPE_0353 PE=3 SV=1	PHK_PEDPA	PEPE_0353	Uniprot_Pediococcus_pentosaceus_strain_ATCC.fasta	89727.1	1	20	21	42	0.000913	0.316	VIEGTFR	K	A	0.9	46.3	25	35.8	821.452	1980.5	194521	297	303
sample Treatment	2022 5:30:55 PM;File Size: 1000722054 [Byte] (F057606)	Probable phosphoketolase OS=Pediococcus pentosaceus (strain ATCC 25745 / CCUG 21536 / LMG 10740 / 183-1w) OX=278197 GN=PEPE_0353 PE=3 SV=1	PHK_PEDPA	PEPE_0353	Uniprot_Pediococcus_pentosaceus_strain_ATCC.fasta	89727.1	1	20	21	42	0.000913	0.316	VLNELDR	R	F	0.9	35.5	25	34.1	858.468	1991.5	370767	726	732
sample Treatment	2022 5:30:55 PM;File Size: 1000722054 [Byte] (F057606)	Probable phosphoketolase OS=Pediococcus pentosaceus (strain ATCC 25745 / CCUG 21536 / LMG 10740 / 183-1w) OX=278197 GN=PEPE_0353 PE=3 SV=1	PHK_PEDPA	PEPE_0353	Uniprot_Pediococcus_pentosaceus_strain_ATCC.fasta	89727.1	1	20	21	42	0.000913	0.316	VLPEIAEIAPK	R	G	0.997	65.7	25	65.7	1179.7	3155	506968	341	351
sample Treatment	2022 5:30:55 PM;File Size: 1000722054 [Byte] (F057606)	Probable phosphoketolase OS=Pediococcus pentosaceus (strain ATCC 25745 / CCUG 21536 / LMG 10740 / 183-1w) OX=278197 GN=PEPE_0353 PE=3 SV=1	PHK_PEDPA	PEPE_0353	Uniprot_Pediococcus_pentosaceus_strain_ATCC.fasta	89727.1	1	20	21	42	0.000913	0.316	VNPNGLSDEEFDR	K	Y	0.997	51.1	25	51.1	1491.67	2433.5	170070	664	676
sample Treatment	2022 5:30:55 PM;File Size: 1000722054 [Byte] (F057606)	tRNA pseudouridine synthase B OS=Pediococcus pentosaceus (strain ATCC 25745 / CCUG 21536 / LMG 10740 / 183-1w) OX=278197 GN=truB PE=3 SV=1	TRUB_PEDPA	truB	Uniprot_Pediococcus_pentosaceus_strain_ATCC.fasta	33454	0.601	1	1	2	4.35e-05	0.0268	TLAVDFGR	R	H	0.966	33.4	25	20.7	878.473	2614.5	69952.5	181	188
sample Treatment	2022 5:30:55 PM;File Size: 1000722054 [Byte] (F057606)	Probable D-serine dehydratase OS=Pediococcus pentosaceus (strain ATCC 25745 / CCUG 21536 / LMG 10740 / 183-1w) OX=278197 GN=dsdA PE=3 SV=1	SDHD_PEDPA	dsdA	Uniprot_Pediococcus_pentosaceus_strain_ATCC.fasta	47550.1	1	2	2	3	6.52e-05	0.0556	ADNYLPISGSIK	K	S	0.939	30.3	25	30.3	1277.67	2885	96010.8	101	112
sample Treatment	2022 5:30:55 PM;File Size: 1000722054 [Byte] (F057606)	Probable D-serine dehydratase OS=Pediococcus pentosaceus (strain ATCC 25745 / CCUG 21536 / LMG 10740 / 183-1w) OX=278197 GN=dsdA PE=3 SV=1	SDHD_PEDPA	dsdA	Uniprot_Pediococcus_pentosaceus_strain_ATCC.fasta	47550.1	1	2	2	3	6.52e-05	0.0556	AVLNAEAQNQVK	K	G	0.997	58.9	25	58.9	1284.69	1919.5	145633	83	94
sample Treatment	2022 5:30:55 PM;File Size: 1000722054 [Byte] (F057606)	50S ribosomal protein L15 OS=Pediococcus pentosaceus (strain ATCC 25745 / CCUG 21536 / LMG 10740 / 183-1w) OX=278197 GN=rplO PE=3 SV=1	RL15_PEDPA	rplO	Uniprot_Pediococcus_pentosaceus_strain_ATCC.fasta	15444.5	1	6	7	18	0.000391	0.326	FSESAVK	K	A	0.9	38.2	25	34.8	767.393	1628	829241	126	132
sample Treatment	2022 5:30:55 PM;File Size: 1000722054 [Byte] (F057606)	50S ribosomal protein L15 OS=Pediococcus pentosaceus (strain ATCC 25745 / CCUG 21536 / LMG 10740 / 183-1w) OX=278197 GN=rplO PE=3 SV=1	RL15_PEDPA	rplO	Uniprot_Pediococcus_pentosaceus_strain_ATCC.fasta	15444.5	1	6	7	18	0.000391	0.326	GFTNINR	R	K	0.9	29.8	25	29.8	821.426	1868	933006	63	69
sample Treatment	2022 5:30:55 PM;File Size: 1000722054 [Byte] (F057606)	50S ribosomal protein L15 OS=Pediococcus pentosaceus (strain ATCC 25745 / CCUG 21536 / LMG 10740 / 183-1w) OX=278197 GN=rplO PE=3 SV=1	RL15_PEDPA	rplO	Uniprot_Pediococcus_pentosaceus_strain_ATCC.fasta	15444.5	1	6	7	18	0.000391	0.326	LGFEGGQMPLYR	R	R	0.997	82.5	25	82.5	1367.68	3147	1243190	46	57
sample Treatment	2022 5:30:55 PM;File Size: 1000722054 [Byte] (F057606)	50S ribosomal protein L15 OS=Pediococcus pentosaceus (strain ATCC 25745 / CCUG 21536 / LMG 10740 / 183-1w) OX=278197 GN=rplO PE=3 SV=1	RL15_PEDPA	rplO	Uniprot_Pediococcus_pentosaceus_strain_ATCC.fasta	15444.5	1	6	7	18	0.000391	0.326	LNELMPSEGSR	K	T	0.997	51.5	25	51.5	1232.59	2241	1694840	3	13
sample Treatment	2022 5:30:55 PM;File Size: 1000722054 [Byte] (F057606)	50S ribosomal protein L15 OS=Pediococcus pentosaceus (strain ATCC 25745 / CCUG 21536 / LMG 10740 / 183-1w) OX=278197 GN=rplO PE=3 SV=1	RL15_PEDPA	rplO	Uniprot_Pediococcus_pentosaceus_strain_ATCC.fasta	15444.5	1	6	7	18	0.000391	0.326	RGFTNINR	K	K	0.96	32.5	25	19.6	977.528	1702	170302	62	69
sample Treatment	2022 5:30:55 PM;File Size: 1000722054 [Byte] (F057606)	50S ribosomal protein L15 OS=Pediococcus pentosaceus (strain ATCC 25745 / CCUG 21536 / LMG 10740 / 183-1w) OX=278197 GN=rplO PE=3 SV=1	RL15_PEDPA	rplO	Uniprot_Pediococcus_pentosaceus_strain_ATCC.fasta	15444.5	1	6	7	18	0.000391	0.326	VLGNGEITK	K	K	0.975	35	25	35	930.526	1849	318015	109	117
sample Treatment	2022 5:30:55 PM;File Size: 1000722054 [Byte] (F057606)	Xaa-Pro aminopeptidase, Metallo peptidase, MEROPS family M24B OS=Pediococcus pentosaceus (strain ATCC 25745 / CCUG 21536 / LMG 10740 / 183-1w) OX=278197 GN=PEPE_1251 PE=4 SV=1	Q03ET0_PEDPA	PEPE_1251	Uniprot_Pediococcus_pentosaceus_strain_ATCC.fasta	40600.4	1	3	3	5	0.000109	0.107	AGYGEYFIHR	K	L	0.989	40.8	25	40.8	1212.58	2582	64583.8	286	295
sample Treatment	2022 5:30:55 PM;File Size: 1000722054 [Byte] (F057606)	Xaa-Pro aminopeptidase, Metallo peptidase, MEROPS family M24B OS=Pediococcus pentosaceus (strain ATCC 25745 / CCUG 21536 / LMG 10740 / 183-1w) OX=278197 GN=PEPE_1251 PE=4 SV=1	Q03ET0_PEDPA	PEPE_1251	Uniprot_Pediococcus_pentosaceus_strain_ATCC.fasta	40600.4	1	3	3	5	0.000109	0.107	FEQNLTPVFEK	K	L	0.988	39.6	25	39.6	1351.69	2913.5	161031	124	134
sample Treatment	2022 5:30:55 PM;File Size: 1000722054 [Byte] (F057606)	Xaa-Pro aminopeptidase, Metallo peptidase, MEROPS family M24B OS=Pediococcus pentosaceus (strain ATCC 25745 / CCUG 21536 / LMG 10740 / 183-1w) OX=278197 GN=PEPE_1251 PE=4 SV=1	Q03ET0_PEDPA	PEPE_1251	Uniprot_Pediococcus_pentosaceus_strain_ATCC.fasta	40600.4	1	3	3	5	0.000109	0.107	NANPIHWGIENNNLTFDR	R	Y	0.997	54.6	25	54.6	2125.02	3288.5	136301	94	111
sample Treatment	2022 5:30:55 PM;File Size: 1000722054 [Byte] (F057606)	Cyclic-di-AMP phosphodiesterase OS=Pediococcus pentosaceus (strain ATCC 25745 / CCUG 21536 / LMG 10740 / 183-1w) OX=278197 GN=PEPE_0010 PE=3 SV=1	Q03I51_PEDPA	PEPE_0010	Uniprot_Pediococcus_pentosaceus_strain_ATCC.fasta	75080.1	1	3	3	4	8.7e-05	0.0511	LADVSQSNLDLALGR	K	G	0.997	90.4	25	90.4	1571.84	3077	117786	286	300
sample Treatment	2022 5:30:55 PM;File Size: 1000722054 [Byte] (F057606)	Cyclic-di-AMP phosphodiesterase OS=Pediococcus pentosaceus (strain ATCC 25745 / CCUG 21536 / LMG 10740 / 183-1w) OX=278197 GN=PEPE_0010 PE=3 SV=1	Q03I51_PEDPA	PEPE_0010	Uniprot_Pediococcus_pentosaceus_strain_ATCC.fasta	75080.1	1	3	3	4	8.7e-05	0.0511	LVDHLPAFIR	K	N	0.984	38.2	25	38.2	1180.68	3113	26765.7	3	12
sample Treatment	2022 5:30:55 PM;File Size: 1000722054 [Byte] (F057606)	Cyclic-di-AMP phosphodiesterase OS=Pediococcus pentosaceus (strain ATCC 25745 / CCUG 21536 / LMG 10740 / 183-1w) OX=278197 GN=PEPE_0010 PE=3 SV=1	Q03I51_PEDPA	PEPE_0010	Uniprot_Pediococcus_pentosaceus_strain_ATCC.fasta	75080.1	1	3	3	4	8.7e-05	0.0511	TFDAASYLR	R	S	0.988	39.6	25	39.6	1043.52	2888	85631.3	522	530
sample Treatment	2022 5:30:55 PM;File Size: 1000722054 [Byte] (F057606)	DNA mismatch repair protein MutL OS=Pediococcus pentosaceus (strain ATCC 25745 / CCUG 21536 / LMG 10740 / 183-1w) OX=278197 GN=mutL PE=3 SV=1	MUTL_PEDPA	mutL	Uniprot_Pediococcus_pentosaceus_strain_ATCC.fasta	72567.9	1	2	2	2	4.35e-05	0.0341	IDILLEESGLK	R	M	0.991	42.4	25	36.1	1229.7	3309	53369.6	43	53
sample Treatment	2022 5:30:55 PM;File Size: 1000722054 [Byte] (F057606)	DNA mismatch repair protein MutL OS=Pediococcus pentosaceus (strain ATCC 25745 / CCUG 21536 / LMG 10740 / 183-1w) OX=278197 GN=mutL PE=3 SV=1	MUTL_PEDPA	mutL	Uniprot_Pediococcus_pentosaceus_strain_ATCC.fasta	72567.9	1	2	2	2	4.35e-05	0.0341	VSSSEQLDLAR	K	M	0.997	63.7	25	63.7	1204.62	2211	66096.2	345	355
sample Treatment	2022 5:30:55 PM;File Size: 1000722054 [Byte] (F057606)	Predicted HD superfamily hydrolase OS=Pediococcus pentosaceus (strain ATCC 25745 / CCUG 21536 / LMG 10740 / 183-1w) OX=278197 GN=PEPE_1447 PE=4 SV=1	Q03E94_PEDPA	PEPE_1447	Uniprot_Pediococcus_pentosaceus_strain_ATCC.fasta	24963.9	1	4	4	7	0.000152	0.247	LDAIGAIGIAR	R	T	0.997	50.7	25	50.7	1069.64	3003	103402	129	139
sample Treatment	2022 5:30:55 PM;File Size: 1000722054 [Byte] (F057606)	Predicted HD superfamily hydrolase OS=Pediococcus pentosaceus (strain ATCC 25745 / CCUG 21536 / LMG 10740 / 183-1w) OX=278197 GN=PEPE_1447 PE=4 SV=1	Q03E94_PEDPA	PEPE_1447	Uniprot_Pediococcus_pentosaceus_strain_ATCC.fasta	24963.9	1	4	4	7	0.000152	0.247	LQDDLTGHDYAHIQR	K	V	0.995	34.3	25	34.3	1781.86	2265.5	136970	20	34
sample Treatment	2022 5:30:55 PM;File Size: 1000722054 [Byte] (F057606)	Predicted HD superfamily hydrolase OS=Pediococcus pentosaceus (strain ATCC 25745 / CCUG 21536 / LMG 10740 / 183-1w) OX=278197 GN=PEPE_1447 PE=4 SV=1	Q03E94_PEDPA	PEPE_1447	Uniprot_Pediococcus_pentosaceus_strain_ATCC.fasta	24963.9	1	4	4	7	0.000152	0.247	LSLEGQIVQDADR	K	L	0.997	64.8	25	64.8	1443.74	3019	118307	116	128
sample Treatment	2022 5:30:55 PM;File Size: 1000722054 [Byte] (F057606)	Predicted HD superfamily hydrolase OS=Pediococcus pentosaceus (strain ATCC 25745 / CCUG 21536 / LMG 10740 / 183-1w) OX=278197 GN=PEPE_1447 PE=4 SV=1	Q03E94_PEDPA	PEPE_1447	Uniprot_Pediococcus_pentosaceus_strain_ATCC.fasta	24963.9	1	4	4	7	0.000152	0.247	LVENQAVAENEVAR	K	F	0.997	50.9	25	50.9	1541.79	2099.5	134393	69	82
sample Treatment	2022 5:30:55 PM;File Size: 1000722054 [Byte] (F057606)	Glutamine--fructose-6-phosphate aminotransferase [isomerizing] OS=Pediococcus pentosaceus (strain ATCC 25745 / CCUG 21536 / LMG 10740 / 183-1w) OX=278197 GN=glmS PE=3 SV=1	Q03GU9_PEDPA	glmS	Uniprot_Pediococcus_pentosaceus_strain_ATCC.fasta	66284.1	1	13	13	23	0.0005	0.321	ADTTNLLVNGLK	R	K	0.997	93.1	25	93.1	1258.7	2979.5	146378	11	22
sample Treatment	2022 5:30:55 PM;File Size: 1000722054 [Byte] (F057606)	Glutamine--fructose-6-phosphate aminotransferase [isomerizing] OS=Pediococcus pentosaceus (strain ATCC 25745 / CCUG 21536 / LMG 10740 / 183-1w) OX=278197 GN=glmS PE=3 SV=1	Q03GU9_PEDPA	glmS	Uniprot_Pediococcus_pentosaceus_strain_ATCC.fasta	66284.1	1	13	13	23	0.0005	0.321	AGMDTEQAFK	K	K	0.997	50	25	50	1097.49	2088.5	139640	138	147
sample Treatment	2022 5:30:55 PM;File Size: 1000722054 [Byte] (F057606)	Glutamine--fructose-6-phosphate aminotransferase [isomerizing] OS=Pediococcus pentosaceus (strain ATCC 25745 / CCUG 21536 / LMG 10740 / 183-1w) OX=278197 GN=glmS PE=3 SV=1	Q03GU9_PEDPA	glmS	Uniprot_Pediococcus_pentosaceus_strain_ATCC.fasta	66284.1	1	13	13	23	0.0005	0.321	DSSYAFVLMDR	K	Q	0.997	50.6	25	50.6	1303.6	3335	66024.8	155	165
sample Treatment	2022 5:30:55 PM;File Size: 1000722054 [Byte] (F057606)	Glutamine--fructose-6-phosphate aminotransferase [isomerizing] OS=Pediococcus pentosaceus (strain ATCC 25745 / CCUG 21536 / LMG 10740 / 183-1w) OX=278197 GN=glmS PE=3 SV=1	Q03GU9_PEDPA	glmS	Uniprot_Pediococcus_pentosaceus_strain_ATCC.fasta	66284.1	1	13	13	23	0.0005	0.321	EADFSATLEAGPEIAVASTK	R	A	0.997	71.1	25	71.1	2006.99	3352.5	47594.9	384	403
sample Treatment	2022 5:30:55 PM;File Size: 1000722054 [Byte] (F057606)	Glutamine--fructose-6-phosphate aminotransferase [isomerizing] OS=Pediococcus pentosaceus (strain ATCC 25745 / CCUG 21536 / LMG 10740 / 183-1w) OX=278197 GN=glmS PE=3 SV=1	Q03GU9_PEDPA	glmS	Uniprot_Pediococcus_pentosaceus_strain_ATCC.fasta	66284.1	1	13	13	23	0.0005	0.321	EISYIQAEGFASGELK	K	H	0.981	36.9	25	36.9	1741.86	3277	116187	489	504
sample Treatment	2022 5:30:55 PM;File Size: 1000722054 [Byte] (F057606)	Glutamine--fructose-6-phosphate aminotransferase [isomerizing] OS=Pediococcus pentosaceus (strain ATCC 25745 / CCUG 21536 / LMG 10740 / 183-1w) OX=278197 GN=glmS PE=3 SV=1	Q03GU9_PEDPA	glmS	Uniprot_Pediococcus_pentosaceus_strain_ATCC.fasta	66284.1	1	13	13	23	0.0005	0.321	EVDEQPAVIR	K	R	0.988	40	25	40	1155.6	2019.5	156109	257	266
sample Treatment	2022 5:30:55 PM;File Size: 1000722054 [Byte] (F057606)	Glutamine--fructose-6-phosphate aminotransferase [isomerizing] OS=Pediococcus pentosaceus (strain ATCC 25745 / CCUG 21536 / LMG 10740 / 183-1w) OX=278197 GN=glmS PE=3 SV=1	Q03GU9_PEDPA	glmS	Uniprot_Pediococcus_pentosaceus_strain_ATCC.fasta	66284.1	1	13	13	23	0.0005	0.321	GLDYNVALESSLK	R	L	0.997	64.6	25	64.6	1408.73	3108	273377	474	486
sample Treatment	2022 5:30:55 PM;File Size: 1000722054 [Byte] (F057606)	Glutamine--fructose-6-phosphate aminotransferase [isomerizing] OS=Pediococcus pentosaceus (strain ATCC 25745 / CCUG 21536 / LMG 10740 / 183-1w) OX=278197 GN=glmS PE=3 SV=1	Q03GU9_PEDPA	glmS	Uniprot_Pediococcus_pentosaceus_strain_ATCC.fasta	66284.1	1	13	13	23	0.0005	0.321	HGTIALIEDGTPVIGIITQSK	K	T	0.995	47.6	25	47.6	2163.2	3776	194184	505	525
sample Treatment	2022 5:30:55 PM;File Size: 1000722054 [Byte] (F057606)	Glutamine--fructose-6-phosphate aminotransferase [isomerizing] OS=Pediococcus pentosaceus (strain ATCC 25745 / CCUG 21536 / LMG 10740 / 183-1w) OX=278197 GN=glmS PE=3 SV=1	Q03GU9_PEDPA	glmS	Uniprot_Pediococcus_pentosaceus_strain_ATCC.fasta	66284.1	1	13	13	23	0.0005	0.321	LYIVGAGTSYHAGLVGK	K	K	0.997	55.8	25	55.8	1705.93	2874.5	347683	295	311
sample Treatment	2022 5:30:55 PM;File Size: 1000722054 [Byte] (F057606)	Glutamine--fructose-6-phosphate aminotransferase [isomerizing] OS=Pediococcus pentosaceus (strain ATCC 25745 / CCUG 21536 / LMG 10740 / 183-1w) OX=278197 GN=glmS PE=3 SV=1	Q03GU9_PEDPA	glmS	Uniprot_Pediococcus_pentosaceus_strain_ATCC.fasta	66284.1	1	13	13	23	0.0005	0.321	SNLQEVLSR	R	G	0.993	44.4	25	44.4	1045.56	2550.5	258836	532	540
sample Treatment	2022 5:30:55 PM;File Size: 1000722054 [Byte] (F057606)	Glutamine--fructose-6-phosphate aminotransferase [isomerizing] OS=Pediococcus pentosaceus (strain ATCC 25745 / CCUG 21536 / LMG 10740 / 183-1w) OX=278197 GN=glmS PE=3 SV=1	Q03GU9_PEDPA	glmS	Uniprot_Pediococcus_pentosaceus_strain_ATCC.fasta	66284.1	1	13	13	23	0.0005	0.321	VANAIQTVVDEK	K	G	0.997	98.7	25	98.7	1286.7	2672.5	333013	440	451
sample Treatment	2022 5:30:55 PM;File Size: 1000722054 [Byte] (F057606)	Glutamine--fructose-6-phosphate aminotransferase [isomerizing] OS=Pediococcus pentosaceus (strain ATCC 25745 / CCUG 21536 / LMG 10740 / 183-1w) OX=278197 GN=glmS PE=3 SV=1	Q03GU9_PEDPA	glmS	Uniprot_Pediococcus_pentosaceus_strain_ATCC.fasta	66284.1	1	13	13	23	0.0005	0.321	VNDEWQKPSLTITNVANSTLAR	R	E	0.997	57.8	25	57.8	2457.27	3341	250941	362	383
sample Treatment	2022 5:30:55 PM;File Size: 1000722054 [Byte] (F057606)	Glutamine--fructose-6-phosphate aminotransferase [isomerizing] OS=Pediococcus pentosaceus (strain ATCC 25745 / CCUG 21536 / LMG 10740 / 183-1w) OX=278197 GN=glmS PE=3 SV=1	Q03GU9_PEDPA	glmS	Uniprot_Pediococcus_pentosaceus_strain_ATCC.fasta	66284.1	1	13	13	23	0.0005	0.321	WATHGVPSIENAHPHFSEDHR	R	F	0.997	34.7	25	34.7	2424.12	2459	205285	74	94
sample Treatment	2022 5:30:55 PM;File Size: 1000722054 [Byte] (F057606)	Periplasmic glycine betaine/choline-binding (Lipo)protein of an ABC-type transport system (Osmoprotectant binding protein) OS=Pediococcus pentosaceus (strain ATCC 25745 / CCUG 21536 / LMG 10740 / 183-1w) OX=278197 GN=PEPE_1653 PE=4 SV=1	Q03DP8_PEDPA	PEPE_1653	Uniprot_Pediococcus_pentosaceus_strain_ATCC.fasta	34804.6	1	2	2	2	4.35e-05	0.0649	TPEQVNAYVK	R	K	0.996	47.9	25	47.9	1148.59	2079	109091	108	117
sample Treatment	2022 5:30:55 PM;File Size: 1000722054 [Byte] (F057606)	Periplasmic glycine betaine/choline-binding (Lipo)protein of an ABC-type transport system (Osmoprotectant binding protein) OS=Pediococcus pentosaceus (strain ATCC 25745 / CCUG 21536 / LMG 10740 / 183-1w) OX=278197 GN=PEPE_1653 PE=4 SV=1	Q03DP8_PEDPA	PEPE_1653	Uniprot_Pediococcus_pentosaceus_strain_ATCC.fasta	34804.6	1	2	2	2	4.35e-05	0.0649	VGIDQTWLSR	K	K	0.997	71.9	25	65.6	1174.62	2986	65812.8	167	176
sample Treatment	2022 5:30:55 PM;File Size: 1000722054 [Byte] (F057606)	Uncharacterized protein OS=Pediococcus pentosaceus (strain ATCC 25745 / CCUG 21536 / LMG 10740 / 183-1w) OX=278197 GN=PEPE_1253 PE=4 SV=1	Q03ES8_PEDPA	PEPE_1253	Uniprot_Pediococcus_pentosaceus_strain_ATCC.fasta	12843	1	2	2	4	8.7e-05	0.164	AVSSVDDLK	R	Q	0.997	50.4	25	42.9	933.489	1914.5	356830	58	66
sample Treatment	2022 5:30:55 PM;File Size: 1000722054 [Byte] (F057606)	Uncharacterized protein OS=Pediococcus pentosaceus (strain ATCC 25745 / CCUG 21536 / LMG 10740 / 183-1w) OX=278197 GN=PEPE_1253 PE=4 SV=1	Q03ES8_PEDPA	PEPE_1253	Uniprot_Pediococcus_pentosaceus_strain_ATCC.fasta	12843	1	2	2	4	8.7e-05	0.164	LTDTTPQQLK	K	E	0.992	43.2	25	43.2	1144.62	1910.5	302601	24	33
sample Treatment	2022 5:30:55 PM;File Size: 1000722054 [Byte] (F057606)	Nucleoid-associated protein PEPE_1483 OS=Pediococcus pentosaceus (strain ATCC 25745 / CCUG 21536 / LMG 10740 / 183-1w) OX=278197 GN=PEPE_1483 PE=3 SV=1	Y1483_PEDPA	PEPE_1483	Uniprot_Pediococcus_pentosaceus_strain_ATCC.fasta	11727.4	0.95	1	1	2	4.35e-05	0.154	LNQTEFTGVAPDDMVK	K	V	0.997	74.9	25	74.9	1764.85	2925	53758.8	29	44
sample Treatment	2022 5:30:55 PM;File Size: 1000722054 [Byte] (F057606)	Transcriptional regulator OS=Pediococcus pentosaceus (strain ATCC 25745 / CCUG 21536 / LMG 10740 / 183-1w) OX=278197 GN=PEPE_0591 PE=3 SV=1	Q03GJ3_PEDPA	PEPE_0591	Uniprot_Pediococcus_pentosaceus_strain_ATCC.fasta	37158.8	1	7	7	11	0.000239	0.275	DFIDSISNETK	K	T	0.996	49.9	25	49.9	1268.6	2943.5	242708	241	251
sample Treatment	2022 5:30:55 PM;File Size: 1000722054 [Byte] (F057606)	Transcriptional regulator OS=Pediococcus pentosaceus (strain ATCC 25745 / CCUG 21536 / LMG 10740 / 183-1w) OX=278197 GN=PEPE_0591 PE=3 SV=1	Q03GJ3_PEDPA	PEPE_0591	Uniprot_Pediococcus_pentosaceus_strain_ATCC.fasta	37158.8	1	7	7	11	0.000239	0.275	INAAYAFGQAGTAIK	K	T	0.995	48.3	25	48.3	1495.79	2955	64701.2	126	140
sample Treatment	2022 5:30:55 PM;File Size: 1000722054 [Byte] (F057606)	Transcriptional regulator OS=Pediococcus pentosaceus (strain ATCC 25745 / CCUG 21536 / LMG 10740 / 183-1w) OX=278197 GN=PEPE_0591 PE=3 SV=1	Q03GJ3_PEDPA	PEPE_0591	Uniprot_Pediococcus_pentosaceus_strain_ATCC.fasta	37158.8	1	7	7	11	0.000239	0.275	NAVDNTYSSAGIK	K	K	0.997	68	25	68	1339.65	2055.5	217082	40	52
sample Treatment	2022 5:30:55 PM;File Size: 1000722054 [Byte] (F057606)	Transcriptional regulator OS=Pediococcus pentosaceus (strain ATCC 25745 / CCUG 21536 / LMG 10740 / 183-1w) OX=278197 GN=PEPE_0591 PE=3 SV=1	Q03GJ3_PEDPA	PEPE_0591	Uniprot_Pediococcus_pentosaceus_strain_ATCC.fasta	37158.8	1	7	7	11	0.000239	0.275	TDSMMVVTINPK	R	T	0.997	51.6	25	51.6	1335.66	2848	60822.1	87	98
sample Treatment	2022 5:30:55 PM;File Size: 1000722054 [Byte] (F057606)	Transcriptional regulator OS=Pediococcus pentosaceus (strain ATCC 25745 / CCUG 21536 / LMG 10740 / 183-1w) OX=278197 GN=PEPE_0591 PE=3 SV=1	Q03GJ3_PEDPA	PEPE_0591	Uniprot_Pediococcus_pentosaceus_strain_ATCC.fasta	37158.8	1	7	7	11	0.000239	0.275	TTITSIPR	K	D	0.99	61.4	25	55.6	888.515	2147.5	286047	102	109
sample Treatment	2022 5:30:55 PM;File Size: 1000722054 [Byte] (F057606)	Transcriptional regulator OS=Pediococcus pentosaceus (strain ATCC 25745 / CCUG 21536 / LMG 10740 / 183-1w) OX=278197 GN=PEPE_0591 PE=3 SV=1	Q03GJ3_PEDPA	PEPE_0591	Uniprot_Pediococcus_pentosaceus_strain_ATCC.fasta	37158.8	1	7	7	11	0.000239	0.275	VVDEAGGVDITPTLSFTYDGYTFTK	K	G	0.918	29.1	25	29.1	2696.3	3852	32901.4	164	188
sample Treatment	2022 5:30:55 PM;File Size: 1000722054 [Byte] (F057606)	Transcriptional regulator OS=Pediococcus pentosaceus (strain ATCC 25745 / CCUG 21536 / LMG 10740 / 183-1w) OX=278197 GN=PEPE_0591 PE=3 SV=1	Q03GJ3_PEDPA	PEPE_0591	Uniprot_Pediococcus_pentosaceus_strain_ATCC.fasta	37158.8	1	7	7	11	0.000239	0.275	YDDPQNDYGR	R	Q	0.997	51	25	51	1242.5	1666.5	86334.2	207	216
sample Treatment	2022 5:30:55 PM;File Size: 1000722054 [Byte] (F057606)	Ribonuclease H OS=Pediococcus pentosaceus (strain ATCC 25745 / CCUG 21536 / LMG 10740 / 183-1w) OX=278197 GN=PEPE_0304 PE=3 SV=1	Q03HC1_PEDPA	PEPE_0304	Uniprot_Pediococcus_pentosaceus_strain_ATCC.fasta	30432.2	0.981	1	1	1	2.17e-05	0.0625	GHATNEGNVFVDQLLNK	K	T	0.937	30.4	25	30.4	1855.93	3368	52083.9	207	223
sample Treatment	2022 5:30:55 PM;File Size: 1000722054 [Byte] (F057606)	Uncharacterized membrane-bound protein conserved in bacteria OS=Pediococcus pentosaceus (strain ATCC 25745 / CCUG 21536 / LMG 10740 / 183-1w) OX=278197 GN=PEPE_1720 PE=4 SV=1	Q03DI1_PEDPA	PEPE_1720	Uniprot_Pediococcus_pentosaceus_strain_ATCC.fasta	26176.9	1	2	2	4	8.7e-05	0.0897	IEAQNNNMWIR	K	A	0.997	75.7	25	68.3	1388.67	2687.5	104416	96	106
sample Treatment	2022 5:30:55 PM;File Size: 1000722054 [Byte] (F057606)	Uncharacterized membrane-bound protein conserved in bacteria OS=Pediococcus pentosaceus (strain ATCC 25745 / CCUG 21536 / LMG 10740 / 183-1w) OX=278197 GN=PEPE_1720 PE=4 SV=1	Q03DI1_PEDPA	PEPE_1720	Uniprot_Pediococcus_pentosaceus_strain_ATCC.fasta	26176.9	1	2	2	4	8.7e-05	0.0897	SEALIDTETR	R	L	0.976	35.5	25	28.6	1134.56	2107.5	232215	53	62
sample Treatment	2022 5:30:55 PM;File Size: 1000722054 [Byte] (F057606)	Biotin carboxyl carrier protein of acetyl-CoA carboxylase OS=Pediococcus pentosaceus (strain ATCC 25745 / CCUG 21536 / LMG 10740 / 183-1w) OX=278197 GN=PEPE_0860 PE=4 SV=1	Q03FV3_PEDPA	PEPE_0860	Uniprot_Pediococcus_pentosaceus_strain_ATCC.fasta	15952.8	0.736	1	1	2	4.35e-05	0.137	APFVGVVYFAPSEGEDPYIK	K	V	0.981	37	25	37	2185.09	3770	42798.5	70	89
sample Treatment	2022 5:30:55 PM;File Size: 1000722054 [Byte] (F057606)	30S ribosomal protein S8 OS=Pediococcus pentosaceus (strain ATCC 25745 / CCUG 21536 / LMG 10740 / 183-1w) OX=278197 GN=rpsH PE=3 SV=1	RS8_PEDPA	rpsH	Uniprot_Pediococcus_pentosaceus_strain_ATCC.fasta	14823.2	0.949	1	1	2	4.35e-05	0.0758	HESLEVPASK	R	I	0.997	52.1	25	52.1	1096.56	1796.5	145690	22	31
sample Treatment	2022 5:30:55 PM;File Size: 1000722054 [Byte] (F057606)	Ribosomal protein L11 methyltransferase OS=Pediococcus pentosaceus (strain ATCC 25745 / CCUG 21536 / LMG 10740 / 183-1w) OX=278197 GN=prmA PE=3 SV=1	PRMA_PEDPA	prmA	Uniprot_Pediococcus_pentosaceus_strain_ATCC.fasta	34697.2	1	2	2	3	6.52e-05	0.0981	GGETLYDVGTGSGVLSIAAK	R	H	0.99	41.1	25	41.1	1894.98	3376	28917.9	176	195
sample Treatment	2022 5:30:55 PM;File Size: 1000722054 [Byte] (F057606)	Ribosomal protein L11 methyltransferase OS=Pediococcus pentosaceus (strain ATCC 25745 / CCUG 21536 / LMG 10740 / 183-1w) OX=278197 GN=prmA PE=3 SV=1	PRMA_PEDPA	prmA	Uniprot_Pediococcus_pentosaceus_strain_ATCC.fasta	34697.2	1	2	2	3	6.52e-05	0.0981	IENALDFENYR	K	A	0.997	63.7	25	63.7	1383.65	3038	150000	32	42
sample Treatment	2022 5:30:55 PM;File Size: 1000722054 [Byte] (F057606)	Nucleoside diphosphate kinase OS=Pediococcus pentosaceus (strain ATCC 25745 / CCUG 21536 / LMG 10740 / 183-1w) OX=278197 GN=PEPE_1644 PE=3 SV=1	Q03DQ7_PEDPA	PEPE_1644	Uniprot_Pediococcus_pentosaceus_strain_ATCC.fasta	16256.9	1	3	3	6	0.00013	0.31	MVNATEEQLR	K	Q	0.996	50	25	50	1190.58	2008.5	254330	39	48
sample Treatment	2022 5:30:55 PM;File Size: 1000722054 [Byte] (F057606)	Nucleoside diphosphate kinase OS=Pediococcus pentosaceus (strain ATCC 25745 / CCUG 21536 / LMG 10740 / 183-1w) OX=278197 GN=PEPE_1644 PE=3 SV=1	Q03DQ7_PEDPA	PEPE_1644	Uniprot_Pediococcus_pentosaceus_strain_ATCC.fasta	16256.9	1	3	3	6	0.00013	0.31	NVVHSSDSVESAEK	K	E	0.997	74.4	25	74.4	1487.7	1520	82955.5	118	131
sample Treatment	2022 5:30:55 PM;File Size: 1000722054 [Byte] (F057606)	Nucleoside diphosphate kinase OS=Pediococcus pentosaceus (strain ATCC 25745 / CCUG 21536 / LMG 10740 / 183-1w) OX=278197 GN=PEPE_1644 PE=3 SV=1	Q03DQ7_PEDPA	PEPE_1644	Uniprot_Pediococcus_pentosaceus_strain_ATCC.fasta	16256.9	1	3	3	6	0.00013	0.31	SLILVKPDGVQCGHIGHVISR	K	I	0.997	49.8	25	49.8	2285.26	2748	221037	6	26
sample Treatment	2022 5:30:55 PM;File Size: 1000722054 [Byte] (F057606)	Glycine--tRNA ligase alpha subunit OS=Pediococcus pentosaceus (strain ATCC 25745 / CCUG 21536 / LMG 10740 / 183-1w) OX=278197 GN=glyQ PE=3 SV=1	SYGA_PEDPA	glyQ	Uniprot_Pediococcus_pentosaceus_strain_ATCC.fasta	34356.8	1	2	2	3	6.52e-05	0.0936	AIGPEPWNAAYVEPSR	R	R	0.997	88.6	25	88.6	1756.87	3038.5	140528	46	61
sample Treatment	2022 5:30:55 PM;File Size: 1000722054 [Byte] (F057606)	Glycine--tRNA ligase alpha subunit OS=Pediococcus pentosaceus (strain ATCC 25745 / CCUG 21536 / LMG 10740 / 183-1w) OX=278197 GN=glyQ PE=3 SV=1	SYGA_PEDPA	glyQ	Uniprot_Pediococcus_pentosaceus_strain_ATCC.fasta	34356.8	1	2	2	3	6.52e-05	0.0936	ALGIDPLEHDIR	K	F	0.997	52.4	25	52.4	1348.72	2950	86830.6	102	113
sample Treatment	2022 5:30:55 PM;File Size: 1000722054 [Byte] (F057606)	Protein translocase subunit SecA 1 OS=Pediococcus pentosaceus (strain ATCC 25745 / CCUG 21536 / LMG 10740 / 183-1w) OX=278197 GN=secA1 PE=3 SV=1	SECA1_PEDPA	secA1	Uniprot_Pediococcus_pentosaceus_strain_ATCC.fasta	89512.7	1	20	23	43	0.000935	0.351	ALYDPAQILEFEK	K	V	0.987	39.5	25	39.5	1536.79	3731	324142	701	713
sample Treatment	2022 5:30:55 PM;File Size: 1000722054 [Byte] (F057606)	Protein translocase subunit SecA 1 OS=Pediococcus pentosaceus (strain ATCC 25745 / CCUG 21536 / LMG 10740 / 183-1w) OX=278197 GN=secA1 PE=3 SV=1	SECA1_PEDPA	secA1	Uniprot_Pediococcus_pentosaceus_strain_ATCC.fasta	89512.7	1	20	23	43	0.000935	0.351	DDRPDLLYPTLESK	R	F	0.989	40.5	25	40.5	1661.84	2984	38426.4	400	413
sample Treatment	2022 5:30:55 PM;File Size: 1000722054 [Byte] (F057606)	Protein translocase subunit SecA 1 OS=Pediococcus pentosaceus (strain ATCC 25745 / CCUG 21536 / LMG 10740 / 183-1w) OX=278197 GN=secA1 PE=3 SV=1	SECA1_PEDPA	secA1	Uniprot_Pediococcus_pentosaceus_strain_ATCC.fasta	89512.7	1	20	23	43	0.000935	0.351	EAEIVTNAGQK	R	G	0.997	57.1	25	43.7	1159.6	1672.5	189829	466	476
sample Treatment	2022 5:30:55 PM;File Size: 1000722054 [Byte] (F057606)	Protein translocase subunit SecA 1 OS=Pediococcus pentosaceus (strain ATCC 25745 / CCUG 21536 / LMG 10740 / 183-1w) OX=278197 GN=secA1 PE=3 SV=1	SECA1_PEDPA	secA1	Uniprot_Pediococcus_pentosaceus_strain_ATCC.fasta	89512.7	1	20	23	43	0.000935	0.351	EGIPHVVLNAK	R	N	0.992	43.8	25	43.8	1176.67	2532	212337	451	461
sample Treatment	2022 5:30:55 PM;File Size: 1000722054 [Byte] (F057606)	Protein translocase subunit SecA 1 OS=Pediococcus pentosaceus (strain ATCC 25745 / CCUG 21536 / LMG 10740 / 183-1w) OX=278197 GN=secA1 PE=3 SV=1	SECA1_PEDPA	secA1	Uniprot_Pediococcus_pentosaceus_strain_ATCC.fasta	89512.7	1	20	23	43	0.000935	0.351	EHVEIQDGAK	K	T	0.974	35	25	35	1125.55	1521	28770.5	340	349
sample Treatment	2022 5:30:55 PM;File Size: 1000722054 [Byte] (F057606)	Protein translocase subunit SecA 1 OS=Pediococcus pentosaceus (strain ATCC 25745 / CCUG 21536 / LMG 10740 / 183-1w) OX=278197 GN=secA1 PE=3 SV=1	SECA1_PEDPA	secA1	Uniprot_Pediococcus_pentosaceus_strain_ATCC.fasta	89512.7	1	20	23	43	0.000935	0.351	EIYNMEVTTIPTNRPVAR	R	D	0.97	34.3	25	34.3	2104.09	2855	203099	382	399
sample Treatment	2022 5:30:55 PM;File Size: 1000722054 [Byte] (F057606)	Protein translocase subunit SecA 1 OS=Pediococcus pentosaceus (strain ATCC 25745 / CCUG 21536 / LMG 10740 / 183-1w) OX=278197 GN=secA1 PE=3 SV=1	SECA1_PEDPA	secA1	Uniprot_Pediococcus_pentosaceus_strain_ATCC.fasta	89512.7	1	20	23	43	0.000935	0.351	EVIYAER	R	Q	0.9	31.3	25	23.8	879.457	1830	89144.1	608	614
[truncated: 11,413 more rows]
